# Supplementary material for: Functional characterisation of peroxisomal β-oxidation disorders in fibroblasts using lipidomics
Source: J Inherit Metab Dis. 2017 Aug 28;41(3):479–87. doi: 10.1007/s10545-017-0076-9 (PMC5959964; doi:10.1007/s10545-017-0076-9)
Supplement: Supplementary file 2 — (XLSX 7915 kb) [file 10545_2017_76_MOESM2_ESM.xlsx]

## Sheet: peaklist_normPC678.txt
IsolabMidas	EICplots_before_norm	mzmed	rtmed	normalized_Boxplots	norm_OnewayAnova_Fstat	norm_OnewayANOVA_pvalue	norm_OnewayANOVA_Bonf	fold_ACBD5vsControl	pvalue_ACBD5vsControl	Bonf_ACBD5vsControl	fold_ACOX1vsControl	pvalue_ACOX1vsControl	Bonf_ACOX1vsControl	fold_ALDvsControl	pvalue_ALDvsControl	Bonf_ALDvsControl	fold_DBPvsControl	pvalue_DBPvsControl	Bonf_DBPvsControl	Mean_Control	Mean_ACBD5	Mean_ACOX1	Mean_ALD	Mean_DBP	ppm	normCol	Formula	theormz	name	mzmin	mzmax	rtmin	rtmax	avint	metlin	norm_isocor_CTRL1	norm_isocor_CTRL2	norm_isocor_CTRL3	norm_isocor_CTRL4	norm_isocor_CTRL5	norm_isocor_CTRL6	norm_isocor_CTRL7	norm_isocor_ACBD5_s1	norm_isocor_ACBD5_s2	norm_isocor_ACBD5_s3	norm_isocor_ACOX1_1	norm_isocor_ACOX1_2	norm_isocor_ACOX1_3	norm_isocor_ACOX1_4
BMP(28:0)		665.44	6.1578		1	1	1	1	1	1	1	1	1	1	1	1	1	1	1	200	200	200	200	200	-0.00151494	Negative_normalized on BMP	C34H67O10P1	665.44	M665T369	665.44	665.44	6.1033	6.2069	7.99679e+08	http://metlin.scripps.edu/metabo_list.php?mass_min=666.44612&mass_max=666.45012	200	200	200	200	200	200	200	200	200	200	200	200	200	200
BMP(36:2)		773.534	5.9426		4.04167	0.011586	7.6352	0.250679	0.0305066	1	0.267231	0.00528959	1	0.70859	0.443965	1	0.577153	0.177553	1	22.0946	5.53866	5.90436	15.656	12.752	-0.323999	Negative_normalized on BMP	C42H79O10P1	773.534	M774T357	773.534	773.535	5.8809	5.9783	5.22213e+07	http://metlin.scripps.edu/metabo_list.php?mass_min=774.53995&mass_max=774.54459	20.3479	15.7445	10.7201	43.3338	33.3436	14.9048	16.2676	4.39145	7.74646	4.47806	8.13017	1.78387	2.26916	19.1402
BMP(36:3)		771.519	5.9245		6.33513	0.00115649	0.762129	0.446307	0.0804308	1	0.236605	0.000884651	0.666471	0.968618	0.999368	1	0.672799	0.268788	1	6.56473	2.92988	1.55325	6.35872	4.41674	-0.376774	Negative_normalized on BMP	C42H77O10P1	771.518	M772T355	771.519	771.519	5.8809	5.9605	1.80732e+07	http://metlin.scripps.edu/metabo_list.php?mass_min=772.52435&mass_max=772.52898	7.39778	6.2965	4.39372	9.4705	10.1757	2.85554	5.36345	2.46236	3.94207	2.38522	2.2114	0.56816	1.00291	3.8377
BMP(36:4)		769.503	5.909		8.92206	0.000127988	0.084344	0.596444	0.231637	1	0.215517	0.000349045	0.244328	1.14038	0.835005	1	0.716084	0.340709	1	1.44467	0.861665	0.311351	1.64747	1.03451	-0.429826	Negative_normalized on BMP	C42H75O10P1	769.503	M770T355	769.503	769.503	5.8712	5.9426	4.31528e+06	http://metlin.scripps.edu/metabo_list.php?mass_min=770.50874&mass_max=770.51336	2.24006	1.50219	0.986575	1.48609	2.10481	0.628043	1.16492	0.714913	1.1348	0.735282	0.463858	0.0860299	0.259114	0.694578
BMP(36:6)		765.472	5.8898		2.72551	0.0520135	34.2769	0.665519	0.977408	1	2.4366	0.0661872	1	0.850693	0.99712	1	1.04105	0.999985	1	0.389998	0.259551	0.950267	0.331768	0.406009	-0.327746	Negative_normalized on BMP	C42H71O10P1	765.471	M765T353	765.472	765.472	5.8189	5.9229	1.94578e+06	http://metlin.scripps.edu/metabo_list.php?mass_min=766.47737&mass_max=766.48196	0.334918	0.337013	1.18117	0.225661	0.390723	0.0657498	0.194749	0.466708	0.235834	0.0761106	0.862386	1.16909	0.955422	0.269144
BMP(37:4)		783.519	5.8723		8.06924	0.000254084	0.167441	0.468682	0.0979695	1	0.217384	0.000669051	0.450118	1.10723	0.93878	1	0.628672	0.177115	1	0.400317	0.187621	0.0870227	0.443243	0.251668	-0.473107	Negative_normalized on BMP	C43H77O10P1	783.518	M784T352	783.518	783.519	5.8353	5.9248	1.12276e+06	http://metlin.scripps.edu/metabo_list.php?mass_min=784.52438&mass_max=784.52909	0.619583	0.390358	0.328412	0.397052	0.49174	0.245773	0.329302	0.115305	0.387326	0.0602329	0.0647117	0.0421596	0.0785207	0.16564
BMP(37:5)		781.503	5.8605		4.55066	0.00672058	4.42886	0.706904	0.71127	1	0.36689	0.0289443	1	1.20628	0.772205	1	0.562864	0.209622	1	0.253219	0.179002	0.0929037	0.305454	0.142528	-0.333655	Negative_normalized on BMP	C43H75O10P1	781.503	M782T352	781.503	781.504	5.8353	5.907	771251	http://metlin.scripps.edu/metabo_list.php?mass_min=782.50864&mass_max=782.51333	0.477978	0.271035	0.210808	0.223712	0.293536	0.141622	0.153844	0.0721619	0.3581	0.106744	0.0485268	0.155534	0.127334	0.0738135
BMP(37:6)		779.488	5.8367		0.580051	0.679831	448.008	1.36855	0.925543	1	1.56969	0.546414	1	1.49346	0.661965	1	1.11048	0.997958	1	0.184719	0.252798	0.289951	0.27587	0.205126	-0.616836	Negative_normalized on BMP	C43H73O10P1	779.487	M779T350_2	779.487	779.488	5.7995	5.8984	937055	http://metlin.scripps.edu/metabo_list.php?mass_min=780.49321&mass_max=780.49789	0.30934	0.247563	0.095358	0.147117	0.24372	0.0329852	0.21695	0.106105	0.601151	0.0511384	0.305091	0.22469	0.307379	0.166916
BMP(38:2)		801.566	5.907		1.85253	0.150349	99.0801	0.339453	0.57905	1	1.18679	0.977922	1	0.802816	0.973214	1	1.68988	0.354792	1	0.788786	0.267756	0.936121	0.63325	1.33295	-0.624398	Negative_normalized on BMP	C44H83O10P1	801.565	M802T354	801.566	801.566	5.8444	5.9426	3.33992e+06	http://metlin.scripps.edu/metabo_list.php?mass_min=802.57141&mass_max=802.57622	0.825274	0.53983	0.474533	1.44233	0.999699	0.609752	0.63008	0.185229	0.393798	0.22424	1.36511	0.296102	0.40007	2.74678
BMP(38:3)		799.55	5.8852		2.37353	0.0794089	52.3305	0.502231	0.438213	1	0.937116	0.998026	1	1.02079	0.999975	1	1.52749	0.213201	1	2.10456	1.05697	1.97221	2.14831	3.21469	-0.563517	Negative_normalized on BMP	C44H81O10P1	799.549	M800T353	799.55	799.55	5.8261	5.9248	8.77562e+06	http://metlin.scripps.edu/metabo_list.php?mass_min=800.55572&mass_max=800.56052	2.64022	1.73043	1.32755	2.98753	2.34075	1.59384	2.11157	0.987484	1.28061	0.902825	2.6679	0.722038	1.06626	4.94524
BMP(38:4)		797.535	5.8625		5.5687	0.00239651	1.5793	0.523991	0.127291	1	0.457938	0.0135033	1	1.16701	0.741202	1	0.855118	0.840395	1	5.76391	3.02024	2.63951	6.72656	4.92882	-0.565022	Negative_normalized on BMP	C44H79O10P1	797.534	M798T352	797.535	797.535	5.8079	5.9051	1.91312e+07	http://metlin.scripps.edu/metabo_list.php?mass_min=798.54007&mass_max=798.54486	10.3876	4.95145	4.47645	5.57192	5.75963	4.10676	5.09353	2.99676	3.12046	2.94349	3.80327	1.03728	2.3709	4.88237
BMP(38:5)		795.519	5.8359		4.98663	0.00428164	2.8216	0.53573	0.339435	1	0.348622	0.025512	1	1.26751	0.594675	1	0.73612	0.637452	1	7.95134	4.25977	2.77201	10.0784	5.85314	-0.528822	Negative_normalized on BMP	C44H77O10P1	795.518	M796T350_2	795.519	795.519	5.7896	5.8891	2.56e+07	http://metlin.scripps.edu/metabo_list.php?mass_min=796.52441&mass_max=796.52918	17.5432	7.37726	6.33102	6.03746	6.76095	4.73639	6.87314	4.15292	4.29658	4.32981	3.80106	1.09747	2.61254	5.39941
BMP(38:6)		793.503	5.8359		7.93449	0.000284116	0.187233	0.480822	0.130816	1	0.331815	0.00508827	1	1.28748	0.378478	1	0.6854	0.335686	1	11.7228	5.63659	3.88982	15.0929	8.03483	-0.555451	Negative_normalized on BMP	C44H75O10P1	793.503	M794T350	793.503	793.503	5.7896	5.8841	3.67766e+07	http://metlin.scripps.edu/metabo_list.php?mass_min=794.50878&mass_max=794.51354	19.6519	12.0121	7.60117	11.6202	14.113	6.09773	10.9638	4.6455	7.05087	5.21341	4.67006	1.42408	2.45549	11.6649
BMP(38:7)		791.488	5.8182		14.5259	2.93456e-06	0.00193388	0.57593	0.125396	1	0.231347	0.000117129	0.0888133	1.30023	0.178541	1	0.617202	0.074074	1	3.83892	2.21095	0.888123	4.99146	2.36939	-0.695925	Negative_normalized on BMP	C44H73O10P1	791.487	M791T349	791.488	791.488	5.753	5.8535	1.17526e+07	http://metlin.scripps.edu/metabo_list.php?mass_min=792.49324&mass_max=792.49799	4.68488	4.199	2.67254	3.67396	5.03418	1.81283	4.79503	1.59054	3.17691	1.86539	1.07782	0.529913	0.400387	2.31016
BMP(38:8)		789.472	5.7822		0.988871	0.431712	284.498	0.614624	0.579076	1	1.17569	0.890856	1	1.13456	0.953852	1	0.914148	0.992069	1	0.29586	0.181842	0.347838	0.335671	0.27046	-0.685117	Negative_normalized on BMP	C44H71O10P1	789.471	M789T347	789.472	789.472	5.733	5.8356	1.2071e+06	http://metlin.scripps.edu/metabo_list.php?mass_min=790.47759&mass_max=790.48232	0.314663	0.360882	0.160576	0.322722	0.348957	0.246373	0.316846	0.0947248	0.298318	0.152484	0.299048	0.412176	0.435602	0.232813
BMP(39:7)		805.504	5.7826		9.93704	5.91705e-05	0.0389934	0.463462	0.0466265	1	0.288038	0.000422928	0.265237	1.16798	0.681363	1	0.705575	0.247862	1	2.64558	1.22612	0.762026	3.08998	1.86666	-0.820298	Negative_normalized on BMP	C45H75O10P1	805.503	M806T347	805.503	805.504	5.7347	5.8356	8.01587e+06	http://metlin.scripps.edu/metabo_list.php?mass_min=806.50896&mass_max=806.51379	3.03722	2.66535	1.66165	3.12351	3.33125	1.80703	2.89304	0.768318	1.88692	1.02314	1.05129	0.385633	0.283473	2.0241
BMP(40:10)		813.472	5.6568		12.0667	1.34382e-05	0.00885577	0.672729	0.886055	1	0.00278818	0.0286344	1	2.10395	0.0140477	1	0.0163718	0.0401771	1	0.340814	0.229276	0.00095025	0.717057	0.00557973	-0.923056	Negative_normalized on BMP	C46H71O10P1	813.471	M813T339	813.472	813.472	5.5515	5.7201	1.02811e+06	http://metlin.scripps.edu/metabo_list.php?mass_min=814.47773&mass_max=814.48261	0.626435	0.517539	0.381721	0.102818	0.228678	0.020716	0.507794	0.156247	0.231294	0.300286	0	0	0.00319005	0.0034617
BMP(40:4)		825.566	5.8364		10.4307	4.13143e-05	0.0272261	0.793855	0.984586	1	2.58437	0.00172326	1	1.35632	0.791998	1	3.06602	0.000133551	0.0811886	0.706605	0.560942	1.82613	0.95838	2.16647	-0.691037	Negative_normalized on BMP	C46H83O10P1	825.565	M826T350	825.566	825.566	5.7713	5.8824	5.26441e+06	http://metlin.scripps.edu/metabo_list.php?mass_min=826.57141&mass_max=826.57637	1.15195	0.60291	0.776803	0.644732	0.586582	0.54435	0.638912	0.635933	0.563557	0.483337	2.70789	0.917117	1.3356	2.95391
BMP(40:5)		823.55	5.8036		8.22389	0.000223767	0.147463	0.74023	0.90807	1	1.97517	0.0106589	1	1.30542	0.707967	1	2.39534	0.000417479	0.27259	3.97404	2.94171	7.84941	5.18781	9.5192	-0.534953	Negative_normalized on BMP	C46H81O10P1	823.549	M824T348	823.55	823.551	5.753	5.8535	2.49673e+07	http://metlin.scripps.edu/metabo_list.php?mass_min=824.55564&mass_max=824.56058	7.12747	3.47232	3.94934	3.23738	3.4714	2.49031	4.07008	3.28282	2.84203	2.70027	12.0872	4.09796	5.84068	11.6004
BMP(40:6)		821.535	5.7871		4.22042	0.00954721	6.29161	0.521939	0.0643849	1	0.678149	0.125577	1	1.15241	0.709345	1	0.915164	0.953806	1	27.009	14.0971	18.3161	31.1253	24.7177	-0.353758	Negative_normalized on BMP	C46H79O10P1	821.534	M822T347	821.534	821.535	5.7347	5.8535	9.63626e+07	http://metlin.scripps.edu/metabo_list.php?mass_min=822.53985&mass_max=822.54478	39.7217	23.9407	22.0944	28.7102	26.8409	18.4828	29.2724	12.9367	16.3144	13.0401	27.4313	10.0139	9.15825	37.965
BMP(40:7)		819.519	5.7623		9.99034	5.68924e-05	0.0374921	0.451148	0.0179716	1	0.378853	0.00063174	0.321373	1.12046	0.810993	1	0.659871	0.086624	1	97.3845	43.9348	36.8944	109.116	64.2612	-0.501133	Negative_normalized on BMP	C46H77O10P1	819.518	M820T346	819.519	819.519	5.6981	5.8017	2.93536e+08	http://metlin.scripps.edu/metabo_list.php?mass_min=820.52432&mass_max=820.52924	129.72	90.4109	65.6106	112.808	99.2542	75.1333	108.755	32.5722	61.228	38.0043	51.716	20.2594	12.7629	95.6805
BMP(40:8)		817.504	5.7303		16.9959	7.50188e-07	0.000494374	0.700246	0.32267	1	0.280845	0.000106215	0.0674066	1.39044	0.0361804	1	0.659322	0.0946509	1	16.8852	11.8238	4.74212	23.4778	11.1328	-0.759327	Negative_normalized on BMP	C46H75O10P1	817.503	M818T344	817.503	817.504	5.6798	5.7833	5.51982e+07	http://metlin.scripps.edu/metabo_list.php?mass_min=818.50889&mass_max=818.51379	27.1423	19.3311	14.713	12.7336	16.837	7.46976	19.9697	8.84783	15.7732	10.8503	6.35263	3.1842	2.50716	9.17216
BMP(40:9)		815.488	5.7075		12.2225	1.21355e-05	0.00799729	0.67746	0.664497	1	0.082164	0.0016047	1	1.52215	0.0996481	1	0.319	0.0284311	1	2.07623	1.40657	0.170592	3.16033	0.662319	-0.969747	Negative_normalized on BMP	C46H73O10P1	815.487	M815T342	815.487	815.488	5.6432	5.7654	5.96079e+06	http://metlin.scripps.edu/metabo_list.php?mass_min=816.49341&mass_max=816.4983	4.60052	2.24525	1.87856	1.1386	1.69331	0.855449	2.12196	1.17064	1.53999	1.50907	0.164886	0.124206	0.0622463	0.531275
BMP(41:9)		829.503	5.673		27.8193	6.97333e-09	4.59542e-06	0.415326	0.00698876	1	0.11909	1.2471e-06	0.008427	1.25625	0.187064	1	0.232313	2.29499e-05	0.0281897	0.271436	0.112735	0.0323252	0.340992	0.0630581	-0.5434	Negative_normalized on BMP	C47H75O10P1	829.503	M830T340	829.503	829.504	5.6065	5.7201	689342	http://metlin.scripps.edu/metabo_list.php?mass_min=830.50868&mass_max=830.51366	0.435469	0.251879	0.210168	0.260954	0.232973	0.320646	0.187965	0.0723064	0.18642	0.0794774	0.0465722	0.033962	0.0088626	0.0695506
BMP(42:10)		841.503	5.6211		6.32591	0.00116641	0.768664	0.719926	0.844716	1	0.210479	0.0239902	1	1.45405	0.296856	1	0.481473	0.22492	1	23.7385	17.09	4.99646	34.5171	11.4295	-0.476234	Negative_normalized on BMP	C48H75O10P1	841.503	M842T337	841.503	841.504	5.5515	5.6871	7.43055e+07	http://metlin.scripps.edu/metabo_list.php?mass_min=842.5086&mass_max=842.51365	61.9657	23.7407	22.9395	8.76557	11.3568	13.9015	23.4998	16.8681	14.0209	20.381	5.3113	3.54988	6.44005	4.70907
BMP(42:11)		839.488	5.6189		26.8449	9.96185e-09	6.56486e-06	0.62921	0.345016	1	0.0278488	3.35753e-05	0.0388208	1.64693	0.00483237	1	0.125048	0.000263819	0.20282	14.0774	8.85765	0.392039	23.1845	1.76036	-0.51319	Negative_normalized on BMP	C48H73O10P1	839.487	M839T337	839.488	839.488	5.5515	5.6705	3.90124e+07	http://metlin.scripps.edu/metabo_list.php?mass_min=840.49298&mass_max=840.49802	24.635	17.6588	15.0571	6.41651	9.53631	7.16082	18.0773	6.90544	9.39131	10.2762	0.426825	0.363836	0.291635	0.597086
BMP(42:5)		851.582	5.7643		24.4215	2.53416e-08	1.67001e-05	1.05654	0.999998	1	8.46041	1.42547e-06	0.000561641	1.07682	0.999982	1	8.19623	1.51973e-06	0.00103511	0.0934023	0.0986831	0.790222	0.100578	0.765547	-0.42325	Negative_normalized on BMP	C48H85O10P1	851.581	M852T346	851.581	851.582	5.7035	5.8058	1.59662e+06	http://metlin.scripps.edu/metabo_list.php?mass_min=852.58678&mass_max=852.59189	0.166693	0.0971055	0.0749443	0.0602519	0.0720049	0.055787	0.12703	0.100409	0.0993514	0.0962888	1.17187	0.459565	0.553598	1.20745
BMP(42:6)		849.566	5.7435		17.2668	6.51518e-07	0.000429351	0.869766	0.997767	1	3.44822	6.36351e-05	0.0102878	1.30024	0.889856	1	3.49028	1.25251e-05	0.0126361	0.797276	0.693444	2.74919	1.03665	2.78272	-0.459642	Negative_normalized on BMP	C48H83O10P1	849.565	M850T345	849.566	849.566	5.6798	5.7855	6.88353e+06	http://metlin.scripps.edu/metabo_list.php?mass_min=850.57116&mass_max=850.57626	1.28585	0.690695	0.71183	0.72474	0.658427	0.617946	0.891442	0.767466	0.615065	0.6978	4.16661	1.60117	2.15207	4.29749
BMP(42:7)		847.55	5.7092		8.5165	0.000176538	0.116338	0.89194	0.994891	1	2.11265	0.00186341	1	1.36649	0.516491	1	2.30565	0.000483215	0.308924	3.39712	3.03003	7.17692	4.64213	7.83255	-0.354622	Negative_normalized on BMP	C48H81O10P1	847.549	M848T343	847.55	847.55	5.6615	5.7529	2.18252e+07	http://metlin.scripps.edu/metabo_list.php?mass_min=848.55542&mass_max=848.56051	5.62722	3.12227	2.85964	3.17367	2.59945	2.62236	3.77524	3.13088	3.04868	2.91052	10.1775	4.34787	5.98006	12.7239
BMP(42:8)		845.535	5.6915		2.45863	0.0716359	47.208	0.947749	0.998992	1	1.15776	0.866184	1	1.47393	0.0956323	1	1.48233	0.105961	1	9.28449	8.79937	10.7492	13.6847	13.7627	-0.438331	Negative_normalized on BMP	C48H79O10P1	845.534	M846T341	845.534	845.535	5.6249	5.7365	4.61447e+07	http://metlin.scripps.edu/metabo_list.php?mass_min=846.53986&mass_max=846.54493	18.3001	8.96439	8.43372	5.89487	6.36483	6.72219	10.3113	8.73655	8.44137	9.22018	14.3855	6.69094	10.2003	17.0632
BMP(42:9)		843.519	5.6588		6.03246	0.00153493	1.01152	0.844722	0.956286	1	0.436383	0.0592433	1	1.48127	0.127062	1	0.717456	0.577829	1	21.0705	17.7987	9.19481	31.2111	15.1172	-0.415744	Negative_normalized on BMP	C48H77O10P1	843.518	M844T340	843.519	843.519	5.5882	5.7201	7.60347e+07	http://metlin.scripps.edu/metabo_list.php?mass_min=844.52418&mass_max=844.52925	47.7282	19.6425	20.5019	10.2426	12.8283	14.1376	22.4125	17.3304	16.113	19.9528	10.8301	6.53765	10.1535	11.7562
BMP(43:10)		855.519	5.6216		3.92716	0.0131327	8.65443	0.632401	0.483096	1	0.623224	0.246053	1	1.3697	0.260726	1	0.823385	0.842453	1	0.266475	0.168519	0.166073	0.364991	0.219411	-0.398224	Negative_normalized on BMP	C49H77O10P1	855.518	M856T337	855.519	855.52	5.5515	5.6871	1.0145e+06	http://metlin.scripps.edu/metabo_list.php?mass_min=856.52415&mass_max=856.52928	0.469881	0.245266	0.215323	0.100352	0.150753	0.367883	0.315865	0.143601	0.240132	0.121823	0.281132	0.120625	0.0874404	0.276851
BMP(43:11)		853.504	5.6031		11.8214	1.5805e-05	0.0104155	0.508527	0.0721726	1	0.178524	5.44802e-05	0.0445181	1.07905	0.964961	1	0.449892	0.00819039	1	0.187749	0.0954754	0.0335178	0.202591	0.0844667	-0.762449	Negative_normalized on BMP	C49H75O10P1	853.503	M854T336	853.503	853.504	5.5674	5.6599	499852	http://metlin.scripps.edu/metabo_list.php?mass_min=854.50881&mass_max=854.51393	0.156923	0.243234	0.173213	0.180752	0.211489	0.147637	0.200995	0.0288718	0.19434	0.0632143	0.0573506	0.0204764	0.0102781	0.0685567
BMP(43:6)		863.582	5.7076		19.0351	2.69251e-07	0.000177436	2.02891	0.991737	1	17.3193	3.9881e-07	0.00029454	1.85527	0.989246	1	12.7535	0.000187165	0.150352	0.00912241	0.0185085	0.157994	0.0169246	0.116342	-0.475268	Negative_normalized on BMP	C49H85O10P1	863.581	M864T342	863.581	863.582	5.6502	5.748	277353	http://metlin.scripps.edu/metabo_list.php?mass_min=864.58679&mass_max=864.59197	0.0354209	0	0.00708035	0	0	0.00773209	0.0136235	0.00801308	0.0365742	0.0109382	0.228981	0.0933637	0.154454	0.247731
BMP(43:7)		861.566	5.673		17.6886	5.24716e-07	0.000345788	1.18969	0.998893	1	5.75387	2.22812e-06	0.000935702	1.74304	0.714333	1	5.20056	2.22287e-05	0.0183395	0.121878	0.144998	0.701271	0.212439	0.633835	-0.77823	Negative_normalized on BMP	C49H83O10P1	861.565	M862T340	861.565	861.567	5.5882	5.8478	1.56211e+06	http://metlin.scripps.edu/metabo_list.php?mass_min=862.5714&mass_max=862.57657	0.261719	0.115806	0.129606	0.0969032	0.0685143	0.10192	0.0786796	0.186979	0.126911	0.121103	1.0349	0.506375	0.67043	0.817323
BMP(43:8)		859.55	5.6535		6.8269	0.000739158	0.487105	0.84968	0.976503	1	1.91123	0.00580014	1	1.52626	0.159142	1	2.09329	0.00137878	0.87031	0.699021	0.593944	1.33599	1.06689	1.46326	-0.675423	Negative_normalized on BMP	C49H81O10P1	859.549	M860T339	859.55	859.551	5.6065	5.7036	4.3532e+06	http://metlin.scripps.edu/metabo_list.php?mass_min=860.55567&mass_max=860.56083	1.30585	0.726072	0.697334	0.464166	0.385425	0.652975	0.66132	0.655787	0.529024	0.597022	1.90375	1.06641	1.00003	1.8773
BMP(43:9)		857.535	5.6221		4.63043	0.00618189	4.07386	0.696635	0.545486	1	1.0925	0.966807	1	1.57973	0.0152974	1	1.31612	0.322654	1	1.97084	1.37295	2.15314	3.1134	2.59385	-0.478843	Negative_normalized on BMP	C49H79O10P1	857.534	M858T337	857.534	857.535	5.5515	5.6705	9.42203e+06	http://metlin.scripps.edu/metabo_list.php?mass_min=858.53986&mass_max=858.545	3.82293	2.06065	1.88615	1.15594	1.08903	1.94294	1.83824	1.36234	1.32719	1.42934	3.1773	1.72298	1.24104	2.96034
BMP(44:10)		869.534	5.6023		11.1026	2.57379e-05	0.0169613	1.24027	0.958183	1	3.00494	1.83088e-05	0.0283283	1.52762	0.391694	1	2.51577	0.00109012	0.733678	17.0445	21.1397	51.2176	26.0375	42.8799	-0.0122182	Negative_normalized on BMP	C50H79O10P1	869.534	M870T336	869.534	869.535	5.5331	5.6537	1.31407e+08	http://metlin.scripps.edu/metabo_list.php?mass_min=870.53942&mass_max=870.54464	33.0302	17.3072	19.8191	8.63987	10.7063	10.411	19.3976	23.4442	16.1822	23.7929	73.9044	43.6846	41.2825	51.5159
BMP(44:11)		867.519	5.5853		2.00733	0.124236	81.8714	0.862733	0.940194	1	1.11078	0.931542	1	1.39453	0.117891	1	1.00986	0.999995	1	70.76	61.0469	78.5989	98.6771	71.4577	-0.000793182	Negative_normalized on BMP	C50H77O10P1	867.518	M868T335	867.518	867.519	5.5148	5.6369	3.12431e+08	http://metlin.scripps.edu/metabo_list.php?mass_min=868.52376&mass_max=868.52897	119.227	74.1944	74.4902	40.0393	50.4455	49.676	87.2473	58.6982	61.577	62.8656	110.9	72.0751	38.5278	124.727
BMP(44:12)		865.503	5.5477		7.5598	0.000389609	0.256753	0.671484	0.351342	1	0.609828	0.0740979	1	1.41183	0.0553571	1	0.782975	0.525222	1	157.933	106.049	96.3119	222.975	123.657	-0.416812	Negative_normalized on BMP	C50H75O10P1	865.503	M866T333	865.503	865.503	5.4596	5.6043	5.83919e+08	http://metlin.scripps.edu/metabo_list.php?mass_min=866.50848&mass_max=866.51368	219.675	154.589	144.81	119.033	118.638	134.998	213.788	83.4336	136.455	98.2599	134.307	84.0071	29.8077	198.339
BMP(44:6)		877.597	5.6942		14.8702	2.40466e-06	0.00158467	1.20852	0.999999	1	29.0059	1.63772e-05	0.00600211	1.63633	0.999789	1	23.5748	0.000466706	0.356943	0.00482796	0.00583467	0.14004	0.00790016	0.113818	-0.64992	Negative_normalized on BMP	C50H87O10P1	877.596	M878T342	877.597	877.598	5.6502	5.748	234960	http://metlin.scripps.edu/metabo_list.php?mass_min=878.60256&mass_max=878.60783	0.00666982	0	0.00596118	0.00230594	0.00559642	0.00596295	0.00729945	0.0102789	0	0.00722513	0.220943	0.105567	0.0962538	0.219314
BMP(44:7)		875.582	5.6755		27.7958	7.03285e-09	4.63465e-06	2.24553	0.973676	1	18.3004	3.80652e-08	9.63872e-06	1.91246	0.978436	1	13.7894	7.48829e-06	0.00504252	0.0624148	0.140154	1.14222	0.119366	0.860661	-0.754279	Negative_normalized on BMP	C50H85O10P1	875.581	M876T341	875.581	875.583	5.5533	5.7365	2.01953e+06	http://metlin.scripps.edu/metabo_list.php?mass_min=876.587&mass_max=876.59226	0.0955941	0.0392513	0.118874	0.0269545	0.0264094	0.0415872	0.0882331	0.205264	0.0835865	0.131613	1.62027	0.885826	1.19941	1.0109
BMP(44:8)		873.566	5.6469		17.8976	4.71982e-07	0.000311036	1.73682	0.981723	1	10.505	7.68208e-07	0.000373198	1.75311	0.951629	1	7.13855	0.000644079	0.472985	0.568948	0.988162	5.97678	0.997428	4.06147	-0.527145	Negative_normalized on BMP	C50H83O10P1	873.565	M874T339	873.566	873.566	5.5698	5.6935	1.07904e+07	http://metlin.scripps.edu/metabo_list.php?mass_min=874.57116&mass_max=874.5764	1.25427	0.545395	0.782942	0.245739	0.277895	0.307619	0.568775	1.18109	0.701601	1.0818	7.65308	4.37201	7.54165	4.17105
BMP(44:9)		871.55	5.6211		17.3441	6.26014e-07	0.000412543	1.52926	0.931901	1	5.60991	6.32719e-07	0.000444297	1.62511	0.765468	1	4.3476	0.000185911	0.136832	3.55791	5.44096	19.9596	5.78201	15.4684	-0.207171	Negative_normalized on BMP	C50H81O10P1	871.549	M872T337	871.55	871.55	5.5515	5.6871	4.22837e+07	http://metlin.scripps.edu/metabo_list.php?mass_min=872.55524&mass_max=872.56046	7.76671	3.49078	4.50037	1.58055	1.83235	2.05411	3.68049	6.45735	4.02256	5.84297	26.9608	15.648	20.6542	17.2191
BMP(46:10)		897.566	5.5781		13.4003	5.75734e-06	0.00379408	1.585	0.990287	1	8.00061	6.07929e-05	0.0234286	1.35057	0.99632	1	7.18027	0.000343818	0.243858	0.135251	0.214373	1.08209	0.182667	0.971141	-0.86957	Negative_normalized on BMP	C52H83O10P1	897.565	M898T335	897.566	897.566	5.5278	5.6393	2.16532e+06	http://metlin.scripps.edu/metabo_list.php?mass_min=898.5714&mass_max=898.57679	0.152341	0.143827	0.261647	0.0597239	0.0529459	0.0265279	0.249746	0.230141	0.169731	0.243249	1.71255	0.981693	0.334919	1.28053
BMP(46:11)		895.55	5.5473		7.22344	0.000520711	0.343148	1.07292	0.999973	1	3.20767	0.0173868	1	1.11114	0.999608	1	4.13049	0.00104711	0.702318	0.398025	0.42705	1.27673	0.442261	1.64404	-0.313282	Negative_normalized on BMP	C52H81O10P1	895.549	M896T333	895.55	895.55	5.421	5.6043	3.4635e+06	http://metlin.scripps.edu/metabo_list.php?mass_min=896.55527&mass_max=896.56064	0.576646	0.3781	0.496287	0.265413	0.326724	0.160222	0.582786	0.349164	0.446387	0.485598	2.11161	1.10189	0.329848	2.31984
BMP(46:8)		901.598	5.6194		10.1686	4.99325e-05	0.0329055	#N/A	1	1	#N/A	4.71165e-05	0.0473279	#N/A	0.999987	1	#N/A	0.0702485	1	0	0.000715541	0.159756	0.00197545	0.0773586	-0.965363	Negative_normalized on BMP	C52H87O10P1	901.596	M902T337	901.597	901.598	5.5791	5.6599	203632	http://metlin.scripps.edu/metabo_list.php?mass_min=902.60278&mass_max=902.60819	0	0	0	0	0	0	0	0	0	0.00214662	0.182424	0.149433	0.0185585	0.18897
BMP(46:9)		899.582	5.6057		13.5237	5.33778e-06	0.0035176	2.69062	0.999143	1	40.8148	2.56707e-05	0.0272531	1.89717	0.999807	1	30.2584	0.00158616	1	0.0124602	0.0335256	0.50856	0.0236391	0.377025	-0.645225	Negative_normalized on BMP	C52H85O10P1	899.581	M900T336	899.582	899.582	5.5614	5.6246	819560	http://metlin.scripps.edu/metabo_list.php?mass_min=900.58685&mass_max=900.59225	0.0286544	0.0195201	0.0189015	0	0	0	0.0201453	0.0287218	0.0146379	0.0572172	0.770607	0.418386	0.13304	0.558289
CL1(56:0)		1239.84	6.8714		1	1	1	1	1	1	1	1	1	1	1	1	1	1	1	100	100	100	100	100	0.00023382	Negative_normalized on CL1	C65H126O17P2	1239.84	M1240T412	1239.84	1239.84	6.7914	6.9309	4.09208e+07	http://metlin.scripps.edu/metabo_list.php?mass_min=1240.84369&mass_max=1240.85113	100	100	100	100	100	100	100	100	100	100	100	100	100	100
CL1(66:5)		1369.92	6.6209		4.67175	0.00592113	3.90203	0.0200088	0.0164459	1	0.0911797	0.00358697	1	0.311267	0.0321967	1	0.197271	0.014606	1	2.56771	0.0513767	0.234123	0.799243	0.506535	0.759615	Negative_normalized on CL1	C75H136O17P2	1369.92	M1370T397	1369.92	1369.92	6.5547	6.7094	417989	http://metlin.scripps.edu/metabo_list.php?mass_min=1370.92051&mass_max=1370.92873	1.11838	2.92798	0.885917	2.04445	1.69425	7.53502	1.76797	0.108232	0.0317913	0.0141066	0.682961	0.20754	0.124073	0.150661
CL1(67:5)		1383.93	6.6179		3.25575	0.0279519	18.4203	0.0303832	0.0486056	1	0.136895	0.0199516	1	0.257663	0.0519189	1	0.23279	0.0542589	1	1.81183	0.0550492	0.248031	0.466843	0.421776	0.549646	Negative_normalized on CL1	C76H138O17P2	1383.93	M1384T397	1383.93	1383.93	6.5917	6.6916	304926	http://metlin.scripps.edu/metabo_list.php?mass_min=1384.93639&mass_max=1384.9447	1.20395	1.69009	0.859534	0.987226	0.717014	6.1178	1.10722	0	0.125165	0.0399827	0.582794	0.348735	0.0816371	0.212277
CL1(68:2)		1403.99	6.6675		0.467023	0.759317	500.39	1.40028	0.979398	1	1.27457	0.986756	1	1.76237	0.678545	1	1.84818	0.627983	1	0.640344	0.89666	0.816164	1.12852	1.18347	1.49639	Negative_normalized on CL1	C77H146O17P2	1404	M1404T400	1403.99	1404	6.6151	6.7277	386652	http://metlin.scripps.edu/metabo_list.php?mass_min=1404.99759&mass_max=1405.00602	2.4377	0.0931708	0.6231	0.285825	0.394449	0.167167	0.480996	0.551294	1.47771	0.660975	0.358149	0.545866	0.819764	1.54863
CL1(68:6)		1395.93	6.5963		7.94291	0.000282133	0.185926	0.136803	0.000883948	0.597199	0.226627	0.000151825	0.0912041	0.447563	0.0057396	1	0.455564	0.00922235	1	10.449	1.42946	2.36803	4.6766	4.7602	0.272702	Negative_normalized on CL1	C77H138O17P2	1395.93	M1396T396	1395.93	1395.93	6.5314	6.6874	2.2181e+06	http://metlin.scripps.edu/metabo_list.php?mass_min=1396.93674&mass_max=1396.94511	6.40658	10.9293	7.56691	9.52295	11.0587	19.5629	8.09586	0.403401	2.79968	1.08531	4.53038	3.03089	0.384799	1.26498
CL1(69:6)		1409.95	6.5799		5.88729	0.00176191	1.1611	0.187496	0.00506543	1	0.250615	0.000884399	0.583203	0.43554	0.0123301	1	0.458658	0.0225057	1	5.70925	1.07046	1.43082	2.48661	2.6186	-0.396654	Negative_normalized on CL1	C78H140O17P2	1409.95	M1410T395	1409.95	1409.95	6.4967	6.6561	1.23102e+06	http://metlin.scripps.edu/metabo_list.php?mass_min=1410.95329&mass_max=1410.96175	2.03959	6.14613	4.13489	5.59493	6.33085	11.247	4.47142	0.6064	1.99882	0.606169	3.07591	1.84174	0.218384	1.62268
CL1(70:8)		1419.93	6.5304		6.19348	0.00131935	0.869451	0.194877	0.0192668	1	0.134685	0.00106118	0.695704	0.829773	0.834014	1	0.425281	0.0426758	1	1.84746	0.360027	0.248825	1.53297	0.78569	-0.0981216	Negative_normalized on CL1	C79H138O17P2	1419.93	M1420T392	1419.93	1419.93	6.4955	6.5848	443385	http://metlin.scripps.edu/metabo_list.php?mass_min=1420.93719&mass_max=1420.94571	1.25426	1.61381	2.78296	1.02605	1.49475	3.55437	1.20603	0.140521	0.357163	0.582397	0.762833	0.284203	0.060884	0.0770863
CL1(71:7)		1435.97	6.5107		7.14879	0.000555817	0.366284	0.264121	0.00143338	1	0.37458	0.000570031	0.343723	0.443884	0.00207573	1	0.527714	0.012139	1	7.73376	2.04265	2.89691	3.4329	4.08121	-0.486919	Negative_normalized on CL1	C80H142O17P2	1435.96	M1436T391	1435.96	1435.97	6.4237	6.634	1.77331e+06	http://metlin.scripps.edu/metabo_list.php?mass_min=1436.96901&mass_max=1436.97762	3.90161	7.96305	6.59132	9.81608	8.76801	11.491	5.60521	0.823351	3.98986	1.31473	5.68246	2.13795	1.34594	3.19096
CL1(72:6)		1452	6.5145		1.87732	0.145818	96.094	0.651061	0.105691	1	0.878265	0.7166	1	0.811068	0.355253	1	0.730694	0.127887	1	92.3057	60.0967	81.0688	74.8662	67.4472	-0.605422	Negative_normalized on CL1	C81H146O17P2	1452	M1452T391	1451.99	1452	6.4061	6.5649	3.0618e+07	http://metlin.scripps.edu/metabo_list.php?mass_min=1453.00044&mass_max=1453.00915	83.4176	94.5714	133.642	101.985	93.1359	71.3945	67.9934	45.8802	79.6182	54.7916	103.812	53.8334	46.5683	115.095
CL1(72:9)		1445.95	6.4598		6.39882	0.00109042	0.718588	0.325934	0.0139835	1	0.275356	0.000605734	0.411909	0.81729	0.654584	1	0.53453	0.0399524	1	6.93574	2.26059	1.9098	5.66851	3.70736	-0.276125	Negative_normalized on CL1	C81H140O17P2	1445.95	M1446T388	1445.95	1445.95	6.4236	6.4961	1.79076e+06	http://metlin.scripps.edu/metabo_list.php?mass_min=1446.95302&mass_max=1446.9617	6.27612	8.7984	10.7798	5.47589	5.19687	6.74651	5.27661	1.95261	2.76031	2.06887	3.27325	1.65081	2.14718	1.3283
CL1(73:8)		1461.98	6.4421		3.74235	0.0161109	10.6171	0.403325	0.0143449	1	0.552118	0.0180553	1	0.629354	0.0594141	1	0.601067	0.0493067	1	4.76088	1.92018	2.62857	2.99628	2.86161	0.0553126	Negative_normalized on CL1	C82H144O17P2	1461.98	M1462T387	1461.98	1461.98	6.3705	6.4955	1.29657e+06	http://metlin.scripps.edu/metabo_list.php?mass_min=1462.98379&mass_max=1462.99256	3.92487	3.552	4.65331	5.81764	3.67126	7.77915	3.92792	0.619298	3.52442	1.61682	4.887	1.64739	2.47995	1.60595
CL1(74:10)		1471.97	6.406		5.03137	0.00409134	2.69619	0.530844	0.0723165	1	0.37148	0.000951303	0.644532	0.783385	0.425932	1	0.615456	0.0664479	1	11.3981	6.0506	4.23416	8.92909	7.01502	-0.169296	Negative_normalized on CL1	C83H142O17P2	1471.96	M1472T384	1471.96	1471.97	6.3713	6.4411	3.16719e+06	http://metlin.scripps.edu/metabo_list.php?mass_min=1472.96845&mass_max=1472.97728	9.8511	10.8304	15.409	12.1541	13.1659	9.29155	9.08455	4.97972	7.60153	5.57057	8.54716	3.37345	2.15223	3.69732
CL1(76:11)		1497.98	6.3725		2.10347	0.110398	72.7523	0.541269	0.101614	1	0.696762	0.192825	1	0.738463	0.304796	1	0.606018	0.0746461	1	6.24668	3.38113	4.35245	4.61294	3.7856	0.53463	Negative_normalized on CL1	C85H144O17P2	1497.98	M1498T382	1497.98	1497.98	6.3209	6.4064	1.86343e+06	http://metlin.scripps.edu/metabo_list.php?mass_min=1498.98296&mass_max=1498.99195	6.16974	5.62076	9.37289	6.84606	6.73446	4.59988	4.38298	2.68318	4.1198	3.34042	7.62339	3.09529	3.42359	3.5503
CL2(56:0)		619.416	6.8702		1	1	1	1	1	1	1	1	1	1	1	1	1	1	1	100	100	100	100	100	-0.0049742	Negative_normalized on CL2	C65H126O17P2	619.416	M619T412	619.416	619.417	6.7914	6.9219	2.98799e+08	http://metlin.scripps.edu/metabo_list.php?mass_min=620.4224&mass_max=620.42612	100	100	100	100	100	100	100	100	100	100	100	100	100	100
CL2(64:4)		671.448	6.6736		2.42427	0.0746739	49.2101	0.0339704	0.105134	1	0.150337	0.0553539	1	0.227926	0.0908917	1	0.242428	0.118458	1	0.827119	0.0280976	0.124347	0.188522	0.200517	-0.883096	Negative_normalized on CL2	C73H134O17P2	671.448	M671T400	671.447	671.449	6.6047	6.7449	992360	http://metlin.scripps.edu/metabo_list.php?mass_min=672.45413&mass_max=672.45816	0.309869	0.699975	0.635309	0.430682	0.449986	3.1193	0.144706	0.0121469	0.0440955	0.0280504	0.299272	0.0807986	0.0544301	0.142407
CL2(65:3)		679.464	6.6885		1.58586	0.209011	137.738	0.109607	0.128819	1	0.4345	0.261588	1	0.552232	0.460082	1	0.385548	0.229293	1	0.3076	0.0337151	0.133652	0.169867	0.118595	-0.592952	Negative_normalized on CL2	C74H138O17P2	679.463	M679T401	679.463	679.464	6.6565	6.7571	526834	http://metlin.scripps.edu/metabo_list.php?mass_min=680.46958&mass_max=680.47365	0.147908	0.12859	0.333558	0.10206	0.185706	1.09355	0.161826	0.010487	0.0552604	0.0353979	0.210163	0.0755365	0.0804647	0.150082
CL2(65:4)		678.456	6.6695		2.5664	0.0629148	41.4608	0.0843661	0.0839571	1	0.191644	0.0412068	1	0.394842	0.166639	1	0.268607	0.0878565	1	0.727377	0.061366	0.139398	0.287199	0.195379	-0.335941	Negative_normalized on CL2	C74H136O17P2	678.455	M678T400	678.455	678.456	6.6205	6.7449	1.00969e+06	http://metlin.scripps.edu/metabo_list.php?mass_min=679.46157&mass_max=679.46564	0.201961	0.745805	0.566683	0.423402	0.388685	2.49929	0.265808	0.0472239	0.0648916	0.0719823	0.334238	0.0934673	0.0421342	0.210996
CL2(66:3)		686.472	6.6562		1.40603	0.260851	171.901	0.473725	0.110799	1	0.891824	0.940532	1	0.76769	0.542716	1	0.779582	0.619195	1	0.696379	0.329892	0.621048	0.534604	0.542885	-1.16226	Negative_normalized on CL2	C75H140O17P2	686.471	M686T399_2	686.471	686.473	6.5314	6.7804	1.69613e+06	http://metlin.scripps.edu/metabo_list.php?mass_min=687.47777&mass_max=687.48189	0.454693	0.546342	0.974003	1.0865	0.785391	0.818649	0.209075	0.320496	0.303696	0.365484	0.631894	0.248975	0.907777	0.721642
CL2(66:4)		685.464	6.6577		3.79593	0.0151797	10.0034	0.156013	0.0151876	1	0.353265	0.0164635	1	0.539733	0.116966	1	0.394129	0.0335332	1	5.14276	0.802338	1.81676	2.77572	2.02691	-1.20049	Negative_normalized on CL2	C75H138O17P2	685.463	M685T399	685.463	685.465	6.5314	6.7271	8.49826e+06	http://metlin.scripps.edu/metabo_list.php?mass_min=686.46998&mass_max=686.47409	3.0007	4.87798	5.18212	3.44151	2.99341	13.6838	2.81977	0.409889	1.0945	0.90262	2.64946	1.08707	1.488	2.17007
CL2(66:5)		684.456	6.6383		4.64378	0.00609631	4.01747	0.101193	0.0107241	1	0.221178	0.00409646	1	0.427447	0.0417294	1	0.347085	0.023295	1	4.04251	0.409074	0.894116	1.72796	1.40309	-0.71286	Negative_normalized on CL2	C75H136O17P2	684.455	M684T398	684.456	684.456	6.5314	6.7094	5.87845e+06	http://metlin.scripps.edu/metabo_list.php?mass_min=685.46182&mass_max=685.46593	1.8039	3.91883	3.33431	2.84952	3.42994	10.8087	2.15238	0.225293	0.694296	0.307632	1.61576	0.798259	0.338952	0.930504
CL2(67:4)		692.472	6.6392		6.50022	0.000993462	0.654691	0.282987	0.000432106	0.290183	0.617162	0.0157088	1	0.840632	0.525783	1	0.616584	0.0208795	1	2.66865	0.755192	1.64699	2.24335	1.64544	-1.19551	Negative_normalized on CL2	C76H140O17P2	692.471	M692T398_2	692.471	692.472	6.5314	6.7094	5.83082e+06	http://metlin.scripps.edu/metabo_list.php?mass_min=693.47778&mass_max=693.48194	2.34434	2.74001	3.64334	2.33548	1.85159	3.83002	1.93574	0.75265	0.728426	0.7845	2.31574	0.95506	1.35327	1.75295
CL2(67:5)		691.464	6.6326		5.32462	0.00304783	2.00852	0.131776	0.0042602	1	0.287995	0.00251141	1	0.452824	0.022363	1	0.430701	0.0225247	1	3.02538	0.398671	0.871295	1.36996	1.30303	-0.828517	Negative_normalized on CL2	C76H138O17P2	691.463	M691T398	691.464	691.464	6.5134	6.7048	4.74284e+06	http://metlin.scripps.edu/metabo_list.php?mass_min=692.46971&mass_max=692.47386	1.41981	2.85326	2.86308	2.62114	2.45063	7.27016	1.69958	0.200102	0.647276	0.348636	1.45694	0.87341	0.408008	0.853001
CL2(68:2)		701.496	6.6745		0.405097	0.803155	529.279	1.04617	0.999972	1	1.20479	0.975831	1	1.35975	0.848316	1	1.53119	0.634863	1	1.31037	1.37087	1.57872	1.78177	2.00642	-1.15861	Negative_normalized on CL2	C77H146O17P2	701.494	M701T400	701.495	701.496	6.5496	6.7804	4.91119e+06	http://metlin.scripps.edu/metabo_list.php?mass_min=702.50122&mass_max=702.50543	2.61374	1.12926	1.76293	1.0681	1.454	0.33356	0.810982	1.56027	1.14552	1.40681	0.997784	0.905175	1.89543	3.30057
CL2(68:3)		700.487	6.6764		1.46872	0.241496	159.146	0.403579	0.252978	1	0.554414	0.281159	1	0.85342	0.948544	1	0.537583	0.283502	1	3.09624	1.24958	1.7166	2.64239	1.66449	-0.839121	Negative_normalized on CL2	C77H144O17P2	700.487	M700T401	700.487	700.489	6.5496	6.7559	6.73208e+06	http://metlin.scripps.edu/metabo_list.php?mass_min=701.49317&mass_max=701.49737	2.01344	0.315207	5.33847	3.00522	0.640856	7.9915	2.36899	1.42176	1.00169	1.32528	2.83971	0.611054	2.49393	1.2824
CL2(68:4)		699.48	6.6258		3.72511	0.0164232	10.8229	0.364829	0.0196585	1	0.567982	0.0452426	1	0.8454	0.759482	1	0.550894	0.0455027	1	12.2733	4.47766	6.97102	10.3759	6.7613	-0.718857	Negative_normalized on CL2	C77H142O17P2	699.479	M699T398	699.479	699.48	6.5314	6.7048	2.63125e+07	http://metlin.scripps.edu/metabo_list.php?mass_min=700.48526&mass_max=700.48946	10.3095	12.873	17.5824	7.88109	5.91221	24.1866	7.16844	4.10491	4.75446	4.57363	9.27868	3.91773	7.41804	8.22829
CL2(68:5)		698.472	6.6162		8.10183	0.000247344	0.163	0.23059	0.000551485	0.385739	0.372421	0.000319539	0.191644	0.584969	0.0162791	1	0.440296	0.00170521	1	26.7662	6.17203	9.9683	15.6574	11.7851	-0.970487	Negative_normalized on CL2	C77H140O17P2	698.471	M698T397	698.471	698.472	6.5314	6.6874	4.63523e+07	http://metlin.scripps.edu/metabo_list.php?mass_min=699.47762&mass_max=699.48181	17.4238	28.2158	30.4912	22.8504	21.8072	50.4181	16.1571	4.5697	8.26477	5.68161	17.2428	7.24635	5.54286	12.3271
CL2(68:6)		697.464	6.5984		7.63231	0.000366297	0.24139	0.16782	0.00106597	0.704383	0.257028	0.000291523	0.127021	0.486476	0.00929529	1	0.43415	0.00598468	1	12.5103	2.09948	3.21549	6.08595	5.43134	-0.979104	Negative_normalized on CL2	C77H138O17P2	697.463	M697T396	697.464	697.464	6.5314	6.6739	1.98035e+07	http://metlin.scripps.edu/metabo_list.php?mass_min=698.4698&mass_max=698.47398	6.78466	12.6913	11.0644	11.9747	13.6197	24.0426	7.39466	1.31511	3.27042	1.7129	6.45563	3.10029	1.24754	3.0092
CL2(68:7)		696.456	6.5955		8.18312	0.000231362	0.152467	0.203213	0.00450814	1	0.134545	9.44571e-05	0.0685991	0.563323	0.0555746	1	0.258622	0.00114294	0.732307	0.721871	0.146693	0.0971242	0.406646	0.186692	-1.0021	Negative_normalized on CL2	C77H136O17P2	696.455	M696T396	696.456	696.457	6.4954	6.6561	1.0452e+06	http://metlin.scripps.edu/metabo_list.php?mass_min=697.46199&mass_max=697.46617	0.378792	0.8176	0.724991	0.522518	0.78393	1.48725	0.338009	0.10785	0.24733	0.0849004	0.221153	0.0851807	0.107083	0.089116
CL2(69:3)		707.496	6.6597		3.17529	0.0306723	20.213	0.222848	0.0233677	1	0.523229	0.0898531	1	0.867217	0.919414	1	0.564278	0.157323	1	1.67149	0.372487	0.874571	1.44954	0.943184	-1.17706	Negative_normalized on CL2	C78H146O17P2	707.494	M707T400	707.495	707.496	6.5337	6.7455	3.57814e+06	http://metlin.scripps.edu/metabo_list.php?mass_min=708.50121&mass_max=708.50546	0.354818	1.81288	1.99729	1.55679	1.14417	3.30903	1.52543	0.439541	0.335663	0.342257	1.81176	0.226329	0.518438	0.350886
CL2(69:4)		706.488	6.6212		2.03876	0.119526	78.7676	0.518845	0.168791	1	0.875733	0.910897	1	1.11589	0.928707	1	0.750955	0.528854	1	4.45195	2.30987	3.89872	4.96787	3.34321	-1.00185	Negative_normalized on CL2	C78H144O17P2	706.487	M706T397	706.487	706.488	6.5314	6.7919	1.19865e+07	http://metlin.scripps.edu/metabo_list.php?mass_min=707.49327&mass_max=707.49751	4.52457	4.20306	5.21285	3.21213	2.5612	8.16825	3.28156	2.10184	2.27713	2.55064	4.12202	1.98737	5.21527	4.02773
CL2(69:5)		705.48	6.5994		6.5545	0.000945405	0.623022	0.29468	0.000845235	0.597605	0.497527	0.00206821	1	0.676131	0.0586116	1	0.535721	0.00608886	1	12.0824	3.56044	6.01131	8.16927	6.47278	-1.25138	Negative_normalized on CL2	C78H142O17P2	705.479	M705T396	705.48	705.48	6.5134	6.6699	2.36165e+07	http://metlin.scripps.edu/metabo_list.php?mass_min=706.48562&mass_max=706.48986	8.27403	11.9132	13.2557	11.2143	9.39438	22.2777	8.24746	2.51564	4.73628	3.42939	10.4751	3.85514	4.43367	6.55536
CL2(69:6)		704.472	6.5978		7.56718	0.000387166	0.255142	0.193684	0.000616797	0.379075	0.350074	0.00039287	0.259793	0.493105	0.00504725	1	0.53132	0.0135485	1	6.64189	1.28643	2.32515	3.27515	3.52897	-1.07578	Negative_normalized on CL2	C78H140O17P2	704.471	M704T396	704.471	704.472	6.5134	6.6757	1.13682e+07	http://metlin.scripps.edu/metabo_list.php?mass_min=705.47767&mass_max=705.4819	3.74616	6.56055	6.03643	7.04363	7.03064	11.7408	4.33504	0.710989	2.11778	1.03052	4.53898	2.03048	1.0049	2.12762
CL2(69:7)		703.464	6.55		4.37083	0.00812794	5.35631	0.266402	0.0319771	1	0.293067	0.00617239	1	0.62044	0.215299	1	0.317937	0.0115829	1	0.366868	0.0977344	0.107517	0.227619	0.116641	-1.04183	Negative_normalized on CL2	C78H138O17P2	703.463	M703T393	703.463	703.465	6.4774	6.6383	602417	http://metlin.scripps.edu/metabo_list.php?mass_min=704.46983&mass_max=704.47405	0.326267	0.302122	0.380762	0.244329	0.339916	0.841816	0.132862	0.038491	0.152481	0.102231	0.134362	0.0485335	0.109254	0.116139
CL2(70:4)		713.494	6.6325		0.72564	0.582755	384.036	0.613598	0.842935	1	0.998278	1	1	1.22692	0.932712	1	0.672727	0.819699	1	12.5955	7.72859	12.5738	15.4537	8.47334	0.374549	Negative_normalized on CL2	C79H146O17P2	713.494	M713T398	713.492	713.497	6.5134	6.8335	3.44469e+07	http://metlin.scripps.edu/metabo_list.php?mass_min=714.5001&mass_max=714.50438	11.3931	22.8659	33.2096	0.953675	17.2116	0.821899	1.71291	7.41639	7.10796	8.66141	8.80884	5.8972	20.2228	17.1481
CL2(70:6)		711.479	6.5772		11.8306	1.57088e-05	0.0103521	0.291233	4.91123e-05	0.0462029	0.415049	3.64562e-05	0.0116421	0.59273	0.00172198	1	0.50058	0.000268754	0.18076	68.7278	20.0158	28.5254	40.737	34.4038	-0.608346	Negative_normalized on CL2	C79H142O17P2	711.479	M711T395	711.479	711.48	6.4954	6.635	1.24246e+08	http://metlin.scripps.edu/metabo_list.php?mass_min=712.48515&mass_max=712.48942	47.8328	71.0218	78.1788	71.214	75.8412	90.0475	46.9585	12.852	30.394	16.8014	50.3044	24.7202	13.8742	32.2065
CL2(70:7)		710.472	6.5454		6.86787	0.000712575	0.469587	0.22784	0.00146328	1	0.324811	0.000405946	0.273235	0.515017	0.0106432	1	0.546899	0.0237046	1	23.3736	5.32543	7.59201	12.0378	12.783	-1.08077	Negative_normalized on CL2	C79H140O17P2	710.471	M710T393_2	710.472	710.472	6.4786	6.6027	4.03927e+07	http://metlin.scripps.edu/metabo_list.php?mass_min=711.47767&mass_max=711.48193	12.7194	23.08	21.7039	26.1273	30.2507	32.7281	17.0058	3.36317	8.3879	4.22522	15.0366	7.47126	3.53021	6.53735
CL2(70:8)		709.464	6.5312		9.76262	6.73411e-05	0.0443778	0.384458	0.00229909	1	0.343125	4.36035e-05	0.033181	0.761669	0.193883	1	0.440372	0.00068896	0.442595	2.17669	0.836845	0.746877	1.65792	0.958554	-1.15988	Negative_normalized on CL2	C79H138O17P2	709.463	M709T392	709.463	709.464	6.4189	6.5848	4.04571e+06	http://metlin.scripps.edu/metabo_list.php?mass_min=710.4699&mass_max=710.47416	1.74937	2.3073	2.58583	1.86379	2.45381	2.84505	1.4317	0.532112	1.14677	0.831651	1.26183	0.439126	0.796604	0.571439
CL2(71:5)		719.495	6.5724		1.7872	0.162979	107.403	0.561448	0.0839164	1	0.947137	0.988873	1	0.945053	0.987151	1	0.791999	0.463455	1	12.3904	6.95657	11.7354	11.7096	9.8132	-1.08793	Negative_normalized on CL2	C80H146O17P2	719.494	M719T394	719.495	719.496	6.4954	6.635	3.27755e+07	http://metlin.scripps.edu/metabo_list.php?mass_min=720.50114&mass_max=720.50545	10.4855	12.736	16.6263	12.3731	9.33542	14.9001	10.2764	5.85273	7.29283	7.72416	16.476	5.90811	9.66765	16.9012
CL2(71:6)		718.488	6.5491		7.19808	0.000532361	0.350826	0.355072	0.000317492	0.166774	0.610388	0.00357465	1	0.628583	0.005608	1	0.627782	0.00797099	1	16.8054	5.96712	10.2578	10.5636	10.5501	-1.16605	Negative_normalized on CL2	C80H144O17P2	718.487	M718T393	718.487	718.488	6.4786	6.6175	3.45635e+07	http://metlin.scripps.edu/metabo_list.php?mass_min=719.49336&mass_max=719.49767	11.4867	17.2114	18.2939	18.9781	16.9806	21.6897	12.9973	4.38335	8.57291	4.94511	19.1088	6.64673	6.03077	12.3109
CL2(71:7)		717.48	6.5315		6.14877	0.00137574	0.906615	0.278856	0.00132608	0.917628	0.467261	0.00226775	1	0.528249	0.00663428	1	0.615995	0.0403932	1	7.38197	2.05851	3.44931	3.89952	4.54725	-1.14683	Negative_normalized on CL2	C80H142O17P2	717.479	M717T392	717.48	717.48	6.4603	6.5848	1.39162e+07	http://metlin.scripps.edu/metabo_list.php?mass_min=718.48553&mass_max=718.48984	4.35881	6.88795	6.77013	8.65561	8.79064	10.9675	5.24318	1.38487	3.12231	1.66834	6.95068	2.70823	2.22881	2.96015
CL2(72:7)		724.487	6.5132		4.97571	0.00432951	2.85315	0.396459	0.00302552	1	0.594131	0.0102486	1	0.617964	0.0163719	1	0.635355	0.0298772	1	75.8531	30.0726	45.0667	46.8745	48.1937	-0.369631	Negative_normalized on CL2	C81H144O17P2	724.487	M724T391	724.487	724.488	6.4597	6.567	1.55773e+08	http://metlin.scripps.edu/metabo_list.php?mass_min=725.49278&mass_max=725.49712	52.6489	74.5215	83.5422	94.2155	94.2371	75.1242	56.6824	20.5598	44.7213	24.9368	82.6538	37.0612	19.4004	49.6142
CL2(72:8)		723.48	6.4785		4.28029	0.00895291	5.89997	0.369818	0.0131457	1	0.448866	0.00485352	1	0.621637	0.0665024	1	0.669288	0.148358	1	28.3369	10.4795	12.7195	17.6153	18.9656	-1.01292	Negative_normalized on CL2	C81H142O17P2	723.479	M723T389	723.48	723.48	6.4419	6.5313	5.63301e+07	http://metlin.scripps.edu/metabo_list.php?mass_min=724.48542&mass_max=724.48976	19.9756	27.0813	29.5873	33.7827	37.421	29.2351	21.2754	7.3303	14.7699	9.3383	23.1364	11.441	7.37104	10.3557
CL2(72:9)		722.472	6.4602		9.29932	9.55608e-05	0.0629746	0.483598	0.0124374	1	0.332594	4.69648e-05	0.0300298	0.881153	0.756395	1	0.600578	0.0169177	1	4.78823	2.31558	1.59254	4.21917	2.87571	-1.13203	Negative_normalized on CL2	C81H140O17P2	722.471	M722T388	722.472	722.472	6.4254	6.5317	9.88162e+06	http://metlin.scripps.edu/metabo_list.php?mass_min=723.47769&mass_max=723.48202	4.36969	4.92386	6.35217	4.12022	5.61238	4.46249	3.6768	1.93945	2.96991	2.03738	3.06638	1.69746	1.33029	1.07872
CL2(73:6)		732.503	6.5464		1.73437	0.173972	114.647	0.953721	0.999702	1	1.57423	0.0940053	1	1.1275	0.963283	1	1.22722	0.803616	1	1.75939	1.67797	2.76968	1.98371	2.15915	-1.11635	Negative_normalized on CL2	C82H148O17P2	732.502	M733T393	732.502	732.504	6.4774	6.6175	6.31664e+06	http://metlin.scripps.edu/metabo_list.php?mass_min=733.50895&mass_max=733.51335	2.10978	1.51477	2.72194	1.71677	1.32659	1.77668	1.14918	1.69279	1.70084	1.64027	2.98582	1.55023	2.93283	4.15008
CL2(73:7)		731.496	6.4953		1.24711	0.316799	208.77	0.608263	0.168267	1	0.963015	0.997618	1	0.828075	0.631319	1	0.85626	0.780554	1	3.96733	2.41318	3.8206	3.28525	3.39707	-1.26147	Negative_normalized on CL2	C82H146O17P2	731.494	M731T390	731.495	731.496	6.4568	6.5473	1.04698e+07	http://metlin.scripps.edu/metabo_list.php?mass_min=732.50124&mass_max=732.50562	3.08882	2.86249	4.51014	3.79212	2.83208	7.25496	3.43069	1.9295	2.96722	2.34282	5.91254	1.99544	3.88727	3.35204
CL2(73:8)		730.488	6.4598		4.03779	0.0116351	7.66751	0.492441	0.00520239	1	0.676798	0.0240606	1	0.746411	0.0954915	1	0.718277	0.0689522	1	3.87851	1.90994	2.62497	2.89496	2.78585	-1.02369	Negative_normalized on CL2	C82H144O17P2	730.487	M730T388	730.487	730.488	6.4393	6.5134	8.82526e+06	http://metlin.scripps.edu/metabo_list.php?mass_min=731.49324&mass_max=731.49762	3.22149	3.36483	4.09268	3.91273	3.83282	5.53137	3.19365	1.601	2.27334	1.85548	4.35187	1.49091	2.67626	1.78033
CL2(73:9)		729.48	6.4418		4.11243	0.0107283	7.06995	0.489808	0.0309507	1	0.492408	0.00454606	1	0.685927	0.108048	1	0.593192	0.0334504	1	1.28311	0.628479	0.631815	0.880121	0.761132	-0.744127	Negative_normalized on CL2	C82H142O17P2	729.479	M729T387	729.479	729.481	6.388	6.5134	2.62933e+06	http://metlin.scripps.edu/metabo_list.php?mass_min=730.48521&mass_max=730.48958	0.998726	1.08522	1.63482	1.36151	1.46568	1.37769	1.05815	0.490923	0.716173	0.67834	1.20117	0.435038	0.677704	0.44397
CL2(74:10)		735.48	6.424		2.99268	0.0379396	25.0022	0.513684	0.0817729	1	0.53353	0.0233461	1	0.852666	0.771496	1	0.675445	0.182208	1	6.40428	3.28978	3.41687	5.46071	4.32574	-1.06437	Negative_normalized on CL2	C83H142O17P2	735.479	M735T385	735.48	735.48	6.3708	6.4532	1.42043e+07	http://metlin.scripps.edu/metabo_list.php?mass_min=736.48543&mass_max=736.48985	6.0413	6.59252	8.76785	6.49791	8.51442	4.19472	4.22122	2.66417	4.16997	3.03519	5.89145	2.7381	2.63216	2.47183
CL2(74:11)		734.472	6.4244		3.41269	0.0233536	15.39	0.250357	0.972455	1	1.07499	0.99999	1	1.62181	0.964993	1	4.85084	0.0200893	1	1.06302	0.266133	1.14274	1.72401	5.15652	-0.759536	Negative_normalized on CL2	C83H140O17P2	734.471	M734T385	734.471	734.472	6.379	6.4938	6.55777e+06	http://metlin.scripps.edu/metabo_list.php?mass_min=735.47739&mass_max=735.48179	0.754376	1.99013	1.46761	1.05531	1.1014	0.607572	0.464718	0.0898059	0.273295	0.435299	0.234754	0.0620332	1.31247	0.139311
CL2(74:6)		739.511	6.6025		4.91191	0.00462095	3.04521	0.346964	0.0399514	1	1.29545	0.35189	1	0.70138	0.343033	1	0.848351	0.859246	1	4.21135	1.46119	5.45558	2.95376	3.5727	-0.368754	Negative_normalized on CL2	C83H150O17P2	739.51	M740T396	739.51	739.511	6.4603	6.7453	1.11669e+07	http://metlin.scripps.edu/metabo_list.php?mass_min=740.51621&mass_max=740.52065	4.15464	3.41056	5.02327	4.35872	3.32271	5.82199	3.38759	1.03017	1.01941	2.33398	3.17987	3.10517	8.22163	5.9458
CL2(74:8)		737.495	6.4597		2.45707	0.0717711	47.2972	0.627081	0.0479327	1	0.883212	0.684824	1	0.800405	0.240015	1	0.729752	0.0847906	1	28.3299	17.7652	25.0213	22.6754	20.6738	-0.708834	Negative_normalized on CL2	C83H146O17P2	737.494	M737T388	737.495	737.496	6.4068	6.4955	7.00484e+07	http://metlin.scripps.edu/metabo_list.php?mass_min=738.50081&mass_max=738.50524	23.8322	26.6712	31.9095	33.229	28.9135	30.904	22.8503	15.536	19.2533	18.5062	37.3305	14.3462	17.6127	22.9309
CL2(74:9)		736.488	6.4389		1.92805	0.136976	90.2674	0.626351	0.144984	1	0.675142	0.0873673	1	0.81153	0.482777	1	0.722834	0.198302	1	21.4559	13.4389	14.4858	17.4121	15.5091	-0.947462	Negative_normalized on CL2	C83H144O17P2	736.487	M736T386	736.487	736.488	6.3895	6.4708	5.03426e+07	http://metlin.scripps.edu/metabo_list.php?mass_min=737.49317&mass_max=737.49759	19.3202	19.9684	27.2482	23.9342	24.9892	19.0173	15.7139	11.982	15.4283	12.9064	24.2198	10.9555	10.0279	11.1456
CL2(75:10)		742.487	6.406		1.3888	0.266428	175.576	0.472575	0.205862	1	0.720106	0.520549	1	0.906007	0.979025	1	0.633304	0.320628	1	0.410134	0.193819	0.29534	0.371584	0.25974	-0.791655	Negative_normalized on CL2	C84H144O17P2	742.487	M742T384	742.486	742.488	6.3314	6.4515	944980	http://metlin.scripps.edu/metabo_list.php?mass_min=743.49304&mass_max=743.4975	0.143947	0.428943	0.630707	0.477317	0.367274	0.630995	0.191758	0.112221	0.16482	0.304417	0.551752	0.292959	0.156649	0.354626
CL2(75:9)		743.496	6.424		0.982712	0.434849	286.566	0.520727	0.244847	1	0.954115	0.998356	1	0.817625	0.799009	1	0.803233	0.77906	1	0.752346	0.391766	0.717824	0.615136	0.604309	-1.07971	Negative_normalized on CL2	C84H146O17P2	743.494	M743T385_2	743.494	743.496	6.3347	6.5586	1.92559e+06	http://metlin.scripps.edu/metabo_list.php?mass_min=744.50108&mass_max=744.50554	0.538086	0.781121	0.98138	0.682857	0.572503	1.18955	0.520927	0.0762331	0.524333	0.574733	1.27573	0.282725	0.864363	0.718036
CL2(76:10)		749.495	6.3895		1.25159	0.315074	207.634	0.716982	0.437561	1	1.05162	0.991937	1	0.885876	0.876355	1	0.785557	0.492085	1	5.45329	3.90991	5.73482	4.83094	4.28387	-0.750854	Negative_normalized on CL2	C85H146O17P2	749.494	M749T383_2	749.495	749.496	6.3689	6.4532	1.46966e+07	http://metlin.scripps.edu/metabo_list.php?mass_min=750.50082&mass_max=750.50531	5.50236	4.81365	7.3289	5.63689	5.65635	5.67101	3.5639	3.6966	3.56044	4.47269	8.07015	3.39671	4.79612	4.43267
CL2(76:11)		748.487	6.3868		1.06024	0.39675	261.458	0.671557	0.421372	1	0.908049	0.959572	1	0.924526	0.979843	1	0.697474	0.307054	1	3.33896	2.2423	3.03194	3.08696	2.32884	-0.691786	Negative_normalized on CL2	C85H144O17P2	748.487	M748T383	748.487	748.488	6.3079	6.4181	8.5022e+06	http://metlin.scripps.edu/metabo_list.php?mass_min=749.49295&mass_max=749.49744	3.34098	3.34789	4.49178	3.52906	4.3527	2.31077	1.99955	2.16901	2.23791	2.31998	4.03502	2.81677	2.19837	2.34884
CL2(76:12)		747.48	6.3705		1.77175	0.166121	109.474	0.483894	0.277027	1	0.621743	0.322166	1	0.968646	0.999766	1	0.560359	0.234398	1	0.847221	0.409965	0.526754	0.820657	0.474748	-0.873369	Negative_normalized on CL2	C85H142O17P2	747.479	M747T382	747.479	747.481	6.3169	6.4241	1.92855e+06	http://metlin.scripps.edu/metabo_list.php?mass_min=748.48526&mass_max=748.48975	1.08285	0.846764	1.42255	0.437852	1.01464	0.507258	0.618632	0.53047	0.170736	0.528688	0.675584	0.303636	1.2968	0.222148
CL2(78:12)		761.495	6.3351		0.289007	0.882318	581.447	0.777597	0.92761	1	1.12965	0.972417	1	1.06134	0.998335	1	0.952595	0.999481	1	0.44143	0.343254	0.498659	0.468508	0.420504	-0.436984	Negative_normalized on CL2	C87H146O17P2	761.494	M761T380	761.494	761.496	6.2872	6.4043	1.31084e+06	http://metlin.scripps.edu/metabo_list.php?mass_min=762.50056&mass_max=762.50513	0.305634	0.470438	0.723701	0.575591	0.444434	0.407625	0.162584	0.377593	0.181377	0.470794	0.884353	0.398579	0.409949	0.187112
CL2FA(56:0)		760.545	6.8714		1.72234	0.176579	116.365	0.896868	0.443787	1	1.06362	0.635974	1	1.05663	0.720563	1	0.992481	0.99981	1	1.06078	0.951383	1.12827	1.12085	1.05281	-0.334146	Negative_normalized on CL2	C65H126O17P2C18H34O2	760.544	M761T412_1	760.545	760.545	6.7914	6.9309	3.22495e+06	http://metlin.scripps.edu/metabo_list.php?mass_min=761.55047&mass_max=761.55503	1.02294	1.07576	0.881868	1.15629	1.01477	1.23129	1.04256	0.981645	0.986504	0.886	1.21821	1.30805	0.916552	1.04013
CL2FA(70:7)		851.6	6.4961		1.09611	0.380124	250.502	0.498888	0.336613	1	0.722978	0.625334	1	0.675942	0.494193	1	0.973972	0.999919	1	0.382732	0.190941	0.276707	0.258705	0.372771	-0.374483	Negative_normalized on CL2	C79H140O17P2C18H34O2	851.599	M852T390	851.599	851.6	6.4241	6.6205	939948	http://metlin.scripps.edu/metabo_list.php?mass_min=852.60504&mass_max=852.61015	0.0721304	0.483945	0.338159	0.593717	0.404107	0.41225	0.374819	0.146362	0.31686	0.109599	0.58002	0.211014	0.163737	0.190007
CL2FA(72:6)		866.623	6.4776		0.282733	0.886369	584.117	0.978449	0.99995	1	1.00688	0.999999	1	0.949822	0.996215	1	1.13949	0.879864	1	0.902028	0.882589	0.908235	0.856766	1.02785	-0.0851733	Negative_normalized on CL2	C81H146O17P2C18H34O2	866.623	M867T389	866.622	866.624	6.4052	6.599	2.74964e+06	http://metlin.scripps.edu/metabo_list.php?mass_min=867.62822&mass_max=867.63342	1.0958	0.943135	1.11616	0.813871	0.936834	0.602164	0.806235	0.79352	1.29267	0.561574	1.658	0.603748	0.696902	0.869221
CL2FA(72:8)		864.607	6.4252		2.16065	0.102929	67.83	0.594017	0.188976	1	0.585137	0.0540057	1	0.88191	0.883006	1	0.778388	0.509355	1	0.48871	0.290302	0.285962	0.430998	0.380405	0.0302135	Negative_normalized on CL2	C81H142O17P2C18H34O2	864.607	M865T386	864.606	864.608	6.3531	6.4955	1.13826e+06	http://metlin.scripps.edu/metabo_list.php?mass_min=865.61247&mass_max=865.61766	0.316073	0.669184	0.454873	0.516884	0.585508	0.417144	0.461301	0.26103	0.298176	0.311698	0.480881	0.17294	0.187622	0.190879
LPA(14:0)		381.205	9.4741		1	1	1	1	1	1	1	1	1	1	1	1	1	1	1	100	100	100	100	100	0.0106974	Negative_normalized on LPA	C17H35O7P1	381.205	M381T568	381.205	381.205	9.4451	9.5149	5.30003e+07	http://metlin.scripps.edu/metabo_list.php?mass_min=382.21147&mass_max=382.21375	100	100	100	100	100	100	100	100	100	100	100	100	100	100
LPC(14:0)		468.309	10.2787		1	1	1	1	1	1	1	1	1	1	1	1	1	1	1	500	500	500	500	500	-0.520289	Positive_normalized on LPC	C22H46O7P1N1	468.308	M468T617_2	468.309	468.309	10.2784	10.2966	4.7386e+09	http://metlin.scripps.edu/metabo_list.php?mass_min=467.2995&mass_max=467.30231	500	500	500	500	500	500	500	500	500	500	500	500	500	500
LPC(15:0)		482.324	10.2426		1.41674	0.257442	159.871	0.645919	0.497116	1	1.21546	0.6915	1	1.05091	0.997491	1	1.19807	0.772224	1	4.18144	2.70087	5.08238	4.39433	5.00967	-0.214777	Positive_normalized on LPC	C23H48O7P1N1	482.324	M482T615	482.324	482.324	10.2244	10.2435	4.21352e+07	http://metlin.scripps.edu/metabo_list.php?mass_min=481.31497&mass_max=481.31787	7.41665	3.07673	3.48158	4.15307	3.30337	3.83915	3.99951	3.06738	1.93447	3.10076	6.39017	2.93525	6.28567	4.64151
LPC(15:1)		480.309	10.2426		1.29296	0.299589	186.045	0.012735	0.538843	1	1.28196	0.972878	1	0.304291	0.6171	1	1.20987	0.992043	1	3.10916	0.0395953	3.98582	0.946092	3.76168	-0.63221	Positive_normalized on LPC	C23H46O7P1N1	480.308	M480T615	480.309	480.309	10.1893	10.2609	2.5376e+07	http://metlin.scripps.edu/metabo_list.php?mass_min=479.29953&mass_max=479.30241	8.58286	0.0829448	0.0567713	6.1368	0.13126	0.0916632	6.68185	0.0424704	0.0388319	0.0374837	4.73817	3.12777	0.0206708	5.77155
LPC(16:0)		496.34	10.206		1.39432	0.26463	164.335	0.642994	0.243695	1	1.07803	0.964114	1	0.944258	0.989312	1	1.0538	0.991936	1	155.33	99.8762	167.45	146.672	163.687	-0.168288	Positive_normalized on LPC	C24H50O7P1N1	496.34	M496T612	496.34	496.34	10.1883	10.2075	1.43692e+09	http://metlin.scripps.edu/metabo_list.php?mass_min=495.33056&mass_max=495.33354	236.594	116.283	136.458	169.298	138.823	144.494	145.359	114.195	73.9709	111.463	204.966	108.319	178.149	179.787
LPC(16:1)		494.324	10.2065		2.91287	0.0416667	25.875	0.588349	0.067882	1	0.694142	0.0837757	1	0.981187	0.999691	1	0.919487	0.93819	1	16.1824	9.52091	11.2329	15.878	14.8795	-0.229792	Positive_normalized on LPC	C24H48O7P1N1	494.324	M494T612	494.324	494.324	10.1883	10.2075	1.29986e+08	http://metlin.scripps.edu/metabo_list.php?mass_min=493.31495&mass_max=493.31791	23.7634	13.0239	15.4848	15.6226	14.2562	13.9429	17.1832	10.8227	7.89133	9.84872	14.8044	6.80232	11.6723	12.4447
LPC(16:2)		492.308	10.2065		8.41468	0.000191625	0.118999	0.55865	0.120338	1	0.217397	0.00012718	0.0885258	0.870124	0.831253	1	0.414926	0.00484227	1	0.436478	0.243838	0.094889	0.379789	0.181106	0.0128864	Positive_normalized on LPC	C24H46O7P1N1	492.308	M492T612	492.308	492.309	10.1697	10.2966	2.41786e+06	http://metlin.scripps.edu/metabo_list.php?mass_min=491.29919&mass_max=491.30214	0.547886	0.29215	0.34085	0.367816	0.303988	0.732514	0.47014	0.249546	0.216988	0.264981	0.126144	0.0519332	0.098313	0.144618
LPC(17:0)		510.356	10.1716		0.673817	0.616375	382.769	0.754876	0.447994	1	1.02588	0.999061	1	0.979039	0.999591	1	0.966892	0.997903	1	14.8207	11.1878	15.2043	14.5101	14.3301	-0.594613	Positive_normalized on LPC	C25H52O7P1N1	510.355	M510T610	510.356	510.356	10.1535	10.1894	1.35808e+08	http://metlin.scripps.edu/metabo_list.php?mass_min=509.34639&mass_max=509.34945	21.9399	11.8498	14.3631	15.8084	11.8052	13.0312	14.9476	12.8251	8.29286	12.4455	17.5466	10.4441	17.4809	15.3717
LPC(17:1)		508.34	10.1567		2.46685	0.0709287	44.0467	0.52945	0.0563109	1	0.881806	0.833068	1	0.958042	0.995235	1	1.09304	0.92843	1	4.01583	2.12618	3.54118	3.84733	4.38946	-0.7348	Positive_normalized on LPC	C25H50O7P1N1	508.34	M508T609	508.34	508.34	10.1522	10.1723	3.49774e+07	http://metlin.scripps.edu/metabo_list.php?mass_min=507.33082&mass_max=507.33387	5.37946	3.35544	3.64824	4.20672	3.33659	4.09005	4.09431	2.42321	1.78435	2.17098	4.73976	2.23196	3.26909	4.40215
LPC(18:0)		524.371	10.1358		0.721913	0.585134	363.368	0.838562	0.73581	1	0.955166	0.990427	1	1.05966	0.972923	1	0.882389	0.796186	1	257.532	215.957	245.986	272.896	227.243	-0.216259	Positive_normalized on LPC	C26H54O7P1N1	524.371	M524T608_2	524.371	524.371	10.1334	10.1525	2.3358e+09	http://metlin.scripps.edu/metabo_list.php?mass_min=523.36181&mass_max=523.36496	372.117	215.097	242.32	255.149	212.175	225.457	280.407	248.186	164.41	235.273	271.281	169.478	297.971	223.467
LPC(18:1)		522.356	10.1178		1.60624	0.203817	126.57	0.688639	0.376847	1	1.1079	0.903718	1	1.0454	0.995517	1	1.18955	0.617744	1	93.8633	64.6379	103.991	98.1249	111.655	-0.657529	Positive_normalized on LPC	C26H52O7P1N1	522.355	M522T607_2	522.356	522.356	10.0999	10.1359	9.18293e+08	http://metlin.scripps.edu/metabo_list.php?mass_min=521.3464&mass_max=521.34953	125.659	79.8363	89.5373	95.6332	79.5279	84.2702	102.579	79.3807	47.305	67.2281	146.883	62.8597	92.4653	122.713
LPC(18:2)		520.34	10.1181		2.53223	0.065553	40.7084	0.610056	0.276412	1	1.07391	0.981365	1	1.01144	0.999987	1	1.32521	0.250003	1	7.98844	4.87339	8.5789	8.07983	10.5863	-0.737072	Positive_normalized on LPC	C26H50O7P1N1	520.34	M520T607	520.34	520.34	10.1152	10.1359	7.83662e+07	http://metlin.scripps.edu/metabo_list.php?mass_min=519.33079&mass_max=519.33391	10.3109	6.70257	8.57918	8.01046	8.61529	4.49989	9.20074	6.0967	3.91798	4.6055	12.0533	5.32797	5.67989	11.4314
LPC(19:0)		538.387	10.1003		0.983873	0.434257	269.673	0.996745	1	1	1.18018	0.527144	1	1.20363	0.420218	1	1.01446	0.999931	1	5.66762	5.64917	6.68879	6.8217	5.74956	-0.173362	Positive_normalized on LPC	C27H56O7P1N1	538.387	M538T606	538.387	538.388	9.9032	10.1181	5.85587e+07	http://metlin.scripps.edu/metabo_list.php?mass_min=537.3774&mass_max=537.38063	8.01551	5.4471	5.06768	5.08497	4.70128	5.10312	6.25368	6.54497	4.36376	6.03879	6.73694	4.82816	9.20731	5.53616
LPC(19:1)		536.371	10.1002		7.14249	0.000558897	0.347075	0.897698	0.994942	1	2.11837	0.00106158	0.680089	1.15015	0.948819	1	1.83312	0.0198169	1	1.4877	1.3355	3.1515	1.71108	2.72713	-0.211421	Positive_normalized on LPC	C27H54O7P1N1	536.371	M536T606	536.371	536.371	10.0971	10.1192	2.0694e+07	http://metlin.scripps.edu/metabo_list.php?mass_min=535.36177&mass_max=535.36499	2.04824	1.35137	1.4464	1.56508	1.03833	1.31582	1.64865	1.56594	0.982319	1.45825	4.54801	2.04682	2.36932	4.26981
LPC(19:2)		534.356	10.0991		3.66145	0.0176338	10.9506	0.679676	0.768994	1	1.62129	0.0885255	1	1.25018	0.764081	1	1.71975	0.050405	1	0.140292	0.0953529	0.227454	0.17539	0.241267	-0.17491	Positive_normalized on LPC	C27H52O7P1N1	534.355	M534T606	534.355	534.356	10.0792	10.1192	1.73941e+06	http://metlin.scripps.edu/metabo_list.php?mass_min=533.34611&mass_max=533.34932	0.205805	0.0904096	0.149557	0.12659	0.0999118	0.177881	0.131887	0.109488	0.0645771	0.111993	0.295272	0.143902	0.202038	0.295019
LPC(20:0)		552.402	10.0798		1.25335	0.314403	195.244	0.995833	1	1	1.25372	0.352183	1	1.24612	0.378392	1	1.01716	0.999923	1	4.07868	4.06168	5.11354	5.08251	4.14866	0.0845907	Positive_normalized on LPC	C28H58O7P1N1	552.402	M552T605	552.402	552.402	10.0623	10.0837	4.31482e+07	http://metlin.scripps.edu/metabo_list.php?mass_min=551.39286&mass_max=551.39618	5.73394	3.88959	3.70982	3.68751	3.51267	3.37679	4.64045	4.73612	3.17035	4.27858	4.69815	3.83564	7.6955	4.28477
LPC(20:1)		550.387	10.0822		13.0408	7.19546e-06	0.00446838	0.911542	0.994357	1	2.30961	1.38417e-05	0.0101837	1.11292	0.964888	1	1.80636	0.00659392	1	3.54859	3.23468	8.19585	3.9493	6.41002	0.0484461	Positive_normalized on LPC	C28H56O7P1N1	550.387	M550T605	550.387	550.387	10.0642	10.1002	5.07053e+07	http://metlin.scripps.edu/metabo_list.php?mass_min=549.37724&mass_max=549.38054	4.30341	3.19119	3.3503	3.81108	2.61653	3.28194	4.28566	3.78866	2.54098	3.37441	10.955	5.74176	6.66387	10.6999
LPC(20:2)		548.371	10.0821		15.9364	1.32275e-06	0.000821428	1.00981	1	1	3.43167	1.34975e-06	0.00309079	1.25849	0.902058	1	2.67827	0.000801363	0.489234	1.23311	1.2452	4.23161	1.55185	3.3026	-0.0244358	Positive_normalized on LPC	C28H54O7P1N1	548.371	M548T605	548.371	548.371	10.0642	10.1002	2.34919e+07	http://metlin.scripps.edu/metabo_list.php?mass_min=547.36164&mass_max=547.36493	1.73352	1.17863	1.36802	1.07291	0.771557	1.11296	1.39413	1.53083	0.864401	1.34037	6.40162	2.64646	3.41918	4.64106
LPC(21:0)		566.418	10.0464		1.41482	0.258049	160.248	1.01792	0.999996	1	1.38565	0.49524	1	1.54707	0.205291	1	1.03036	0.999926	1	0.209856	0.213617	0.290788	0.324661	0.216227	-0.129247	Positive_normalized on LPC	C29H60O7P1N1	566.418	M566T603	566.418	566.418	10.0286	10.066	2.42127e+06	http://metlin.scripps.edu/metabo_list.php?mass_min=565.40859&mass_max=565.41199	0.357279	0.166599	0.200774	0.203353	0.141768	0.17606	0.223157	0.251462	0.160184	0.229203	0.240508	0.198947	0.546806	0.229412
LPC(21:1)		564.402	10.0641		2.98892	0.0381071	23.6645	0.744388	0.829334	1	1.63364	0.0437175	1	1.24955	0.691753	1	1.37656	0.383381	1	0.258314	0.192286	0.421992	0.322776	0.355586	-0.129822	Positive_normalized on LPC	C29H58O7P1N1	564.402	M564T604_2	564.402	564.403	10.0429	10.08	3.04407e+06	http://metlin.scripps.edu/metabo_list.php?mass_min=563.39294&mass_max=563.39633	0.248727	0.201637	0.258126	0.266144	0.222977	0.238478	0.372112	0.209663	0.159242	0.207954	0.551919	0.278539	0.317459	0.606373
LPC(21:2)		562.387	10.0463		13.3458	5.95355e-06	0.00369715	0.743581	0.964797	1	3.398	7.8962e-06	0.00621758	1.323	0.835171	1	2.24437	0.0181566	1	0.0332224	0.0247035	0.11289	0.0439532	0.0745635	0.154101	Positive_normalized on LPC	C29H56O7P1N1	562.387	M562T603	562.386	562.387	10.0247	10.0819	594309	http://metlin.scripps.edu/metabo_list.php?mass_min=561.37715&mass_max=561.38052	0.035115	0.0368355	0.0176146	0.035745	0.0414968	0.0402153	0.0255344	0.0227074	0.0263582	0.025045	0.157998	0.0614307	0.105509	0.141355
LPC(22:0)		580.434	10.0285		1.27172	0.307447	190.924	0.89383	0.998969	1	1.61207	0.41446	1	1.66324	0.344768	1	1.07062	0.999516	1	1.90008	1.69835	3.06307	3.16029	2.03427	0.0290405	Positive_normalized on LPC	C30H62O7P1N1	580.434	M580T602	580.434	580.434	10.0111	10.0436	2.32407e+07	http://metlin.scripps.edu/metabo_list.php?mass_min=579.42411&mass_max=579.42759	3.52084	1.44559	1.67756	1.9128	1.30844	1.4927	1.94266	2.04734	1.05535	1.99236	2.29792	1.68026	7.01031	2.42401
LPC(22:1)		578.418	10.0288		20.8071	1.1771e-07	7.3098e-05	0.977707	0.999991	1	3.25461	4.93892e-08	3.97398e-05	1.22596	0.853642	1	1.84002	0.0308396	1	0.64964	0.635158	2.11433	0.79643	1.19535	-0.0747001	Positive_normalized on LPC	C30H60O7P1N1	578.418	M578T602	578.418	578.418	10.0243	10.047	1.10312e+07	http://metlin.scripps.edu/metabo_list.php?mass_min=577.40853&mass_max=577.412	0.821583	0.562277	0.598883	0.67067	0.474856	0.580204	0.83901	0.780811	0.404328	0.720334	2.44412	1.19472	2.69168	2.3063
LPC(22:2)		576.402	10.0288		28.063	6.38832e-09	3.96714e-06	0.909007	0.999679	1	5.20151	1.88158e-09	5.43401e-07	1.18694	0.986212	1	3.18714	0.000605395	0.399	0.123514	0.112275	0.642459	0.146603	0.393656	0.0810685	Positive_normalized on LPC	C30H58O7P1N1	576.402	M576T602	576.402	576.402	10.0104	10.0465	2.97536e+06	http://metlin.scripps.edu/metabo_list.php?mass_min=575.39279&mass_max=575.39625	0.155685	0.0935426	0.113578	0.1251	0.065165	0.136468	0.17506	0.13373	0.0724429	0.130652	0.970778	0.331087	0.588568	0.727532
LPC(22:4)		572.371	10.0106		13.9725	4.06911e-06	0.00252691	1.17331	0.998898	1	5.16428	3.90034e-06	0.00221956	1.09917	0.999665	1	3.05457	0.0226966	1	1.28722	1.51031	6.64759	1.41488	3.93192	0.465782	Positive_normalized on LPC	C30H54O7P1N1	572.371	M572T601_2	572.369	572.371	9.9894	10.1567	3.08495e+07	http://metlin.scripps.edu/metabo_list.php?mass_min=571.36128&mass_max=571.36471	2.29399	1.75124	1.58673	0.766166	0.696164	1.29662	0.619656	2.32087	0.692075	1.51798	10.8697	3.08923	7.83902	4.068
LPC(22:5)		570.355	10.0243		4.20503	0.00970677	6.0279	0.617703	0.361458	1	1.50236	0.0453069	1	0.933223	0.990518	1	1.05905	0.994857	1	4.6985	2.90228	7.05885	4.38474	4.97595	0.186789	Positive_normalized on LPC	C30H52O7P1N1	570.355	M570T601	570.355	570.355	10.0065	10.0436	4.77182e+07	http://metlin.scripps.edu/metabo_list.php?mass_min=569.3458&mass_max=569.34922	7.45982	4.88503	4.61486	4.204	3.89854	3.97776	3.84947	3.76934	1.96154	2.97596	10.6634	4.11151	5.83577	7.10142
LPC(22:6)		568.34	10.0259		1.60311	0.204605	127.06	0.532518	0.384499	1	1.16698	0.89711	1	1.03013	0.999822	1	1.28694	0.618186	1	3.65886	1.94841	4.26982	3.76908	4.70874	0.204934	Positive_normalized on LPC	C30H50O7P1N1	568.34	M568T602_1	568.339	568.34	10.0065	10.0439	3.59721e+07	http://metlin.scripps.edu/metabo_list.php?mass_min=567.33015&mass_max=567.33356	5.88227	3.03741	2.60778	3.55754	3.4029	3.53105	3.59306	2.39295	1.5444	1.90788	5.56008	2.59734	3.18315	6.18701
LPC(23:0)		594.449	10.0073		3.06978	0.0346711	21.5308	0.936367	0.999969	1	2.79014	0.0220634	1	2.29283	0.130663	1	1.61971	0.734383	1	0.312893	0.292983	0.873016	0.717411	0.506797	-0.0892926	Positive_normalized on LPC	C31H64O7P1N1	594.449	M594T600_2	594.449	594.449	9.9927	10.0116	5.43792e+06	http://metlin.scripps.edu/metabo_list.php?mass_min=593.43979&mass_max=593.44335	0.592796	0.23859	0.243863	0.297842	0.21694	0.246685	0.353536	0.362965	0.150676	0.365307	0.729623	0.489119	1.84985	0.743843
LPC(23:1)		592.434	10.0106		11.8594	1.54106e-05	0.00956998	0.979598	1	1	4.79016	1.36755e-05	0.0210437	1.19322	0.99493	1	1.9851	0.419462	1	0.0786075	0.0770037	0.376542	0.093796	0.156044	-0.0728249	Positive_normalized on LPC	C31H62O7P1N1	592.434	M592T601	592.433	592.434	9.9894	10.0305	1.65111e+06	http://metlin.scripps.edu/metabo_list.php?mass_min=591.42414&mass_max=591.42769	0.0727575	0.0399519	0.0319438	0.0733672	0.0326491	0.195914	0.103669	0.106796	0.0347263	0.0894885	0.341343	0.166176	0.684696	0.385124
LPC(23:2)		590.418	10.0067		8.97825	0.000122486	0.0760637	1.10509	0.964053	1	0.270079	0.000392816	0.234187	1.09541	0.938524	1	0.724756	0.312818	1	0.268267	0.29646	0.0724531	0.293862	0.194428	0.367184	Positive_normalized on LPC	C31H60O7P1N1	590.418	M590T600_2	590.418	590.418	9.989	10.0288	1.97239e+06	http://metlin.scripps.edu/metabo_list.php?mass_min=589.40823&mass_max=589.41177	0.250112	0.274123	0.280324	0.244053	0.250386	0.286756	0.292114	0.296254	0.289905	0.303221	0.0531287	0.0189587	0.251581	0.0713752
LPC(23:3)		588.402	10.0073		4.15745	0.010218	6.34539	0.650985	0.71095	1	0.358068	0.0732344	1	1.04221	0.999554	1	0.152053	0.0166783	1	0.26336	0.171443	0.094301	0.274478	0.0400448	0.691241	Positive_normalized on LPC	C31H58O7P1N1	588.402	M588T600	588.4	588.403	9.9574	10.0645	1.47922e+06	http://metlin.scripps.edu/metabo_list.php?mass_min=587.3924&mass_max=587.39593	0.0380372	0.328317	0.406978	0.295708	0.336672	0.389963	0.0478478	0.0110168	0.211608	0.291706	0.170109	0.0438306	0.13988	0.0511989
LPC(24:0)		608.465	9.9752		6.46962	0.00102172	0.634485	0.869639	0.999597	1	3.96812	0.000479995	0.234684	2.47876	0.0999699	1	2.27639	0.209994	1	5.35463	4.65659	21.2478	13.2728	12.1892	0.258	Positive_normalized on LPC	C32H66O7P1N1	608.465	M608T599_2	608.465	608.465	9.9701	9.993	1.16208e+08	http://metlin.scripps.edu/metabo_list.php?mass_min=607.45518&mass_max=607.45883	9.97038	3.392	3.95782	4.3541	3.3498	4.19521	8.26308	5.76842	2.53792	5.66344	19.4763	11.7045	41.9244	18.6857
LPC(24:1)		606.449	9.9928		11.6217	1.80641e-05	0.0112178	1.53164	0.99695	1	10.5351	9.05796e-06	0.00763802	2.3104	0.830528	1	4.22916	0.181994	1	1.89073	2.89591	19.919	4.36833	7.99618	0.093858	Positive_normalized on LPC	C32H64O7P1N1	606.449	M606T600	606.449	606.449	9.9879	10.0072	7.99696e+07	http://metlin.scripps.edu/metabo_list.php?mass_min=605.43964&mass_max=605.44328	3.01122	1.47158	1.45258	1.91234	1.00845	1.7258	2.65311	3.87152	1.15491	3.6613	18.403	7.57189	41.5531	18.791
LPC(24:2)		604.434	9.9926		39.4643	1.8595e-10	1.15475e-07	1.78178	0.976051	1	15.3571	1.46261e-12	4.21225e-09	1.71214	0.95778	1	6.68163	0.00138475	0.861916	0.0898746	0.160137	1.38021	0.153877	0.600508	0.143698	Positive_normalized on LPC	C32H62O7P1N1	604.434	M604T600	604.432	604.434	9.9701	10.0984	5.20973e+06	http://metlin.scripps.edu/metabo_list.php?mass_min=603.42397&mass_max=603.4276	0.0949051	0.066363	0.0812978	0.0779249	0.0528626	0.0685755	0.187193	0.200295	0.0712784	0.208838	1.42801	0.637028	1.92792	1.42004
LPC(24:3)		602.417	9.9899		29.3044	4.12579e-09	2.56211e-06	0.831238	0.999512	1	8.34529	8.25737e-10	4.80638e-07	1.65315	0.839244	1	4.52415	0.000961024	0.583333	0.188972	0.157081	1.57703	0.312401	0.854939	1.57165	Positive_normalized on LPC	C32H60O7P1N1	602.418	M602T599	602.416	602.418	9.9391	10.1161	6.65816e+06	http://metlin.scripps.edu/metabo_list.php?mass_min=601.40746&mass_max=601.41108	0.113418	0.175763	0.263747	0.248305	0.154692	0.266703	0.100178	0.230624	0.0960257	0.144593	2.04508	1.01801	1.42207	1.28513
LPC(24:4)		600.402	9.9892		13.1081	6.89922e-06	0.00428442	1.76828	0.981282	1	9.65155	9.80262e-06	0.00466962	1.48834	0.990949	1	5.39465	0.0200308	1	0.363492	0.642754	3.50826	0.541001	1.96091	0.011206	Positive_normalized on LPC	C32H58O7P1N1	600.402	M600T599	600.402	600.403	9.9531	9.9948	1.47851e+07	http://metlin.scripps.edu/metabo_list.php?mass_min=599.39276&mass_max=599.39636	0.551316	0.374056	0.607021	0.137543	0.20178	0.103503	0.569225	0.921825	0.249084	0.757352	5.23845	2.10731	1.77899	1.86941
LPC(24:5)		598.387	9.99		10.5482	3.79868e-05	0.0235898	1.04905	0.999994	1	4.2699	0.000324744	0.183829	1.0392	0.999993	1	3.96322	0.00143665	0.827836	0.472753	0.495943	2.01861	0.491286	1.87362	-0.0891328	Positive_normalized on LPC	C32H56O7P1N1	598.387	M598T599	598.387	598.387	9.9701	10.0109	1.09895e+07	http://metlin.scripps.edu/metabo_list.php?mass_min=597.37718&mass_max=597.38077	0.573878	0.507632	0.665066	0.375718	0.342919	0.24809	0.595972	0.599095	0.295474	0.59326	3.01321	1.22872	1.12432	1.8505
LPC(24:6)		596.371	9.9893		4.87657	0.00479138	2.97545	0.670471	0.999054	1	4.14279	0.0808151	1	0.761173	0.999271	1	5.43478	0.0117367	1	0.127428	0.0854368	0.527907	0.0969947	0.692544	0.59795	Positive_normalized on LPC	C32H54O7P1N1	596.371	M596T599_1	596.369	596.371	9.9336	10.0984	3.15975e+06	http://metlin.scripps.edu/metabo_list.php?mass_min=595.36112&mass_max=595.3647	0.188155	0.151783	0.11232	0.059842	0.106993	0.173263	0.0996384	0.127265	0.0348727	0.0941731	0.873911	0.179755	0.472504	0.909304
LPC(25:0)		622.481	9.9573		16.2495	1.11567e-06	0.000692832	1.59675	0.99363	1	11.8692	4.99446e-07	5.43358e-05	5.44836	0.0181822	1	6.69777	0.00322314	1	0.393033	0.627577	4.66498	2.14139	2.63245	0.0916464	Positive_normalized on LPC	C33H68O7P1N1	622.481	M622T597_2	622.48	622.481	9.9215	9.9751	2.18692e+07	http://metlin.scripps.edu/metabo_list.php?mass_min=621.47089&mass_max=621.47463	0.717296	0.30986	0.214	0.250802	0.227922	0.25074	0.780613	0.767531	0.391485	0.723716	4.89985	2.90896	7.92793	4.41595
LPC(25:1)		620.465	9.9749		12.1673	1.25805e-05	0.0078125	1.96648	0.996122	1	17.6068	7.8162e-06	0.00334828	3.18722	0.841131	1	7.54945	0.0883975	1	0.328591	0.646168	5.78542	1.04729	2.48068	0.0273732	Positive_normalized on LPC	C33H66O7P1N1	620.465	M620T598	620.465	620.465	9.9571	9.9894	2.24063e+07	http://metlin.scripps.edu/metabo_list.php?mass_min=619.45529&mass_max=619.45902	0.557306	0.237927	0.219108	0.319761	0.115782	0.271212	0.579038	0.860163	0.272682	0.805659	5.55774	2.3616	12.4347	5.41953
LPC(25:2)		618.449	9.9713		14.3232	3.30449e-06	0.00205209	1.87328	0.996923	1	17.897	2.0758e-06	0.00224889	2.17024	0.976212	1	7.3602	0.0835035	1	0.0226248	0.0423824	0.404916	0.0491011	0.166523	0.0920368	Positive_normalized on LPC	C33H64O7P1N1	618.449	M618T598	618.449	618.449	9.9538	9.9892	1.51587e+06	http://metlin.scripps.edu/metabo_list.php?mass_min=617.4396&mass_max=617.44331	0.0337066	0.00974142	0.0152664	0.0182691	0.0194125	0.0452258	0.0167516	0.0631335	0.00858699	0.0554268	0.334912	0.16469	0.794577	0.397665
LPC(26:0)		636.496	9.9394		20.3308	1.46254e-07	9.08234e-05	2.88072	0.923628	1	18.8485	1.84458e-08	4.70898e-05	10.3227	0.00139043	0.843544	15.8239	2.92836e-06	0.00297659	3.09397	8.91286	58.3168	31.9382	48.9586	0.41966	Positive_normalized on LPC	C34H70O7P1N1	636.496	M636T596	636.496	636.496	9.9214	9.9531	3.08768e+08	http://metlin.scripps.edu/metabo_list.php?mass_min=635.48629&mass_max=635.4901	4.80549	1.87138	2.08014	1.43603	1.5456	1.50964	8.40948	10.4809	6.17386	10.0838	64.6828	42.9111	81.437	54.6886
LPC(26:1)		634.48	9.9533		15.8015	1.42453e-06	0.000884631	3.08209	0.965622	1	22.6613	1.41994e-06	0.000458355	5.75317	0.407272	1	17.0241	0.000296296	0.127473	3.04304	9.37893	68.9592	17.5071	51.8051	0.231761	Positive_normalized on LPC	C34H68O7P1N1	634.481	M634T597_2	634.48	634.481	9.939	9.9598	3.17528e+08	http://metlin.scripps.edu/metabo_list.php?mass_min=633.47077&mass_max=633.47457	5.02801	2.02571	2.16197	1.90373	1.42664	2.0336	6.72162	15.2863	5.59857	7.25195	73.3298	35.2682	126.78	64.8023
LPC(26:2)		632.465	9.9553		17.8167	4.91672e-07	0.000305329	4.76422	0.873092	1	29.2274	5.48015e-07	5.59142e-05	3.58068	0.912531	1	16.5666	0.00244746	1	0.510827	2.43369	14.9302	1.82911	8.46268	0.0110427	Positive_normalized on LPC	C34H66O7P1N1	632.465	M632T597	632.465	632.465	9.9392	9.971	6.01393e+07	http://metlin.scripps.edu/metabo_list.php?mass_min=631.45527&mass_max=631.45906	0.793515	0.385907	0.396967	0.410662	0.223517	0.305996	1.05923	3.27854	0.826306	3.19624	15.4232	6.46345	26.0423	13.9196
LPC(26:3)		630.448	9.9731		11.7763	1.62872e-05	0.0101144	2.22454	0.979346	1	14.0654	9.68971e-06	0.00515872	2.21338	0.951143	1	6.70281	0.0607833	1	0.608397	1.3534	8.55734	1.34661	4.07797	2.34265	Positive_normalized on LPC	C34H64O7P1N1	630.449	M630T598	630.447	630.449	9.8855	10.098	3.41199e+07	http://metlin.scripps.edu/metabo_list.php?mass_min=629.43815&mass_max=629.44194	1.10128	0.352026	0.462804	0.456545	0.392038	0.580212	0.913872	1.9095	0.263417	1.88729	7.48378	3.81157	13.7955	4.95082
LPC(26:4)		628.432	9.9751		6.92416	0.00067772	0.420864	5.05796	0.944008	1	25.7297	0.000387606	0.234248	2.00122	0.999207	1	10.5012	0.297689	1	0.223435	1.13013	5.74891	0.447142	2.34633	1.93633	Positive_normalized on LPC	C34H62O7P1N1	628.434	M628T599	628.431	628.434	9.9035	10.1181	2.10317e+07	http://metlin.scripps.edu/metabo_list.php?mass_min=627.42277&mass_max=627.42654	0.14317	0.210758	0.128204	0.110822	0.149467	0.277221	0.544401	1.5734	0.315539	1.50144	4.39454	2.84024	5.72879	2.12339
LPC(26:5)		626.418	9.9569		17.6154	5.44644e-07	0.000338224	3.08483	0.860642	1	14.8025	6.41061e-07	0.00105713	1.12901	0.99999	1	11.0035	0.000388912	0.234647	0.0955166	0.294652	1.41389	0.107839	1.05102	0.0108428	Positive_normalized on LPC	C34H60O7P1N1	626.418	M626T597	626.417	626.418	9.9044	9.971	6.23545e+06	http://metlin.scripps.edu/metabo_list.php?mass_min=625.40833&mass_max=625.41209	0.0976383	0.0962919	0.119927	0.0284685	0.0209761	0.0318203	0.273494	0.395543	0.110026	0.378388	1.56787	0.881551	1.59717	1.16939
LPC(26:6)		624.402	9.9654		3.73948	0.0161624	10.0369	0.715488	0.999677	1	4.94001	0.047545	1	0.821183	0.999859	1	4.72034	0.0800882	1	0.0743347	0.0531856	0.367215	0.0610424	0.350885	0.635373	Positive_normalized on LPC	C34H58O7P1N1	624.402	M624T598	624.4	624.403	9.9171	10.0622	1.89103e+06	http://metlin.scripps.edu/metabo_list.php?mass_min=623.3923&mass_max=623.39605	0.134542	0.0193112	0.0545548	0.0979645	0.0425877	0.0960999	0.0752826	0.069345	0.016522	0.0736899	0.448453	0.194017	0.262731	0.736763
LPC(27:0)		650.512	9.9289		8.45933	0.000184844	0.114788	0.154598	0.0233802	1	1.63482	0.0285925	1	0.694878	0.474737	1	1.17397	0.87319	1	1.91522	0.296089	3.13105	1.33085	2.24841	0.441462	Positive_normalized on LPC	C35H72O7P1N1	650.512	M651T596_2	650.512	650.512	9.9035	9.9712	1.88001e+07	http://metlin.scripps.edu/metabo_list.php?mass_min=649.50188&mass_max=649.50578	2.23561	2.49847	2.40277	1.66447	2.22069	2.32977	0.0547731	0.358082	0.18651	0.343676	3.77019	2.54995	3.90365	2.81657
LPC(27:1)		648.497	9.9569		9.05364	0.000115502	0.0717265	0.0378299	0.00145555	0.907216	0.171976	0.000418084	0.301132	0.0555118	8.34923e-05	0.08991	0.204448	0.00106319	0.694668	28.18	1.06605	4.8463	1.56432	5.76136	-0.821729	Positive_normalized on LPC	C35H70O7P1N1	648.496	M648T597_2	648.496	648.498	9.8678	10.0076	8.85874e+07	http://metlin.scripps.edu/metabo_list.php?mass_min=647.48706&mass_max=647.49095	0.0913993	39.8517	35.0037	42.0279	41.4665	38.5384	0.280367	1.40306	0.408082	1.387	5.84094	3.27447	5.98898	5.44897
LPC(27:2)		646.481	9.9393		15.5468	1.64025e-06	0.00101859	5.62136	0.803721	1	28.2359	1.83385e-06	0.000917961	3.09708	0.962944	1	17.9156	0.00187477	1	0.0280199	0.15751	0.791167	0.0867798	0.501993	-0.174718	Positive_normalized on LPC	C35H68O7P1N1	646.481	M646T596	646.48	646.481	9.9167	9.9572	3.30217e+06	http://metlin.scripps.edu/metabo_list.php?mass_min=645.471&mass_max=645.47487	0.0265346	0.0291408	0.0318146	0.0207552	0.0295647	0.0139889	0.0443402	0.207636	0.0461011	0.218793	0.806718	0.355826	1.45988	0.708398
LPC(28:0)		664.527	9.9034		21.847	7.42026e-08	4.60798e-05	2.03825	0.987211	1	17.5578	2.3139e-08	3.86465e-05	6.07617	0.0760931	1	14.3837	8.31019e-06	0.00380876	1.00003	2.03831	17.5583	6.07634	14.3841	0.868647	Positive_normalized on LPC	C36H74O7P1N1	664.528	M665T594	664.527	664.527	9.8857	9.9167	8.53006e+07	http://metlin.scripps.edu/metabo_list.php?mass_min=663.5172&mass_max=663.52118	0.179762	1.26726	1.26185	1.32463	1.37281	1.23167	0.362205	2.35006	1.45793	2.30693	21.6198	14.839	20.5982	14.5403
LPC(28:1)		662.512	9.9167		17.4134	6.0404e-07	0.000375109	16.4265	0.583431	1	55.2781	6.9368e-05	0.0188509	20.8055	0.170709	1	76.0036	1.93781e-07	0.000335762	0.388237	6.37737	21.461	8.07748	29.5074	0.614594	Positive_normalized on LPC	C36H72O7P1N1	662.512	M663T595	662.511	662.512	9.9034	9.9245	1.31232e+08	http://metlin.scripps.edu/metabo_list.php?mass_min=661.50172&mass_max=661.50569	0.569772	0.213515	0.212604	0.152539	0.171509	0.387145	1.01058	7.84224	3.69223	7.59764	26.7362	16.5843	24.9997	20.483
LPC(28:2)		660.496	9.9211		13.5613	5.21649e-06	0.00323944	22.6558	0.345955	1	53.4452	0.000132149	0.0966517	12.0319	0.694926	1	68.1691	9.69522e-06	0.008317	0.0812803	1.84147	4.34404	0.977953	5.54081	0.555813	Positive_normalized on LPC	C36H70O7P1N1	660.496	M660T595	660.496	660.496	9.9034	9.9573	2.51814e+07	http://metlin.scripps.edu/metabo_list.php?mass_min=659.48612&mass_max=659.49008	0.120491	0.0338515	0.0796023	0.0268256	0.0171516	0.0297061	0.261334	2.38013	0.759131	2.38514	4.8913	2.51888	5.85619	3.85821
LPC(29:0)		678.543	9.886		6.07275	0.00147765	0.917622	1.27817	0.388175	1	0.757227	0.287499	1	0.902472	0.904217	1	0.459666	0.00438884	1	1.02446	1.30944	0.775749	0.924546	0.47091	0.55605	Positive_normalized on LPC	C37H76O7P1N1	678.543	M679T593_2	678.543	678.543	9.8678	9.9154	7.88632e+06	http://metlin.scripps.edu/metabo_list.php?mass_min=677.53301&mass_max=677.53708	0.864268	1.0333	1.05657	0.973623	0.966568	1.24159	1.0353	1.53306	1.17863	1.21662	1.00156	0.722893	0.929418	0.623742
LPC(29:1)		676.527	9.9032		49.9126	1.45719e-11	9.04915e-09	0.071209	6.876e-11	4.18199e-09	0.252768	4.03079e-10	2.51578e-07	0.110186	6.66134e-16	9.3441e-10	0.416416	1.7644e-07	6.8478e-05	5.12354	0.364842	1.29507	0.564542	2.13353	0.188078	Positive_normalized on LPC	C37H74O7P1N1	676.528	M677T594	676.527	676.528	9.8857	9.9167	1.98497e+07	http://metlin.scripps.edu/metabo_list.php?mass_min=675.51761&mass_max=675.52167	5.15181	5.46735	6.61762	3.81306	4.67426	4.75998	5.38074	0.426814	0.21379	0.453923	1.63995	1.2254	1.17064	1.30929
LPC(29:2)		674.512	9.9068		1.66087	0.190513	118.309	1.03756	1	1	3.84155	0.168808	1	3.51981	0.253349	1	3.47415	0.299385	1	0.0332022	0.0344492	0.127548	0.116865	0.115349	0.351626	Positive_normalized on LPC	C37H72O7P1N1	674.512	M675T594	674.511	674.512	9.8855	9.9708	826218	http://metlin.scripps.edu/metabo_list.php?mass_min=673.50185&mass_max=673.5059	0.0466383	0.0182628	0.0305663	0.0183905	0.0205267	0.0394075	0.058623	0.0178544	0.0574067	0.0280865	0.103196	0.0186202	0.090346	0.0793325
LPC(30:0)		692.558	9.8681		21.6996	7.91384e-08	4.9145e-05	1.87578	0.993743	1	17.6222	4.85203e-08	4.4413e-05	3.35266	0.66242	1	12.7095	7.69326e-05	0.0544431	0.198374	0.372106	3.49579	0.665081	2.52124	0.617086	Positive_normalized on LPC	C38H78O7P1N1	692.559	M693T592	692.558	692.559	9.85	9.8803	1.53532e+07	http://metlin.scripps.edu/metabo_list.php?mass_min=691.54856&mass_max=691.55271	0.23929	0.193798	0.143652	0.230388	0.188732	0.188935	0.203824	0.392887	0.334113	0.389316	4.50826	2.89555	4.40493	2.68809
LPC(30:1)		690.543	9.8853		12.6853	9.00601e-06	0.00559273	5.71918	0.923472	1	22.6596	0.00305631	1	7.66969	0.613575	1	38.5896	3.44211e-06	0.00366793	0.150671	0.861714	3.41414	1.1556	5.81433	0.372611	Positive_normalized on LPC	C38H76O7P1N1	690.543	M691T593	690.543	690.543	9.8676	9.9037	2.28538e+07	http://metlin.scripps.edu/metabo_list.php?mass_min=689.53309&mass_max=689.53723	0.118521	0.184659	0.143438	0.123352	0.141888	0.168633	0.174203	0.993652	0.574118	1.01737	4.52	3.19736	2.82508	3.22331
LPC(30:2)		688.527	9.8892		12.4763	1.02951e-05	0.00639325	13.0951	0.400231	1	22.7741	0.00659734	1	13.4086	0.178401	1	45.0942	6.84907e-07	0.000307184	0.0500836	0.655848	1.14061	0.671551	2.25848	0.489799	Positive_normalized on LPC	C38H74O7P1N1	688.528	M689T593	688.527	688.527	9.8678	9.9047	9.15514e+06	http://metlin.scripps.edu/metabo_list.php?mass_min=687.51737&mass_max=687.5215	0.044971	0.052725	0.0662508	0.0330924	0.0366459	0.0440836	0.0728163	0.802911	0.362712	0.80192	1.28486	1.15696	0.722779	1.06411
LPC(30:5)		682.479	9.9166		4.10237	0.010846	6.73534	0.224843	0.00983368	1	0.641407	0.180578	1	0.416671	0.0124681	1	0.773754	0.59217	1	1.0749	0.241684	0.689449	0.44788	0.831709	2.89686	Positive_normalized on LPC	C38H68O7P1N1	682.481	M682T595	682.478	682.48	9.8857	9.9567	6.71331e+06	http://metlin.scripps.edu/metabo_list.php?mass_min=681.46879&mass_max=681.47289	0.948208	1.0864	0.986033	1.02427	1.13067	0.992892	1.35584	0.33118	0.0295296	0.364344	0.751992	0.363337	0.995144	0.577378
LPC(30:6)		680.463	9.9165		10.8675	3.03137e-05	0.0188248	0.3516	0.0358071	1	0.0395515	5.46449e-05	0.0375195	1.01962	0.999906	1	0.393956	0.0126832	1	9.79296	3.44321	0.387326	9.98512	3.85799	2.30281	Positive_normalized on LPC	C38H66O7P1N1	680.465	M680T595	680.463	680.465	9.8674	9.9514	5.09025e+07	http://metlin.scripps.edu/metabo_list.php?mass_min=679.45356&mass_max=679.45765	7.43878	10.416	9.10029	8.35626	10.8066	9.44677	12.986	0.0839399	10.0409	0.204783	0.39691	0.179888	0.355991	0.365566
LPC(32:0)		720.589	9.8428		5.93054	0.00169074	1.04995	0.779998	0.847828	1	0.308174	0.0111719	1	1.20078	0.76285	1	0.465358	0.0754754	1	4.87723	3.80423	1.50304	5.85649	2.26966	1.09285	Positive_normalized on LPC	C40H82O7P1N1	720.59	M721T591	720.589	720.59	9.8143	9.8496	3.35639e+07	http://metlin.scripps.edu/metabo_list.php?mass_min=719.57942&mass_max=719.58374	6.88952	5.42898	2.25885	3.5824	4.26562	4.16103	7.5542	0.0538837	5.03441	6.32439	1.61185	0.972767	1.45069	3.23171
LPC(32:3)		714.542	9.8684		8.6884	0.000153891	0.0955664	15.072	0.0407325	1	20.006	0.000231762	0.215397	13.6102	0.0154178	1	23.3202	5.41273e-05	0.0292948	0.0261036	0.393434	0.522228	0.355275	0.608742	1.32575	Positive_normalized on LPC	C40H76O7P1N1	714.543	M715T592	714.541	714.543	9.85	9.8892	3.58977e+06	http://metlin.scripps.edu/metabo_list.php?mass_min=713.53233&mass_max=713.53662	0.0584376	0.0250693	0.0160354	0.00632885	0.0188901	0.0290166	0.0289472	0.433525	0.268059	0.478718	0.597351	0.540993	0.416234	0.355071
LPC(32:4)		712.526	9.8859		3.44714	0.022456	13.9451	1.46183	0.884971	1	1.64575	0.513063	1	0.730551	0.95378	1	2.46771	0.0276079	1	0.332704	0.486356	0.547547	0.243057	0.821018	2.57848	Positive_normalized on LPC	C40H74O7P1N1	712.528	M713T593	712.525	712.527	9.85	9.8986	4.56093e+06	http://metlin.scripps.edu/metabo_list.php?mass_min=711.51579&mass_max=711.52007	0.29672	0.440887	0.406706	0.225596	0.333717	0.330459	0.294843	0.591769	0.243016	0.624284	0.607142	0.512371	0.385022	0.382416
LPC(32:5)		710.511	9.8835		16.0842	1.22028e-06	0.000757797	149.019	0.00400364	1	176.208	2.26365e-05	0.0150294	39.3268	0.573381	1	213.827	3.37041e-06	0.00248716	0.0018439	0.274776	0.324911	0.0725148	0.394277	1.17827	Positive_normalized on LPC	C40H72O7P1N1	710.512	M711T593	710.51	710.512	9.8325	9.9217	1.98333e+06	http://metlin.scripps.edu/metabo_list.php?mass_min=709.50115&mass_max=709.50541	0.00364974	0	0.00346318	0.00316172	0	0	0.00263269	0.351464	0.0980622	0.374802	0.285768	0.21792	0.328581	0.339036
LPC(32:6)		708.496	9.8786		13.3206	6.0471e-06	0.00375525	4.01926	0.00344628	1	4.17166	0.000122445	0.0532142	1.26755	0.980853	1	4.41747	5.52733e-05	0.0353984	0.0392672	0.157825	0.163809	0.0497732	0.173462	1.04039	Positive_normalized on LPC	C40H70O7P1N1	708.496	M708T593	708.495	708.496	9.8439	9.9227	1.07996e+06	http://metlin.scripps.edu/metabo_list.php?mass_min=707.4856&mass_max=707.48985	0.0171983	0.0225043	0.0236538	0.0341228	0.0568399	0.0724934	0.048058	0.180659	0.0765798	0.216236	0.118065	0.139522	0.221358	0.227753
LPC(34:0)		748.621	9.808		11.8232	1.57859e-05	0.00980302	0.735482	0.90281	1	2.63389	3.56043e-05	0.0319124	1.03166	0.99991	1	1.76613	0.0665894	1	0.156163	0.114855	0.411315	0.161107	0.275804	0.197195	Positive_normalized on LPC	C42H86O7P1N1	748.621	M749T588	748.621	748.621	9.7965	9.8259	2.28011e+06	http://metlin.scripps.edu/metabo_list.php?mass_min=747.61127&mass_max=747.61576	0.19576	0.181402	0.104999	0.0973793	0.117386	0.165991	0.230221	0.12486	0.0817306	0.137974	0.654229	0.357191	0.462876	0.341792
LPC(34:3)		742.573	9.844		5.64696	0.00222067	1.37904	0.840886	0.859156	1	0.352578	0.0014333	0.873083	0.970036	0.999126	1	0.661437	0.154486	1	0.339994	0.285897	0.119874	0.329807	0.224885	2.42054	Positive_normalized on LPC	C42H80O7P1N1	742.575	M743T591	742.572	742.573	9.8239	9.8634	2.37482e+06	http://metlin.scripps.edu/metabo_list.php?mass_min=741.56269&mass_max=741.56715	0.453881	0.36211	0.215426	0.187338	0.283391	0.41671	0.461104	0.237999	0.250831	0.36886	0.177603	0.0724214	0.108358	0.196782
LPC(34:5)		738.543	9.8504		3.81587	0.014848	9.22061	2.99692	0.445327	1	2.66407	0.381196	1	1.58713	0.956421	1	5.08672	0.00478873	1	0.0350971	0.105183	0.0935012	0.0557038	0.178529	0.754599	Positive_normalized on LPC	C42H76O7P1N1	738.543	M739T591	738.542	738.543	9.8434	9.8681	864795	http://metlin.scripps.edu/metabo_list.php?mass_min=737.53265&mass_max=737.53708	0.0209292	0.0302035	0.015612	0.0367123	0.0363991	0.0538123	0.0520116	0.104257	0.0773817	0.133911	0.0984214	0.108408	0.030523	0.0638576
LPC(O-16:0)		480.345	10.1387		2.61976	0.0590144	36.6479	0.413585	0.0203058	1	0.757433	0.339245	1	0.772356	0.393961	1	0.922852	0.968647	1	16.6903	6.90286	12.6418	12.8909	15.4027	-0.329259	Positive_normalized on LPC	C24H50O6P1N1	480.345	M480T608	480.345	480.345	10.1341	10.4048	1.29161e+08	http://metlin.scripps.edu/metabo_list.php?mass_min=479.33577&mass_max=479.33865	17.7492	15.5256	13.7953	17.3052	15.2859	20.3849	16.7862	8.06208	4.92646	7.72004	14.8729	8.52502	8.91189	13.6537
LPC(O-17:0)		494.361	10.118		8.36387	0.000199668	0.123994	0.412786	8.78396e-05	0.0673921	0.609866	0.000685752	0.434756	0.731273	0.0195361	1	0.697861	0.0112021	1	2.94217	1.21449	1.79433	2.15153	2.05322	-0.360251	Positive_normalized on LPC	C25H52O6P1N1	494.361	M494T607	494.361	494.361	10.0984	10.1369	2.01159e+07	http://metlin.scripps.edu/metabo_list.php?mass_min=493.3514&mass_max=493.35436	2.94631	2.84946	2.50189	2.94405	2.86814	3.42787	3.05746	1.37872	0.981934	1.2828	2.28372	1.35049	1.32371	1.969
LPC(O-17:1)		492.345	10.1181		2.57944	0.0619374	38.4631	0.384471	0.0226799	1	0.652796	0.128472	1	0.763059	0.415399	1	0.684487	0.213967	1	0.287827	0.110661	0.187892	0.219629	0.197014	-0.361856	Positive_normalized on LPC	C25H50O6P1N1	492.345	M492T607	492.345	492.345	10.0998	10.1362	2.01888e+06	http://metlin.scripps.edu/metabo_list.php?mass_min=491.33576&mass_max=491.33871	0.301088	0.260806	0.260708	0.273254	0.211657	0.37399	0.333287	0.148047	0.0691563	0.11478	0.260136	0.099279	0.158279	0.149647
LPC(O-18:0)		508.376	10.1178		8.67711	0.000155279	0.0964282	0.323119	9.22331e-05	0.0749068	0.548318	0.000504242	0.332059	0.652672	0.00703343	1	0.672405	0.0156512	1	18.3498	5.92915	10.0615	11.9764	12.3385	-0.605909	Positive_normalized on LPC	C26H54O6P1N1	508.376	M508T607	508.376	508.377	10.0974	10.1345	1.17295e+08	http://metlin.scripps.edu/metabo_list.php?mass_min=507.36714&mass_max=507.37019	13.9156	16.8504	14.652	21.2267	22.191	24.4766	15.136	6.60933	5.00604	6.1721	15.1287	8.06265	6.4647	12.9144
LPC(O-18:1)		506.361	10.0823		4.59442	0.0064191	3.98626	0.256665	0.00213056	1	0.577367	0.0268668	1	0.642707	0.0722292	1	0.758913	0.352958	1	6.55801	1.68321	3.78638	4.21488	4.97696	-0.509704	Positive_normalized on LPC	C26H52O6P1N1	506.361	M506T605	506.359	506.361	10.0643	10.243	4.31686e+07	http://metlin.scripps.edu/metabo_list.php?mass_min=505.35145&mass_max=505.35448	5.24478	6.81979	5.1771	7.05906	5.4489	9.207	6.94946	1.97546	1.29303	1.78115	5.7463	2.5959	2.19862	4.18811
LPC(O-19:1)		520.376	10.0465		2.69411	0.0539967	33.5319	3.3011	0.021106	1	1.67775	0.63274	1	1.82863	0.46364	1	1.08115	0.999797	1	0.0964769	0.318479	0.161864	0.176421	0.104306	-0.149949	Positive_normalized on LPC	C27H54O6P1N1	520.376	M520T603	520.376	520.376	10.0128	10.066	1.4123e+06	http://metlin.scripps.edu/metabo_list.php?mass_min=519.36687&mass_max=519.36999	0.051298	0.0786736	0.0559567	0.303137	0.0422377	0.0749342	0.0691013	0.364565	0.34846	0.242413	0.0667199	0.248019	0.143454	0.0440394
LPC(O-20:0)		536.408	10.0107		5.50877	0.00254126	1.57812	0.639884	0.0054013	1	0.875067	0.346562	1	1.08351	0.683794	1	0.959321	0.96694	1	0.987851	0.63211	0.864436	1.07034	0.947666	-0.219799	Positive_normalized on LPC	C28H58O6P1N1	536.407	M536T601_1	536.407	536.408	9.9925	10.0287	8.7307e+06	http://metlin.scripps.edu/metabo_list.php?mass_min=535.39816&mass_max=535.40138	1.17278	0.900417	0.888191	0.91917	0.962871	0.957592	1.11394	0.683409	0.572415	0.640505	1.05343	0.75871	0.748396	1.04125
LPC(O-20:1)		534.392	10.0289		2.09307	0.111816	69.4376	0.400629	0.0308989	1	0.80827	0.613933	1	0.870813	0.856234	1	0.778068	0.525253	1	0.131686	0.0527573	0.106438	0.114674	0.102461	0.059945	Positive_normalized on LPC	C28H56O6P1N1	534.392	M534T602	534.391	534.392	9.9927	10.098	1.02008e+06	http://metlin.scripps.edu/metabo_list.php?mass_min=533.38237&mass_max=533.38558	0.121459	0.124807	0.106191	0.13341	0.151457	0.152628	0.131852	0.0417959	0.0734734	0.0430026	0.164188	0.0719017	0.189212	0.104704
LPC(O-21:0)		550.423	9.9929		0.58779	0.674484	418.855	1.91417	0.996386	1	2.73092	0.912006	1	0.770072	0.999957	1	4.3703	0.55677	1	0.299032	0.572397	0.816633	0.230276	1.30686	0.0947673	Positive_normalized on LPC	C29H60O6P1N1	550.423	M550T600	550.423	550.423	9.971	10.0258	5.92215e+06	http://metlin.scripps.edu/metabo_list.php?mass_min=549.41359&mass_max=549.4169	0.0648057	0.023648	0.0337139	1.84779	0.0370991	0.036487	0.0496789	0.0244668	0.016408	1.67632	5.5457	0.0242861	0.0264327	0.0329942
LPC(O-22:0)		564.439	9.9893		2.96539	0.0391729	24.3264	0.79581	0.425391	1	0.92886	0.917762	1	1.21713	0.173925	1	0.993336	0.999992	1	0.567892	0.451934	0.527492	0.6912	0.564107	0.0748108	Positive_normalized on LPC	C30H62O6P1N1	564.439	M564T599	564.439	564.439	9.9701	10.0108	5.35605e+06	http://metlin.scripps.edu/metabo_list.php?mass_min=563.42922&mass_max=563.43261	0.810223	0.518778	0.475274	0.532651	0.52458	0.425003	0.688732	0.497163	0.376577	0.482062	0.576419	0.45342	0.609003	0.499902
LPC(O-22:1)		562.423	9.9768		3.47163	0.0218402	13.5627	0.509577	0.2261	1	1.42735	0.148025	1	0.919812	0.986171	1	1.10541	0.968014	1	0.0558135	0.0284413	0.0796655	0.0513379	0.0616965	0.181646	Positive_normalized on LPC	C30H60O6P1N1	562.423	M562T599	562.423	562.423	9.9394	9.9948	562229	http://metlin.scripps.edu/metabo_list.php?mass_min=561.41351&mass_max=561.41689	0.0754218	0.0300419	0.0673389	0.0404975	0.0397044	0.038787	0.0989029	0.0224652	0.0298112	0.0330473	0.118828	0.0499945	0.0878722	0.0844236
LPC(O-23:0)		578.454	9.993		0.515152	0.725232	450.369	1.03683	0.999862	1	1.03011	0.999829	1	1.26956	0.643047	1	0.951425	0.999034	1	0.0386949	0.04012	0.03986	0.0491254	0.0368153	0.194121	Positive_normalized on LPC	C31H64O6P1N1	578.454	M578T600	578.454	578.455	9.9575	10.0305	390476	http://metlin.scripps.edu/metabo_list.php?mass_min=577.44476&mass_max=577.44823	0.0431234	0.0397258	0.0222633	0.0269423	0.028429	0.0358594	0.0745215	0.0406872	0.0238925	0.0557804	0.039785	0.03313	0.0547524	0.0216506
LPC(O-24:0)		592.47	9.99		1.74759	0.171155	106.287	0.870793	0.956273	1	1.03257	0.999353	1	1.3338	0.246221	1	0.890772	0.948659	1	0.596116	0.519094	0.615531	0.795103	0.531004	-0.0297836	Positive_normalized on LPC	C32H66O6P1N1	592.47	M592T599	592.47	592.47	9.9748	10.0076	5.81251e+06	http://metlin.scripps.edu/metabo_list.php?mass_min=591.4605&mass_max=591.46405	1.00792	0.428553	0.44146	0.516613	0.42216	0.510091	0.846016	0.623703	0.355261	0.578317	0.599916	0.415031	0.916659	0.45883
LPC(O-25:0)		606.486	9.975		1.55863	0.216155	134.232	0.400277	0.422769	1	1.07898	0.997521	1	0.452218	0.282523	1	0.884072	0.990828	1	0.304275	0.121794	0.328307	0.137599	0.269001	0.135895	Positive_normalized on LPC	C33H68O6P1N1	606.486	M606T598	606.485	606.486	9.9531	9.9939	2.4071e+06	http://metlin.scripps.edu/metabo_list.php?mass_min=605.476&mass_max=605.47964	0.0945395	0.413013	0.518077	0.0238432	0.40709	0.607331	0.0660338	0.0177201	0.321606	0.0260572	0.474378	0.367239	0.139108	0.419946
LPC(O-26:0)		620.501	9.9569		7.0221	0.000621361	0.385865	0.686053	0.610974	1	0.859153	0.907891	1	1.71416	0.00729681	1	0.777757	0.708304	1	0.253685	0.174041	0.217954	0.434857	0.197305	-0.0121158	Positive_normalized on LPC	C34H70O6P1N1	620.501	M621T597	620.501	620.502	9.9392	9.9775	2.40282e+06	http://metlin.scripps.edu/metabo_list.php?mass_min=619.49169&mass_max=619.49542	0.516142	0.178345	0.189263	0.180766	0.150965	0.238622	0.321692	0.18549	0.129736	0.206897	0.249801	0.143805	0.310314	0.148337
LPE(14:0)		426.261	9.2788		1	1	1	1	1	1	1	1	1	1	1	1	1	1	1	100	100	100	100	100	0.624387	Positive_normalized on LPE	C19H40O7P1N1	426.262	M426T557	426.261	426.261	9.2434	9.2983	1.20956e+08	http://metlin.scripps.edu/metabo_list.php?mass_min=425.25217&mass_max=425.25473	100	100	100	100	100	100	100	100	100	100	100	100	100	100
LPE(16:0)		454.293	9.2077		1.15914	0.35241	218.847	0.892532	0.985947	1	0.924798	0.990349	1	1.30124	0.446347	1	0.923568	0.991174	1	12.2151	10.9023	11.2965	15.8947	11.2814	0.410044	Positive_normalized on LPE	C21H44O7P1N1	454.293	M454T552	454.293	454.293	9.1715	9.2446	1.49765e+07	http://metlin.scripps.edu/metabo_list.php?mass_min=453.28346&mass_max=453.28619	20.6525	8.52539	8.78934	13.9764	14.2484	7.38404	11.9294	11.0457	11.3751	10.2862	14.2598	6.58929	13.6607	15.6053
LPE(16:1)		452.277	9.2077		2.06492	0.115746	71.8781	0.525641	0.512164	1	0.696266	0.66702	1	1.30341	0.667784	1	1.20942	0.888578	1	2.24294	1.17898	1.56168	2.92347	2.71265	0.38962	Positive_normalized on LPE	C21H42O7P1N1	452.277	M452T552	452.277	452.277	9.1532	9.2602	2.51586e+06	http://metlin.scripps.edu/metabo_list.php?mass_min=451.26783&mass_max=451.27055	2.10969	1.60735	1.34424	1.93486	5.60311	1.30682	1.7945	1.02981	1.29066	1.21647	1.4516	0.81096	1.47144	1.3828
LPE(18:0)		482.324	9.1572		2.05832	0.116688	72.4631	1.21889	0.929473	1	1.23688	0.808236	1	1.68825	0.059353	1	1.01708	0.999991	1	25.0214	30.4982	30.9485	42.2424	25.4489	0.199882	Positive_normalized on LPE	C23H48O7P1N1	482.324	M482T549	482.324	482.324	9.1177	9.1901	3.77648e+07	http://metlin.scripps.edu/metabo_list.php?mass_min=481.31478&mass_max=481.31767	40.6942	20.407	17.0909	28.4821	19.036	18.4516	30.9879	36.6191	25.329	29.5465	37.3874	21.6352	49.7932	33.7841
LPE(18:1)		480.308	9.1532		1.41037	0.259466	161.128	0.792471	0.826177	1	1.06075	0.993616	1	1.3252	0.291731	1	1.08826	0.978109	1	16.4097	13.0042	17.4066	21.7462	17.8581	0.158948	Positive_normalized on LPE	C23H46O7P1N1	480.308	M480T549	480.308	480.308	9.0999	9.185	2.16016e+07	http://metlin.scripps.edu/metabo_list.php?mass_min=479.29915&mass_max=479.30203	23.4454	14.1278	12.6569	17.9418	13.0214	16.674	17.0007	13.7727	13.3278	11.9122	25.9137	13.8521	16.3346	22.836
LPE(18:2)		478.293	9.1368		1.34309	0.281782	174.987	0.631788	0.91529	1	0.944185	0.999808	1	1.70628	0.324075	1	1.04171	0.999948	1	0.614056	0.387953	0.579783	1.04775	0.639671	0.117669	Positive_normalized on LPE	C23H44O7P1N1	478.293	M478T548	478.293	478.293	9.0475	9.2555	818518	http://metlin.scripps.edu/metabo_list.php?mass_min=477.28353&mass_max=477.28639	1.33427	0.334167	0.469938	0.437876	0.370522	0.515065	0.836559	0.55541	0.431847	0.176603	1.14511	0.485745	0.641982	0.229873
LPE(20:4)		502.293	8.993		1.59728	0.206083	127.978	0.863103	0.989402	1	0.908597	0.993932	1	1.53399	0.234231	1	0.988007	0.999998	1	5.31982	4.59155	4.83357	8.16052	5.25601	-0.0472233	Positive_normalized on LPE	C25H44O7P1N1	502.293	M502T540	502.293	502.293	8.8849	9.0466	6.87508e+06	http://metlin.scripps.edu/metabo_list.php?mass_min=501.28354&mass_max=501.28655	8.73593	3.68794	5.16316	4.62342	3.97907	6.92889	4.1203	5.36696	4.16398	4.2437	7.67534	3.08139	4.50602	3.12534
LPE(22:6)		526.293	8.9044		2.70108	0.0535498	33.2544	0.765882	0.869472	1	0.466146	0.109187	1	1.09252	0.98652	1	0.516541	0.18997	1	3.08637	2.3638	1.4387	3.37193	1.59424	0.0119327	Positive_normalized on LPE	C27H44O7P1N1	526.293	M526T534	526.293	526.293	8.8665	8.9936	2.81752e+06	http://metlin.scripps.edu/metabo_list.php?mass_min=525.28343&mass_max=525.28659	3.85117	2.46401	1.93101	3.00331	3.73239	4.46418	2.15853	2.29054	2.42852	2.37233	1.75368	0.253431	1.81075	1.69913
LPE(O-16:0)		438.298	9.1542		2.14698	0.104666	64.9973	0.555395	0.167835	1	0.817407	0.680725	1	1.14415	0.824379	1	0.904488	0.957114	1	39.8896	22.1545	32.606	45.6397	36.0797	0.368813	Positive_normalized on LPE	C21H44O6P1N1	438.298	M438T549	438.298	438.298	9.118	9.185	4.3352e+07	http://metlin.scripps.edu/metabo_list.php?mass_min=437.28862&mass_max=437.29125	48.624	34.1419	24.9927	46.4303	45.7064	36.9701	42.3619	23.5681	22.2705	20.6248	45.6415	22.2984	20.9486	53.0514
LPE(O-17:0)		452.313	9.136		2.58195	0.0617511	38.3474	0.558523	0.160484	1	0.752666	0.413144	1	1.13865	0.833994	1	0.821412	0.711514	1	4.84849	2.70799	3.64929	5.52072	3.98261	0.401744	Positive_normalized on LPE	C22H46O6P1N1	452.314	M452T548	452.313	452.313	9.101	9.1552	5.01027e+06	http://metlin.scripps.edu/metabo_list.php?mass_min=451.30422&mass_max=451.30693	5.31408	4.36677	3.15984	6.25322	4.98733	3.91337	5.9448	3.02629	2.7176	2.38009	4.9758	2.7637	1.6999	5.39117
LPE(O-18:0)		466.329	9.1006		1.21984	0.327464	203.355	0.619075	0.470068	1	1.07809	0.989169	1	1.21064	0.73571	1	1.09134	0.983361	1	12.2262	7.56895	13.1809	14.8015	13.3429	0.132477	Positive_normalized on LPE	C23H48O6P1N1	466.329	M466T546	466.329	466.329	9.0472	9.1187	1.50521e+07	http://metlin.scripps.edu/metabo_list.php?mass_min=465.31994&mass_max=465.32274	14.7646	11.7573	9.77829	12.2731	9.75284	9.82303	17.4343	8.49123	6.90588	7.30973	19.3275	9.96348	6.74407	19.0619
LPE(O-18:1)		464.313	9.1006		2.78389	0.0485275	30.1356	0.409649	0.0723321	1	0.740178	0.467721	1	1.11325	0.936394	1	0.758794	0.566361	1	19.4219	7.95615	14.3756	21.6214	14.7372	0.154452	Positive_normalized on LPE	C23H46O6P1N1	464.314	M464T546	464.313	464.314	9.0638	9.1322	1.90629e+07	http://metlin.scripps.edu/metabo_list.php?mass_min=463.30429&mass_max=463.30708	23.1797	17.0848	11.4188	24.1515	15.8256	18.5458	25.7467	8.45653	8.00041	7.4115	21.4359	9.89842	6.86025	20.8153
LPG(14:0)		455.242	7.8879		1	1	1	1	1	1	1	1	1	1	1	1	1	1	1	20	20	20	20	20	-0.0142125	Negative_normalized on LPG	C20H41O9P1	455.242	M455T473	455.242	455.242	7.8513	7.9259	1.55328e+08	http://metlin.scripps.edu/metabo_list.php?mass_min=456.24813&mass_max=456.25086	20	20	20	20	20	20	20	20	20	20	20	20	20	20
LPG(16:0)		483.273	7.7982		1.89465	0.142734	94.0615	0.328354	0.0555502	1	0.619033	0.216095	1	0.740748	0.538899	1	0.746961	0.592691	1	1.70695	0.560485	1.05666	1.26442	1.27503	0.0696457	Negative_normalized on LPG	C22H45O9P1	483.273	M483T468	483.273	483.273	7.7549	7.8156	9.46547e+06	http://metlin.scripps.edu/metabo_list.php?mass_min=484.27931&mass_max=484.28221	2.68702	1.02587	0.801342	2.88117	2.60091	1.27914	0.673212	0.538446	0.610257	0.532752	1.74231	0.330465	0.990909	1.49572
LPG(16:1)		481.257	7.777		4.57024	0.00658383	4.33874	0.441176	0.0419287	1	0.419994	0.00478675	1	0.844592	0.749385	1	0.556856	0.0461647	1	0.519238	0.229075	0.218077	0.438544	0.28914	0.0490255	Negative_normalized on LPG	C22H43O9P1	481.257	M481T467	481.257	481.257	7.7181	7.8151	2.72514e+06	http://metlin.scripps.edu/metabo_list.php?mass_min=482.26368&mass_max=482.26656	0.84002	0.35395	0.311069	0.680344	0.758088	0.436257	0.254935	0.205461	0.227763	0.254002	0.237883	0.0708461	0.321412	0.127608
LPG(17:0)		497.289	7.763		2.85004	0.0448713	29.5702	0.232095	0.0176061	1	0.53559	0.0786894	1	0.673252	0.298096	1	0.613383	0.200497	1	0.271218	0.0629483	0.145262	0.182598	0.166361	-0.253933	Negative_normalized on LPG	C23H47O9P1	497.288	M497T466	497.289	497.289	7.7164	7.7988	1.36018e+06	http://metlin.scripps.edu/metabo_list.php?mass_min=498.29508&mass_max=498.29807	0.431189	0.157064	0.165781	0.450096	0.366728	0.219748	0.10792	0.0564509	0.0709701	0.061424	0.291431	0.0539852	0.0911424	0.190868
LPG(17:1)		495.273	7.763		6.17849	0.00133798	0.881728	0.226815	0.0022879	1	0.343354	0.000914993	0.592172	0.658884	0.112805	1	0.59843	0.0618405	1	0.312188	0.0708088	0.107191	0.205696	0.186823	-0.315669	Negative_normalized on LPG	C23H45O9P1	495.273	M495T466	495.273	495.273	7.6902	7.8235	1.48632e+06	http://metlin.scripps.edu/metabo_list.php?mass_min=496.27946&mass_max=496.28243	0.420316	0.237058	0.204986	0.446993	0.409934	0.305509	0.16052	0.0366241	0.095211	0.0805915	0.172461	0.0423523	0.116785	0.129836
LPG(18:0)		511.304	7.7598		2.41316	0.0756854	49.8767	0.282177	0.0306317	1	0.64703	0.247205	1	0.808411	0.74226	1	0.610291	0.204343	1	2.09614	0.591482	1.35626	1.69454	1.27925	0.339887	Negative_normalized on LPG	C24H49O9P1	511.304	M511T466	511.304	511.304	7.7164	7.781	1.13267e+07	http://metlin.scripps.edu/metabo_list.php?mass_min=512.31038&mass_max=512.31345	3.59141	0.994892	1.6563	3.36204	2.50637	1.66778	0.894157	0.630634	0.591056	0.552756	1.92039	0.45091	1.20101	1.71638
LPG(18:1)		509.288	7.7464		4.21827	0.00956934	6.30619	0.322133	0.00500751	1	0.548158	0.0173018	1	0.77622	0.384077	1	0.678721	0.14229	1	10.9153	3.5162	5.98334	8.47271	7.40848	0.380377	Negative_normalized on LPG	C24H47O9P1	509.288	M509T465	509.288	509.289	7.6998	7.7654	5.97172e+07	http://metlin.scripps.edu/metabo_list.php?mass_min=510.29472&mass_max=510.29777	14.4684	8.09411	6.93448	16.0468	13.8894	10.9811	5.99322	3.50587	3.6105	3.43222	9.51429	2.48032	4.31588	6.90818
LPG(18:2)		507.273	7.7452		3.33625	0.025484	16.794	0.537123	0.169633	1	0.499578	0.0324503	1	1.021	0.999867	1	0.752324	0.501508	1	1.25489	0.674031	0.626916	1.28124	0.944085	0.30291	Negative_normalized on LPG	C24H45O9P1	507.273	M507T465	507.273	507.273	7.6998	7.7654	7.79371e+06	http://metlin.scripps.edu/metabo_list.php?mass_min=508.27911&mass_max=508.28216	2.20561	1.17846	1.13965	1.21637	1.4891	0.812225	0.742813	0.656931	0.666158	0.699003	0.755971	0.344723	0.663201	0.403385
LPG(18:3)		505.258	7.7455		4.64311	0.00610056	4.02027	0.515202	0.345809	1	0.239328	0.0120571	1	0.936426	0.996571	1	0.250801	0.0181418	1	0.0713537	0.0367615	0.017077	0.0668175	0.0178956	-0.448101	Negative_normalized on LPG	C24H43O9P1	505.257	M505T465	505.257	505.258	7.691	7.7636	329242	http://metlin.scripps.edu/metabo_list.php?mass_min=506.26386&mass_max=506.26689	0.164103	0.0346398	0.063993	0.0663313	0.119739	0.0297281	0.0209425	0.021023	0.0424155	0.0468462	0.0216061	0.011	0.0275842	0.0141886
LPG(19:1)		523.304	7.7281		3.57502	0.0194312	12.8052	0.347106	0.212593	1	1.52599	0.185598	1	0.901978	0.989192	1	1.30452	0.665764	1	0.208331	0.0723129	0.317911	0.18791	0.271771	-0.0692028	Negative_normalized on LPG	C25H49O9P1	523.304	M523T464	523.304	523.304	7.663	7.7654	1.73807e+06	http://metlin.scripps.edu/metabo_list.php?mass_min=524.31056&mass_max=524.3137	0.284561	0.129704	0.108996	0.325837	0.294911	0.219983	0.0943251	0.0566681	0.0816792	0.0785913	0.533056	0.119591	0.19907	0.419605
LPG(20:1)		537.32	7.7163		7.84501	0.00030616	0.201759	0.300274	0.329982	1	2.22759	0.00387888	1	0.869618	0.986176	1	1.74742	0.129393	1	0.242893	0.0729343	0.541064	0.211224	0.424435	-0.234777	Negative_normalized on LPG	C26H51O9P1	537.32	M537T463	537.32	537.32	7.663	7.7455	2.46413e+06	http://metlin.scripps.edu/metabo_list.php?mass_min=538.32625&mass_max=538.32948	0.341476	0.178109	0.142723	0.397124	0.309948	0.219578	0.111292	0.0914071	0.0729615	0.0544342	0.899668	0.213143	0.409685	0.805773
LPG(20:2)		535.304	7.7149		10.596	3.67138e-05	0.0241944	0.603656	0.607827	1	2.18752	0.000441714	0.274658	1.07449	0.995759	1	1.97623	0.00498917	1	0.39976	0.241317	0.874482	0.429537	0.790016	-0.0863324	Negative_normalized on LPG	C26H49O9P1	535.304	M535T463	535.304	535.305	7.6447	7.7455	4.52285e+06	http://metlin.scripps.edu/metabo_list.php?mass_min=536.31054&mass_max=536.31375	0.685035	0.320234	0.304555	0.398649	0.419882	0.425374	0.24459	0.253712	0.236615	0.233625	1.37551	0.419935	0.798894	0.876154
LPG(20:3)		533.289	7.7176		0.59605	0.668797	440.737	0.581204	0.46719	1	0.828005	0.881916	1	0.975166	0.999912	1	0.862395	0.949041	1	1.43541	0.834265	1.18853	1.39976	1.23789	-0.0680271	Negative_normalized on LPG	C26H47O9P1	533.288	M533T463	533.289	533.289	7.6447	7.7453	1.00472e+07	http://metlin.scripps.edu/metabo_list.php?mass_min=534.29488&mass_max=534.29808	3.40708	0.988123	1.12686	0.958787	1.16082	1.58526	0.82094	1.05529	0.595153	0.852356	1.57786	0.51378	1.68342	0.842595
LPG(20:4)		531.273	7.7091		0.781	0.548164	361.24	0.584577	0.791039	1	0.488265	0.43965	1	0.980288	0.999994	1	0.682254	0.818586	1	1.54534	0.90337	0.754535	1.51488	1.05431	-0.0684057	Negative_normalized on LPG	C26H45O9P1	531.273	M531T463	531.273	531.273	7.6447	7.7291	9.5905e+06	http://metlin.scripps.edu/metabo_list.php?mass_min=532.27923&mass_max=532.28242	5.04934	0.995518	1.26518	0.735796	0.827061	1.25502	0.68947	1.17974	0.510666	1.0197	0.641252	0.373387	1.63886	0.179633
LPG(20:5)		529.257	7.7101		8.40816	0.000192637	0.126948	0.666914	0.724219	1	0.0518163	0.00377795	1	1.27613	0.676766	1	0.13428	0.0117424	1	0.812877	0.542118	0.0421203	1.03734	0.109153	-0.0876815	Negative_normalized on LPG	C26H43O9P1	529.257	M529T463	529.257	529.258	7.6447	7.7291	4.13956e+06	http://metlin.scripps.edu/metabo_list.php?mass_min=530.2636&mass_max=530.26677	1.93126	0.743976	0.796782	0.462877	0.603163	0.694179	0.457898	0.651281	0.32946	0.645614	0.024582	0.0199055	0.121644	0.00824286
LPG(21:3)		547.305	7.6959		2.36696	0.0800436	52.7487	0.543321	0.878253	1	2.03779	0.122662	1	1.40436	0.821276	1	1.88484	0.253419	1	0.105439	0.0572871	0.214862	0.148074	0.198736	-0.395053	Negative_normalized on LPG	C27H49O9P1	547.304	M547T462	547.304	547.305	7.6263	7.7291	1.24071e+06	http://metlin.scripps.edu/metabo_list.php?mass_min=548.31067&mass_max=548.31395	0.275451	0.105768	0.0553285	0.0745999	0.0415959	0.159294	0.0260334	0.0562265	0.0526826	0.0629521	0.292191	0.088515	0.300268	0.0976169
LPG(22:3)		561.32	7.6817		18.7225	3.13378e-07	0.000206516	1.07199	0.999985	1	6.8764	1.84298e-07	0.000852476	1.36489	0.977527	1	4.334	0.00221151	1	0.108887	0.116726	0.74875	0.148619	0.471917	0.0959344	Negative_normalized on LPG	C28H51O9P1	561.32	M561T461	561.32	561.32	7.6263	7.7291	2.62812e+06	http://metlin.scripps.edu/metabo_list.php?mass_min=562.32601&mass_max=562.32938	0.286607	0.0734012	0.13967	0.0515148	0.0586672	0.071182	0.0811671	0.176866	0.0652551	0.108058	0.988542	0.353726	0.988083	0.40956
LPG(22:4)		559.304	7.6847		7.71827	0.000340587	0.224447	1.17684	0.99988	1	6.53962	0.000329662	0.253744	1.34468	0.995553	1	4.12415	0.0614995	1	0.62854	0.73969	4.11042	0.845184	2.5922	0.131924	Negative_normalized on LPG	C28H49O9P1	559.304	M559T461_2	559.304	559.304	7.6263	7.7273	1.45073e+07	http://metlin.scripps.edu/metabo_list.php?mass_min=560.31034&mass_max=560.3137	1.51156	0.494168	0.717472	0.319589	0.425331	0.507504	0.424159	1.07976	0.44898	0.690328	4.84643	2.03424	7.19046	1.64417
LPG(22:5)		557.289	7.6842		3.32775	0.0257336	16.9584	0.766126	0.885965	1	1.72979	0.0243852	1	1.12419	0.966911	1	1.1476	0.947843	1	4.64753	3.56059	8.03927	5.22471	5.33349	0.204063	Negative_normalized on LPG	C28H47O9P1	557.288	M557T461_2	557.288	557.289	7.6263	7.7112	4.35681e+07	http://metlin.scripps.edu/metabo_list.php?mass_min=558.29466&mass_max=558.298	8.82791	3.82869	4.42895	3.40766	3.94754	4.67372	3.41826	4.48102	2.49425	3.70652	9.30021	4.66533	10.5186	4.5011
LPG(22:6)		555.273	7.683		5.49376	0.00257896	1.69953	0.564982	0.0714057	1	0.768841	0.30294	1	1.19193	0.46343	1	0.663787	0.0880523	1	19.6903	11.1246	15.1387	23.4695	13.0701	0.16867	Negative_normalized on LPG	C28H45O9P1	555.273	M555T461	555.273	555.273	7.6263	7.7107	1.34636e+08	http://metlin.scripps.edu/metabo_list.php?mass_min=556.27903&mass_max=556.28236	32.1127	15.3706	17.994	17.27	18.0086	22.1069	14.9693	12.1186	10.4621	10.7932	18.8469	9.38014	14.4788	12.5629
LPG(24:5)		585.32	7.6406		9.52008	8.07866e-05	0.0532383	1.85009	0.967009	1	7.39553	0.000207972	0.139877	1.54751	0.982936	1	6.33949	0.002405	1	0.0119895	0.0221816	0.0886685	0.0185538	0.0760071	-0.318031	Negative_normalized on LPG	C30H51O9P1	585.32	M585T458	585.32	585.32	7.5896	7.6666	346437	http://metlin.scripps.edu/metabo_list.php?mass_min=586.32618&mass_max=586.32969	0.0182974	0.0182925	0.0070588	0.0142759	0.00273651	0	0.0232652	0.0166166	0.0302534	0.0196748	0.13794	0.0355392	0.0490261	0.0542044
LPI(16:0)		571.289	8.7903		0.545099	0.704171	464.049	1.67995	0.900168	1	1.30214	0.985039	1	1.88765	0.609534	1	0.918288	0.99992	1	8.05787	13.5368	10.4925	15.2105	7.39944	0.200732	Negative_normalized on LPE	C25H49O12P1	571.289	M571T527	571.289	571.289	8.7333	8.8629	9.77594e+06	http://metlin.scripps.edu/metabo_list.php?mass_min=572.29512&mass_max=572.29855	26.1012	4.9332	1.7195	6.57964	6.99955	5.40531	4.6667	23.691	3.75816	13.1612	14.6564	1.02027	30.8532	5.61006
LPI(16:1)		569.273	8.7939		2.63583	0.0578897	38.1493	0.84485	0.966779	1	0.466166	0.114003	1	1.19165	0.851227	1	1.05013	0.998927	1	2.74084	2.3156	1.27769	3.26611	2.87823	0.324294	Negative_normalized on LPE	C25H47O12P1	569.273	M569T528	569.272	569.273	8.7333	8.9439	2.28581e+06	http://metlin.scripps.edu/metabo_list.php?mass_min=570.2794&mass_max=570.28282	4.15302	2.81765	1.70113	1.82161	3.82668	1.63269	3.23309	3.82729	1.03764	2.08186	2.83387	0.637293	1.904	1.51874
LPI(17:0)		585.305	8.7813		0.57991	0.679928	448.073	1.61402	0.965172	1	1.24044	0.99721	1	1.94607	0.723027	1	0.556619	0.97636	1	3.65323	5.89637	4.5316	7.10944	2.03346	-0.350689	Negative_normalized on LPE	C26H51O12P1	585.305	M585T527	585.305	585.305	8.7333	8.8528	4.14528e+06	http://metlin.scripps.edu/metabo_list.php?mass_min=586.31104&mass_max=586.31455	13.6827	1.95551	0.776043	2.8654	1.66335	3.63085	0.998776	10.7029	0.333078	6.65317	5.75612	0.364055	16.5788	1.63262
LPI(17:1)		583.289	8.7812		0.731479	0.57904	381.588	0.966567	0.99997	1	0.664273	0.691452	1	1.20075	0.927278	1	0.97729	0.999985	1	0.706164	0.682555	0.469086	0.847929	0.690127	-0.163425	Negative_normalized on LPE	C26H49O12P1	583.289	M583T527	583.289	583.29	8.7122	8.861	620572	http://metlin.scripps.edu/metabo_list.php?mass_min=584.29529&mass_max=584.29879	1.19672	0.701056	0.39494	0.540027	0.936732	0.560103	0.613573	1.13053	0.327508	0.58963	0.859666	0.143787	0.831081	0.395737
LPI(18:0)		599.32	8.764		0.694022	0.603131	397.464	1.24461	0.997216	1	0.956829	0.999992	1	1.69991	0.763157	1	0.451608	0.893508	1	223.562	278.247	213.911	380.035	100.963	-0.0754122	Negative_normalized on LPE	C27H53O12P1	599.32	M599T526	599.32	599.321	8.6945	8.8346	2.15812e+08	http://metlin.scripps.edu/metabo_list.php?mass_min=600.3265&mass_max=600.33009	808.266	129.297	65.8857	177.188	88.8741	237.806	57.6192	483.68	20.5903	330.471	276.308	19.3976	689.51	88.9242
LPI(18:1)		597.305	8.7442		0.15633	0.958307	631.524	1.30238	0.9699	1	1.10382	0.998576	1	1.3322	0.903677	1	1.07788	0.999606	1	19.7237	25.6877	21.7714	26.2758	21.2597	-0.276676	Negative_normalized on LPE	C27H51O12P1	597.305	M597T525	597.305	597.305	8.6945	8.8167	2.09578e+07	http://metlin.scripps.edu/metabo_list.php?mass_min=598.31097&mass_max=598.31456	40.2202	15.6044	7.72569	18.0483	16.8645	25.3926	14.2098	44.7413	6.20867	26.1131	38.5393	5.29346	47.0503	15.6216
LPI(18:2)		595.289	8.7458		1.77273	0.16592	109.341	0.76929	0.856112	1	0.594664	0.25392	1	1.0361	0.999566	1	1.15141	0.923279	1	3.15621	2.42804	1.87688	3.27013	3.63407	-0.479303	Negative_normalized on LPE	C27H49O12P1	595.289	M595T525	595.289	595.29	8.6945	8.8167	2.62863e+06	http://metlin.scripps.edu/metabo_list.php?mass_min=596.29545&mass_max=596.29902	4.08406	3.08352	2.5343	3.08995	4.52449	1.84066	2.93646	3.59203	1.407	2.28508	3.78528	1.01175	2.12589	2.27651
LPI(19:0)		613.336	8.7463		0.728507	0.580929	382.832	1.75887	0.98112	1	1.85781	0.930432	1	2.94806	0.452331	1	0.809951	0.99979	1	1.32912	2.33774	2.46924	3.91832	1.07652	0.024241	Negative_normalized on LPE	C28H55O12P1	613.336	M613T525	613.336	613.336	8.6945	8.8167	2.05477e+06	http://metlin.scripps.edu/metabo_list.php?mass_min=614.34204&mass_max=614.34572	5.59088	0.623549	0.248986	1.0117	0.390033	1.2493	0.189362	4.07376	0.0972433	2.84221	3.12215	0.222224	8.73378	0.941002
LPI(20:2)		623.32	8.7152		2.96277	0.0392933	25.8943	0.729128	0.999401	1	3.94102	0.0758806	1	1.20011	0.999503	1	3.84694	0.107313	1	0.357361	0.260562	1.40837	0.428873	1.37475	0.00770695	Negative_normalized on LPE	C29H53O12P1	623.32	M623T523_2	623.32	623.321	8.655	8.781	783576	http://metlin.scripps.edu/metabo_list.php?mass_min=624.32637&mass_max=624.33011	0.439598	0.260395	0.185603	0.369302	0.545968	0.412662	0.288003	0.546282	0.0660982	0.169306	2.62132	0.535226	1.76691	2.07275
LPI(20:3)		621.305	8.7263		2.06477	0.115768	76.2909	0.263826	0.156201	1	0.587949	0.407461	1	0.7721	0.837306	1	1.15242	0.959698	1	12.6739	3.34371	7.45162	9.78553	14.6057	0.1042	Negative_normalized on LPE	C29H51O12P1	621.305	M621T524	621.305	621.305	8.655	8.781	9.27861e+06	http://metlin.scripps.edu/metabo_list.php?mass_min=622.31067&mass_max=622.3144	10.7302	10.3029	6.02338	14.8552	20.7044	15.7905	10.3108	4.44628	2.4863	3.09855	14.8315	5.44465	3.83003	11.0626
LPI(20:4)		619.289	8.713		5.32587	0.00304404	2.00602	0.304937	0.016766	1	0.460646	0.0164686	1	0.879097	0.901441	1	1.05399	0.995027	1	112.497	34.3046	51.8214	98.896	118.571	0.136731	Negative_normalized on LPE	C29H49O12P1	619.289	M619T523	619.289	619.289	8.655	8.7905	7.95554e+07	http://metlin.scripps.edu/metabo_list.php?mass_min=620.29501&mass_max=620.29872	132.005	112.373	78.7613	107.146	148.407	105.037	103.751	47.2856	24.6168	31.0113	117.414	31.5029	30.8003	53.8955
LPI(20:5)		617.274	8.7106		13.8318	4.42758e-06	0.00291778	0.239911	0.00180277	1	0.0776464	4.84783e-06	0.00293086	0.862305	0.773828	1	0.334438	0.000792331	0.499056	1.67649	0.40221	0.130174	1.44565	0.560684	-0.138331	Negative_normalized on LPE	C29H47O12P1	617.273	M617T523	617.273	617.274	8.6614	8.7989	762985	http://metlin.scripps.edu/metabo_list.php?mass_min=618.27953&mass_max=618.28323	2.39679	1.11479	1.09132	1.80116	2.57741	1.54688	1.20712	0.488511	0.334275	0.383845	0.334046	0.0442513	0.0561267	0.227625
LPI(22:4)		647.321	8.6922		5.6315	0.00225427	1.48556	0.448777	0.992683	1	5.39644	0.0081356	1	0.951721	0.999999	1	4.68	0.0385397	1	1.17993	0.529523	6.36739	1.12296	5.52206	-0.394235	Negative_normalized on LPE	C31H53O12P1	647.32	M647T522	647.321	647.321	8.6177	8.7545	3.0845e+06	http://metlin.scripps.edu/metabo_list.php?mass_min=648.32656&mass_max=648.33045	1.68532	1.53242	0.749688	1.08833	1.27617	1.17401	0.753551	0.952563	0.284821	0.351186	15.3618	3.62788	2.21707	9.45776
LPI(22:5)		645.305	8.6885		1.79089	0.162238	106.915	0.302057	0.148296	1	1.082	0.993758	1	0.739294	0.724542	1	1.04185	0.999608	1	4.86074	1.46822	5.25933	3.59351	5.06415	-0.519538	Negative_normalized on LPE	C31H51O12P1	645.305	M645T521	645.305	645.305	8.6255	8.7632	3.87262e+06	http://metlin.scripps.edu/metabo_list.php?mass_min=646.311&mass_max=646.31487	5.65715	5.15104	2.44231	5.80574	7.44156	3.90432	3.62305	1.96445	0.981632	1.45858	10.8763	2.03694	2.44515	9.17616
LPI(22:6)		643.289	8.6897		1.33236	0.285509	188.15	0.251449	0.215577	1	0.594055	0.513777	1	0.821702	0.945264	1	1.01609	0.999996	1	2.9758	0.748263	1.76779	2.44522	3.02368	-0.427994	Negative_normalized on LPE	C31H49O12P1	643.289	M643T521	643.289	643.29	8.6177	8.7632	2.09995e+06	http://metlin.scripps.edu/metabo_list.php?mass_min=644.29529&mass_max=644.29915	2.73599	2.41165	1.42647	3.94054	4.7843	2.99565	2.53602	1.09635	0.434682	0.713757	3.02589	0.91854	0.375838	4.35024
LPS(14:0)		468.237	9.0179		3.8032	0.0150579	9.92316	1.51453	0.105707	1	1.51842	0.0243526	1	1.41114	0.0915668	1	1.65533	0.00545584	1	7.72171	11.6948	11.7248	10.8964	12.782	0.596937	Negative_normalized on PS	C20H40O9P1N1	468.237	M468T541	468.237	468.237	8.9814	9.0623	4.33087e+06	http://metlin.scripps.edu/metabo_list.php?mass_min=469.24316&mass_max=469.24597	10.0615	5.57816	6.45307	5.50833	7.59558	9.07833	9.77701	12.2919	13.5488	9.24349	10.1197	10.0732	11.5118	12.9433
LPS(16:0)		496.268	8.9837		1.52241	0.226033	148.956	0.599446	0.853431	1	1.67078	0.286917	1	1.38662	0.736115	1	1.44615	0.664146	1	2.6528	1.59021	4.43224	3.67844	3.83635	-0.101486	Negative_normalized on PS	C22H44O9P1N1	496.268	M496T539	496.268	496.269	8.9466	9.0265	1.38029e+06	http://metlin.scripps.edu/metabo_list.php?mass_min=497.27471&mass_max=497.27769	7.04399	1.05573	2.00584	1.40885	2.43925	2.31775	2.29821	1.72192	2.006	1.04271	4.7097	1.75039	4.6066	6.29292
LPS(16:1)		494.253	8.9605		1.04864	0.402258	265.088	1.60054	0.951451	1	2.50512	0.245974	1	2.33175	0.345382	1	2.16466	0.497306	1	0.714857	1.14416	1.7908	1.66686	1.54742	-0.000866156	Negative_normalized on PS	C22H42O9P1N1	494.252	M494T538	494.252	494.253	8.9116	9.0012	535902	http://metlin.scripps.edu/metabo_list.php?mass_min=495.25901&mass_max=495.26198	1.26137	0.592686	0.322191	0.36701	0.548851	1.02863	0.883257	1.47073	0.963994	0.997755	0.406201	1.12705	5.52371	1.93518
LPS(17:0)		510.284	8.9713		0.827591	0.520184	342.801	0.954021	0.999905	1	1.48998	0.405598	1	1.39051	0.600583	1	1.27472	0.848023	1	2.06355	1.96867	3.07466	2.86939	2.63045	0.391351	Negative_normalized on PS	C23H46O9P1N1	510.284	M510T538	510.283	510.284	8.9298	9.0061	1.06905e+06	http://metlin.scripps.edu/metabo_list.php?mass_min=511.29007&mass_max=511.29313	5.21104	0.793287	1.2971	1.43818	1.33557	1.98202	2.38769	2.17929	1.90263	1.8241	3.8019	1.47961	4.75169	3.49461
LPS(18:0)		524.299	8.9562		1.28279	0.303329	199.894	0.93633	0.999537	1	1.32415	0.685794	1	1.52739	0.279573	1	0.969781	0.999943	1	100.882	94.4592	133.583	154.087	97.8339	0.400084	Negative_normalized on PS	C24H48O9P1N1	524.299	M524T537	524.299	524.3	8.9298	9.0082	4.8248e+07	http://metlin.scripps.edu/metabo_list.php?mass_min=525.30567&mass_max=525.30882	238.597	49.6211	65.7481	75.1907	69.7084	97.7916	109.52	107.488	84.6595	91.23	140.554	61.6287	203.168	152.876
LPS(18:1)		522.284	8.9298		1.21557	0.329164	216.919	0.636008	0.648281	1	1.16776	0.913663	1	1.29942	0.600814	1	1.1935	0.881577	1	24.4861	15.5733	28.5939	31.8177	29.2241	0.152599	Negative_normalized on PS	C24H46O9P1N1	522.284	M522T536	522.284	522.284	8.8909	8.9805	1.14684e+07	http://metlin.scripps.edu/metabo_list.php?mass_min=523.29015&mass_max=523.29328	42.2317	16.0916	23.4723	18.2131	18.1416	27.6545	25.5979	21.8496	10.3278	14.5426	40.4528	10.1047	29.2794	35.5991
LPS(18:2)		520.268	8.935		4.54823	0.00673776	4.44019	0.616431	0.715621	1	1.42423	0.426942	1	1.05187	0.999326	1	1.98768	0.0115278	1	0.700869	0.432038	0.998197	0.737221	1.3931	0.0761836	Negative_normalized on PS	C24H44O9P1N1	520.268	M520T536	520.268	520.269	8.9035	9.0193	384434	http://metlin.scripps.edu/metabo_list.php?mass_min=521.27455&mass_max=521.27767	1.42839	0.831163	0.802777	0.103913	0.363701	0.808445	0.567689	0.472236	0.264757	0.55912	1.51316	0.206451	1.30445	0.925922
LPS(19:0)		538.315	8.9419		0.536033	0.710529	468.239	0.690992	0.899159	1	1.27333	0.850334	1	1.02505	0.99998	1	0.892717	0.99482	1	2.077	1.43519	2.6447	2.12903	1.85417	0.185445	Negative_normalized on PS	C25H50O9P1N1	538.315	M538T537	538.315	538.315	8.9035	8.9635	868075	http://metlin.scripps.edu/metabo_list.php?mass_min=539.32139&mass_max=539.32462	3.87537	0.535852	0.897086	1.91584	0.99835	5.20913	1.10737	1.17608	1.37931	1.75018	2.48119	0.931445	3.77482	3.35501
LPS(20:1)		550.315	8.9548		1.12467	0.36733	242.071	0.589637	0.734531	1	1.41421	0.531536	1	1.17883	0.951767	1	1.21066	0.927388	1	1.27638	0.752601	1.80507	1.50463	1.54526	-0.109341	Negative_normalized on PS	C26H50O9P1N1	550.315	M550T537	550.315	550.316	8.9087	8.9954	605672	http://metlin.scripps.edu/metabo_list.php?mass_min=551.32151&mass_max=551.32481	2.44123	0.507245	1.14365	1.23475	0.9554	1.67182	0.980568	1.13782	0.691749	0.42824	2.27364	0.964721	2.09074	1.72775
LPS(20:3)		546.284	8.9036		0.545674	0.703768	463.783	0.566988	0.798431	1	1.18338	0.969855	1	1.1874	0.967453	1	1.20302	0.962597	1	1.6455	0.932979	1.94725	1.95387	1.97957	-0.000549348	Negative_normalized on PS	C26H46O9P1N1	546.284	M546T534_1	546.284	546.284	8.8531	8.9417	758685	http://metlin.scripps.edu/metabo_list.php?mass_min=547.29016&mass_max=547.29343	3.63033	0.751361	1.40233	0.856408	1.23824	2.35054	1.28928	1.83065	0.343133	0.625153	2.25916	0.362005	2.77052	1.15995
LPS(20:4)		544.268	8.9065		1.05402	0.399693	263.398	0.407193	0.868998	1	1.40259	0.91234	1	1.79593	0.510531	1	1.60244	0.753304	1	1.48875	0.60621	2.0881	2.67369	2.38563	-0.0374156	Negative_normalized on PS	C26H44O9P1N1	544.268	M544T534	544.268	544.269	8.8702	8.9535	880049	http://metlin.scripps.edu/metabo_list.php?mass_min=545.27454&mass_max=545.27781	6.33614	0.586456	1.16949	0.411864	0.357195	0.817842	0.742277	0.730438	0.217068	0.871123	3.41045	0.715788	3.775	1.21575
LPS(22:1)		578.347	8.9113		0.506171	0.731576	482.108	0.613853	0.662352	1	1.02446	0.999955	1	1.08127	0.995001	1	0.900414	0.990752	1	2.93538	1.8019	3.00719	3.17394	2.64306	0.0517958	Negative_normalized on PS	C28H54O9P1N1	578.346	M578T535	578.346	578.347	8.8049	8.9635	1.21788e+06	http://metlin.scripps.edu/metabo_list.php?mass_min=579.35263&mass_max=579.3561	5.7589	1.15416	2.28829	2.68755	1.92916	4.15128	2.57835	1.9618	2.63626	0.80763	4.88616	1.46448	3.09444	2.54764
LPS(22:4)		572.299	8.877		0.877621	0.491333	323.789	0.526344	0.9992	1	3.99094	0.391161	1	2.77933	0.791051	1	1.33957	0.999496	1	1.3461	0.708512	5.37221	3.74125	1.8032	0.401475	Negative_normalized on PS	C28H48O9P1N1	572.299	M572T533	572.299	572.3	8.8445	8.9274	1.17254e+06	http://metlin.scripps.edu/metabo_list.php?mass_min=573.30551&mass_max=573.30894	2.3561	1.30747	0.484895	2.48002	1.6426	1.02766	0.123954	1.17404	0.661403	0.290092	3.6812	0.803326	16.3683	2.124
LPS(22:5)		570.284	8.8821		0.747861	0.5687	374.773	0.972548	0.999995	1	1.03858	0.999947	1	1.31577	0.867945	1	0.579071	0.741405	1	1.50931	1.46787	1.56754	1.98589	0.873994	0.0696143	Negative_normalized on PS	C28H46O9P1N1	570.284	M570T533	570.284	570.284	8.8033	8.9417	599588	http://metlin.scripps.edu/metabo_list.php?mass_min=571.29005&mass_max=571.29347	3.82249	0.705505	0.749757	0.718275	1.58843	1.83503	1.14565	2.78623	0.696988	0.920396	0.946812	0.353757	1.20331	1.10821
LPS(22:6)		568.268	8.8802		0.760627	0.560728	369.52	0.548769	0.658327	1	0.652982	0.663668	1	0.986073	0.999997	1	0.61763	0.619803	1	3.63432	1.9944	2.37314	3.5837	2.24467	0.104943	Negative_normalized on PS	C28H44O9P1N1	568.268	M568T533	568.268	568.269	8.8423	8.9138	1.14119e+06	http://metlin.scripps.edu/metabo_list.php?mass_min=569.27439&mass_max=569.2778	8.05605	1.44955	1.71081	2.95138	3.598	4.93894	2.7355	2.84676	1.26808	1.86837	2.22864	0.0637352	1.85906	3.44896
LPS(24:0)		608.394	8.8755		2.00467	0.124643	82.1398	0.462316	0.652712	1	0.836227	0.979328	1	1.58064	0.371306	1	0.709664	0.878076	1	7.18994	3.32402	6.01242	11.3647	5.10244	-0.394238	Negative_normalized on PS	C30H60O9P1N1	608.393	M608T533	608.394	608.394	8.7814	8.9284	3.16149e+06	http://metlin.scripps.edu/metabo_list.php?mass_min=609.39977&mass_max=609.40342	16.9748	2.14151	3.03968	4.16882	3.3968	10.0218	10.5862	5.36713	1.77966	2.82528	13.0381	1.10683	7.80547	7.7431
LPS(24:1)		606.378	8.877		1.15612	0.353696	233.086	0.562932	0.735583	1	1.41815	0.578141	1	1.21782	0.925264	1	0.943548	0.999574	1	3.61997	2.0378	5.13366	4.40847	3.41562	-0.428637	Negative_normalized on PS	C30H58O9P1N1	606.378	M606T533	606.378	606.378	8.8243	8.9284	1.74169e+06	http://metlin.scripps.edu/metabo_list.php?mass_min=607.38414&mass_max=607.38778	7.39068	1.03861	2.13175	2.29901	2.06584	5.73786	4.67607	3.002	1.63553	1.47586	10.8225	2.90182	5.58677	6.88115
LPS(26:0)		636.425	8.8566		4.23155	0.00943366	6.21678	1.30951	0.999507	1	2.8038	0.567658	1	6.54554	0.00286166	1	2.66599	0.662781	1	0.534163	0.699489	1.49769	3.49639	1.42407	-0.18812	Negative_normalized on PS	C32H64O9P1N1	636.425	M636T531	636.424	636.425	8.7814	8.9274	761144	http://metlin.scripps.edu/metabo_list.php?mass_min=637.43086&mass_max=637.43468	0.894546	0.0943194	0.35046	0.616559	0.62638	0.606201	0.550675	1.37382	0.18535	0.539298	3.56051	0.30381	3.11728	1.1381
MLCL1(52:5)		1159.72	7.3644		3.21292	0.0293666	19.3526	0.158381	0.0572707	1	0.302625	0.0387844	1	0.330761	0.0494769	1	0.762767	0.796316	1	1.06559	0.16877	0.322475	0.352457	0.812799	0.165685	Negative_normalized on CL1	C61H110O16P2	1159.72	M1160T442	1159.72	1159.72	7.3424	7.4159	247253	http://metlin.scripps.edu/metabo_list.php?mass_min=1160.72402&mass_max=1160.73098	0.702593	1.07349	0.798979	1.43968	0.701951	2.31558	0.426874	0.078625	0.367711	0.0599734	0.60043	0.516276	0.0757005	0.372172
MLCL1(54:6)		1185.74	7.3341		3.0676	0.0347593	22.9064	0.268465	0.146619	1	0.554163	0.320589	1	0.431793	0.145054	1	1.16723	0.940528	1	1.8743	0.503183	1.03867	0.809308	2.18774	0.119936	Negative_normalized on CL1	C63H112O16P2	1185.74	M1186T440	1185.73	1185.74	7.2771	7.3614	579378	http://metlin.scripps.edu/metabo_list.php?mass_min=1186.73964&mass_max=1186.74675	1.4873	1.22368	1.28277	2.38156	1.87769	2.90821	1.95887	0.282692	0.97586	0.250996	1.8429	1.27989	0.172259	1.45898
MLCL2(50:3)		567.356	7.4317		1.49526	0.233727	154.026	4.81205	0.53781	1	1.85719	0.988556	1	4.22592	0.460868	1	6.07435	0.140008	1	0.6227	2.99647	1.15647	2.63148	3.7825	0.0640654	Negative_normalized on CL2	C59H110O16P2	567.356	M567T446	567.356	567.357	7.3818	7.4955	7.05768e+06	http://metlin.scripps.edu/metabo_list.php?mass_min=568.3625&mass_max=568.3659	0.144907	0.152859	0.0568318	3.27757	0.103314	0.529768	0.093649	6.37334	0.0717786	2.54428	7.36486	0.0740352	0.108374	0.214513
MLCL2(50:4)		566.349	7.4132		3.00155	0.0375475	24.7438	0.109404	0.0549665	1	0.208161	0.0235118	1	0.314383	0.0567527	1	0.48133	0.224659	1	0.194584	0.0212882	0.0405048	0.0611737	0.093659	-0.0859614	Negative_normalized on CL2	C59H108O16P2	566.348	M566T445	566.348	566.349	7.3725	7.4454	279053	http://metlin.scripps.edu/metabo_list.php?mass_min=567.35476&mass_max=567.35816	0.0555847	0.15717	0.110068	0.229176	0.0726797	0.584116	0.153293	0.0197452	0.0359154	0.00820408	0.0973609	0.0270969	0.0155565	0.0168727
MLCL2(52:2)		582.38	7.4023		1.06557	0.394239	259.804	0.743965	0.999875	1	1.2108	0.999841	1	1.56904	0.992406	1	4.13208	0.264718	1	0.0907801	0.0675372	0.109917	0.142438	0.37511	-0.54699	Negative_normalized on CL2	C61H116O16P2	582.38	M582T444	582.38	582.381	7.3602	7.4798	523510	http://metlin.scripps.edu/metabo_list.php?mass_min=583.38628&mass_max=583.38978	0.0954869	0.0226896	0.0472128	0.0494243	0.0730277	0.251669	0.095951	0.0714071	0.0707835	0.0604211	0.11768	0.076086	0.146335	0.137404
MLCL2(52:3)		581.372	7.3886		0.910266	0.473188	311.831	0.669571	0.786692	1	1.06111	0.998536	1	1.32644	0.620732	1	1.14981	0.964135	1	0.562264	0.376476	0.596623	0.74581	0.646496	-0.676999	Negative_normalized on CL2	C61H114O16P2	581.372	M581T443	581.372	581.373	7.3507	7.434	1.83311e+06	http://metlin.scripps.edu/metabo_list.php?mass_min=582.37854&mass_max=582.38203	0.784145	0.362966	0.467585	0.58884	0.265265	1.04938	0.417666	0.495332	0.311127	0.322968	0.603697	0.32242	0.685436	0.773441
MLCL2(52:4)		580.364	7.3789		4.01734	0.0118976	7.84053	0.404225	0.00565417	1	0.631178	0.0310242	1	0.709637	0.112078	1	0.834302	0.577449	1	1.27091	0.513734	0.802171	0.901886	1.06032	-0.376695	Negative_normalized on CL2	C61H112O16P2	580.364	M580T443	580.364	580.365	7.3347	7.4159	2.89908e+06	http://metlin.scripps.edu/metabo_list.php?mass_min=581.37054&mass_max=581.37402	1.2335	0.94021	1.11608	1.2642	0.898514	2.35353	1.09034	0.454667	0.708037	0.378499	1.10485	0.714116	0.542542	0.973034
MLCL2(52:5)		579.356	7.3661		3.45094	0.0223593	14.7347	0.233104	0.0277521	1	0.428015	0.0352964	1	0.492077	0.0695613	1	0.811294	0.805002	1	0.681562	0.158875	0.291719	0.335381	0.552947	-0.0926064	Negative_normalized on CL2	C61H110O16P2	579.356	M579T442	579.356	579.357	7.3324	7.4139	1.35354e+06	http://metlin.scripps.edu/metabo_list.php?mass_min=580.36255&mass_max=580.36602	0.449188	0.491593	0.507245	0.739979	0.625956	1.35255	0.604419	0.150274	0.255972	0.0703782	0.605353	0.297631	0.138153	0.266935
MLCL2(53:4)		587.372	7.3544		2.41006	0.0759702	50.0644	0.391394	0.0486012	1	0.829457	0.760229	1	0.656022	0.202173	1	0.95857	0.998402	1	0.343515	0.13445	0.284931	0.225353	0.329283	-0.363633	Negative_normalized on CL2	C62H114O16P2	587.372	M587T441	587.372	587.373	7.3276	7.4059	844629	http://metlin.scripps.edu/metabo_list.php?mass_min=588.37834&mass_max=588.38186	0.29413	0.173211	0.257256	0.441062	0.247871	0.69508	0.295991	0.129321	0.178443	0.0955848	0.440183	0.21162	0.171772	0.325129
MLCL2(54:3)		595.388	7.353		2.02959	0.120881	79.6604	1.05002	0.999989	1	1.90698	0.421021	1	1.90458	0.423402	1	2.67143	0.0524998	1	0.361548	0.379634	0.689463	0.688597	0.965849	-1.09764	Negative_normalized on CL2	C63H118O16P2	595.387	M595T441_2	595.388	595.389	7.3091	7.4278	1.94377e+06	http://metlin.scripps.edu/metabo_list.php?mass_min=596.3944&mass_max=596.39798	0.55501	0.190552	0.36486	0.372027	0.116191	0.505674	0.426522	0.421358	0.276898	0.440646	0.766826	0.295483	1.06369	0.862567
MLCL2(54:4)		594.38	7.3384		1.2544	0.314	206.926	0.807003	0.909218	1	1.36344	0.320849	1	1.20841	0.765203	1	1.15656	0.907422	1	1.80968	1.46041	2.46738	2.18684	2.093	-0.872432	Negative_normalized on CL2	C63H116O16P2	594.38	M594T440	594.38	594.381	7.2586	7.3924	6.16455e+06	http://metlin.scripps.edu/metabo_list.php?mass_min=595.38644&mass_max=595.39001	2.3714	1.35294	1.83258	2.26797	1.22135	1.92702	1.69448	1.73411	1.4602	1.18693	3.41867	1.37695	1.88337	3.60131
MLCL2(54:5)		593.372	7.3302		2.94992	0.0398907	26.288	0.517894	0.0596838	1	0.929915	0.972154	1	0.732777	0.243185	1	1.07642	0.967218	1	2.3451	1.21451	2.18074	1.71843	2.5243	-0.56219	Negative_normalized on CL2	C63H114O16P2	593.372	M593T440	593.372	593.373	7.2401	7.3748	6.3023e+06	http://metlin.scripps.edu/metabo_list.php?mass_min=594.37844&mass_max=594.382	2.20737	1.76471	2.04451	3.14027	1.84494	3.23921	2.17468	1.18273	1.60202	0.858783	3.77048	1.68463	0.948503	2.6915
MLCL2(54:6)		592.364	7.3166		2.53488	0.0653447	43.0622	0.330272	0.113879	1	0.675923	0.468354	1	0.611347	0.311165	1	1.12346	0.964871	1	1.10708	0.365638	0.748303	0.676812	1.24376	-0.385945	Negative_normalized on CL2	C63H112O16P2	592.364	M592T439	592.364	592.365	7.2771	7.3614	2.72155e+06	http://metlin.scripps.edu/metabo_list.php?mass_min=593.37051&mass_max=593.37406	1.05724	0.788423	0.833016	1.38669	0.967069	1.64954	1.06761	0.318566	0.514118	0.264231	1.59989	0.658674	0.308448	0.707225
MLCL2(56:5)		607.388	7.3022		2.48778	0.0691591	45.5758	0.913608	0.999552	1	2.06931	0.055993	1	1.63549	0.386342	1	1.90812	0.146702	1	0.198429	0.181286	0.410611	0.324529	0.378627	-0.944247	Negative_normalized on CL2	C65H118O16P2	607.387	M607T438	607.388	607.389	7.2624	7.3569	922378	http://metlin.scripps.edu/metabo_list.php?mass_min=608.39429&mass_max=608.39794	0.245484	0.126607	0.164838	0.210032	0.125577	0.271655	0.244812	0.231868	0.140042	0.171949	0.583492	0.180682	0.468902	0.538121
MLCL2(56:6)		606.38	7.2838		1.35752	0.276846	182.441	0.781072	0.769992	1	1.2061	0.635781	1	1.01069	0.999992	1	1.2451	0.526083	1	0.779181	0.608596	0.939768	0.787513	0.970159	-0.921132	Negative_normalized on CL2	C65H116O16P2	606.38	M606T437	606.38	606.381	7.2035	7.3264	2.51977e+06	http://metlin.scripps.edu/metabo_list.php?mass_min=607.38645&mass_max=607.39009	0.789325	0.655795	0.71387	0.777333	0.467769	1.41488	0.635298	0.737607	0.52367	0.56451	1.44169	0.588557	0.683416	1.01786
MLCL2(56:7)		605.372	7.2652		1.50518	0.230887	152.155	0.709228	0.568471	1	0.920552	0.979578	1	0.950611	0.996544	1	1.25284	0.504002	1	0.811343	0.575427	0.746883	0.771271	1.01648	-0.617121	Negative_normalized on CL2	C65H114O16P2	605.372	M605T436	605.372	605.373	7.2035	7.3066	2.45705e+06	http://metlin.scripps.edu/metabo_list.php?mass_min=606.37845&mass_max=606.38208	0.972602	0.574284	0.760098	0.831399	0.677698	1.06488	0.79844	0.664948	0.572972	0.488362	1.37962	0.575839	0.521796	0.668041
MLCL2(56:8)		604.364	7.2647		1.18624	0.341066	224.763	0.64811	0.722632	1	0.750797	0.778373	1	1.04475	0.999493	1	1.26257	0.771227	1	0.24007	0.155592	0.180244	0.250813	0.303104	-0.262458	Negative_normalized on CL2	C65H112O16P2	604.364	M604T436	604.364	604.365	7.167	7.4162	702317	http://metlin.scripps.edu/metabo_list.php?mass_min=605.3704&mass_max=605.37403	0.340632	0.180745	0.351862	0.184603	0.182179	0.154924	0.285546	0.131879	0.159549	0.175348	0.386472	0.119081	0.116781	0.100696
MLCL2(58:7)		619.388	7.235		5.32352	0.00305115	2.01071	0.744817	0.611867	1	0.279755	0.000893077	0.590628	0.878158	0.888775	1	0.796335	0.619874	1	0.472602	0.352002	0.132213	0.415019	0.376349	-0.231719	Negative_normalized on CL2	C67H118O16P2	619.387	M619T434	619.385	619.388	7.1662	7.2752	1.08026e+06	http://metlin.scripps.edu/metabo_list.php?mass_min=620.39383&mass_max=620.39754	0.276755	0.41743	0.64926	0.465968	0.44464	0.69549	0.35867	0.387803	0.601695	0.0665083	0.373465	0.0620241	0.0796194	0.0846042
MLCL2(58:8)		618.38	7.2273		1.97352	0.129514	85.3496	0.67372	0.790022	1	1.45376	0.332975	1	1.07847	0.996054	1	1.48579	0.309349	1	0.136965	0.0922763	0.199115	0.147713	0.203502	0.0508488	Negative_normalized on CL2	C67H116O16P2	618.38	M618T434	618.379	618.38	7.124	7.2988	482402	http://metlin.scripps.edu/metabo_list.php?mass_min=619.38582&mass_max=619.38953	0.167532	0.146749	0.0640262	0.152197	0.101385	0.148941	0.177927	0.0475589	0.133475	0.0957948	0.404702	0.122473	0.0854059	0.17331
PA(28:0)		591.403	8.815		1	1	1	1	1	1	1	1	1	1	1	1	1	1	1	500	500	500	500	500	-0.00077798	Negative_normalized on PA	C31H61O8P1	591.403	M591T529	591.403	591.404	8.7693	8.8759	1.64096e+08	http://metlin.scripps.edu/metabo_list.php?mass_min=592.40943&mass_max=592.41298	500	500	500	500	500	500	500	500	500	500	500	500	500	500
PA(30:0)		619.435	8.7959		3.62037	0.0184648	12.1683	0.43589	0.0203848	1	0.638628	0.0651122	1	0.58554	0.0289045	1	0.848383	0.724855	1	8.34619	3.63802	5.33011	4.88703	7.08076	-0.161974	Negative_normalized on PA	C33H65O8P1	619.434	M619T528	619.435	619.435	8.7513	8.861	2.07873e+06	http://metlin.scripps.edu/metabo_list.php?mass_min=620.44074&mass_max=620.44446	7.77159	6.2558	4.82815	8.35757	8.023	13.4657	9.72149	3.72525	4.09444	3.09438	6.8236	3.74579	4.06807	7.81633
PA(31:0)		633.45	8.7843		2.15744	0.103333	68.0967	0.544493	0.0971767	1	0.669886	0.130439	1	0.65308	0.105053	1	0.827414	0.673832	1	3.13432	1.70662	2.09964	2.04697	2.59338	-0.0951426	Negative_normalized on PA	C34H67O8P1	633.45	M633T527	633.45	633.451	8.6945	8.8372	855498	http://metlin.scripps.edu/metabo_list.php?mass_min=634.45631&mass_max=634.46011	4.6365	1.73199	2.22492	1.76425	3.10928	3.94091	4.53242	2.19154	1.21023	1.71808	2.97481	1.55884	1.66526	2.57554
PA(31:1)		631.435	8.7459		2.07592	0.114193	75.2532	1.46122	0.964731	1	2.19528	0.293233	1	1.89902	0.538911	1	0.32269	0.775805	1	1.69907	2.48272	3.72994	3.22656	0.548272	0.110333	Negative_normalized on PA	C34H65O8P1	631.434	M631T525	631.434	631.435	8.6766	8.8086	676747	http://metlin.scripps.edu/metabo_list.php?mass_min=632.44054&mass_max=632.44433	0.72014	1.24546	4.7941	0.451729	1.30785	1.21278	2.16142	6.51274	0.439877	0.495535	5.26449	0.291667	0.559957	5.48002
PA(32:0)		647.466	8.7692		3.75299	0.0159213	10.4921	0.513536	0.00794567	1	0.758753	0.12281	1	0.682903	0.0280946	1	0.835582	0.442007	1	34.7939	17.8679	26.4	23.7609	29.0732	-0.355546	Negative_normalized on PA	C35H69O8P1	647.466	M647T526	647.466	647.466	8.7333	8.821	9.26615e+06	http://metlin.scripps.edu/metabo_list.php?mass_min=648.47209&mass_max=648.47597	42.4337	26.8574	19.5292	36.9409	34.9973	46.3678	36.4307	20.0491	16.394	17.1606	31.3332	15.6219	29.0688	35.7954
PA(32:1)		645.451	8.7552		8.28154	0.000213482	0.140685	0.511992	0.00658834	1	0.407135	3.5792e-05	0.0210635	0.687638	0.0269036	1	0.605741	0.00616706	1	29.5587	15.1338	12.0344	20.3257	17.9049	-0.418728	Negative_normalized on PA	C35H67O8P1	645.45	M645T525	645.45	645.451	8.6945	8.8074	6.6306e+06	http://metlin.scripps.edu/metabo_list.php?mass_min=646.45649&mass_max=646.46036	26.0567	22.8603	20.8889	31.5773	27.8858	31.2157	46.4258	16.0604	15.8185	13.5226	12.0673	11.1136	9.66616	12.9265
PA(32:2)		643.435	8.7454		7.5529	0.000391908	0.258267	0.357196	0.0123728	1	0.247522	0.000182764	0.139766	0.777867	0.436691	1	0.459167	0.00883636	1	3.36095	1.20052	0.831908	2.61437	1.54324	-0.52893	Negative_normalized on PA	C35H65O8P1	643.434	M643T525	643.435	643.435	8.6588	8.781	720514	http://metlin.scripps.edu/metabo_list.php?mass_min=644.44091&mass_max=644.44478	2.60895	2.67686	2.83331	2.38062	3.07484	3.73761	6.21445	1.55407	0.724068	1.32342	0.559102	0.95115	0.348858	0.992642
PA(33:0)		661.482	8.7546		4.70127	0.00574206	3.78402	0.465212	0.0282248	1	0.885197	0.852261	1	0.547561	0.0151266	1	1.00758	0.999996	1	2.73116	1.27057	2.41761	1.49548	2.75186	-0.650268	Negative_normalized on PA	C36H71O8P1	661.481	M661T525	661.482	661.482	8.6766	8.7989	786169	http://metlin.scripps.edu/metabo_list.php?mass_min=662.48789&mass_max=662.49186	3.96479	1.72563	1.44749	2.62581	2.35356	3.38355	3.61726	1.93211	0.586185	1.29341	3.45271	1.5755	2.78206	2.60761
PA(33:1)		659.466	8.7303		1.75438	0.169725	111.849	0.575695	0.17086	1	0.66565	0.160054	1	0.914483	0.961129	1	0.762718	0.464299	1	7.79478	4.48741	5.18859	7.12819	5.94522	-0.713007	Negative_normalized on PA	C36H69O8P1	659.466	M659T524_2	659.466	659.467	8.6945	8.7989	2.08802e+06	http://metlin.scripps.edu/metabo_list.php?mass_min=660.47229&mass_max=660.47625	7.06201	6.197	5.57325	6.50738	7.69557	8.93469	12.5936	4.16739	5.84144	3.45342	5.79705	4.49455	3.16823	5.87502
PA(34:0)		675.497	8.7568		4.77447	0.00532258	3.50758	0.376256	0.0223875	1	0.985475	0.999956	1	0.508687	0.0198818	1	0.931288	0.984172	1	8.31657	3.12916	8.19577	4.23053	7.74512	-0.10374	Negative_normalized on PA	C37H73O8P1	675.497	M675T525	675.497	675.498	8.7274	8.7989	2.29522e+06	http://metlin.scripps.edu/metabo_list.php?mass_min=676.50314&mass_max=676.50719	11.4641	4.32658	4.24275	8.6889	7.41292	10.3064	11.7743	3.92526	2.2703	3.19193	10.6962	5.764	10.8983	7.73527
PA(34:1)		673.482	8.7288		4.33747	0.00842205	5.55013	0.439915	0.00360452	1	0.688916	0.0436934	1	0.686173	0.0414204	1	0.832226	0.468545	1	93.4783	41.1226	64.3987	64.1423	77.7951	-0.193235	Negative_normalized on PA	C37H71O8P1	673.481	M673T524	673.482	673.482	8.6913	8.7905	2.35401e+07	http://metlin.scripps.edu/metabo_list.php?mass_min=674.48756&mass_max=674.4916	83.4379	69.2014	62.9098	108.118	88.6409	102.533	139.507	44.1707	37.1064	42.0905	68.8873	65.8415	47.4071	71.8066
PA(34:2)		671.467	8.7154		5.00049	0.00422171	2.7821	0.446789	0.00764037	1	0.505837	0.00212932	1	0.728872	0.126985	1	0.695025	0.089523	1	23.1122	10.3263	11.691	16.8459	16.0636	-0.968335	Negative_normalized on PA	C37H69O8P1	671.466	M671T523	671.466	671.467	8.6732	8.7905	5.45517e+06	http://metlin.scripps.edu/metabo_list.php?mass_min=672.47244&mass_max=672.47646	17.4688	19.0399	16.569	21.7478	25.7227	20.6689	40.5686	11.7651	9.86819	9.34559	12.3138	14.73	7.71903	12.1352
PA(34:3)		669.451	8.7105		5.39834	0.0028331	1.86701	0.477112	0.0523255	1	0.34016	0.00106304	0.659984	0.800968	0.542231	1	0.553667	0.0374567	1	2.7146	1.29517	0.923399	2.17431	1.50299	-0.986284	Negative_normalized on PA	C37H67O8P1	669.45	M669T523	669.45	669.451	8.6039	8.7573	622497	http://metlin.scripps.edu/metabo_list.php?mass_min=670.4568&mass_max=670.46081	1.67706	2.15545	2.01682	2.44708	3.01936	2.56236	5.12408	1.40655	1.19717	1.28179	0.803649	1.50084	0.47205	0.555313
PA(35:1)		687.498	8.7284		1.6682	0.188797	124.417	0.558199	0.0994076	1	0.893809	0.894256	1	0.813099	0.558572	1	0.992398	0.999996	1	5.63848	3.14739	5.03972	4.58464	5.59561	-0.320112	Negative_normalized on PA	C38H73O8P1	687.497	M687T524	687.497	687.498	8.6511	8.7632	1.68247e+06	http://metlin.scripps.edu/metabo_list.php?mass_min=688.50326&mass_max=688.50738	5.91419	4.40877	3.66114	5.51708	5.53201	4.91481	9.52135	3.89411	1.88454	3.66353	6.44436	4.81152	4.13413	5.45631
PA(35:15)		659.277	8.7263		2.26566	0.090538	59.6646	3.48705	0.0552779	1	1.11827	0.999581	1	1.26129	0.991035	1	0.647687	0.97685	1	1.04407	3.64071	1.16755	1.31686	0.676228	2.42542	Negative_normalized on PA	C38H45O8P1	659.278	M659T524_1	659.276	659.277	8.6926	8.7989	418636	http://metlin.scripps.edu/metabo_list.php?mass_min=660.28242&mass_max=660.28637	1.65405	1.58201	0.800018	1.00864	0.680739	1.09881	0.484192	2.95546	0.172667	7.794	0.799894	0.159657	3.93022	0.135195
PA(35:2)		685.482	8.7068		2.89554	0.0425258	28.0245	0.463242	0.0478348	1	0.537421	0.0245719	1	0.691662	0.188868	1	0.773137	0.472026	1	3.22585	1.49435	1.73364	2.2312	2.49402	-0.321147	Negative_normalized on PA	C38H71O8P1	685.481	M685T522_2	685.481	685.482	8.655	8.7632	821972	http://metlin.scripps.edu/metabo_list.php?mass_min=686.48762&mass_max=686.49173	2.45194	2.73212	1.97171	2.9159	3.24737	4.05361	5.20828	1.83964	1.18223	1.46117	1.88294	2.78028	0.896152	1.37005
PA(36:1)		701.513	8.71		1.14164	0.359915	237.184	0.588407	0.187314	1	0.821596	0.663189	1	0.842002	0.746987	1	0.746743	0.40251	1	37.8134	22.2497	31.0673	31.839	28.2369	-0.470429	Negative_normalized on PA	C39H75O8P1	701.513	M702T523	701.513	701.513	8.6588	8.7545	1.03437e+07	http://metlin.scripps.edu/metabo_list.php?mass_min=702.51897&mass_max=702.52318	39.7282	26.5602	23.9582	41.455	35.0488	30.264	67.6796	25.7555	18.2042	22.7894	38.6629	22.7562	27.7484	29.7857
PA(36:2)		699.498	8.6824		2.16675	0.102162	67.3249	0.501901	0.0538865	1	0.704333	0.181137	1	0.701693	0.175566	1	0.83828	0.702156	1	34.7755	17.4539	24.4935	24.4017	29.1516	-0.500468	Negative_normalized on PA	C39H73O8P1	699.497	M699T521	699.498	699.498	8.652	8.7392	9.04608e+06	http://metlin.scripps.edu/metabo_list.php?mass_min=700.50335&mass_max=700.50755	28.801	25.4249	21.921	38.2374	28.7488	40.4494	59.8461	20.7153	14.9562	16.6901	27.3297	28.1213	18.0265	25.7848
PA(36:3)		697.482	8.6827		1.92494	0.137502	90.614	0.578973	0.114888	1	0.690559	0.14336	1	0.770783	0.366922	1	0.907222	0.936158	1	10.2654	5.94341	7.08889	7.91242	9.31304	-0.674054	Negative_normalized on PA	C39H71O8P1	697.481	M697T521	697.482	697.482	8.6177	8.9822	2.83471e+06	http://metlin.scripps.edu/metabo_list.php?mass_min=698.48783&mass_max=698.49201	8.62065	7.66035	7.96164	9.4724	10.5974	8.99712	18.5486	7.968	4.91802	4.94422	7.17951	11.262	5.51952	5.82544
PA(36:4)		695.466	8.6561		3.1341	0.0321724	21.2016	0.381805	0.0352207	1	0.470692	0.0179467	1	0.719662	0.331654	1	0.679915	0.256677	1	14.5788	5.56624	6.8621	10.4918	9.91231	-0.503553	Negative_normalized on PA	C39H69O8P1	695.466	M695T519	695.466	695.466	8.5864	8.7185	3.41387e+06	http://metlin.scripps.edu/metabo_list.php?mass_min=696.47206&mass_max=696.47624	22.4094	8.23005	6.02548	16.8484	15.9	11.5013	21.1367	7.93736	3.75521	5.00614	6.60969	7.49984	6.44644	5.17185
PA(36:5)		693.451	8.6489		8.05707	0.00025665	0.169132	0.285291	0.00911633	1	0.225035	0.000336512	0.240178	0.794036	0.562061	1	0.329205	0.00233221	1	4.76677	1.35992	1.07269	3.78499	1.56925	-0.692577	Negative_normalized on PA	C39H67O8P1	693.45	M693T519	693.45	693.451	8.6017	8.7185	908029	http://metlin.scripps.edu/metabo_list.php?mass_min=694.45655&mass_max=694.46071	4.47882	2.86569	2.3073	5.99775	5.19836	5.34758	7.17191	1.80827	0.927041	1.34444	0.884128	1.60843	1.07624	0.747978
PA(37:1)		715.529	8.676		2.85427	0.0446479	29.423	0.51197	0.764139	1	2.02305	0.0568499	1	1.17785	0.978094	1	1.43964	0.691136	1	0.222773	0.114053	0.450681	0.262394	0.320713	-0.656785	Negative_normalized on PA	C40H77O8P1	715.528	M716T521	715.528	715.529	8.6425	8.7296	96807.4	http://metlin.scripps.edu/metabo_list.php?mass_min=716.53473&mass_max=716.53902	0.254626	0.180873	0.206689	0.184944	0.10616	0.184111	0.44201	0.0400563	0.117502	0.184602	0.752845	0.218788	0.250258	0.469329
PA(37:4)		709.482	8.627		0.434413	0.782446	515.632	1.24622	0.999356	1	0.805581	0.999305	1	0.216624	0.888826	1	1.65	0.946127	1	6.50083	8.10144	5.23695	1.40824	10.7264	-0.563989	Negative_normalized on PA	C40H71O8P1	709.481	M709T518	709.481	709.483	8.5771	8.7274	1.44541e+06	http://metlin.scripps.edu/metabo_list.php?mass_min=710.48772&mass_max=710.49197	2.73221	2.09719	27.8216	3.52649	3.08691	1.58285	4.65858	2.26243	20.5979	1.44396	1.57352	0.511931	1.39699	0.622679
PA(38:1)		729.545	8.6674		6.44911	0.00104112	0.686101	0.388315	0.430564	1	2.15941	0.00540297	1	0.844172	0.971917	1	1.15033	0.978584	1	0.28324	0.109986	0.61163	0.239103	0.325819	-0.753736	Negative_normalized on PA	C41H79O8P1	729.544	M730T520	729.544	729.545	8.6401	8.7255	108518	http://metlin.scripps.edu/metabo_list.php?mass_min=730.55041&mass_max=730.55479	0.183371	0.201308	0.15933	0.728487	0.248198	0.168301	0.293683	0.154047	0.12151	0.0544008	0.991304	0.39991	0.392174	0.784629
PA(38:3)		725.513	8.6548		1.88454	0.144526	95.2424	0.462061	0.107545	1	0.623774	0.164016	1	0.611338	0.144353	1	0.744786	0.509156	1	17.1632	7.93044	10.7059	10.4925	12.7829	-0.537567	Negative_normalized on PA	C41H75O8P1	725.513	M726T519	725.513	725.513	8.5951	8.7365	4.11484e+06	http://metlin.scripps.edu/metabo_list.php?mass_min=726.51897&mass_max=726.52332	17.9517	10.4673	3.05739	24.1021	21.2761	13.3339	29.9537	9.69777	6.31453	7.77901	16.8825	9.05946	8.07921	9.31207
PA(38:4)		723.498	8.6194		3.68182	0.0172363	11.3587	0.541507	0.183965	1	0.355492	0.00519899	1	0.628674	0.155722	1	0.462325	0.0288706	1	133.724	72.4128	47.538	84.0691	61.8242	-0.525332	Negative_normalized on PA	C41H73O8P1	723.497	M723T517	723.497	723.498	8.5859	8.6637	2.71196e+07	http://metlin.scripps.edu/metabo_list.php?mass_min=724.50331&mass_max=724.50765	218.272	96.383	39.3976	164.588	130.925	62.5949	223.911	100.735	44.4389	72.0643	80.2709	32.5297	62.3079	30.5302
PA(38:5)		721.482	8.6218		2.29105	0.0877809	57.8476	0.636658	0.188201	1	0.63162	0.0563709	1	0.718836	0.188574	1	0.633148	0.0711839	1	28.0677	17.8695	17.7281	20.1761	17.771	-0.804095	Negative_normalized on PA	C41H71O8P1	721.481	M721T517	721.482	721.482	8.5896	8.6819	6.84539e+06	http://metlin.scripps.edu/metabo_list.php?mass_min=722.48787&mass_max=722.4922	35.8275	22.3057	12.2256	33.8244	24.7581	25.4135	42.119	24.0829	11.7572	17.7684	18.2442	21.7269	17.0427	11.922
PA(38:6)		719.467	8.6218		3.41176	0.0233784	15.4064	0.497478	0.035968	1	0.55879	0.0154056	1	0.785031	0.384962	1	0.644589	0.0751458	1	9.70848	4.82975	5.425	7.62146	6.25798	-0.862034	Negative_normalized on PA	C41H69O8P1	719.466	M719T517	719.466	719.467	8.5896	8.7513	2.35865e+06	http://metlin.scripps.edu/metabo_list.php?mass_min=720.47226&mass_max=720.47658	9.92065	7.73804	4.66815	12.6646	7.21224	12.3465	13.4092	5.55783	3.68506	5.24637	5.61762	8.24771	5.20857	5.5147
PA(39:4)		737.513	8.6048		1.00352	0.424327	279.631	2.47699	0.797973	1	1.94348	0.883286	1	3.42515	0.213563	1	1.55087	0.98336	1	3.44255	8.52718	6.69053	11.7913	5.33895	-1.64065e-05	Negative_normalized on PA	C42H75O8P1	737.513	M738T516	737.512	737.514	8.5657	8.6688	2.13224e+06	http://metlin.scripps.edu/metabo_list.php?mass_min=738.51854&mass_max=738.52296	1.2333	0.538239	0.202127	0.585931	19.8638	0.529953	1.14456	0.95012	10.7349	13.8965	1.25731	11.1998	0.787745	17.0224
PA(40:2)		755.56	8.6511		18.7477	3.09551e-07	0.000203994	0.373666	0.45398	1	3.17056	2.68861e-06	0.0072999	0.614299	0.646342	1	1.72055	0.169908	1	0.174922	0.0653623	0.5546	0.107454	0.300962	-0.568876	Negative_normalized on PA	C43H81O8P1	755.56	M756T519	755.56	755.561	8.6016	8.6928	80711.3	http://metlin.scripps.edu/metabo_list.php?mass_min=756.56586&mass_max=756.5704	0.122555	0.137807	0.0543256	0.307925	0.142408	0.282526	0.176906	0.108288	0.042535	0.0452642	0.620657	0.379576	0.603374	0.681842
PA(40:3)		753.545	8.6335		24.297	2.66387e-08	1.75549e-05	1.08892	0.999853	1	5.48335	3.87132e-08	2.17743e-05	0.847241	0.996666	1	3.53405	0.000807494	0.608186	0.272399	0.29662	1.49366	0.230787	0.962672	-0.437777	Negative_normalized on PA	C43H79O8P1	753.544	M754T518	753.544	753.545	8.5995	8.6578	220302	http://metlin.scripps.edu/metabo_list.php?mass_min=754.55012&mass_max=754.55464	0.367609	0.159872	0.0552612	0.37832	0.198644	0.343459	0.403627	0.451362	0.248067	0.190432	2.13911	1.16218	0.959711	1.47769
PA(40:4)		751.529	8.6159		11.3183	2.21902e-05	0.0146233	1.16227	0.992319	1	2.98426	4.92399e-05	0.0415222	0.747857	0.911683	1	1.93965	0.0790217	1	3.74136	4.34847	11.1652	2.79801	7.25694	-0.545486	Negative_normalized on PA	C43H77O8P1	751.528	M752T517	751.529	751.529	8.5809	8.6399	1.9391e+06	http://metlin.scripps.edu/metabo_list.php?mass_min=752.53455&mass_max=752.53906	5.47169	3.966	2.23633	3.87509	3.18426	3.02119	4.435	5.09088	2.79675	5.15776	19.5197	6.59561	9.61514	7.92146
PA(40:5)		749.513	8.6109		1.23592	0.321135	211.628	0.792218	0.769344	1	1.02775	0.99954	1	0.704044	0.283448	1	0.829957	0.760343	1	10.9642	8.68606	11.2685	7.7193	9.09984	-0.466986	Negative_normalized on PA	C43H75O8P1	749.513	M750T517	749.513	749.514	8.5853	8.6454	3.06429e+06	http://metlin.scripps.edu/metabo_list.php?mass_min=750.51885&mass_max=750.52335	14.9865	7.84422	4.62815	16.2853	11.0947	7.28994	14.6208	11.6504	5.58904	8.8187	14.1414	9.6967	9.83043	9.46882
PA(40:6)		747.498	8.6025		0.988928	0.431684	284.48	0.696906	0.454625	1	0.862264	0.834753	1	0.743915	0.378498	1	0.722776	0.344619	1	9.69885	6.75919	8.36298	7.21513	7.0101	-0.949938	Negative_normalized on PA	C43H73O8P1	747.497	M747T516	747.498	747.498	8.5676	8.6819	2.54986e+06	http://metlin.scripps.edu/metabo_list.php?mass_min=748.50357&mass_max=748.50806	10.2693	6.73604	3.4529	15.6222	8.82382	10.3932	12.5945	7.47952	5.43765	7.36039	8.54872	9.53166	6.15276	8.53216
PA(40:7)		745.483	8.5954		0.535273	0.711063	468.591	0.562405	0.496672	1	0.958068	0.999485	1	0.817022	0.887454	1	0.889853	0.982216	1	2.61989	1.47344	2.51003	2.14051	2.33131	-1.42209	Negative_normalized on PA	C43H71O8P1	745.481	M745T516	745.482	745.483	8.5497	8.663	758575	http://metlin.scripps.edu/metabo_list.php?mass_min=746.48828&mass_max=746.49275	2.16804	2.15799	1.41519	2.29096	0.836915	5.08505	4.38506	1.77052	1.2965	1.35328	1.52768	4.65948	1.49198	1.39867
PA(42:1)		785.607	8.636		20.3728	1.43454e-07	9.45362e-05	1.06345	0.999995	1	7.47589	1.08354e-06	0.00632864	1.54179	0.951538	1	6.95846	9.20555e-06	0.00904477	0.256941	0.273243	1.92087	0.396151	1.78792	-0.775996	Negative_normalized on PA	C45H87O8P1	785.607	M786T518	785.607	785.608	8.5809	8.6773	338684	http://metlin.scripps.edu/metabo_list.php?mass_min=786.6129&mass_max=786.61762	0.269338	0.155474	0.0878311	0.277724	0.0416967	0.30558	0.660945	0.394486	0.239729	0.185515	2.52729	1.70765	1.65762	1.98296
PA(42:2)		783.591	8.6335		15.9014	1.34838e-06	0.000888585	1.44191	0.99829	1	11.2175	1.93449e-06	0.000785937	1.53968	0.9903	1	6.26111	0.00964858	1	0.116302	0.167696	1.30461	0.179067	0.728177	-0.267604	Negative_normalized on PA	C45H85O8P1	783.591	M784T518	783.591	783.592	8.603	8.6773	170457	http://metlin.scripps.edu/metabo_list.php?mass_min=784.59686&mass_max=784.60156	0.140012	0.022906	0.134693	0.187194	0.0392879	0.178106	0.111912	0.248203	0.187734	0.0671519	1.81064	0.907774	0.954172	1.26585
PA(42:3)		781.576	8.6187		24.762	2.21314e-08	1.45846e-05	1.93661	0.998786	1	30.2699	3.38169e-09	5.40642e-06	1.52396	0.999662	1	14.3981	0.00432773	1	0.0237774	0.0460476	0.719741	0.0362359	0.34235	-0.626627	Negative_normalized on PA	C45H83O8P1	781.575	M782T517	781.575	781.576	8.5937	8.6755	79007.5	http://metlin.scripps.edu/metabo_list.php?mass_min=782.5815&mass_max=782.58619	0	0	0.0362955	0	0.0559956	0.0230743	0.0510766	0.0859627	0.0325875	0.0195924	1.14879	0.624439	0.402492	0.505447
PA(42:4)		779.56	8.6193		11.7895	1.61441e-05	0.010639	2.08926	0.918843	1	8.31876	1.87072e-05	0.0103394	0.750269	0.999069	1	4.72244	0.0357946	1	0.209428	0.43755	1.74218	0.157127	0.98901	-0.525707	Negative_normalized on PA	C45H81O8P1	779.56	M780T517	779.56	779.561	8.5717	8.6511	222950	http://metlin.scripps.edu/metabo_list.php?mass_min=780.56577&mass_max=780.57045	0.271297	0.207326	0.154325	0.179374	0.103436	0.177966	0.372271	0.594392	0.256173	0.462084	1.84084	1.24285	1.06833	0.727349
PA(44:1)		813.639	8.6076		14.1922	3.57034e-06	0.00235285	2.78315	0.999778	1	52.5942	0.000159757	0.0890976	7.16632	0.938434	1	61.3342	2.67132e-05	0.0124241	0.0208411	0.058004	1.09612	0.149354	1.27827	-0.773686	Negative_normalized on PA	C47H91O8P1	813.638	M814T516	813.638	813.639	8.5877	8.6399	189290	http://metlin.scripps.edu/metabo_list.php?mass_min=814.64414&mass_max=814.64902	0	0	0.0241294	0	0.0435242	0	0.0782343	0.0897299	0.0456656	0.0386164	1.83279	0.677935	0.574811	1.22301
PA(44:3)		809.607	8.6054		21.9756	7.01696e-08	4.62418e-05	2.83478	0.952973	1	21.8319	8.84618e-08	3.11769e-06	3.16256	0.82666	1	12.3739	0.00104759	0.676195	0.0264002	0.0748388	0.576366	0.0834922	0.326674	-0.172464	Negative_normalized on PA	C47H87O8P1	809.607	M810T516	809.607	809.608	8.5537	8.6209	72058.8	http://metlin.scripps.edu/metabo_list.php?mass_min=810.61236&mass_max=810.61722	0.0789561	0	0	0.0523878	0	0.0292715	0.024186	0.16664	0.0326624	0.0252136	0.747173	0.436669	0.38196	0.645434
PC(28:0)		678.507	9.1912		1	1	1	1	1	1	1	1	1	1	1	1	1	1	1	2000	2000	2000	2000	2000	-0.0268146	Positive_normalized on PC	C36H72O8P1N1	678.507	M679T551	678.507	678.507	9.189	9.2268	3.27548e+09	http://metlin.scripps.edu/metabo_list.php?mass_min=677.49702&mass_max=677.50109	2000	2000	2000	2000	2000	2000	2000	2000	2000	2000	2000	2000	2000	2000
PC(28:1)		676.491	9.19		2.02312	0.121847	75.6673	0.658591	0.898018	1	1.66087	0.268214	1	0.736196	0.898836	1	0.854654	0.988686	1	2.10618	1.38711	3.49808	1.55056	1.80006	-0.115682	Positive_normalized on PC	C36H70O8P1N1	676.491	M676T551	676.491	676.491	9.1712	9.2255	3.4109e+06	http://metlin.scripps.edu/metabo_list.php?mass_min=675.48143&mass_max=675.48549	1.41181	1.69728	1.19745	2.19586	2.43471	4.0005	1.80564	0.942651	2.10117	1.11751	0.959529	1.79373	3.41057	1.86538
PC(29:0)		692.522	9.1727		1.69924	0.181691	112.83	0.926953	0.970575	1	1.10023	0.818767	1	0.990183	0.999966	1	1.24317	0.17626	1	61.7165	57.2083	67.9023	61.1107	76.7239	0.464779	Positive_normalized on PC	C37H74O8P1N1	692.522	M693T550	692.522	692.522	9.1547	9.2089	1.08917e+08	http://metlin.scripps.edu/metabo_list.php?mass_min=691.51228&mass_max=691.51644	71.7965	59.9163	51.8295	61.6225	73.2662	66.0921	47.4925	54.7777	65.8888	50.9583	86.0457	49.9633	64.4502	86.7945
PC(30:0)		706.538	9.1544		1.24796	0.316471	196.528	0.831246	0.608703	1	0.982573	0.99959	1	0.899855	0.791187	1	1.1094	0.763268	1	993.094	825.506	975.787	893.641	1101.74	0.342422	Positive_normalized on PC	C38H76O8P1N1	706.538	M707T549	706.538	706.538	9.1356	9.1901	1.60691e+09	http://metlin.scripps.edu/metabo_list.php?mass_min=705.52797&mass_max=705.53221	1074.43	1044.63	739.435	1024.02	1178.05	1192.21	698.882	805.771	951.576	719.171	1235.4	747.651	756.291	1327.99
PC(30:1)		704.522	9.1214		5.64583	0.00222311	1.38055	0.935149	0.958683	1	0.613509	0.00136134	0.902508	0.992872	0.999977	1	0.850036	0.384287	1	115.992	108.47	71.1624	115.166	98.5977	0.201371	Positive_normalized on PC	C38H74O8P1N1	704.522	M705T547_1	704.522	704.522	9.0999	9.1544	1.65994e+08	http://metlin.scripps.edu/metabo_list.php?mass_min=703.51243&mass_max=703.51666	119.813	123.924	110.081	98.4976	130.2	127.192	102.24	96.5781	136.914	91.9184	88.4616	58.8002	54.8946	87.3162
PC(30:2)		702.507	9.1185		0.129064	0.970413	602.626	1.02566	0.999995	1	1.16339	0.982825	1	1.10796	0.996365	1	1.27067	0.915479	1	4.74329	4.865	5.51828	5.25538	6.02717	0.372674	Positive_normalized on PC	C38H72O8P1N1	702.507	M703T547	702.506	702.507	9.0817	9.1544	8.84299e+06	http://metlin.scripps.edu/metabo_list.php?mass_min=701.49666&mass_max=701.50088	4.22256	4.55504	3.41169	3.61566	5.04859	8.36232	3.98715	3.94029	6.91351	3.7412	1.2544	0.922704	9.02573	8.56556
PC(31:0)		720.554	9.1355		0.558831	0.694573	431.33	0.975893	0.999493	1	1.04888	0.979951	1	1.13274	0.60839	1	1.1096	0.771096	1	363.508	354.745	381.278	411.759	403.349	0.294216	Positive_normalized on PC	C39H78O8P1N1	720.554	M721T548	720.553	720.554	9.0999	9.1544	6.34663e+08	http://metlin.scripps.edu/metabo_list.php?mass_min=719.54361&mass_max=719.54793	529.966	380.324	273.311	365.271	360.419	364.359	270.907	396.046	321.555	346.634	462.969	292.885	387.105	397.17
PC(31:1)		718.538	9.1012		20.9976	1.08028e-07	6.70854e-05	1.01941	0.99816	1	0.599969	4.19697e-06	0.00478104	1.14479	0.114832	1	0.78122	0.0125696	1	89.2361	90.968	53.5389	102.157	69.7131	-0.0390597	Positive_normalized on PC	C39H76O8P1N1	718.538	M719T546	718.538	718.538	9.0817	9.1366	1.30197e+08	http://metlin.scripps.edu/metabo_list.php?mass_min=717.5282&mass_max=717.53252	114.392	88.1151	86.481	75.9233	89.9346	79.8167	89.9908	89.6414	100.066	83.1965	59.7946	43.0676	53.8535	57.2382
PC(32:0)		734.569	9.1011		0.371241	0.826846	513.471	0.876344	0.781952	1	0.935706	0.933034	1	1.0169	0.999538	1	0.963602	0.992297	1	2086.99	1828.92	1952.81	2122.26	2011.03	0.792385	Positive_normalized on PC	C40H80O8P1N1	734.569	M735T546_1	734.569	734.569	9.0817	9.1366	3.33579e+09	http://metlin.scripps.edu/metabo_list.php?mass_min=733.55884&mass_max=733.56325	2496.64	2347.87	1415.95	2188.6	2126.27	2602.12	1431.47	2064.24	1699.71	1722.81	2502.11	1534.86	1609.21	2258.02
PC(32:1)		732.554	9.0663		31.9919	1.68202e-09	1.04453e-06	1.03182	0.972381	1	0.610098	7.15454e-08	0.000166647	1.13061	0.062168	1	0.75824	0.000471837	0.332151	1395.93	1440.34	851.655	1578.25	1058.45	0.139236	Positive_normalized on PC	C40H78O8P1N1	732.554	M733T544	732.553	732.554	9.0467	9.1188	2.04056e+09	http://metlin.scripps.edu/metabo_list.php?mass_min=731.54368&mass_max=731.54808	1608.56	1514.4	1292.98	1256.39	1443.58	1365.19	1290.42	1404.78	1560.81	1355.43	1022.65	684.494	684.166	954.278
PC(32:2)		730.538	9.0472		53.7984	6.36147e-12	3.95047e-09	1.0772	0.73657	1	0.387207	3.02266e-11	6.22999e-09	1.09955	0.321425	1	0.536633	2.03242e-07	0.000299637	148.028	159.457	57.3175	162.764	79.4368	0.0847787	Positive_normalized on PC	C40H76O8P1N1	730.538	M731T543	730.538	730.538	8.9757	9.0969	1.92148e+08	http://metlin.scripps.edu/metabo_list.php?mass_min=729.52808&mass_max=729.53246	153.074	168.799	155.918	127.054	146.762	137.069	147.522	149.723	182.786	145.86	67.3001	48.5287	40.9033	67.6739
PC(33:0)		748.584	9.082		0.634757	0.642435	398.952	0.912173	0.94856	1	1.09399	0.85782	1	1.10575	0.802335	1	0.987469	0.99993	1	123.55	112.699	135.163	136.616	122.002	0.844428	Positive_normalized on PC	C41H82O8P1N1	748.585	M749T545	748.584	748.585	9.0091	9.1187	2.12477e+08	http://metlin.scripps.edu/metabo_list.php?mass_min=747.57441&mass_max=747.5789	140.89	137.047	104.23	129.82	109.501	141.685	101.678	129.643	98.8204	109.634	175.049	118.795	115.893	160.832
PC(33:1)		746.569	9.0302		8.94579	0.000125633	0.0780178	1.08021	0.753361	1	0.822596	0.037681	1	1.19776	0.0180685	1	0.96436	0.959345	1	334.125	360.927	274.85	400.201	322.217	0.431389	Positive_normalized on PC	C41H80O8P1N1	746.569	M747T542	746.569	746.569	9.0091	9.0667	5.53008e+08	http://metlin.scripps.edu/metabo_list.php?mass_min=745.55907&mass_max=745.56355	381.614	349.52	313.207	316.672	323.824	331.846	322.196	380.956	354.827	346.996	331.306	227.184	212.95	319.718
PC(33:2)		744.553	9.044		29.5021	3.85374e-09	2.39317e-06	0.979863	0.997565	1	0.481141	1.04911e-08	9.23892e-06	1.04707	0.877164	1	0.654542	6.51801e-05	0.0392112	63.3345	62.0591	30.4728	66.3157	41.4551	0.513056	Positive_normalized on PC	C41H78O8P1N1	744.554	M745T543	744.553	744.554	8.9399	9.0793	8.45138e+07	http://metlin.scripps.edu/metabo_list.php?mass_min=743.54337&mass_max=743.54784	62.2321	72.8664	58.5578	59.5975	68.3595	57.2097	64.5185	63.2281	67.1224	55.8268	38.7244	26.4417	22.5782	36.5551
PC(34:0)		762.599	9.0472		2.2856	0.0883651	54.8747	0.546474	0.059102	1	0.765549	0.296459	1	0.701782	0.129779	1	0.672281	0.102155	1	258.975	141.523	198.258	181.744	174.104	1.68134	Positive_normalized on PC	C42H84O8P1N1	762.601	M763T543	762.599	762.601	8.7582	9.1536	3.09634e+08	http://metlin.scripps.edu/metabo_list.php?mass_min=761.58936&mass_max=761.59393	117.563	196.221	288.835	316.592	320.523	290.225	282.863	162.846	112.632	149.091	253.037	170.622	114.155	212.295
PC(34:1)		760.585	8.9826		3.86018	0.014138	8.77969	1.06405	0.879956	1	0.929251	0.69054	1	1.1748	0.0505758	1	0.982435	0.997385	1	2802.69	2982.19	2604.4	3292.61	2753.46	0.594445	Positive_normalized on PC	C42H82O8P1N1	760.585	M761T539	760.584	760.585	8.922	9.0464	4.73623e+09	http://metlin.scripps.edu/metabo_list.php?mass_min=759.57455&mass_max=759.57912	2923.31	2906.58	2439.47	2974.92	2824.31	2836.01	2714.2	3175.21	2990.37	2780.99	3161.87	2221.32	1862.25	3081.45
PC(34:2)		758.569	8.9579		22.8092	4.91297e-08	3.05095e-05	1.0868	0.702937	1	0.593911	9.90026e-06	0.00191546	1.12004	0.226527	1	0.733294	0.00200619	1	787.065	855.381	467.446	881.542	577.15	0.345469	Positive_normalized on PC	C42H80O8P1N1	758.569	M759T537	758.569	758.569	8.9028	9.0294	1.14321e+09	http://metlin.scripps.edu/metabo_list.php?mass_min=757.55909&mass_max=757.56364	732.22	872.333	830.102	740.311	879.921	636.013	818.553	872.833	898.072	795.237	607.321	422.39	274.395	570.07
PC(34:3)		756.553	8.9558		36.2266	4.60634e-10	2.86054e-07	1.22445	0.164565	1	0.310668	2.48293e-08	4.09582e-06	1.10613	0.565816	1	0.496898	2.02281e-05	0.0140858	93.8964	114.971	29.1706	103.862	46.657	0.637097	Positive_normalized on PC	C42H78O8P1N1	756.554	M757T537	756.552	756.554	8.9028	9.0488	1.21596e+08	http://metlin.scripps.edu/metabo_list.php?mass_min=755.54323&mass_max=755.54777	83.5608	109.672	110.868	75.2554	99.9899	79.3921	98.5367	103.904	131.576	109.434	41.5399	30.394	11.9254	34.4378
PC(34:4)		754.538	8.9216		13.6074	5.07197e-06	0.00314969	1.10878	0.935693	1	0.409493	0.000866794	0.540779	1.34373	0.0674522	1	0.644928	0.06994	1	19.2741	21.3708	7.8926	25.8991	12.4304	0.718233	Positive_normalized on PC	C42H76O8P1N1	754.538	M755T535	754.537	754.538	8.8485	8.9759	2.80619e+07	http://metlin.scripps.edu/metabo_list.php?mass_min=753.52753&mass_max=753.53205	23.5786	18.5274	17.2617	18.94	14.8864	22.7786	18.9459	19.2739	27.8068	17.0316	11.6187	3.66488	3.65604	11.0218
PC(35:0)		776.616	9.0245		2.40855	0.0761087	47.2635	1.09652	0.99988	1	2.84144	0.0309085	1	1.88655	0.484361	1	1.45985	0.908	1	4.26263	4.67405	12.112	8.04167	6.22281	0.608092	Positive_normalized on PC	C43H86O8P1N1	776.616	M777T541	776.615	776.616	8.9202	9.0655	1.22296e+07	http://metlin.scripps.edu/metabo_list.php?mass_min=775.60578&mass_max=775.61044	5.08977	4.61756	4.18557	3.34023	2.62699	5.57438	4.40392	5.64549	3.66218	4.71447	9.33532	7.05506	32.1496	9.25977
PC(35:1)		774.6	8.9401		1.57487	0.211865	131.568	1.24325	0.308012	1	1.15286	0.489437	1	1.24967	0.115674	1	1.0743	0.926537	1	157.239	195.488	181.275	196.498	168.921	0.841969	Positive_normalized on PC	C43H84O8P1N1	774.601	M775T536	774.6	774.6	8.9028	9.0294	2.95529e+08	http://metlin.scripps.edu/metabo_list.php?mass_min=773.58996&mass_max=773.59461	164.999	167.541	142.684	147.149	151.867	147.413	179.019	211.164	185.566	189.732	227.154	134.317	113.451	218.501
PC(35:2)		772.585	8.9044		7.65149	0.000360383	0.223798	0.99155	0.999986	1	0.654176	0.00578876	1	1.07204	0.882588	1	0.667013	0.0112431	1	118.398	117.398	77.4533	126.928	78.9733	0.481664	Positive_normalized on PC	C43H82O8P1N1	772.585	M773T534	772.584	772.585	8.8683	8.9768	1.69245e+08	http://metlin.scripps.edu/metabo_list.php?mass_min=771.5746&mass_max=771.57923	96.494	133.491	128.002	107.985	118.177	124.384	120.257	117.225	130.023	104.945	107.656	64.0627	40.2339	106.508
PC(35:3)		770.569	8.9402		16.5282	9.60597e-07	0.000596531	1.0777	0.914737	1	0.527373	5.58454e-05	0.0429371	1.10273	0.639562	1	0.588106	0.000659902	0.427505	26.0582	28.083	13.7424	28.7352	15.325	0.859186	Positive_normalized on PC	C43H80O8P1N1	770.569	M771T536	770.567	770.569	8.8849	9.1715	3.60363e+07	http://metlin.scripps.edu/metabo_list.php?mass_min=769.55866&mass_max=769.56329	20.7828	30.6713	28.4187	21.7872	30.5504	24.3366	25.8606	27.3245	29.8812	27.0434	17.9968	13.0722	7.69366	18.2314
PC(36:1)		788.615	8.8867		2.72504	0.0520427	32.3185	1.52929	0.0941307	1	1.12002	0.908592	1	1.36547	0.154487	1	0.938302	0.992263	1	865.866	1324.16	969.786	1182.32	812.444	1.29626	Positive_normalized on PC	C44H86O8P1N1	788.616	M789T533	788.615	788.616	8.8505	8.9768	1.65506e+09	http://metlin.scripps.edu/metabo_list.php?mass_min=787.60519&mass_max=787.60992	896.826	836.423	828.236	615.719	973.866	705.548	1204.45	1471.33	1148.43	1352.73	1195.02	525.423	680.239	1172.26
PC(36:2)		786.6	8.8688		2.9318	0.0407489	25.305	1.05137	0.987834	1	0.796837	0.197704	1	1.06189	0.942263	1	0.783965	0.183405	1	1019.34	1071.71	812.25	1082.43	799.129	0.714708	Positive_normalized on PC	C44H84O8P1N1	786.601	M787T532	786.6	786.6	8.8324	8.9587	1.56736e+09	http://metlin.scripps.edu/metabo_list.php?mass_min=785.59001&mass_max=785.59473	813.035	1082.55	1069.11	927.386	1080.29	1005.39	1157.65	1100.45	1105.07	1009.62	1157.07	597.952	413.435	1175.6
PC(36:3)		784.585	8.8659		3.33534	0.0255107	15.8421	1.07114	0.974569	1	0.761887	0.173385	1	1.06961	0.943075	1	0.731769	0.126747	1	331.061	354.614	252.231	354.107	242.26	0.589007	Positive_normalized on PC	C44H82O8P1N1	784.585	M785T532	784.584	784.585	8.8324	8.956	5.00078e+08	http://metlin.scripps.edu/metabo_list.php?mass_min=783.57446&mass_max=783.57917	219.842	353.775	404.669	283.636	405.389	259.884	390.232	369.607	358.603	335.632	349.998	209.592	142.331	351.955
PC(36:4)		782.569	8.8331		5.03398	0.0040805	2.53399	0.72617	0.535571	1	0.417935	0.00599433	1	1.02063	0.999833	1	0.572766	0.0660927	1	592.726	430.419	247.721	604.956	339.493	0.437101	Positive_normalized on PC	C44H80O8P1N1	782.569	M783T530	782.567	782.569	8.7964	9.0848	7.02937e+08	http://metlin.scripps.edu/metabo_list.php?mass_min=781.55894&mass_max=781.56363	1006.89	458.08	425.381	539.552	736.116	444.322	538.741	467.463	406.111	417.684	383.864	106.742	153.434	348.681
PC(36:5)		780.554	8.823		20.4102	1.41017e-07	8.75715e-05	0.548439	0.0246923	1	0.148883	1.90859e-07	0.00035793	0.930725	0.94458	1	0.251247	5.42799e-06	0.00639148	245.152	134.451	36.4988	228.169	61.5936	0.245977	Positive_normalized on PC	C44H78O8P1N1	780.554	M781T529	780.552	780.554	8.7947	8.9768	2.16335e+08	http://metlin.scripps.edu/metabo_list.php?mass_min=779.54345&mass_max=779.54814	309.047	207.236	205.04	251.166	330.538	184.082	228.952	125.984	148.788	128.579	58.8044	17.5883	22.6893	52.0838
PC(36:6)		778.538	8.8153		42.6334	8.1208e-11	5.04302e-08	0.555676	0.00110266	0.732738	0.165336	1.32065e-10	2.48392e-08	0.910943	0.673933	1	0.210112	3.33621e-10	1.61046e-06	28.229	15.6862	4.66727	25.715	5.93126	-0.0745832	Positive_normalized on PC	C44H76O8P1N1	778.538	M779T529	778.537	778.538	8.7798	8.9937	2.50817e+07	http://metlin.scripps.edu/metabo_list.php?mass_min=777.52806&mass_max=777.53273	27.0747	28.0056	28.1279	26.5778	33.5562	25.1174	29.1431	12.3175	20.5188	14.2222	7.51976	3.10931	0.908598	8.33296
PC(37:1)		802.632	8.8689		2.56352	0.0631327	39.2054	1.5876	0.183921	1	1.6443	0.0340644	1	1.50633	0.120748	1	1.21353	0.799138	1	11.7296	18.622	19.2871	17.6687	14.2343	0.625839	Positive_normalized on PC	C45H88O8P1N1	802.632	M803T532	802.631	802.632	8.8324	8.9934	2.71695e+07	http://metlin.scripps.edu/metabo_list.php?mass_min=801.62133&mass_max=801.62614	12.4022	12.6896	9.21345	11.2583	10.4177	10.4903	15.6358	21.6821	15.167	19.017	26.3801	10.4863	13.1513	27.0991
PC(37:2)		800.616	8.8507		1.23822	0.320237	198.867	1.36757	0.63003	1	1.54166	0.123569	1	1.2358	0.761716	1	1.29221	0.640985	1	24.8725	34.015	38.345	30.7375	32.1404	0.502431	Positive_normalized on PC	C45H86O8P1N1	800.616	M801T531	800.615	800.616	8.8144	8.92	5.39756e+07	http://metlin.scripps.edu/metabo_list.php?mass_min=799.60578&mass_max=799.61058	20.8445	28.7293	23.4157	22.8148	23.5126	24.2412	30.5498	35.768	34.0912	32.1858	60.0567	18.9075	15.6273	66.2262
PC(37:3)		798.6	8.8333		0.373267	0.825437	512.597	1.09047	0.967966	1	1.00808	0.999993	1	1.06443	0.976216	1	0.907032	0.927414	1	25.5703	27.8836	25.7769	27.2177	23.1931	0.453531	Positive_normalized on PC	C45H84O8P1N1	798.601	M799T530	798.6	798.601	8.8144	8.8842	4.25538e+07	http://metlin.scripps.edu/metabo_list.php?mass_min=797.59018&mass_max=797.59497	22.7683	23.939	24.4151	23.0447	28.7223	24.9786	31.1244	29.8812	27.4722	26.2973	38.1097	14.8826	12.9139	36.7213
PC(37:4)		796.585	8.8152		5.4793	0.00261586	1.62445	0.839103	0.853987	1	0.47112	0.00879143	1	1.08163	0.962226	1	0.579034	0.0551515	1	70.9379	59.5242	33.4203	76.7283	41.0754	0.39183	Positive_normalized on PC	C45H82O8P1N1	796.585	M797T529	796.582	796.585	8.7785	9.0793	8.98055e+07	http://metlin.scripps.edu/metabo_list.php?mass_min=795.57458&mass_max=795.57936	106.294	57.2301	57.1042	69.6515	76.3247	54.5042	75.4568	66.3157	54.8209	57.436	53.6248	16.9108	28.0323	42.0402
PC(37:5)		794.569	8.7971		18.5964	3.33341e-07	0.000207005	0.633096	0.0207356	1	0.414503	5.68456e-06	0.00314774	0.942406	0.935104	1	0.359656	1.96492e-05	0.005009	51.0667	32.3301	21.1673	48.1255	18.3664	0.12845	Positive_normalized on PC	C45H80O8P1N1	794.569	M795T528_1	794.567	794.571	8.7221	9.0648	5.47512e+07	http://metlin.scripps.edu/metabo_list.php?mass_min=793.55915&mass_max=793.56392	63.2091	49.2155	45.3363	53.5153	49.5807	45.5967	51.0129	32.4161	33.4536	31.1206	26.9754	9.15769	36.8131	21.9761
PC(37:6)		792.554	8.7802		0.758096	0.562302	349.19	1.74569	0.657412	1	0.746524	0.970095	1	0.774851	0.98039	1	1.26353	0.970223	1	24.8505	43.3814	18.5515	19.2555	31.3994	-0.300297	Positive_normalized on PC	C45H78O8P1N1	792.554	M793T527	792.552	792.554	8.7621	8.9579	3.98871e+07	http://metlin.scripps.edu/metabo_list.php?mass_min=791.54384&mass_max=791.54859	92.7032	12.5223	11.7516	14.1287	15.718	13.6138	13.5161	61.865	8.53113	59.748	5.19361	11.7728	12.3856	5.07667
PC(38:1)		816.647	8.851		2.18548	0.0998481	62.0057	1.17083	0.979168	1	1.8376	0.0352589	1	1.24516	0.843226	1	1.20534	0.918651	1	8.12569	9.51384	14.9318	10.1178	9.79423	0.602931	Positive_normalized on PC	C46H90O8P1N1	816.648	M817T531	816.647	816.648	8.8127	8.9407	1.81771e+07	http://metlin.scripps.edu/metabo_list.php?mass_min=815.63694&mass_max=815.64184	6.96191	8.41833	7.01045	7.54138	8.19087	8.82867	9.92824	10.6072	8.12584	9.80848	23.9401	8.56597	8.46281	25.472
PC(38:2)		814.631	8.8159		2.10226	0.110562	68.6588	1.29439	0.91721	1	1.94464	0.0396817	1	1.18541	0.95824	1	1.35134	0.746282	1	36.5495	47.3092	71.0757	43.326	49.3907	0.788476	Positive_normalized on PC	C46H88O8P1N1	814.632	M815T529	814.631	814.632	8.7947	8.8842	8.5093e+07	http://metlin.scripps.edu/metabo_list.php?mass_min=813.62115&mass_max=813.62604	24.5436	39.1308	35.9197	34.0084	37.6443	33.564	51.0355	50.7535	47.1101	44.0641	119.422	28.0262	27.4103	131.818
PC(38:3)		812.615	8.8153		1.30899	0.293782	182.438	1.35105	0.477757	1	1.02544	0.999814	1	1.06717	0.991877	1	0.771762	0.656059	1	167.524	226.332	171.785	178.777	129.289	1.23337	Positive_normalized on PC	C46H86O8P1N1	812.616	M813T529	812.613	812.616	8.7609	8.9401	2.8297e+08	http://metlin.scripps.edu/metabo_list.php?mass_min=811.60514&mass_max=811.61002	107.956	155.162	149.815	191.513	186.911	173.216	208.093	242.485	216.334	220.178	280.964	53.8656	63.7049	250.376
PC(38:4)		810.6	8.7778		5.7009	0.00210754	1.30879	0.925156	0.991141	1	0.5222	0.0287698	1	1.18367	0.661004	1	0.557588	0.0579926	1	1322.46	1223.48	690.588	1565.36	737.387	1.18701	Positive_normalized on PC	C46H84O8P1N1	810.601	M811T527	810.6	810.6	8.7444	8.798	1.76064e+09	http://metlin.scripps.edu/metabo_list.php?mass_min=809.58953&mass_max=809.5944	2041.48	1077.03	1073.22	1200.07	1322.99	971.889	1570.54	1391.69	1064.23	1214.52	1059.63	296.516	509.695	782.281
PC(38:5)		808.585	8.777		14.6891	2.66908e-06	0.0016575	0.700145	0.0882996	1	0.457347	6.0292e-05	0.0188833	0.98355	0.999484	1	0.435969	2.93582e-05	0.0273867	1164.17	815.089	532.431	1145.02	507.543	0.658095	Positive_normalized on PC	C46H82O8P1N1	808.585	M809T527	808.584	808.585	8.7444	8.798	1.34059e+09	http://metlin.scripps.edu/metabo_list.php?mass_min=807.57433&mass_max=807.57918	1470.86	1137.71	1087.76	1083.12	1169.92	1029.11	1170.73	858.333	800.353	786.582	857.5	291.502	290.948	701.429
PC(38:6)		806.569	8.7624		22.2229	6.30614e-08	3.91611e-05	0.660783	0.0146451	1	0.40267	4.55759e-07	0.000251135	0.905969	0.642821	1	0.379649	3.72328e-07	0.00273764	432.056	285.495	173.976	391.429	164.03	0.362104	Positive_normalized on PC	C46H80O8P1N1	806.569	M807T526	806.569	806.569	8.741	8.7966	4.64772e+08	http://metlin.scripps.edu/metabo_list.php?mass_min=805.55892&mass_max=805.56376	413.047	457.017	417.841	422.671	454.158	404.263	455.395	269.34	316.844	270.302	260.535	97.8571	81.9143	291.022
PC(38:7)		804.553	8.7604		36.5404	4.20631e-10	2.61212e-07	0.730889	0.0542109	1	0.239547	1.36363e-09	5.55001e-07	0.919157	0.728358	1	0.292047	1.12406e-08	2.61678e-05	53.6812	39.235	12.8592	49.3414	15.6774	0.512083	Positive_normalized on PC	C46H78O8P1N1	804.554	M805T526	804.553	804.554	8.741	8.7801	5.39429e+07	http://metlin.scripps.edu/metabo_list.php?mass_min=803.54315&mass_max=803.54798	50.0387	60.579	57.939	39.1244	56.0124	47.8834	64.1913	32.9835	47.5782	37.1432	19.359	7.36712	5.9624	21.7888
PC(39:2)		828.647	8.7982		3.30193	0.0265067	16.4607	1.35361	0.932921	1	2.40948	0.014018	1	1.14498	0.993036	1	1.85775	0.227297	1	1.84651	2.49944	4.44913	2.11421	3.43035	0.70281	Positive_normalized on PC	C47H90O8P1N1	828.648	M829T528_2	828.646	828.647	8.7805	8.8486	4.95182e+06	http://metlin.scripps.edu/metabo_list.php?mass_min=827.63682&mass_max=827.64179	1.0393	1.95337	1.73833	1.52408	1.60196	1.83895	3.22956	2.5984	2.40695	2.49298	7.04268	2.33914	1.88703	8.55355
PC(39:3)		826.632	8.7787		1.56612	0.214167	132.998	1.35882	0.646288	1	1.57264	0.0951047	1	1.16745	0.909496	1	1.12207	0.972583	1	6.21375	8.44336	9.77202	7.25426	6.97228	0.51089	Positive_normalized on PC	C47H88O8P1N1	826.632	M827T527	826.631	826.632	8.7617	8.8484	1.29935e+07	http://metlin.scripps.edu/metabo_list.php?mass_min=825.62133&mass_max=825.62629	5.29201	6.56599	5.18627	6.25623	5.56653	6.812	7.81725	9.31515	7.8193	8.19561	16.7712	3.6016	4.82534	14.8964
PC(39:4)		824.616	8.7608		1.28415	0.302827	188.056	1.47048	0.325103	1	1.28955	0.525004	1	1.37753	0.29583	1	1.06056	0.996992	1	20.2557	29.7855	26.1207	27.9027	21.4823	0.572696	Positive_normalized on PC	C47H86O8P1N1	824.616	M825T526	824.615	824.616	8.7219	8.7946	4.15519e+07	http://metlin.scripps.edu/metabo_list.php?mass_min=823.60564&mass_max=823.61058	27.4437	23.274	19.7576	16.8044	15.8482	16.6444	22.0173	35.2127	26.0006	28.1433	43.3063	11.039	18.1226	31.9956
PC(39:5)		822.6	8.7451		2.35868	0.0808522	50.2092	1.03279	0.999281	1	0.822405	0.548396	1	1.0682	0.969919	1	0.680357	0.121618	1	42.5	43.8934	34.9523	45.3986	28.9152	0.537551	Positive_normalized on PC	C47H84O8P1N1	822.601	M823T525	822.599	822.6	8.7219	8.7788	6.41666e+07	http://metlin.scripps.edu/metabo_list.php?mass_min=821.59003&mass_max=821.59496	52.3455	50.2904	40.4921	39.5887	35.9542	35.6544	43.1751	47.4799	42.397	41.8034	59.19	16.3977	19.7084	49.7055
PC(39:6)		820.585	8.7448		14.0722	3.83398e-06	0.0023809	0.788853	0.287416	1	0.483569	3.8172e-05	0.026215	0.92035	0.830786	1	0.416953	9.67667e-06	0.0132878	35.58	28.0674	17.2054	32.7461	14.8352	0.490048	Positive_normalized on PC	C47H82O8P1N1	820.585	M821T525	820.584	820.585	8.7219	8.7788	4.14126e+07	http://metlin.scripps.edu/metabo_list.php?mass_min=819.57442&mass_max=819.57934	37.4859	40.1577	34.5187	35.2755	31.2819	33.2476	37.0928	26.8334	30.663	26.7059	26.1848	7.90621	9.12012	29.4592
PC(39:7)		818.569	8.7434		11.0883	2.59934e-05	0.0161419	0.760716	0.319921	1	0.471125	0.000278037	0.166161	0.94601	0.971227	1	0.401086	9.33397e-05	0.0551515	10.7648	8.18897	5.07158	10.1836	4.31762	0.833237	Positive_normalized on PC	C47H80O8P1N1	818.569	M819T525	818.567	818.569	8.7219	8.8509	1.25054e+07	http://metlin.scripps.edu/metabo_list.php?mass_min=817.55849&mass_max=817.56341	10.6665	12.5563	8.54277	9.76735	10.7666	10.39	12.6642	6.7782	9.7025	8.08623	7.03205	2.09819	7.43239	8.24343
PC(40:0)		846.694	8.8156		6.97644	0.000646982	0.401776	0.880874	0.999967	1	6.03072	0.000429728	0.247083	2.10736	0.730607	1	4.20493	0.0356183	1	0.500427	0.440813	3.01794	1.05458	2.10426	0.912459	Positive_normalized on PC	C48H96O8P1N1	846.695	M847T529	846.693	846.694	8.7957	8.8842	2.6669e+06	http://metlin.scripps.edu/metabo_list.php?mass_min=845.68352&mass_max=845.6886	0.324878	0.547376	0.597477	0.383065	0.215198	0.715194	0.7198	0.521323	0.408007	0.39311	4.82332	1.3676	1.59958	4.91301
PC(40:1)		844.679	8.8063		6.48165	0.00101051	0.627525	1.12638	0.999758	1	4.20032	0.000496817	0.316873	1.40024	0.95064	1	2.3307	0.251954	1	2.70576	3.0477	11.365	3.78871	6.30632	0.441008	Positive_normalized on PC	C48H94O8P1N1	844.679	M845T528	844.678	844.679	8.778	8.8842	9.98861e+06	http://metlin.scripps.edu/metabo_list.php?mass_min=843.66828&mass_max=843.67335	1.70705	2.57529	2.29394	2.48593	2.07874	3.33098	4.46834	3.52748	2.63764	2.97797	20.4543	4.69625	6.07455	18.549
PC(40:10)		826.537	8.7096		11.1532	2.48544e-05	0.0154346	0.546737	0.173578	1	0.090826	9.25476e-05	0.0914575	0.902917	0.952882	1	0.138854	0.000295694	0.158498	1.41332	0.772713	0.128366	1.27611	0.196245	1.97442	Positive_normalized on PC	C48H76O8P1N1	826.538	M827T523	826.535	826.538	8.6546	8.7976	1.15929e+06	http://metlin.scripps.edu/metabo_list.php?mass_min=825.52622&mass_max=825.53118	1.87679	1.58759	1.65489	0.468477	1.24664	0.652578	2.40626	0.501964	1.01166	0.804521	0.215184	0.105185	0.0694464	0.346738
PC(40:2)		842.663	8.7794		4.85067	0.00492055	3.05566	1.47037	0.918948	1	3.25375	0.00161882	1	1.35836	0.923102	1	1.68014	0.612858	1	4.14285	6.09153	13.4798	5.62748	6.96056	0.525057	Positive_normalized on PC	C48H92O8P1N1	842.663	M843T527	842.662	842.663	8.7598	8.8484	1.28913e+07	http://metlin.scripps.edu/metabo_list.php?mass_min=841.65256&mass_max=841.65762	3.28704	3.78296	3.79066	4.2581	3.25765	3.88648	6.73706	7.07529	4.86966	6.32965	23.4011	4.3207	7.23752	24.0948
PC(40:3)		840.647	8.7767		7.11228	0.000573907	0.356396	1.51498	0.839779	1	3.27376	0.000305819	0.192686	1.08503	0.999378	1	1.8907	0.268224	1	8.48818	12.8594	27.7883	9.2099	16.0486	0.585718	Positive_normalized on PC	C48H90O8P1N1	840.648	M841T527	840.646	840.648	8.6545	8.7966	2.61894e+07	http://metlin.scripps.edu/metabo_list.php?mass_min=839.63687&mass_max=839.64191	8.03285	8.78165	9.3755	8.07487	5.6291	9.2538	10.2695	14.5559	10.5261	13.4963	48.3338	10.7376	14.3245	41.0411
PC(40:4)		838.631	8.7442		3.46495	0.0220065	13.666	1.93517	0.0776497	1	1.81607	0.0403071	1	1.06183	0.998812	1	1.08939	0.995763	1	83.5409	161.666	151.716	88.7061	91.0088	0.956699	Positive_normalized on PC	C48H88O8P1N1	838.632	M839T525_2	838.629	838.632	8.704	8.8305	1.90394e+08	http://metlin.scripps.edu/metabo_list.php?mass_min=837.62092&mass_max=837.62595	95.4263	115.295	96.1119	64.8407	61.465	79.3415	72.3062	190.383	132.943	161.671	283.038	41.9787	91.1011	190.969
PC(40:5)		836.615	8.7416		2.56027	0.0633802	39.3591	1.28828	0.419173	1	1.03186	0.998724	1	0.888729	0.884586	1	0.694732	0.198632	1	338.782	436.447	349.576	301.085	235.363	1.05455	Positive_normalized on PC	C48H86O8P1N1	836.616	M837T524	836.615	836.616	8.6707	8.7788	5.33358e+08	http://metlin.scripps.edu/metabo_list.php?mass_min=835.60519&mass_max=835.61021	355.547	408.887	347.841	341.497	311.242	258.924	347.536	479.901	395.295	434.146	607.009	159.134	229.662	461.686
PC(40:6)		834.6	8.726		5.08549	0.00387312	2.40521	1.1191	0.873985	1	0.760006	0.187781	1	0.993768	0.999995	1	0.562729	0.0074244	1	402.601	450.551	305.979	400.091	226.555	0.901257	Positive_normalized on PC	C48H84O8P1N1	834.601	M835T524	834.6	834.6	8.6858	8.7609	5.78859e+08	http://metlin.scripps.edu/metabo_list.php?mass_min=833.58968&mass_max=833.59469	394.661	457.506	417.034	391.248	348.111	343.557	466.087	463.107	442.11	446.436	513.159	150.903	183.916	502.021
PC(40:7)		832.584	8.7096		4.99996	0.00422396	2.62308	0.993254	0.999998	1	0.65767	0.0515607	1	1.01469	0.999893	1	0.548273	0.0105943	1	232.815	231.244	153.115	236.234	127.646	0.975427	Positive_normalized on PC	C48H82O8P1N1	832.585	M833T523	832.582	832.585	8.6858	8.9578	3.19948e+08	http://metlin.scripps.edu/metabo_list.php?mass_min=831.57397&mass_max=831.57896	233.845	258.877	260.135	185.758	189.16	205.827	296.102	237.726	219.503	236.505	250.451	82.2948	83.9546	272.48
PC(40:8)		830.568	8.7246		3.79566	0.0151843	9.42948	0.823175	0.841537	1	0.523395	0.0306652	1	1.00775	0.999997	1	0.547506	0.0532657	1	51.4177	42.3258	26.9117	51.8159	28.1515	1.59175	Positive_normalized on PC	C48H80O8P1N1	830.569	M831T523	830.567	830.569	8.6858	8.8855	6.48093e+07	http://metlin.scripps.edu/metabo_list.php?mass_min=829.55782&mass_max=829.5628	81.0264	51.3289	71.8249	17.277	33.6572	39.9229	64.8863	49.767	36.462	40.7482	40.7826	15.1583	16.1228	40.1161
PC(40:9)		828.553	8.6736		12.7681	8.54437e-06	0.00530605	0.632035	0.248144	1	0.110961	2.08157e-05	0.0137269	0.913143	0.954212	1	0.193958	0.000178585	0.0922921	10.7613	6.80153	1.19409	9.82663	2.08724	1.19726	Positive_normalized on PC	C48H78O8P1N1	828.554	M829T520	828.552	828.554	8.6338	8.7264	9.34474e+06	http://metlin.scripps.edu/metabo_list.php?mass_min=827.54251&mass_max=827.54748	17.0672	11.2276	17.4022	4.54157	7.15561	6.2768	11.6583	6.05185	6.60468	7.74806	2.38451	0.690706	0.821223	1.86834
PC(41:0)		860.71	8.7981		7.05756	0.000602215	0.373975	7.12088	0.998048	1	93.0203	0.00041283	0.277465	16.9898	0.855993	1	63.081	0.0241865	1	0.0102448	0.0729518	0.952972	0.174057	0.646251	0.0960115	Positive_normalized on PC	C49H98O8P1N1	860.71	M861T528	860.71	860.71	8.778	8.8326	733008	http://metlin.scripps.edu/metabo_list.php?mass_min=859.69982&mass_max=859.70498	0	0.0257961	0.00745561	0	0	0.0384617	0	0.0859313	0.0249794	0.107945	1.70977	0.421077	0.448141	1.6684
PC(41:1)		858.694	8.796		7.14385	0.000558228	0.34666	2.97129	0.980404	1	18.0019	0.000219361	0.145104	4.72572	0.694039	1	11.0291	0.0399188	1	0.177272	0.526726	3.19123	0.837739	1.95514	0.736669	Positive_normalized on PC	C49H96O8P1N1	858.695	M859T528	858.693	858.694	8.7599	8.8486	2.57347e+06	http://metlin.scripps.edu/metabo_list.php?mass_min=857.68363&mass_max=857.68878	0.157524	0.236697	0.0720661	0.0685182	0.165275	0.159871	0.380953	0.488207	0.632087	0.459884	5.38608	1.06551	1.72428	6.01975
PC(41:2)		856.678	8.7768		5.7154	0.00207821	1.29057	1.92866	0.927489	1	6.02208	0.000642969	0.438133	1.89952	0.855907	1	3.11761	0.256026	1	0.459184	0.885609	2.76524	0.87223	1.43156	0.738328	Positive_normalized on PC	C49H94O8P1N1	856.679	M857T527	856.678	856.679	8.741	8.7974	2.37538e+06	http://metlin.scripps.edu/metabo_list.php?mass_min=855.66798&mass_max=855.67312	0.325875	0.43473	0.370961	0.523931	0.235025	0.41569	0.908076	0.975256	0.792604	0.888968	4.83283	0.784105	1.61981	5.59741
PC(41:3)		854.663	8.7447		5.24203	0.00330929	2.05507	1.35355	0.975455	1	3.27638	0.00285163	1	0.881611	0.998971	1	1.85987	0.471185	1	0.942278	1.27542	3.08726	0.830723	1.75251	0.248573	Positive_normalized on PC	C49H92O8P1N1	854.663	M855T525	854.662	854.664	8.6903	8.8484	2.75977e+06	http://metlin.scripps.edu/metabo_list.php?mass_min=853.65276&mass_max=853.65789	1.77978	0.744349	0.611073	0.970834	1.22901	0.614663	0.646238	1.30714	1.11951	1.3996	5.31971	0.468197	1.57928	5.62006
PC(41:4)		852.647	8.7273		5.98285	0.00160876	0.999037	2.14497	0.186352	1	3.03485	0.000486749	0.348505	1.34703	0.866399	1	1.69825	0.409037	1	2.62529	5.63117	7.96738	3.53636	4.4584	0.260814	Positive_normalized on PC	C49H90O8P1N1	852.648	M853T524	852.647	852.648	8.6858	8.7788	8.25474e+06	http://metlin.scripps.edu/metabo_list.php?mass_min=851.63711&mass_max=851.64222	2.87783	3.28436	3.54447	1.79088	1.66611	2.10893	3.1045	6.61351	4.24918	6.03083	14.0785	2.78687	4.44323	10.237
PC(41:5)		850.632	8.724		2.81455	0.0467956	29.06	1.56892	0.33934	1	1.78478	0.0286828	1	1.12792	0.97384	1	1.09877	0.991207	1	7.46563	11.713	13.3245	8.42063	8.20305	0.437696	Positive_normalized on PC	C49H88O8P1N1	850.632	M851T523	850.632	850.632	8.6858	8.7609	1.65353e+07	http://metlin.scripps.edu/metabo_list.php?mass_min=849.6213&mass_max=849.62641	7.88371	9.57663	8.18211	6.56335	5.60023	5.81657	8.63684	13.4001	10.2201	11.5188	24.4048	4.94578	7.61847	19.6988
PC(41:6)		848.616	8.7089		1.35351	0.278209	172.768	1.42124	0.468552	1	1.36132	0.379146	1	1.10765	0.975641	1	0.909551	0.988826	1	9.05244	12.8657	12.3232	10.0269	8.23365	0.462228	Positive_normalized on PC	C49H86O8P1N1	848.616	M849T523_2	848.615	848.616	8.6858	8.7609	1.7604e+07	http://metlin.scripps.edu/metabo_list.php?mass_min=847.60564&mass_max=847.61074	10.1846	12.5333	9.63788	8.42893	6.43354	7.76103	8.38782	13.3588	12.7476	12.4907	21.5025	4.19274	6.69166	22.8253
PC(41:7)		846.6	8.6921		0.887827	0.485602	301.559	1.2559	0.755222	1	1.08104	0.986121	1	1.13361	0.921428	1	0.814773	0.815576	1	6.65492	8.35788	7.19424	7.5441	5.42225	0.817611	Positive_normalized on PC	C49H84O8P1N1	846.601	M847T522	846.6	846.6	8.6679	8.7256	1.1782e+07	http://metlin.scripps.edu/metabo_list.php?mass_min=845.5897&mass_max=845.59478	6.80872	8.70771	7.19336	4.96303	4.94554	6.17498	7.79111	8.53941	8.44315	8.09109	12.5799	2.78951	4.01387	13.4042
PC(42:0)		874.726	8.7796		5.85029	0.00182535	1.13354	2.30867	0.945951	1	8.05346	0.00170022	1	3.61894	0.406435	1	7.64256	0.00458566	1	0.976183	2.25368	7.86165	3.53274	7.46054	0.208868	Positive_normalized on PC	C50H100O8P1N1	874.726	M875T527	874.725	874.726	8.7618	8.8152	8.19785e+06	http://metlin.scripps.edu/metabo_list.php?mass_min=873.71533&mass_max=873.72058	1.47371	0.316637	0.200253	1.10721	1.60031	1.383	0.752161	2.45798	2.07843	2.22463	14.1537	3.07746	4.0786	12.1485
PC(42:1)		872.71	8.7628		5.51573	0.00252397	1.56738	2.28538	0.869487	1	6.2771	0.00159081	1.01831	2.45507	0.651673	1	5.39055	0.0120606	1	3.65287	8.34818	22.9294	8.96805	19.691	0.404072	Positive_normalized on PC	C50H98O8P1N1	872.71	M873T526	872.709	872.71	8.742	8.7969	2.33646e+07	http://metlin.scripps.edu/metabo_list.php?mass_min=871.69951&mass_max=871.70475	3.04329	3.16126	3.61968	2.98655	2.45981	2.59887	7.70062	9.22538	7.32222	8.49694	40.9536	9.14596	13.9605	38.6484
PC(42:10)		854.569	8.6528		3.13514	0.0321335	19.9549	0.668383	0.451238	1	0.554692	0.0711594	1	0.881573	0.919024	1	0.429277	0.0199736	1	47.6191	31.8278	26.414	41.9798	20.4418	0.798135	Positive_normalized on PC	C50H80O8P1N1	854.569	M855T519	854.567	854.569	8.6158	8.814	5.43195e+07	http://metlin.scripps.edu/metabo_list.php?mass_min=853.55838&mass_max=853.56351	90.1538	45.0178	60.3714	22.2444	30.8669	30.2129	54.4667	35.2899	25.6156	34.5779	49.8659	13.9669	14.373	40.0614
PC(42:11)		852.553	8.6527		17.2653	6.52028e-07	0.00040491	0.442188	0.00903007	1	0.118551	1.75143e-06	0.00031728	0.875836	0.750695	1	0.267023	3.97918e-05	0.0183508	8.30391	3.67189	0.984439	7.27286	2.21733	0.729571	Positive_normalized on PC	C50H78O8P1N1	852.554	M853T519_1	852.553	852.553	8.6309	8.7072	6.97735e+06	http://metlin.scripps.edu/metabo_list.php?mass_min=851.5428&mass_max=851.54792	11.0364	8.97311	11.5709	4.77845	6.70107	5.6736	9.3938	3.3169	3.57307	4.1257	1.89727	0.374548	0.301108	2.43943
PC(42:2)		870.694	8.745		5.63073	0.00225597	1.40095	2.1247	0.901862	1	6.45314	0.000751064	0.438246	1.94944	0.872597	1	3.68169	0.158227	1	4.0137	8.52791	25.901	7.82446	14.7772	0.55424	Positive_normalized on PC	C50H96O8P1N1	870.695	M871T525_2	870.694	870.694	8.7219	8.7788	2.26455e+07	http://metlin.scripps.edu/metabo_list.php?mass_min=869.68374&mass_max=869.68896	2.7251	3.44896	3.97436	3.96246	2.76748	2.79366	8.4239	10.2327	6.7631	8.58795	44.9515	7.65917	16.0331	53.1246
PC(42:3)		868.679	8.7439		8.81586	0.000139127	0.0863977	2.38178	0.823435	1	7.62108	5.00243e-05	0.0363147	1.61212	0.970235	1	4.37541	0.055524	1	2.99896	7.14287	22.8554	4.8347	13.1217	0.382777	Positive_normalized on PC	C50H94O8P1N1	868.679	M869T525	868.678	868.679	8.704	8.7788	1.86584e+07	http://metlin.scripps.edu/metabo_list.php?mass_min=867.66824&mass_max=867.67345	2.94054	2.79422	3.33675	2.34321	1.72089	2.26591	5.59121	8.93717	5.17365	7.31778	39.4026	7.99765	12.1901	37.6771
PC(42:4)		866.663	8.7262		9.37943	8.9888e-05	0.0558204	2.5229	0.223095	1	4.43314	4.18375e-05	0.0228806	1.19188	0.99471	1	2.3544	0.157348	1	14.5969	36.8266	64.7102	17.3978	34.367	0.522055	Positive_normalized on PC	C50H92O8P1N1	866.663	M867T524	866.662	866.663	8.6858	8.7609	5.75389e+07	http://metlin.scripps.edu/metabo_list.php?mass_min=865.65248&mass_max=865.65768	15.7343	16.5193	20.4763	10.3316	9.60919	9.15727	20.3505	44.7895	25.9738	39.7164	106.859	26.1021	29.9681	75.9457
PC(42:5)		864.647	8.7089		6.07489	0.00147468	0.915778	1.97552	0.292396	1	2.90276	0.000854432	0.533296	1.06094	0.999757	1	1.75395	0.327495	1	37.1496	73.3896	107.836	39.4134	65.1584	0.56946	Positive_normalized on PC	C50H90O8P1N1	864.648	M865T523_2	864.646	864.647	8.6679	8.7609	1.09216e+08	http://metlin.scripps.edu/metabo_list.php?mass_min=863.6368&mass_max=863.64199	35.9554	42.7532	50.8136	30.9506	26.5388	23.9576	49.0776	86.8972	55.9028	77.3687	196.729	37.3227	46.6714	134.669
PC(42:6)		862.632	8.7064		4.003	0.0120854	7.50504	1.64277	0.486085	1	2.2322	0.00892704	1	0.965255	0.999944	1	1.49562	0.524729	1	47.602	78.1993	106.257	45.948	71.1944	0.605494	Positive_normalized on PC	C50H88O8P1N1	862.632	M863T522	862.631	862.632	8.6679	8.7609	1.18773e+08	http://metlin.scripps.edu/metabo_list.php?mass_min=861.62112&mass_max=861.6263	40.9531	57.4131	64.1285	38.0203	35.8442	35.3584	61.4963	85.4668	68.5231	80.608	191.965	41.2127	49.6804	173.523
PC(42:7)		860.616	8.6879		2.92459	0.041096	25.5206	1.50472	0.613375	1	2.05347	0.0149832	1	1.15751	0.972996	1	1.40149	0.624077	1	37.5524	56.5057	77.1128	43.4672	52.6293	0.711413	Positive_normalized on PC	C50H86O8P1N1	860.616	M861T521	860.615	860.616	8.65	8.7251	9.17704e+07	http://metlin.scripps.edu/metabo_list.php?mass_min=859.60539&mass_max=859.61055	40.452	47.5416	48.6703	25.1641	26.0354	31.0973	43.906	62.9884	48.7754	57.7531	142.894	30.0529	50.5297	116.607
PC(42:8)		858.6	8.673		2.04827	0.118138	73.3637	1.48758	0.773765	1	2.0925	0.0427192	1	1.21164	0.961669	1	1.44951	0.686152	1	34.8918	51.9044	73.0111	42.2765	50.5762	0.864418	Positive_normalized on PC	C50H84O8P1N1	858.601	M859T520	858.599	858.6	8.6391	8.7072	8.64893e+07	http://metlin.scripps.edu/metabo_list.php?mass_min=857.58962&mass_max=857.59477	43.6656	44.4261	54.7188	18.4176	19.9528	24.5191	38.543	64.3303	35.426	55.9567	140.282	31.9833	64.6785	69.3119
PC(42:9)		856.584	8.6711		0.378104	0.82207	510.506	1.05027	0.999682	1	1.05643	0.998635	1	1.0768	0.995511	1	0.776291	0.843339	1	64.4056	67.6434	68.04	69.3516	49.9975	0.98312	Positive_normalized on PC	C50H82O8P1N1	856.585	M857T520	856.582	856.585	8.6338	8.901	1.06584e+08	http://metlin.scripps.edu/metabo_list.php?mass_min=855.57387&mass_max=855.57901	98.6428	72.7224	94.1973	30.0882	42.0934	38.1906	74.9045	80.05	46.6615	76.2186	131.941	37.9514	46.4341	75.7708
PC(43:1)		886.726	8.7439		4.97147	0.00434829	2.70029	10.4907	0.615546	1	25.3806	0.00250289	1	12.29	0.252042	1	24.2231	0.00561168	1	0.148731	1.56028	3.77488	1.8279	3.60272	0.172209	Positive_normalized on PC	C51H100O8P1N1	886.726	M887T525	886.726	886.726	8.7228	8.7788	4.10036e+06	http://metlin.scripps.edu/metabo_list.php?mass_min=885.71532&mass_max=885.72064	0.0472891	0.0784439	0.209758	0.0143174	0.0267263	0.0733669	0.591214	1.94536	1.22765	1.50784	6.87251	1.19573	2.2954	7.22019
PC(43:2)		884.71	8.7264		6.09815	0.00144273	0.895934	5.33874	0.695416	1	15.6254	0.000494574	0.248804	4.51664	0.662425	1	9.97568	0.0423636	1	0.287776	1.53636	4.49661	1.29978	2.87076	0.579442	Positive_normalized on PC	C51H98O8P1N1	884.71	M885T524	884.709	884.71	8.704	8.7611	3.95726e+06	http://metlin.scripps.edu/metabo_list.php?mass_min=883.69931&mass_max=883.70462	0.135599	0.255898	0.491303	0.128729	0.0747885	0.0429432	0.885172	1.78798	1.3844	1.4367	7.4408	1.31819	2.89723	9.48251
PC(43:3)		882.695	8.7241		5.99866	0.00158482	0.984173	4.00563	0.745906	1	11.553	0.000599508	0.364544	2.42673	0.939485	1	6.72278	0.0974908	1	0.217406	0.870847	2.5117	0.527584	1.46157	0.127535	Positive_normalized on PC	C51H96O8P1N1	882.695	M883T523	882.694	882.695	8.7032	8.7609	2.08988e+06	http://metlin.scripps.edu/metabo_list.php?mass_min=881.68407&mass_max=881.68936	0.41377	0.19268	0.240403	0.0636632	0.0588432	0.111286	0.441194	0.976166	0.602839	1.03354	4.58676	0.6217	1.3952	5.25287
PC(43:4)		880.679	8.7089		7.07754	0.000591711	0.367453	2.21656	0.483001	1	4.21465	0.000311703	0.196286	1.0952	0.999753	1	2.25731	0.270502	1	0.874822	1.9391	3.68707	0.958106	1.97475	0.51382	Positive_normalized on PC	C51H94O8P1N1	880.679	M881T523	880.678	880.679	8.6858	8.7609	3.23785e+06	http://metlin.scripps.edu/metabo_list.php?mass_min=879.66809&mass_max=879.67338	1.64704	0.46091	0.61712	0.911359	1.13384	0.214497	1.13899	2.37991	1.02805	2.40933	6.35893	1.1802	1.82068	5.43694
PC(43:5)		878.663	8.6913		3.67714	0.0173269	10.76	1.04255	0.999975	1	2.10592	0.0519367	1	0.533122	0.662789	1	1.08406	0.999131	1	2.39971	2.50181	5.0536	1.27934	2.60142	0.32145	Positive_normalized on PC	C51H92O8P1N1	878.663	M879T521	878.663	878.664	8.6679	8.7264	4.58786e+06	http://metlin.scripps.edu/metabo_list.php?mass_min=877.65262&mass_max=877.65789	6.88828	1.27397	1.18332	0.74494	4.42058	0.432153	1.85471	2.99785	1.33622	3.17135	9.25179	1.42437	2.7621	7.28555
PC(43:6)		876.648	8.6879		5.36403	0.00293094	1.82011	1.60311	0.861869	1	3.46259	0.00136618	0.915979	1.13796	0.99818	1	1.89578	0.441441	1	1.26886	2.03413	4.39356	1.44392	2.40549	-0.134168	Positive_normalized on PC	C51H90O8P1N1	876.648	M877T521	876.647	876.649	8.6321	8.7251	4.099e+06	http://metlin.scripps.edu/metabo_list.php?mass_min=875.63737&mass_max=875.64263	1.48864	1.46136	1.64488	0.921525	0.983884	0.80971	1.57205	2.43738	1.71023	1.95477	8.33073	1.38722	2.45005	7.76342
PC(43:7)		874.632	8.6567		2.98087	0.0384681	23.8887	1.2819	0.966634	1	2.41324	0.0120524	1	1.35582	0.841239	1	1.41652	0.781464	1	1.69866	2.17751	4.09927	2.30308	2.40618	0.219885	Positive_normalized on PC	C51H88O8P1N1	874.632	M875T519	874.631	874.632	8.6321	8.7451	4.50281e+06	http://metlin.scripps.edu/metabo_list.php?mass_min=873.62141&mass_max=873.62666	1.87643	2.059	2.42464	1.13468	1.14536	1.32195	1.92857	2.27821	1.87128	2.38304	7.63349	1.32732	2.52546	7.13532
PC(43:8)		872.616	8.6567		1.48172	0.237659	147.586	1.19912	0.985334	1	1.78641	0.164971	1	1.09794	0.997356	1	0.958811	0.999925	1	0.889604	1.06674	1.58919	0.976736	0.852962	0.988125	Positive_normalized on PC	C51H86O8P1N1	872.616	M873T519	872.614	872.616	8.6164	8.7434	1.8569e+06	http://metlin.scripps.edu/metabo_list.php?mass_min=871.6051&mass_max=871.61034	1.0479	1.14519	0.891719	0.729464	0.75123	0.875341	0.786388	1.03537	0.916826	1.24803	3.75933	0.767014	1.27276	1.4289
PC(43:9)		870.6	8.6566		1.53234	0.223283	138.659	1.01872	0.999998	1	1.65706	0.223715	1	0.952569	0.999778	1	0.890971	0.995114	1	0.679844	0.692571	1.12654	0.647598	0.605721	1.1052	Positive_normalized on PC	C51H84O8P1N1	870.601	M871T519	870.599	870.6	8.6517	8.6901	1.31929e+06	http://metlin.scripps.edu/metabo_list.php?mass_min=869.58936&mass_max=869.59458	0.754279	0.891435	0.728081	0.42699	0.397903	0.660915	0.899303	0.573968	0.62316	0.880584	2.38575	0.491894	0.626143	1.84234
PC(44:0)		902.758	8.7426		5.09475	0.00383704	2.3828	4.68412	0.94051	1	19.8698	0.00211676	1	7.83481	0.447661	1	16.8698	0.0139676	1	0.174306	0.816468	3.46342	1.36565	2.94051	-0.406721	Positive_normalized on PC	C52H104O8P1N1	902.757	M903T525	902.757	902.758	8.7228	8.7788	3.33069e+06	http://metlin.scripps.edu/metabo_list.php?mass_min=901.74709&mass_max=901.75251	0.0676942	0.205413	0.206961	0.181539	0.140338	0.203146	0.215048	0.81628	0.669003	0.964121	6.46575	1.06886	2.46002	4.93908
PC(44:1)		900.741	8.7097		4.40587	0.00783084	4.86295	8.90881	0.45199	1	16.6814	0.00464687	1	11.2943	0.0836429	1	16.9415	0.00590357	1	1.13095	10.0754	18.8658	12.7733	19.16	0.191804	Positive_normalized on PC	C52H102O8P1N1	900.742	M901T523_2	900.741	900.742	8.6888	8.7609	2.29654e+07	http://metlin.scripps.edu/metabo_list.php?mass_min=899.73091&mass_max=899.73631	0.596155	0.80615	1.26097	0.251035	0.473246	0.737481	3.79161	11.482	8.539	10.2052	34.5341	6.83789	13.1163	33.4134
PC(44:10)		882.6	8.635		3.02042	0.0367278	22.808	1.09894	0.997898	1	1.86727	0.0421409	1	0.920914	0.997625	1	0.944402	0.999487	1	26.432	29.0471	49.3557	24.3416	24.9625	0.501008	Positive_normalized on PC	C52H84O8P1N1	882.601	M883T518	882.6	882.6	8.5986	8.6546	5.29593e+07	http://metlin.scripps.edu/metabo_list.php?mass_min=881.58984&mass_max=881.59514	34.9965	36.2252	45.24	11.7092	14.7207	17.0458	25.0869	33.3615	22.7626	31.0174	97.1346	26.4008	36.0531	58.0964
PC(44:11)		880.585	8.6215		2.05498	0.117168	72.7615	0.948776	0.999154	1	1.14468	0.904415	1	0.890923	0.962298	1	0.540936	0.145242	1	16.7291	15.8721	19.1494	14.9043	9.04935	0.592931	Positive_normalized on PC	C52H82O8P1N1	880.585	M881T517_1	880.584	880.585	8.5975	8.6532	2.54305e+07	http://metlin.scripps.edu/metabo_list.php?mass_min=879.57411&mass_max=879.5794	22.1063	22.4689	24.062	8.72331	10.7088	12.1682	16.866	16.9247	13.7219	16.9698	32.9422	11.0857	10.7849	30.457
PC(44:12)		878.569	8.6036		2.81554	0.0467405	29.0258	0.737809	0.587112	1	0.734943	0.356701	1	0.871754	0.869052	1	0.440094	0.0129917	1	7.24093	5.34243	5.32167	6.31231	3.18669	0.947065	Positive_normalized on PC	C52H80O8P1N1	878.569	M879T516	878.568	878.569	8.5804	8.6216	9.11422e+06	http://metlin.scripps.edu/metabo_list.php?mass_min=877.55816&mass_max=877.56343	9.64228	8.40068	8.82213	4.47523	4.75898	6.43942	8.14779	5.49398	4.67331	5.85999	8.65198	2.98998	2.66028	10.6096
PC(44:2)		898.726	8.7082		4.69478	0.00578094	3.58996	7.13211	0.41179	1	13.3899	0.00251968	1	5.27536	0.504149	1	11.5817	0.0140881	1	2.24733	16.0282	30.0915	11.8555	26.0279	0.392447	Positive_normalized on PC	C52H100O8P1N1	898.726	M899T522	898.725	898.726	8.6858	8.7609	3.19442e+07	http://metlin.scripps.edu/metabo_list.php?mass_min=897.71508&mass_max=897.72047	1.75208	1.95805	2.45805	1.29812	1.17358	0.879775	6.21168	19.0219	12.6302	16.4326	55.451	10.0469	20.591	62.7004
PC(44:3)		896.71	8.7082		5.45224	0.00268642	1.66827	4.91112	0.549032	1	11.068	0.00109968	0.666973	2.72977	0.88901	1	7.43164	0.0542982	1	1.87778	9.22202	20.7834	5.12592	13.955	0.192524	Positive_normalized on PC	C52H98O8P1N1	896.71	M897T522	896.71	896.71	8.6858	8.7609	1.88735e+07	http://metlin.scripps.edu/metabo_list.php?mass_min=895.69962&mass_max=895.705	1.68239	1.64427	2.42843	1.27475	0.911965	0.883627	4.31906	10.7759	6.81015	10.08	38.6467	6.38953	11.6787	42.111
PC(44:4)		894.694	8.6913		6.80929	0.000750912	0.466317	3.50572	0.339596	1	6.79653	0.000226033	0.152437	1.92369	0.867768	1	3.92325	0.0919062	1	5.1251	17.9672	34.8329	9.85909	20.107	0.248771	Positive_normalized on PC	C52H96O8P1N1	894.695	M895T521	894.694	894.695	8.6679	8.7256	3.11932e+07	http://metlin.scripps.edu/metabo_list.php?mass_min=893.68393&mass_max=893.6893	5.13682	3.94575	6.73997	3.04229	3.06071	2.58535	11.3648	22.6766	11.0121	20.2129	62.8925	10.9702	19.757	52.4108
PC(44:5)		892.679	8.6798		7.77666	0.000324233	0.201349	3.4335	0.166786	1	5.70993	0.000119348	0.0576468	1.56027	0.937947	1	3.04859	0.141103	1	10.7152	36.7906	61.183	16.7186	32.6662	0.361283	Positive_normalized on PC	C52H94O8P1N1	892.679	M893T521	892.678	892.679	8.65	8.7251	5.48337e+07	http://metlin.scripps.edu/metabo_list.php?mass_min=891.66818&mass_max=891.67354	10.1261	8.87804	13.679	7.27692	6.49086	5.53051	23.0249	48.4088	19.8634	42.0996	109.72	19.6655	35.2686	83.506
PC(44:6)		890.663	8.6743		9.99279	5.67901e-05	0.0352666	3.08823	0.169466	1	5.4027	3.58927e-05	0.0213856	1.13125	0.999517	1	3.02424	0.0756475	1	9.55023	29.4933	51.597	10.8037	28.8822	0.350802	Positive_normalized on PC	C52H92O8P1N1	890.663	M891T520	890.662	890.664	8.5644	8.7251	4.55687e+07	http://metlin.scripps.edu/metabo_list.php?mass_min=889.65255&mass_max=889.65789	7.74389	8.677	13.3286	7.45451	6.15796	4.81869	18.671	35.5069	18.7933	34.1796	91.6214	19.1539	40.0879	79.6981
PC(44:7)		888.647	8.6552		7.94527	0.000281577	0.17486	2.44789	0.444281	1	4.98737	8.5243e-05	0.0778698	1.39436	0.966389	1	2.86382	0.101802	1	11.3996	27.9051	56.8541	15.8952	32.6464	0.452803	Positive_normalized on PC	C52H90O8P1N1	888.648	M889T519	888.647	888.648	8.4369	8.7072	5.13127e+07	http://metlin.scripps.edu/metabo_list.php?mass_min=887.63681&mass_max=887.64214	12.7229	10.9786	17.8802	6.93624	6.60024	6.64341	18.0356	34.3757	18.287	31.0524	104.316	22.0887	38.7605	84.2997
PC(44:8)		886.632	8.6391		4.22927	0.00945679	5.87267	1.92179	0.748331	1	3.83848	0.00256588	1	1.53785	0.885171	1	2.03434	0.493332	1	20.9576	40.2761	80.4454	32.2297	42.6349	0.419924	Positive_normalized on PC	C52H88O8P1N1	886.632	M887T518	886.631	886.632	8.6142	8.6893	7.55746e+07	http://metlin.scripps.edu/metabo_list.php?mass_min=885.6212&mass_max=885.62652	27.7739	23.115	38.3305	8.59896	11.4871	8.46419	28.9336	53.1989	21.352	46.2775	153.762	33.2958	51.3676	60.165
PC(44:9)		884.616	8.6381		2.98102	0.0384614	23.8845	1.37307	0.92689	1	2.41832	0.0165638	1	1.14262	0.994092	1	1.36932	0.862376	1	31.9017	43.8033	77.1485	36.4516	43.6838	0.556461	Positive_normalized on PC	C52H86O8P1N1	884.616	M885T518	884.616	884.616	8.6142	8.671	8.01576e+07	http://metlin.scripps.edu/metabo_list.php?mass_min=883.60544&mass_max=883.61075	38.4983	38.2435	57.6982	14.0716	20.5564	14.0165	40.2274	53.6685	27.5667	50.1748	154.588	35.8918	52.5726	68.517
PC(45:1)		914.757	8.7082		3.54413	0.0201198	12.4944	56.785	0.636852	1	121.132	0.0145087	1	65.4263	0.297259	1	127.605	0.0132239	1	0.0141747	0.804909	1.717	0.927396	1.80876	-0.160884	Positive_normalized on PC	C53H104O8P1N1	914.757	M915T522	914.757	914.758	8.6698	8.7434	1.99628e+06	http://metlin.scripps.edu/metabo_list.php?mass_min=913.74683&mass_max=913.75232	0.0187663	0	0	0	0	0	0.0804563	0.695624	0.798875	0.920228	3.48239	0.575617	1.19838	3.15198
PC(45:2)		912.741	8.6916		4.26736	0.00907789	5.63737	43.7856	0.181853	1	56.2942	0.0102573	1	26.5004	0.387865	1	63.1921	0.00545132	1	0.0543657	2.38043	3.06048	1.44071	3.43548	0.430315	Positive_normalized on PC	C53H102O8P1N1	912.742	M913T521	912.741	912.741	8.6679	8.7264	3.80113e+06	http://metlin.scripps.edu/metabo_list.php?mass_min=911.73065&mass_max=911.73613	0	0.0317395	0	0	0.0258212	0	0.322999	2.66693	1.76915	2.70522	5.54958	1.07067	1.8999	6.83821
PC(45:3)		910.726	8.6881		4.12365	0.0105987	6.58177	30.1357	0.388284	1	53.4952	0.00562754	1	14.4898	0.786563	1	44.8361	0.0305354	1	0.0271165	0.817175	1.4506	0.392913	1.2158	0.211592	Positive_normalized on PC	C53H100O8P1N1	910.726	M911T521	910.725	910.726	8.6168	8.7251	1.45723e+06	http://metlin.scripps.edu/metabo_list.php?mass_min=909.71521&mass_max=909.72067	0	0.0294713	0.0140988	0	0.0344695	0	0.111776	1.01847	0.587012	0.846042	2.80446	0.318237	0.890861	3.24079
PC(45:4)		908.71	8.6546		4.27297	0.00902341	5.60354	5.87839	0.531949	1	12.9617	0.00134729	0.946532	6.02076	0.286976	1	7.44542	0.140412	1	0.194892	1.14565	2.52612	1.1734	1.45105	-0.0521199	Positive_normalized on PC	C53H98O8P1N1	908.71	M909T519	908.71	908.711	8.6142	8.7251	2.41124e+06	http://metlin.scripps.edu/metabo_list.php?mass_min=907.69981&mass_max=907.70526	0.174513	0.154243	0.211981	0.0442224	0.165852	0.0423206	0.571111	1.24767	0.836727	1.35255	4.99943	0.627657	1.52408	4.47297
PC(45:5)		906.694	8.6539		5.0794	0.00389705	2.42007	3.01816	0.776027	1	8.17703	0.000949245	0.639151	2.62086	0.754331	1	4.28749	0.219645	1	0.553872	1.67167	4.52902	1.45162	2.37472	0.234449	Positive_normalized on PC	C53H96O8P1N1	906.695	M907T519	906.694	906.695	8.6321	8.7072	3.8962e+06	http://metlin.scripps.edu/metabo_list.php?mass_min=905.6839&mass_max=905.68934	0.513744	0.32889	0.652547	0.379141	0.55177	0.174321	1.27669	1.84357	0.980167	2.19128	9.00085	1.25373	2.79416	7.50714
PC(45:6)		904.679	8.6538		4.46654	0.00734344	4.56028	2.19011	0.769069	1	4.92757	0.0017952	1	1.85069	0.813199	1	2.52287	0.407752	1	0.515929	1.12994	2.54228	0.954824	1.30162	0.245955	Positive_normalized on PC	C53H94O8P1N1	904.679	M905T519	904.678	904.679	8.6142	8.7072	2.3749e+06	http://metlin.scripps.edu/metabo_list.php?mass_min=903.66824&mass_max=903.67367	0.314056	0.354213	0.450513	0.335802	0.129294	1.1871	0.840521	1.45733	0.742544	1.18995	4.77833	0.746151	1.59511	4.85377
PC(45:7)		902.663	8.6369		3.56141	0.0197313	12.2531	1.39898	0.980089	1	3.51105	0.00623617	1	1.57831	0.844543	1	1.84709	0.634216	1	0.6658	0.931442	2.33766	1.05084	1.22979	0.512313	Positive_normalized on PC	C53H92O8P1N1	902.663	M903T518	902.663	902.663	8.5989	8.6901	2.3061e+06	http://metlin.scripps.edu/metabo_list.php?mass_min=901.65237&mass_max=901.65778	0.42939	0.396876	0.611381	1.00975	0.321878	1.18495	0.706375	1.19836	0.498422	1.09755	4.13564	0.775945	1.42994	4.1378
PC(45:8)		900.647	8.6367		6.22853	0.00127688	0.792943	1.39857	0.984356	1	4.18803	0.00120888	0.673505	0.906075	0.999842	1	1.63764	0.8477	1	0.283431	0.396399	1.18702	0.25681	0.464157	0.735451	Positive_normalized on PC	C53H90O8P1N1	900.648	M901T518	900.647	900.647	8.5964	8.655	947918	http://metlin.scripps.edu/metabo_list.php?mass_min=899.63651&mass_max=899.64192	0.349797	0.370343	0.409983	0.340197	0.079534	0.281345	0.152817	0.472529	0.186237	0.530431	2.40582	0.498289	0.737457	1.66258
PC(46:0)		930.789	8.7032		3.63056	0.018255	11.3363	63.1704	0.92732	1	247.956	0.0121776	1	52.0545	0.912418	1	200.827	0.0621325	1	0.0050439	0.318625	1.25067	0.262558	1.01295	-0.630693	Positive_normalized on PC	C54H108O8P1N1	930.789	M931T522	930.789	930.79	8.6865	8.7256	1.10769e+06	http://metlin.scripps.edu/metabo_list.php?mass_min=929.77853&mass_max=929.78411	0	0	0.0146785	0	0	0.00936743	0.0112614	0.298999	0.253353	0.403524	3.08626	0.353078	1.02491	1.47716
PC(46:1)		928.773	8.6904		3.53312	0.0203715	12.6507	272.37	0.599613	1	568.473	0.0125678	1	296.401	0.307286	1	577.704	0.0153562	1	0.0109821	2.9912	6.24303	3.2551	6.3444	-0.11532	Positive_normalized on PC	C54H106O8P1N1	928.773	M929T521	928.773	928.774	8.667	8.7251	7.10651e+06	http://metlin.scripps.edu/metabo_list.php?mass_min=927.7624&mass_max=927.76797	0	0	0	0	0.0246086	0.0139817	0.0382843	3.29979	2.34384	3.32996	13.1669	1.86227	4.32559	10.3403
PC(46:10)		910.632	8.6037		7.49811	0.000410699	0.255044	2.06378	0.465836	1	3.78771	0.000265001	0.184027	0.994692	1	1	1.74268	0.589022	1	9.1432	18.8695	34.6318	9.09467	15.9336	0.474745	Positive_normalized on PC	C54H88O8P1N1	910.632	M911T516	910.631	910.632	8.5771	8.6213	3.04258e+07	http://metlin.scripps.edu/metabo_list.php?mass_min=909.62107&mass_max=909.62653	10.2163	10.7631	16.2371	4.93624	5.86153	3.50495	12.4832	23.1598	12.3954	21.0534	65.9715	15.2099	20.4619	47.3163
PC(46:11)		908.616	8.6026		4.4072	0.00781983	4.85612	1.41827	0.858171	1	2.45179	0.00605967	1	0.930301	0.999454	1	1.28419	0.915658	1	4.86791	6.90403	11.9351	4.52862	6.25131	0.65182	Positive_normalized on PC	C54H86O8P1N1	908.616	M909T516	908.615	908.616	8.5771	8.6213	1.19268e+07	http://metlin.scripps.edu/metabo_list.php?mass_min=907.60527&mass_max=907.61072	5.06314	5.97068	7.23388	3.12414	3.81933	2.49886	6.36535	7.67025	5.45122	7.59062	22.2596	5.17147	6.46826	19.6777
PC(46:12)		906.599	8.6098		3.15781	0.0312997	19.4371	1.12528	0.998736	1	2.38176	0.0221823	1	0.956422	0.999947	1	1.35933	0.878767	1	1.28768	1.44899	3.06693	1.23156	1.75038	2.06507	Positive_normalized on PC	C54H84O8P1N1	906.601	M907T517	906.598	906.6	8.5624	8.6369	3.11226e+06	http://metlin.scripps.edu/metabo_list.php?mass_min=905.58834&mass_max=905.59378	1.12519	1.60778	1.89004	0.967076	0.997374	0.88244	1.54384	1.48695	1.28216	1.57787	5.90211	1.29758	1.63037	5.55987
PC(46:2)		926.757	8.6883		3.83996	0.0144573	8.97801	68.9755	0.153104	1	72.398	0.0326812	1	40.2078	0.377112	1	96.1639	0.00498846	1	0.117936	8.13469	8.53833	4.74195	11.3412	0.175699	Positive_normalized on PC	C54H104O8P1N1	926.757	M927T521	926.757	926.757	8.6679	8.7251	1.18876e+07	http://metlin.scripps.edu/metabo_list.php?mass_min=925.74649&mass_max=925.75205	0.0235209	0.0578545	0.179494	0.0775183	0.0447629	0.143645	0.298756	9.45299	5.82748	9.1236	17.2422	3.23694	4.96426	16.6924
PC(46:3)		924.742	8.6744		3.83293	0.0145703	9.04815	22.8998	0.171998	1	26.3306	0.0208686	1	9.19837	0.747875	1	29.1387	0.0131696	1	0.228889	5.24151	6.02678	2.1054	6.66951	-0.00782262	Positive_normalized on PC	C54H102O8P1N1	924.742	M925T520	924.741	924.742	8.6567	8.7259	7.3076e+06	http://metlin.scripps.edu/metabo_list.php?mass_min=923.73101&mass_max=923.73656	0.278729	0.179546	0.352955	0.0430353	0.105858	0.0462661	0.595831	6.04327	3.8325	5.84875	12.026	1.76149	3.3915	11.9251
PC(46:4)		922.726	8.6368		3.16835	0.0309199	19.2013	7.04076	0.46749	1	11.9843	0.0111713	1	9.45765	0.062957	1	10.1845	0.0497642	1	1.85681	13.0733	22.2525	17.561	18.9107	0.198003	Positive_normalized on PC	C54H100O8P1N1	922.726	M923T518_2	922.725	922.726	8.6142	8.6893	2.72353e+07	http://metlin.scripps.edu/metabo_list.php?mass_min=921.71518&mass_max=921.72072	2.35362	1.34134	2.61226	0.745809	1.04073	0.372195	4.53169	15.8839	9.19147	14.1447	44.5931	7.59489	13.5832	35.0563
PC(46:5)		920.71	8.6367		3.36501	0.0246594	15.3135	5.67723	0.49118	1	10.2695	0.00693252	1	4.60313	0.496038	1	7.84719	0.0706716	1	4.4913	25.4981	46.1233	20.674	35.2441	0.361284	Positive_normalized on PC	C54H98O8P1N1	920.71	M921T518	920.71	920.71	8.6142	8.6893	4.84116e+07	http://metlin.scripps.edu/metabo_list.php?mass_min=919.69939&mass_max=919.70491	4.74005	3.61997	5.95966	2.52173	2.95537	1.55186	10.0905	31.6351	16.0154	28.8439	92.0878	14.8474	29.2197	73.7939
PC(46:6)		918.694	8.6378		5.1593	0.00359542	2.23276	4.53662	0.385115	1	8.5821	0.00094286	0.632343	2.50778	0.827471	1	5.14127	0.115194	1	3.84309	17.4346	32.9818	9.63761	19.7583	0.176962	Positive_normalized on PC	C54H96O8P1N1	918.695	M919T518	918.694	918.695	8.6142	8.6893	3.03593e+07	http://metlin.scripps.edu/metabo_list.php?mass_min=917.68391&mass_max=917.68942	3.95062	3.25248	5.02015	2.84505	2.55161	1.78842	7.49329	21.9225	11.0728	19.3086	64.5841	10.2485	20.8534	58.1885
PC(46:7)		916.679	8.6358		5.95219	0.00165627	1.02855	3.98683	0.36542	1	7.56648	0.000591507	0.318509	1.85273	0.946268	1	4.30447	0.133028	1	4.9824	19.864	37.6993	9.23107	21.4466	0.253644	Positive_normalized on PC	C54H94O8P1N1	916.679	M917T518	916.678	916.679	8.613	8.6893	3.33262e+07	http://metlin.scripps.edu/metabo_list.php?mass_min=915.6682&mass_max=915.6737	5.17088	4.32871	7.40179	2.98743	3.15752	1.93099	9.89953	25.2806	11.2016	23.1098	72.6797	12.1021	23.2182	55.7577
PC(46:8)		914.663	8.6213		6.29495	0.00120037	0.745428	4.11279	0.290834	1	7.38143	0.000438565	0.334892	1.62008	0.979078	1	3.5732	0.270917	1	6.85244	28.1826	50.5808	11.1015	24.4851	0.265066	Positive_normalized on PC	C54H92O8P1N1	914.663	M915T517	914.663	914.663	8.5975	8.6534	4.19763e+07	http://metlin.scripps.edu/metabo_list.php?mass_min=913.65254&mass_max=913.65803	7.83658	6.31668	12.782	2.9766	3.2383	2.05499	12.7619	39.0599	12.4247	33.0633	92.3957	18.1677	28.3866	42.7199
PC(46:9)		912.647	8.6173		8.86347	0.000134009	0.0832196	2.85509	0.328753	1	5.59384	8.83817e-05	0.0463794	1.13351	0.999643	1	2.67237	0.239125	1	8.7431	24.9624	48.9075	9.91043	23.3648	0.287495	Positive_normalized on PC	C54H90O8P1N1	912.648	M913T517	912.647	912.648	8.5785	8.6381	4.04016e+07	http://metlin.scripps.edu/metabo_list.php?mass_min=911.63688&mass_max=911.64235	9.99871	9.07977	17.3524	3.87453	4.57984	2.90899	13.4075	32.9857	13.3913	28.5101	94.6118	20.7436	38.0269	50.2624
PC(47:2)		940.772	8.667		2.71475	0.0526847	32.7172	62.6534	0.523186	1	73.5658	0.180443	1	41.0158	0.666476	1	121.541	0.0143866	1	0.00843255	0.528328	0.620347	0.345868	1.0249	0.481406	Positive_normalized on PC	C55H106O8P1N1	940.773	M941T520	940.772	940.773	8.6339	8.7072	946124	http://metlin.scripps.edu/metabo_list.php?mass_min=939.76181&mass_max=939.76745	0	0	0	0	0	0.0298462	0.0291817	0.653328	0.366066	0.56559	1.68754	0.19489	0.372321	1.20496
PC(47:3)		938.757	8.6567		0.533884	0.712039	442.176	0.819478	0.997575	1	1.42516	0.87486	1	0.949251	0.999955	1	1.58221	0.735797	1	0.279177	0.22878	0.397871	0.265009	0.441718	0.0562766	Positive_normalized on PC	C55H104O8P1N1	938.757	M939T519	938.757	938.758	8.6158	8.7072	591644	http://metlin.scripps.edu/metabo_list.php?mass_min=937.74657&mass_max=937.7522	0.173771	0.254978	0.335505	0.22411	0.241137	0.359936	0.364802	0.338007	0.248841	0.0994902	1.11715	0.0942852	0.218241	0.810128
PC(47:4)		936.742	8.6203		3.1256	0.0324913	20.1771	54.7308	0.655745	1	129.441	0.00768183	1	74.5297	0.188181	1	90.7835	0.0981905	1	0.0129634	0.7095	1.678	0.966161	1.17687	-0.210553	Positive_normalized on PC	C55H102O8P1N1	936.742	M937T517_2	936.741	936.742	8.5975	8.639	1.74993e+06	http://metlin.scripps.edu/metabo_list.php?mass_min=935.73117&mass_max=935.73679	0	0.0301631	0.0111548	0.0171081	0.00924766	0	0.0230705	0.796331	0.454139	0.878029	3.60802	0.562146	1.15172	2.7208
PC(47:5)		934.726	8.6189		2.55889	0.0634848	39.424	16.4618	0.497904	1	26.2922	0.03086	1	15.4407	0.334774	1	25.4302	0.0487622	1	0.148803	2.44956	3.91236	2.29762	3.78409	0.430824	Positive_normalized on PC	C55H100O8P1N1	934.726	M935T517	934.725	934.726	8.5964	8.6532	4.70333e+06	http://metlin.scripps.edu/metabo_list.php?mass_min=933.71493&mass_max=933.72053	0.159354	0.0670431	0.252959	0.0332966	0.0984236	0.0105384	0.420007	2.96992	1.71711	2.66166	8.11366	1.29457	2.55526	6.60148
PC(47:6)		932.71	8.619		4.15669	0.0102264	6.35056	8.54947	0.530408	1	18.8841	0.0020052	1	6.46361	0.587649	1	10.1284	0.194981	1	0.125337	1.07157	2.36687	0.81013	1.26946	0.270864	Positive_normalized on PC	C55H98O8P1N1	932.71	M933T517	932.71	932.711	8.5804	8.6532	2.13205e+06	http://metlin.scripps.edu/metabo_list.php?mass_min=931.69943&mass_max=931.70502	0.163056	0.0785946	0.165256	0.108341	0.0988185	0.0488477	0.214446	1.33303	0.778482	1.10318	4.76878	0.748808	1.54936	4.73562
PC(47:7)		930.694	8.6036		6.03835	0.00152641	0.947899	5.94139	0.488678	1	13.6859	0.000461869	0.288727	2.57031	0.952028	1	5.78337	0.329271	1	0.125893	0.747976	1.72295	0.323583	0.728083	0.421808	Positive_normalized on PC	C55H96O8P1N1	930.695	M931T516	930.694	930.695	8.5803	8.6524	1.34847e+06	http://metlin.scripps.edu/metabo_list.php?mass_min=929.68365&mass_max=929.68923	0.152208	0.0636747	0.0987868	0.127258	0.0455217	0.074086	0.319714	0.838998	0.517957	0.886974	3.14975	0.483972	1.01077	3.32484
PC(47:9)		926.663	8.5809		11.5912	1.84388e-05	0.0114505	2.88795	0.969507	1	18.36	2.33373e-05	0.00827069	1.13591	0.999997	1	4.60052	0.624321	1	0.0222526	0.0642645	0.408557	0.025277	0.102374	0.207676	Positive_normalized on PC	C55H92O8P1N1	926.663	M927T515	926.662	926.664	8.5771	8.6368	241747	http://metlin.scripps.edu/metabo_list.php?mass_min=925.65256&mass_max=925.65812	0.0102646	0	0.0799414	0	0.00553116	0.0280552	0.0319759	0.0706761	0.0417562	0.0803611	0.680082	0.157757	0.234534	0.765947
PC(48:0)		958.82	8.6703		3.49196	0.0213424	13.2537	#N/A	0.99635	1	#N/A	0.0166901	1	#N/A	0.998874	1	#N/A	0.191085	1	0	0.0709196	0.619942	0.0405455	0.40547	-0.278378	Positive_normalized on PC	C56H112O8P1N1	958.82	M959T520	958.82	958.82	8.6524	8.7079	459240	http://metlin.scripps.edu/metabo_list.php?mass_min=957.80942&mass_max=957.81518	0	0	0	0	0	0	0	0.0891229	0.0192439	0.104392	1.6542	0.164936	0.446156	0.804995
PC(48:1)		956.804	8.6553		3.34529	0.0252217	15.6627	118.035	0.951387	1	504.549	0.0166478	1	104.49	0.924823	1	406.03	0.0798831	1	0.00415056	0.489912	2.09416	0.433692	1.68525	-0.0177444	Positive_normalized on PC	C56H110O8P1N1	956.804	M957T519	956.804	956.805	8.6167	8.7072	1.85935e+06	http://metlin.scripps.edu/metabo_list.php?mass_min=955.79352&mass_max=955.79927	0	0	0.015279	0	0	0	0.0137749	0.759246	0.292883	0.417606	4.74478	0.712636	1.52006	3.42442
PC(48:10)		938.663	8.5855		12.8653	8.03475e-06	0.00498958	4.75477	0.0424916	1	7.58008	5.51284e-06	0.0116774	1.01035	1	1	2.86251	0.31577	1	2.33906	11.1217	17.7303	2.36326	6.6956	0.38613	Positive_normalized on PC	C56H92O8P1N1	938.663	M939T515	938.663	938.663	8.5591	8.6197	1.39041e+07	http://metlin.scripps.edu/metabo_list.php?mass_min=937.65235&mass_max=937.65798	2.53955	2.17314	4.2361	1.04676	1.33813	0.630535	4.40924	14.7023	6.12246	12.5404	31.8838	7.76036	12.5615	24.9998
PC(48:11)		936.647	8.5672		9.22827	0.000100916	0.0626689	3.14975	0.361368	1	6.543	8.68374e-05	0.0346567	0.958302	0.999998	1	2.76614	0.344964	1	1.34912	4.24938	8.82726	1.29286	3.73185	0.611096	Positive_normalized on PC	C56H90O8P1N1	936.648	M937T514	936.647	936.647	8.5411	8.5987	6.97343e+06	http://metlin.scripps.edu/metabo_list.php?mass_min=935.6365&mass_max=935.64212	1.59031	1.37066	2.25958	0.76605	0.856644	0.554436	2.04614	5.10148	2.87396	4.7727	15.3244	3.86157	6.53587	16.8391
PC(48:12)		934.63	8.5729		4.38696	0.00798974	4.96163	1.66205	0.957579	1	4.36897	0.0058954	1	0.855348	0.999644	1	2.01902	0.712073	1	0.664541	1.1045	2.90336	0.568414	1.34172	2.04607	Positive_normalized on PC	C56H88O8P1N1	934.632	M935T514	934.629	934.631	8.5436	8.6188	2.43247e+06	http://metlin.scripps.edu/metabo_list.php?mass_min=933.61952&mass_max=933.62512	0.445169	0.649742	0.506809	1.00055	0.704256	0.813714	0.531546	1.33865	0.71372	1.26114	4.44452	1.09385	1.50968	7.45267
PC(48:2)		954.789	8.655		2.95268	0.0397616	24.6919	545.151	0.60322	1	839.845	0.0863837	1	291.152	0.84128	1	1132.73	0.0183216	1	0.00251666	1.37196	2.11361	0.732731	2.8507	-0.0911635	Positive_normalized on PC	C56H108O8P1N1	954.789	M955T519	954.788	954.789	8.6321	8.6901	2.63731e+06	http://metlin.scripps.edu/metabo_list.php?mass_min=953.77796&mass_max=953.78368	0	0	0.0176166	0	0	0	0	1.77202	0.815858	1.52801	4.55937	0.847574	1.30345	3.72963
PC(48:3)		952.773	8.6547		2.82705	0.046108	28.6331	30.7036	0.270546	1	31.7171	0.0903911	1	15.3666	0.666227	1	42.5906	0.0191948	1	0.0518533	1.59209	1.64464	0.796807	2.20846	-0.364311	Positive_normalized on PC	C56H106O8P1N1	952.773	M953T519	952.773	952.774	8.6326	8.7072	2.28734e+06	http://metlin.scripps.edu/metabo_list.php?mass_min=951.76257&mass_max=951.76829	0.0167371	0.068597	0.0583691	0.0512348	0.0502569	0.0246545	0.093124	1.7502	1.19484	1.83122	3.17634	0.732337	1.08772	3.19794
PC(48:4)		950.757	8.604		3.0981	0.0335466	20.8324	78.7273	0.572376	1	161.296	0.0110615	1	83.3009	0.302518	1	134.299	0.0498758	1	0.0552471	4.34946	8.91113	4.60214	7.41964	-0.102203	Positive_normalized on PC	C56H104O8P1N1	950.757	M951T516_2	950.757	950.758	8.5804	8.6532	9.57409e+06	http://metlin.scripps.edu/metabo_list.php?mass_min=949.74667&mass_max=949.75238	0.06593	0.0227803	0.0894127	0.0179101	0.0524343	0.0090167	0.129246	5.61555	2.97914	4.45368	18.7036	3.2058	6.24745	12.8426
PC(48:5)		948.741	8.6038		2.56519	0.0630064	39.127	16.8865	0.46699	1	25.2087	0.0383156	1	12.1315	0.553583	1	25.3542	0.0471347	1	0.749061	12.649	18.8829	9.08723	18.9919	0.224261	Positive_normalized on PC	C56H102O8P1N1	948.742	M949T516	948.741	948.742	8.5804	8.6368	2.23007e+07	http://metlin.scripps.edu/metabo_list.php?mass_min=947.73072&mass_max=947.73641	0.522663	0.50622	0.846316	1.25295	0.667914	0.0780521	1.36932	15.5335	8.00058	14.413	39.2863	7.34545	12.7112	28.8006
PC(48:6)		946.726	8.6166		3.8499	0.0142994	8.87994	10.095	0.378547	1	17.7057	0.00447953	1	5.51434	0.737998	1	12.1165	0.0910759	1	1.09551	11.0591	19.3967	6.04099	13.2736	0.045105	Positive_normalized on PC	C56H100O8P1N1	946.726	M947T517	946.725	946.727	8.5804	8.639	1.88287e+07	http://metlin.scripps.edu/metabo_list.php?mass_min=945.71525&mass_max=945.72093	0.47071	0.80846	0.881949	0.318695	1.18306	2.25572	1.74995	13.046	7.99319	12.1382	39.5304	5.56089	12.2246	36.3964
PC(48:7)		944.71	8.6039		5.84535	0.00183399	1.13891	10.858	0.230216	1	19.2848	0.000671623	0.365166	3.99556	0.888191	1	10.8653	0.0992509	1	1.05563	11.462	20.3576	4.21784	11.4698	0.140401	Positive_normalized on PC	C56H98O8P1N1	944.71	M945T516	944.71	944.711	8.5803	8.6347	1.76541e+07	http://metlin.scripps.edu/metabo_list.php?mass_min=943.69952&mass_max=943.70519	0.822447	1.02863	1.5232	0.620928	0.532092	0.418806	2.44332	14.4364	7.35171	12.5979	38.8847	5.3424	12.0065	37.7037
PC(48:8)		942.694	8.6021		8.2578	0.000217655	0.135164	11.0229	0.0601453	1	16.3752	0.000142118	0.080958	2.12474	0.98916	1	7.39487	0.173307	1	1.26322	13.9244	20.6854	2.68401	9.34134	0.151241	Positive_normalized on PC	C56H96O8P1N1	942.695	M943T516	942.694	942.695	8.5771	8.6213	1.6611e+07	http://metlin.scripps.edu/metabo_list.php?mass_min=941.68386&mass_max=941.68952	1.17086	1.03088	2.29551	0.537573	0.659876	0.325467	2.82236	18.8994	6.48957	16.3841	39.348	6.848	12.0878	24.9406
PC(48:9)		940.679	8.5993		11.8328	1.56861e-05	0.00974106	8.09798	0.0324893	1	12.5906	3.0758e-05	0.00717428	1.43879	0.998328	1	5.2293	0.150082	1	1.76003	14.2527	22.1598	2.5323	9.20371	0.236542	Positive_normalized on PC	C56H94O8P1N1	940.679	M941T516	940.678	940.679	8.5606	8.6197	1.71982e+07	http://metlin.scripps.edu/metabo_list.php?mass_min=939.66814&mass_max=939.67378	1.70628	1.71746	3.78287	0.772223	1.05621	0.422959	2.86218	19.8891	7.01378	15.8551	41.8496	8.45201	16.3537	25.6827
PC(49:1)		970.819	8.6343		1.22452	0.325611	202.204	0.839337	0.999977	1	3.68172	0.329401	1	1.00563	1	1	3.19505	0.538343	1	0.0483195	0.0405563	0.177899	0.0485914	0.154383	0.549109	Positive_normalized on PC	C57H112O8P1N1	970.82	M971T518	970.819	970.82	8.5975	8.6567	184187	http://metlin.scripps.edu/metabo_list.php?mass_min=969.80859&mass_max=969.81442	0.0148479	0.0547408	0.0738659	0.0391491	0.0209343	0.0756705	0.0590278	0.0288875	0.0483725	0.044409	0.48812	0.0734545	0.197194	0.183353
PC(49:4)		964.773	8.5812		3.84255	0.0144161	8.95239	#N/A	0.986149	1	#N/A	0.00833479	1	#N/A	0.975171	1	#N/A	0.149649	1	0	0.0832179	0.557709	0.0757474	0.356386	-0.121382	Positive_normalized on PC	C57H106O8P1N1	964.773	M965T515	964.772	964.774	8.5606	8.619	434261	http://metlin.scripps.edu/metabo_list.php?mass_min=963.7623&mass_max=963.76809	0	0	0	0	0	0	0	0.0967452	0.0370625	0.115846	1.32335	0.212345	0.410329	0.802529
PC(49:5)		962.757	8.5843		2.18499	0.0999082	62.043	238.811	0.745783	1	481.264	0.0592128	1	214.477	0.641915	1	474.114	0.0791316	1	0.00259196	0.618986	1.24742	0.555915	1.22888	0.106808	Positive_normalized on PC	C57H104O8P1N1	962.757	M963T515	962.757	962.758	8.5417	8.619	1.40219e+06	http://metlin.scripps.edu/metabo_list.php?mass_min=961.74645&mass_max=961.75222	0.0181437	0	0	0	0	0	0	0.852914	0.361556	0.642488	2.88052	0.490456	0.808116	1.93043
PC(49:6)		960.742	8.597		1.79231	0.161954	100.574	1.32196	0.99832	1	3.68923	0.0754085	1	1.64776	0.9436	1	2.57237	0.484973	1	0.320981	0.424324	1.18417	0.528902	0.825682	-0.236519	Positive_normalized on PC	C57H102O8P1N1	960.742	M961T516	960.742	960.742	8.5801	8.619	1.22139e+06	http://metlin.scripps.edu/metabo_list.php?mass_min=959.73113&mass_max=959.7369	0.889037	0.132876	0.101084	0.409487	0.161558	0.373512	0.179314	0.501851	0.377824	0.393296	2.56746	0.432076	0.757561	2.26975
PC(49:7)		958.726	8.5833		2.67371	0.0553273	34.3582	2.22248	0.830794	1	4.20867	0.0315408	1	1.06566	0.999992	1	2.52284	0.532592	1	0.236481	0.525574	0.995269	0.252008	0.596602	0.096693	Positive_normalized on PC	C57H100O8P1N1	958.726	M959T515	958.725	958.726	8.5624	8.6203	958802	http://metlin.scripps.edu/metabo_list.php?mass_min=957.71516&mass_max=957.72091	0.31847	0.11839	0.155211	0.336883	0.128551	0.440171	0.157689	0.558131	0.486622	0.53197	2.06198	0.354689	0.549799	2.22069
PC(49:8)		956.71	8.5808		5.06591	0.00395058	2.45331	4.85304	0.809265	1	14.716	0.00183395	1	1.91997	0.996654	1	6.32294	0.404127	1	0.0236815	0.114927	0.348497	0.0454678	0.149737	0.682169	Positive_normalized on PC	C57H98O8P1N1	956.71	M957T515	956.709	956.71	8.5263	8.6012	260583	http://metlin.scripps.edu/metabo_list.php?mass_min=955.69896&mass_max=955.7047	0.0619308	0.0095991	0.00809606	0	0.0239456	0.0463288	0.01587	0.166994	0.0512642	0.126523	0.574501	0.113942	0.211455	0.782993
PC(50:0)		986.852	8.6389		3.17418	0.0307118	19.072	1.84742	0.999999	1	61.9943	0.0219385	1	1.96503	0.999997	1	27.5601	0.559674	1	0.00446587	0.00825036	0.276859	0.0087756	0.12308	-0.391939	Positive_normalized on PC	C58H116O8P1N1	986.851	M987T518	986.851	986.852	8.6158	8.6724	177020	http://metlin.scripps.edu/metabo_list.php?mass_min=985.84076&mass_max=985.84668	0	0	0.0312611	0	0	0	0	0.0165551	0.008196	0	0.907156	0.102055	0.23998	0.23808
PC(50:1)		984.836	8.6204		4.22366	0.00951401	5.9082	77.6479	0.998065	1	866.723	0.00805751	1	54.3968	0.998719	1	561.158	0.140956	1	0.0015064	0.116969	1.30563	0.0819435	0.84533	-0.0475713	Positive_normalized on PC	C58H114O8P1N1	984.835	M985T517	984.835	984.836	8.5975	8.6546	958858	http://metlin.scripps.edu/metabo_list.php?mass_min=983.82478&mass_max=983.83069	0	0	0.0105448	0	0	0	0	0.189276	0.0447053	0.116925	3.09075	0.455704	1.09929	1.9431
PC(50:10)		966.694	8.5677		11.7602	1.64636e-05	0.0102239	11.4652	0.0121781	1	15.2226	2.22433e-05	0.0102642	0.995474	1	1	5.91305	0.216119	1	0.356378	4.08594	5.42501	0.354766	2.10728	0.250931	Positive_normalized on PC	C58H96O8P1N1	966.695	M967T514	966.694	966.695	8.5263	8.586	4.24967e+06	http://metlin.scripps.edu/metabo_list.php?mass_min=965.68369&mass_max=965.68949	0.297788	0.218262	0.568079	0.404065	0.0964839	0.323832	0.586139	5.42623	2.2327	4.59889	10.1853	2.23351	3.4507	8.85584
PC(50:11)		964.678	8.5494		9.3587	9.13204e-05	0.05671	8.05202	0.0782998	1	12.7099	0.000102494	0.0476751	0.895168	0.999997	1	5.34936	0.232054	1	0.227861	1.83474	2.89609	0.203974	1.21891	0.520909	Positive_normalized on PC	C58H94O8P1N1	964.679	M965T513	964.678	964.68	8.5263	8.5834	2.26501e+06	http://metlin.scripps.edu/metabo_list.php?mass_min=963.66778&mass_max=963.67357	0.221621	0.217399	0.516293	0.0611866	0.0854424	0.0630189	0.430068	2.33303	1.14644	2.02476	4.87542	1.25301	2.07128	6.13435
PC(50:12)		962.662	8.5476		3.37132	0.0244823	15.2035	3.4833	0.427565	1	5.36809	0.0103887	1	1.54225	0.983659	1	2.30295	0.763256	1	0.20505	0.714251	1.10073	0.316238	0.47222	0.999774	Positive_normalized on PC	C58H92O8P1N1	962.663	M963T513	962.662	962.663	8.5082	8.604	1.01129e+06	http://metlin.scripps.edu/metabo_list.php?mass_min=961.65168&mass_max=961.65745	0.517253	0.10832	0.168961	0.146874	0.139806	0.222109	0.132027	0.82545	0.535112	0.78219	1.7917	0.43677	0.599611	3.00937
PC(50:2)		982.82	8.627		3.16893	0.0308993	19.1884	66.6778	0.923151	1	218.282	0.0378565	1	25.2437	0.994508	1	207.265	0.0640891	1	0.00512597	0.341789	1.11891	0.129398	1.06243	0.104888	Positive_normalized on PC	C58H112O8P1N1	982.82	M983T518	982.819	982.82	8.6158	8.6893	1.04769e+06	http://metlin.scripps.edu/metabo_list.php?mass_min=981.80898&mass_max=981.81487	0	0.0124115	0	0.0109623	0	0	0.012508	0.39716	0.226511	0.401695	2.66538	0.379747	0.824686	2.10091
PC(50:3)		980.805	8.6194		2.85095	0.0448234	27.8353	3.21637	0.984423	1	12.2801	0.0454217	1	2.17351	0.996261	1	10.8003	0.114737	1	0.0650541	0.209238	0.798872	0.141396	0.702604	-0.690227	Positive_normalized on PC	C58H110O8P1N1	980.804	M981T517	980.804	980.806	8.5808	8.6532	748384	http://metlin.scripps.edu/metabo_list.php?mass_min=979.79412&mass_max=979.80001	0.0607451	0.0350941	0.0913221	0.0825529	0.0409475	0.102691	0.0420259	0.211699	0.268124	0.147892	1.70667	0.298292	0.656078	1.30634
PC(50:4)		978.789	8.5992		3.57144	0.0195096	12.1155	62.1917	0.578188	1	138.923	0.005565	1	37.7241	0.763064	1	86.3363	0.140538	1	0.0230885	1.43591	3.20751	0.870994	1.99338	-0.599764	Positive_normalized on PC	C58H108O8P1N1	978.789	M979T516_2	978.788	978.79	8.5591	8.6893	2.85007e+06	http://metlin.scripps.edu/metabo_list.php?mass_min=977.77838&mass_max=977.78425	0.0566197	0	0	0.0214011	0	0.0409973	0.0426013	1.65672	1.21991	1.43111	7.01024	1.27816	2.41888	4.30163
PC(50:5)		976.773	8.5833		1.84803	0.151186	93.8863	2.49862	0.818717	1	3.79077	0.15692	1	1.20689	0.999633	1	3.70016	0.204524	1	1.4805	3.69921	5.61224	1.78681	5.47809	-0.140366	Positive_normalized on PC	C58H106O8P1N1	976.773	M977T515	976.773	976.773	8.5624	8.6213	6.49739e+06	http://metlin.scripps.edu/metabo_list.php?mass_min=975.76229&mass_max=975.76815	3.36562	0.685088	1.03907	1.73822	0.839735	1.76625	0.929503	4.66668	2.49296	3.93799	12.6222	2.41579	3.26148	7.83632
PC(50:6)		974.758	8.5976		2.95179	0.0398031	24.7177	5.05922	0.437512	1	6.95559	0.0395192	1	1.54917	0.997422	1	6.12786	0.107247	1	0.85396	4.32037	5.9398	1.32293	5.23294	-0.469009	Positive_normalized on PC	C58H104O8P1N1	974.757	M975T516	974.757	974.759	8.5771	8.6369	6.38151e+06	http://metlin.scripps.edu/metabo_list.php?mass_min=973.74697&mass_max=973.75282	0.592847	0.202933	0.164585	1.25821	0.663388	2.13909	0.956664	5.31156	3.19758	4.45198	12.1872	2.58226	2.95176	10.661
PC(50:7)		972.742	8.5999		1.71699	0.17775	110.383	1.95415	0.712556	1	2.45844	0.167753	1	0.86133	0.999091	1	1.91306	0.582315	1	2.09935	4.10243	5.16111	1.80823	4.01617	-0.583129	Positive_normalized on PC	C58H102O8P1N1	972.742	M973T516	972.742	972.743	8.5624	8.6213	5.96432e+06	http://metlin.scripps.edu/metabo_list.php?mass_min=971.73143&mass_max=971.73726	3.469	0.892563	0.907774	3.61156	1.03353	3.01538	1.76562	4.81012	2.89789	4.59927	10.8371	1.53234	2.27539	10.0755
PC(50:8)		970.726	8.5833		5.15987	0.00359335	2.23147	9.28925	0.104855	1	11.5166	0.00372841	1	1.09802	0.999999	1	6.4013	0.236541	1	0.448092	4.16244	5.16051	0.492015	2.86837	-0.182645	Positive_normalized on PC	C58H100O8P1N1	970.726	M971T515	970.725	970.727	8.5496	8.6188	4.54369e+06	http://metlin.scripps.edu/metabo_list.php?mass_min=969.7154&mass_max=969.72122	0.646405	0.21313	0.282568	0.81661	0.19644	0.528478	0.453013	5.29121	2.06866	5.12744	10.7351	1.32642	2.58879	7.31455
PC(50:9)		968.71	8.5816		8.23281	0.000222141	0.137949	4.9416	0.0666767	1	6.64647	0.000451336	0.263247	0.582539	0.991871	1	2.8109	0.451891	1	0.952167	4.70523	6.32855	0.554674	2.67644	0.0956303	Positive_normalized on PC	C58H98O8P1N1	968.71	M969T515	968.71	968.711	8.5505	8.6036	5.22816e+06	http://metlin.scripps.edu/metabo_list.php?mass_min=967.69948&mass_max=967.7053	2.00636	0.728182	0.356941	1.20996	0.546278	1.44833	0.36912	6.30691	2.32237	5.48641	12.4977	2.48218	3.63209	8.37732
PC(51:5)		990.788	8.5623		2.70326	0.0534109	33.1682	14.0119	0.994761	1	86.0323	0.0578967	1	10.0446	0.996533	1	76.7642	0.123263	1	0.00421642	0.05908	0.362749	0.0423521	0.323671	0.134194	Positive_normalized on PC	C59H108O8P1N1	990.789	M991T514	990.788	990.789	8.5411	8.5833	318503	http://metlin.scripps.edu/metabo_list.php?mass_min=989.77763&mass_max=989.78357	0	0	0.0158811	0	0	0.0136339	0	0.0531799	0.0633217	0.0607384	0.851499	0.190268	0.209945	0.509475
PC(51:6)		988.773	8.5682		1.84705	0.151369	94.0004	1.52788	0.999335	1	6.7164	0.0671721	1	3.34372	0.71731	1	4.77493	0.358793	1	0.051892	0.0792847	0.348527	0.173512	0.247781	0.0939489	Positive_normalized on PC	C59H106O8P1N1	988.773	M989T514	988.772	988.773	8.5428	8.6037	349578	http://metlin.scripps.edu/metabo_list.php?mass_min=987.76202&mass_max=987.76796	0.17532	0	0.0160765	0.0483124	0	0.086118	0.0374172	0.106873	0.0590837	0.0718969	0.800871	0.134603	0.14174	0.636384
PC(52:1)		1012.87	8.5976		4.58988	0.00644967	4.00524	46.1502	0.998252	1	557.905	0.00483472	1	21.8801	0.99977	1	290.718	0.245621	1	0.0019748	0.0911373	1.10175	0.0432089	0.57411	-0.0165095	Positive_normalized on PC	C60H118O8P1N1	1012.87	M1013T516	1012.87	1012.87	8.5771	8.6368	738611	http://metlin.scripps.edu/metabo_list.php?mass_min=1011.85597&mass_max=1011.86204	0	0	0.0138236	0	0	0	0	0.115448	0.0551593	0.102804	2.92656	0.395926	0.923394	1.3029
PC(52:10)		994.726	8.5626		1.95923	0.131814	81.8562	1.92127	0.485441	1	1.94459	0.247921	1	0.766333	0.97786	1	0.909316	0.999485	1	0.876038	1.68311	1.70353	0.671336	0.796595	-0.11792	Positive_normalized on PC	C60H100O8P1N1	994.726	M995T514	994.726	994.726	8.5248	8.6015	1.94436e+06	http://metlin.scripps.edu/metabo_list.php?mass_min=993.71527&mass_max=993.72124	1.57813	0.446106	0.27504	1.52762	0.454701	1.48937	0.361291	2.21597	0.939151	1.89419	3.22547	0.865884	0.828088	3.2054
PC(52:11)		992.71	8.5423		4.72019	0.00563035	3.49645	3.95791	0.364698	1	6.34966	0.00432664	1	0.95015	0.999999	1	2.14752	0.874672	1	0.146723	0.580715	0.931639	0.139409	0.315091	0.173906	Positive_normalized on PC	C60H98O8P1N1	992.71	M993T513	992.709	992.71	8.5055	8.5689	768349	http://metlin.scripps.edu/metabo_list.php?mass_min=991.69934&mass_max=991.70529	0.142266	0.103708	0.116681	0.26434	0.0486741	0.286871	0.0645194	0.771905	0.391942	0.578299	1.73826	0.314851	0.567119	2.32784
PC(52:12)		990.694	8.5208		0.89866	0.479577	297.817	0.789446	0.998031	1	1.81871	0.609261	1	1.49635	0.893272	1	0.624041	0.962251	1	0.216939	0.171261	0.394549	0.324617	0.135379	0.699079	Positive_normalized on PC	C60H96O8P1N1	990.695	M991T511	990.693	990.695	8.4901	8.5622	454375	http://metlin.scripps.edu/metabo_list.php?mass_min=989.68317&mass_max=989.68911	0.653571	0.0487801	0.101471	0.265132	0.0677561	0.239528	0.142332	0.223116	0.131254	0.159414	0.531337	0.172082	0.208376	1.35983
PC(52:2)		1010.85	8.6031		3.07878	0.0343095	21.3062	32.5468	0.980128	1	158.381	0.0342206	1	4.86461	0.999985	1	120.778	0.162495	1	0.00615643	0.200372	0.975062	0.0299486	0.743562	0.0724282	Positive_normalized on PC	C60H116O8P1N1	1010.85	M1011T516	1010.85	1010.85	8.5793	8.6368	779805	http://metlin.scripps.edu/metabo_list.php?mass_min=1009.84023&mass_max=1009.84629	0	0	0.043095	0	0	0	0	0.402027	0.110485	0.0886039	2.59481	0.186254	0.847592	1.51417
PC(52:3)		1008.84	8.5986		3.68028	0.0172662	10.7223	6.11001	0.999821	1	95.9388	0.0185173	1	3.38271	0.999976	1	67.0693	0.1613	1	0.00630069	0.0384973	0.604481	0.0213134	0.422583	-0.264513	Positive_normalized on PC	C60H114O8P1N1	1008.84	M1009T516	1008.83	1008.84	8.5771	8.6368	449661	http://metlin.scripps.edu/metabo_list.php?mass_min=1007.82492&mass_max=1007.83098	0.0125384	0	0	0	0.016006	0.0155604	0	0.0273688	0.040893	0.0472302	1.33559	0.172798	0.53235	1.01725
PC(52:4)		1006.82	8.5682		4.74713	0.00547533	3.40018	23.551	0.965653	1	130.806	0.0033093	1	9.00404	0.998126	1	71.7232	0.18648	1	0.0123277	0.29033	1.61254	0.110999	0.884183	-0.354496	Positive_normalized on PC	C60H112O8P1N1	1006.82	M1007T514	1006.82	1006.82	8.5263	8.6026	1.1474e+06	http://metlin.scripps.edu/metabo_list.php?mass_min=1005.80937&mass_max=1005.81541	0.0262402	0	0.0135216	0.0249186	0	0	0.0216136	0.351903	0.229707	0.28938	3.82741	0.606346	1.21933	1.95748
PC(52:5)		1004.8	8.5633		3.34894	0.0251167	15.5975	#N/A	0.653709	1	#N/A	0.0180096	1	#N/A	0.981231	1	#N/A	0.0816681	1	0	1.06494	2.27324	0.316091	1.84365	-0.136323	Positive_normalized on PC	C60H110O8P1N1	1004.8	M1005T514	1004.8	1004.8	8.5263	8.6203	2.06729e+06	http://metlin.scripps.edu/metabo_list.php?mass_min=1003.79351&mass_max=1003.79954	0	0	0	0	0	0	0	1.28676	0.892503	1.01556	4.83228	1.01951	1.33932	3.03005
PC(52:6)		1002.79	8.5656		3.5755	0.0194205	12.0601	186.064	0.397247	1	305.556	0.0132265	1	53.9864	0.952059	1	248.856	0.0641745	1	0.00684899	1.27435	2.09275	0.369752	1.70441	-0.326132	Positive_normalized on PC	C60H108O8P1N1	1002.79	M1003T514	1002.79	1002.79	8.5444	8.6193	2.02117e+06	http://metlin.scripps.edu/metabo_list.php?mass_min=1001.77806&mass_max=1001.78407	0	0.00887563	0	0	0	0.0326749	0.00639245	1.38147	0.962002	1.47957	4.66759	0.939685	1.26756	3.31005
PC(52:7)		1000.77	8.5654		3.3368	0.0254681	15.8157	13.5376	0.125398	1	15.1976	0.0137294	1	6.21458	0.615692	1	13.0135	0.0537688	1	0.126679	1.71492	1.92521	0.787257	1.64854	-0.436768	Positive_normalized on PC	C60H106O8P1N1	1000.77	M1001T514	1000.77	1000.77	8.5263	8.586	2.21848e+06	http://metlin.scripps.edu/metabo_list.php?mass_min=999.76252&mass_max=999.76852	0.26432	0.0335255	0.0286323	0.153127	0.0300157	0.288732	0.0884004	2.16622	1.1508	1.82776	3.90734	0.931668	0.851842	3.29114
PC(52:8)		998.758	8.5626		4.27469	0.00900684	5.59324	113.326	0.0216166	1	97.1612	0.0105387	1	28.8936	0.756049	1	76.3588	0.0661096	1	0.0182582	2.06912	1.77399	0.527546	1.39417	-0.267502	Positive_normalized on PC	C60H104O8P1N1	998.757	M999T514	998.756	998.758	8.5263	8.5996	1.98741e+06	http://metlin.scripps.edu/metabo_list.php?mass_min=997.74671&mass_max=997.7527	0.0199635	0.0289655	0.0137209	0.0247249	0	0.0217975	0.0186352	2.71754	1.31888	2.17094	3.48572	0.754008	0.589667	2.61504
PC(52:9)		996.742	8.5636		0.466986	0.759343	471.552	1.67198	0.806456	1	1.67317	0.638576	1	1.21955	0.988831	1	1.10383	0.999464	1	1.13927	1.90484	1.90619	1.3894	1.25756	-0.217944	Positive_normalized on PC	C60H102O8P1N1	996.742	M997T514	996.741	996.742	8.5055	8.5836	2.57103e+06	http://metlin.scripps.edu/metabo_list.php?mass_min=995.73101&mass_max=995.73699	2.37333	0.563162	0.56115	1.67622	0.559997	1.71837	0.522669	2.61596	1.05298	2.04558	4.06216	0.788547	0.887721	2.99741
PC(54:1)		1040.9	8.5741		3.15844	0.0312768	19.4229	3.84969	0.999998	1	165.477	0.0272593	1	4.543	0.99999	1	99.3358	0.313364	1	0.00266281	0.010251	0.440633	0.0120971	0.264513	-0.179262	Positive_normalized on PC	C62H122O8P1N1	1040.9	M1041T514	1040.9	1040.9	8.5263	8.619	304940	http://metlin.scripps.edu/metabo_list.php?mass_min=1039.88734&mass_max=1039.89359	0	0	0	0	0.0186397	0	0	0.00870404	0.0220489	0	1.27565	0.089939	0.340847	0.491012
PC(54:10)		1022.76	8.5275		8.56708	0.000169522	0.105273	104.924	0.000303381	0.157676	68.6208	0.00194092	1	11.9896	0.921712	1	44.5514	0.0700173	1	0.0104268	1.09402	0.715493	0.125013	0.464526	0.149429	Positive_normalized on PC	C62H104O8P1N1	1022.76	M1023T512	1022.76	1022.76	8.5066	8.5506	791051	http://metlin.scripps.edu/metabo_list.php?mass_min=1021.74621&mass_max=1021.75235	0.00837188	0.0263936	0.0199715	0	0	0.0182503	0	1.38878	0.787662	1.10561	1.4037	0.396515	0.218319	1.44056
PC(54:11)		1020.74	8.5075		4.14517	0.0103546	6.43018	6.95211	0.0240503	1	5.80085	0.0179766	1	1.59457	0.987701	1	2.93682	0.601681	1	0.0788344	0.548065	0.457307	0.125707	0.231523	0.394582	Positive_normalized on PC	C62H102O8P1N1	1020.74	M1021T510	1020.74	1020.74	8.4715	8.5298	488955	http://metlin.scripps.edu/metabo_list.php?mass_min=1019.73032&mass_max=1019.73644	0.0649524	0.108211	0.0538117	0.118001	0.0936525	0.0780835	0.0351292	0.727831	0.366253	0.550111	0.661451	0.191633	0.170326	1.38199
PC(54:12)		1018.73	8.5082		2.66916	0.0556285	34.5453	142.502	0.0913497	1	111.936	0.0859366	1	7.0682	0.99981	1	49.2201	0.737774	1	0.00158256	0.225519	0.177146	0.0111859	0.0778938	0.52291	Positive_normalized on PC	C62H100O8P1N1	1018.73	M1019T510	1018.72	1018.73	8.4875	8.5494	172063	http://metlin.scripps.edu/metabo_list.php?mass_min=1017.71454&mass_max=1017.72066	0	0	0	0	0	0.0110779	0	0.293288	0.185408	0.197859	0.216358	0.066437	0.0321915	0.79164
PC(54:2)		1038.88	8.5785		2.13526	0.106179	65.9369	#N/A	0.999946	1	#N/A	0.14705	1	#N/A	0.999998	1	#N/A	0.203793	1	0	0.0232596	0.400289	0.00764627	0.381327	0.205357	Positive_normalized on PC	C62H120O8P1N1	1038.88	M1039T515	1038.88	1038.88	8.5263	8.5996	342673	http://metlin.scripps.edu/metabo_list.php?mass_min=1037.8713&mass_max=1037.87754	0	0	0	0	0	0	0	0.0572714	0.0125073	0	1.33381	0.149583	0.254319	0.474313
PC(54:5)		1032.84	8.546		3.22589	0.0289303	17.9657	197.751	0.700427	1	421.3	0.0280813	1	21.2445	0.99975	1	341.054	0.111143	1	0.00212737	0.420689	0.89626	0.045195	0.725548	0.0320962	Positive_normalized on PC	C62H114O8P1N1	1032.84	M1033T513	1032.83	1032.84	8.4901	8.5849	787765	http://metlin.scripps.edu/metabo_list.php?mass_min=1031.82455&mass_max=1031.83075	0	0	0	0.0148916	0	0	0	0.540987	0.358644	0.362436	2.15987	0.440111	0.450529	1.20207
PC(54:6)		1030.82	8.5329		3.77317	0.015568	9.66775	67.8033	0.565402	1	130.744	0.0160197	1	9.53347	0.998837	1	108.463	0.0675451	1	0.00577159	0.391333	0.754602	0.0550233	0.626005	-0.0940163	Positive_normalized on PC	C62H112O8P1N1	1030.82	M1031T512	1030.82	1030.82	8.4908	8.5683	684011	http://metlin.scripps.edu/metabo_list.php?mass_min=1029.80903&mass_max=1029.81522	0	0	0	0	0.024655	0	0.0157461	0.506204	0.293452	0.374342	1.69425	0.329236	0.416863	1.15843
PC(54:7)		1028.8	8.5264		3.12146	0.0326479	20.2744	191.975	0.280739	1	234.529	0.0391337	1	38.9981	0.978227	1	226.998	0.0595326	1	0.00234245	0.449692	0.549373	0.0913512	0.531731	-0.259503	Positive_normalized on PC	C62H110O8P1N1	1028.8	M1029T512	1028.8	1028.8	8.4875	8.5683	593199	http://metlin.scripps.edu/metabo_list.php?mass_min=1027.79356&mass_max=1027.79974	0	0	0.0163972	0	0	0	0	0.511662	0.33849	0.498923	1.36753	0.262011	0.189213	0.968423
PC(54:8)		1026.79	8.5291		3.16247	0.031131	19.3324	119.525	0.0213983	1	74.7279	0.0787691	1	31.0872	0.740782	1	73.8397	0.100903	1	0.00772472	0.923298	0.577252	0.24014	0.570391	-0.20164	Positive_normalized on PC	C62H108O8P1N1	1026.79	M1027T512	1026.79	1026.79	8.4547	8.5478	786903	http://metlin.scripps.edu/metabo_list.php?mass_min=1025.77786&mass_max=1025.78402	0.018938	0	0	0.0135763	0.00887908	0.0126796	0	1.2708	0.56925	0.929841	1.35922	0.245252	0.122437	0.841707
PC(54:9)		1024.77	8.5317		3.7639	0.0157293	9.76792	14.1641	0.00704492	1	7.27959	0.136299	1	3.12051	0.89034	1	7.63342	0.128236	1	0.0821655	1.1638	0.59813	0.256398	0.627203	0.412671	Positive_normalized on PC	C62H106O8P1N1	1024.77	M1025T512	1024.77	1024.77	8.4886	8.5513	901287	http://metlin.scripps.edu/metabo_list.php?mass_min=1023.76159&mass_max=1023.76773	0.0520378	0.0685396	0.148653	0.0719585	0.077271	0.0759849	0.0807132	1.42022	0.862202	1.20898	1.2125	0.401212	0.172244	0.94076
PC(56:10)		1050.79	8.5485		2.84522	0.0451278	28.0244	0.877621	0.942688	1	0.508794	0.0190288	1	0.747598	0.364815	1	0.592171	0.0752106	1	19.2019	16.852	9.76982	14.3553	11.3708	0.373965	Positive_normalized on PC	C64H108O8P1N1	1050.79	M1051T513	1050.79	1050.79	8.3332	8.6002	2.27471e+07	http://metlin.scripps.edu/metabo_list.php?mass_min=1049.77719&mass_max=1049.78349	23.3791	15.3605	17.8184	22.1813	19.6394	16.883	19.1516	15.8343	17.1113	17.6104	14.4874	4.25384	3.15101	22.5264
PC(56:11)		1048.77	8.4975		4.43209	0.00761607	4.72958	#N/A	0.0170944	1	#N/A	0.0307523	1	#N/A	0.953264	1	#N/A	0.0401998	1	0	0.146001	0.103783	0.0202083	0.103477	0.469972	Positive_normalized on PC	C64H106O8P1N1	1048.77	M1049T510	1048.77	1048.77	8.4711	8.5298	128680	http://metlin.scripps.edu/metabo_list.php?mass_min=1047.76144&mass_max=1047.76773	0	0	0	0	0	0	0	0.129514	0.140057	0.16843	0.193969	0.0582257	0.0190525	0.335909
PC(56:5)		1060.87	8.5003		2.26536	0.0905715	56.2449	#N/A	0.998924	1	#N/A	0.110296	1		1	1	#N/A	0.222627	1	0	0.0378467	0.327037	0	0.283549	0.295304	Positive_normalized on PC	C64H118O8P1N1	1060.87	M1061T510	1060.87	1060.87	8.4482	8.5162	267069	http://metlin.scripps.edu/metabo_list.php?mass_min=1059.85549&mass_max=1059.86185	0	0	0	0	0	0	0	0.0694276	0.0152281	0.0288845	1.04192	0.0791236	0.159218	0.402455
PC(O-30:0)		690.543	9.1366		1.98435	0.127799	79.3632	0.560324	0.064375	1	0.76064	0.267301	1	0.826811	0.544517	1	0.935813	0.976604	1	13.3173	7.462	10.1297	11.0109	12.4625	0.169872	Positive_normalized on PC	C38H76O7P1N1	690.543	M691T548	690.543	690.543	9.1177	9.185	1.81979e+07	http://metlin.scripps.edu/metabo_list.php?mass_min=689.53323&mass_max=689.53738	13.0943	10.6135	10.4846	11.0829	16.3776	21.564	10.004	7.93091	6.93834	7.51677	11.6233	6.30432	8.30001	16.5111
PC(O-31:0)		704.559	9.119		1.14674	0.357713	222.14	0.700943	0.528338	1	0.772904	0.545236	1	1.06293	0.990689	1	0.990936	0.999996	1	9.36556	6.56473	7.23868	9.95498	9.28067	0.124004	Positive_normalized on PC	C39H78O7P1N1	704.559	M705T547_2	704.559	704.559	9.0999	9.1544	1.39986e+07	http://metlin.scripps.edu/metabo_list.php?mass_min=703.54887&mass_max=703.55309	12.1994	8.07336	7.50017	7.38607	10.4783	12.6562	7.2655	7.79898	5.22899	6.66621	7.93112	4.93183	7.58873	9.84528
PC(O-32:0)		718.574	9.0651		0.707364	0.59448	369.172	0.62581	0.557189	1	0.77417	0.744161	1	0.987263	0.999994	1	1.00807	0.999999	1	53.5319	33.5008	41.4428	52.85	53.9637	0.135591	Positive_normalized on PC	C40H80O7P1N1	718.575	M719T544	718.573	718.575	9.0471	9.3169	7.99762e+07	http://metlin.scripps.edu/metabo_list.php?mass_min=717.56446&mass_max=717.56878	62.3039	54.0974	30.3824	60.3449	6.78193	110.777	50.036	37.5402	29.98	32.9822	44.6475	23.7673	34.9754	63.8511
PC(O-32:1)		716.559	9.0462		4.44023	0.00755075	4.68901	0.538317	0.104066	1	0.364453	0.00174603	1	0.771365	0.430462	1	0.646094	0.129959	1	16.1262	8.68101	5.87725	12.4392	10.419	-0.0734509	Positive_normalized on PC	C40H78O7P1N1	716.559	M717T543	716.558	716.559	9.011	9.3156	1.74855e+07	http://metlin.scripps.edu/metabo_list.php?mass_min=715.54897&mass_max=715.55327	13.4193	12.8668	14.4907	12.6173	17.8617	27.9098	13.7177	9.6253	7.8817	8.53602	7.90788	4.90451	5.05231	9.78979
PC(O-33:0)		732.59	8.9044		0.646622	0.634458	393.998	0.392698	0.999524	1	2.63093	0.949421	1	0.809924	0.999987	1	4.81659	0.545072	1	6.86804	2.69707	18.0693	5.56259	33.0806	0.692742	Positive_normalized on PC	C41H82O7P1N1	732.59	M733T534	732.589	732.59	8.8509	8.9916	2.40765e+07	http://metlin.scripps.edu/metabo_list.php?mass_min=731.57966&mass_max=731.58406	3.49712	8.48203	4.9271	4.47394	9.82598	12.1325	4.73764	3.4293	2.21822	2.44368	4.40578	106.531	1.56621	4.90106
PC(O-34:0)		746.606	8.8867		5.38558	0.00286908	1.7817	0.560166	0.05922	1	0.483725	0.00263472	1	0.901333	0.882734	1	0.586428	0.0229711	1	96.1156	53.8407	46.4935	86.6322	56.3648	0.197641	Positive_normalized on PC	C42H84O7P1N1	746.606	M747T533	746.605	746.606	8.8505	9.0117	1.14046e+08	http://metlin.scripps.edu/metabo_list.php?mass_min=745.59563&mass_max=745.60011	61.0863	126.994	72.0719	90.5183	125.816	121.396	74.9266	57.3211	53.4286	50.7723	59.3202	30.2346	27.6028	69.9991
PC(O-34:1)		744.59	8.9382		3.5141	0.0208142	12.9256	0.608594	0.0715359	1	0.570624	0.00659487	1	0.806666	0.364651	1	0.717021	0.119693	1	37.9598	23.1021	21.6607	30.6209	27.2179	0.0100674	Positive_normalized on PC	C42H82O7P1N1	744.59	M745T536	744.59	744.59	8.8849	9.0473	4.61836e+07	http://metlin.scripps.edu/metabo_list.php?mass_min=743.58012&mass_max=743.58459	26.8634	41.1695	32.0366	29.4709	43.2538	57.8179	35.1063	25.3683	21.5423	22.3956	25.5824	13.2591	11.6658	25.7393
PC(O-34:2)		742.574	8.9383		4.02193	0.0118381	7.35146	0.612823	0.121534	1	0.476186	0.00278	1	0.733656	0.193022	1	0.618513	0.0439659	1	5.16595	3.16581	2.45995	3.79003	3.1952	0.144675	Positive_normalized on PC	C42H80O7P1N1	742.575	M743T536	742.572	742.575	8.8504	9.1715	5.83948e+06	http://metlin.scripps.edu/metabo_list.php?mass_min=741.56438&mass_max=741.56884	2.95723	4.79458	4.48957	3.65518	6.46427	8.48015	5.32065	3.71909	2.56738	3.21097	3.27234	1.65275	1.19175	3.70204
PC(O-35:1)		758.606	8.779		0.747356	0.569017	353.359	1.18092	0.998041	1	0.982917	1	1	0.268875	0.579084	1	0.392724	0.745617	1	22.1133	26.1141	21.7355	5.94571	8.68443	-0.21413	Positive_normalized on PC	C43H84O7P1N1	758.606	M759T527	758.606	758.608	8.7062	8.832	2.2521e+07	http://metlin.scripps.edu/metabo_list.php?mass_min=757.5959&mass_max=757.60046	78.3863	2.25907	1.31729	64.0964	3.13164	4.38986	1.21264	77.4325	0.434781	0.474996	35.3963	0.0500489	18.8902	0.979743
PC(O-35:3)		754.575	8.7798		8.76511	0.000144814	0.0899296	0.766894	0.490648	1	0.351637	0.000179248	0.116861	0.934943	0.969553	1	0.478521	0.00334751	1	2.04952	1.57176	0.720687	1.91618	0.980737	-0.560008	Positive_normalized on PC	C43H80O7P1N1	754.575	M755T527	754.575	754.575	8.7621	8.8154	2.37911e+06	http://metlin.scripps.edu/metabo_list.php?mass_min=753.56487&mass_max=753.5694	1.72985	2.33566	1.75412	1.31493	2.34471	3.0547	1.81265	2.02776	1.51321	1.17431	0.938888	0.3295	0.282651	1.01498
PC(O-35:4)		752.559	8.8153		3.6882	0.017114	10.6278	0.751883	0.789357	1	0.301773	0.0106224	1	0.862225	0.920583	1	0.435811	0.0574292	1	3.32798	2.50225	1.0043	2.86947	1.45037	-0.335697	Positive_normalized on PC	C43H78O7P1N1	752.559	M753T529	752.559	752.559	8.7964	8.8513	3.71882e+06	http://metlin.scripps.edu/metabo_list.php?mass_min=751.54907&mass_max=751.55358	3.30599	2.33854	2.44989	1.88527	2.33237	8.60471	2.37913	3.0586	2.10282	2.34534	1.14966	0.578172	0.699766	1.0816
PC(O-35:5)		750.543	8.7982		4.05972	0.0113605	7.05486	4.24777	0.0218821	1	0.204185	0.764601	1	0.730871	0.993542	1	0.204687	0.788114	1	1.00795	4.28152	0.205808	0.736678	0.206314	0.0363791	Positive_normalized on PC	C43H76O7P1N1	750.543	M751T528	750.543	750.544	8.7451	8.8154	1.70123e+06	http://metlin.scripps.edu/metabo_list.php?mass_min=749.53314&mass_max=749.53765	1.08041	0.838356	0.953442	0.910394	1.25173	0.918586	1.10271	1.06252	10.6748	1.10724	0.319519	0.0803039	0.0944955	0.50835
PC(O-36:0)		774.637	8.8144		0.725818	0.582642	361.82	0.607583	0.999972	1	5.27067	0.645772	1	5.74163	0.5614	1	5.64593	0.61107	1	3.02287	1.83664	15.9326	17.3562	17.0669	0.113199	Positive_normalized on PC	C44H88O7P1N1	774.637	M775T529	774.635	774.639	8.6853	8.9363	1.81883e+07	http://metlin.scripps.edu/metabo_list.php?mass_min=773.62691&mass_max=773.63155	1.51672	3.49974	2.83829	1.84292	4.65757	4.56802	2.23683	1.99257	1.89022	1.62715	2.03968	0.0206808	0.507747	3.13451
PC(O-36:1)		772.621	8.7971		1.91633	0.138969	86.2997	0.424587	0.234168	1	0.65001	0.435586	1	0.518323	0.179672	1	0.371386	0.0661317	1	20.7729	8.81989	13.5026	10.767	7.71476	0.178126	Positive_normalized on PC	C44H86O7P1N1	772.621	M773T528	772.621	772.622	8.777	8.9571	2.20346e+07	http://metlin.scripps.edu/metabo_list.php?mass_min=771.61121&mass_max=771.61585	9.50668	21.5603	16.0572	19.5396	28.3586	33.8825	16.5051	9.35902	8.4706	8.63005	11.8709	49.6277	2.92531	13.4972
PC(O-36:2)		770.606	8.8155		5.22035	0.00338181	2.1001	0.558076	0.0856682	1	0.383715	0.000862226	0.556651	0.5742	0.024116	1	0.490603	0.00838783	1	15.2167	8.49207	5.83888	8.73743	7.46536	-0.145911	Positive_normalized on PC	C44H84O7P1N1	770.606	M771T529	770.604	770.606	8.7947	9.0295	1.51516e+07	http://metlin.scripps.edu/metabo_list.php?mass_min=769.59582&mass_max=769.60044	6.75775	15.8451	13.1069	13.8827	18.5988	25.7129	12.6129	8.97924	8.4588	8.03817	10.7395	0.430172	2.1711	11.9819
PC(O-36:3)		768.59	8.7589		10.5378	3.82694e-05	0.0237653	0.429076	0.00575568	1	0.251215	1.26538e-05	0.00894337	0.608423	0.0149179	1	0.380041	0.000231864	0.14085	99.8639	42.8492	25.0873	60.7595	37.9524	0.11384	Positive_normalized on PC	C44H82O7P1N1	768.59	M769T526	768.59	768.59	8.7219	8.7788	8.76136e+07	http://metlin.scripps.edu/metabo_list.php?mass_min=767.57998&mass_max=767.58459	58.2267	110.421	64.4815	91.8507	153.242	151.161	69.6643	46.7085	43.9044	37.9349	44.4497	11.0071	10.4868	39.1227
PC(O-36:4)		766.574	8.7805		5.59673	0.00233188	1.44809	0.462524	0.0460363	1	0.297994	0.000496339	0.334318	0.700997	0.206845	1	0.517562	0.0234217	1	93.5666	43.2768	27.8823	65.59	48.4265	0.101011	Positive_normalized on PC	C44H80O7P1N1	766.575	M767T527	766.574	766.575	8.7621	8.8484	8.92708e+07	http://metlin.scripps.edu/metabo_list.php?mass_min=765.56434&mass_max=765.56894	77.0141	81.7695	65.844	87.2354	117.564	140.276	85.2633	49.538	37.4348	42.8575	38.9913	9.97024	12.3022	32.8523
PC(O-36:5)		764.559	8.7957		11.7833	1.62111e-05	0.0100671	0.341263	0.00185383	1	0.217489	4.35721e-06	0.00340512	0.623642	0.0225191	1	0.330915	0.000103731	0.0786896	16.2317	5.53926	3.53021	10.1227	5.37131	-0.186555	Positive_normalized on PC	C44H78O7P1N1	764.559	M765T528	764.559	764.559	8.7769	8.8331	1.30646e+07	http://metlin.scripps.edu/metabo_list.php?mass_min=763.54891&mass_max=763.5535	11.1189	12.557	10.0501	19.4181	20.317	24.5809	15.5798	5.37946	5.59402	5.64431	2.47713	7.46779	0.363347	2.64468
PC(O-37:3)		782.605	8.7246		0.74966	0.567572	352.462	0.394584	0.779222	1	0.941736	0.999882	1	0.521159	0.766931	1	0.252414	0.454146	1	13.6358	5.38045	12.8413	7.1064	3.44186	0.495218	Positive_normalized on PC	C45H84O7P1N1	782.606	M783T523	782.605	782.606	8.6858	8.7611	1.48794e+07	http://metlin.scripps.edu/metabo_list.php?mass_min=781.59529&mass_max=781.59998	5.98668	16.8414	9.47973	12.9155	20.5783	20.6662	8.98251	5.8122	5.25048	5.07868	5.63155	1.08478	70.8084	4.60121
PC(O-37:4)		780.59	8.7451		5.54559	0.00245126	1.52223	0.428927	0.0216817	1	0.658464	0.0967803	1	0.661435	0.100355	1	0.310342	0.000536878	0.346018	22.5707	9.68121	14.862	14.9291	7.00465	0.0480356	Positive_normalized on PC	C45H82O7P1N1	780.59	M781T525	780.59	780.59	8.7219	8.7788	2.31304e+07	http://metlin.scripps.edu/metabo_list.php?mass_min=779.57999&mass_max=779.58467	15.8847	22.8984	18.6777	20.8387	28.4677	31.0389	20.1891	10.5498	8.88537	9.6085	9.16366	19.6062	21.6165	7.09288
PC(O-37:5)		778.575	8.7442		20.4801	1.36573e-07	8.48117e-05	0.352052	0.000329629	0.160167	0.150689	8.91219e-09	4.24821e-05	0.550765	0.00098418	0.561819	0.211227	1.11486e-06	0.000503995	7.71811	2.71718	1.16304	4.25086	1.63027	-0.36293	Positive_normalized on PC	C45H80O7P1N1	778.575	M779T525	778.575	778.576	8.7236	8.8127	5.45164e+06	http://metlin.scripps.edu/metabo_list.php?mass_min=777.56467&mass_max=777.56934	4.59177	6.46308	7.63539	7.15644	12.3519	9.49304	6.33513	2.72413	2.84818	2.57922	2.01021	0.475315	0.290293	1.82812
PC(O-38:0)		802.668	8.7695		4.91502	0.00460627	2.86049	0.844186	0.998421	1	0.513866	0.797345	1	2.61935	0.0225691	1	0.575604	0.876711	1	0.523915	0.442282	0.269222	1.37232	0.301568	0.595285	Positive_normalized on PC	C46H92O7P1N1	802.668	M803T526	802.667	802.668	8.7439	8.8152	991755	http://metlin.scripps.edu/metabo_list.php?mass_min=801.65773&mass_max=801.66255	0.991692	0.488707	0.508655	0.495436	0.252367	0.34436	0.58619	0.60494	0.342695	0.37921	0.387066	0.0557363	0.329718	0.770774
PC(O-38:1)		800.653	8.7609		1.94966	0.133376	82.8264	0.518345	0.493465	1	0.518538	0.274895	1	1.01196	0.999998	1	0.423582	0.173502	1	0.575442	0.298277	0.298389	0.582322	0.243747	-0.827135	Positive_normalized on PC	C46H90O7P1N1	800.653	M801T526	800.652	800.654	8.7082	8.8148	708917	http://metlin.scripps.edu/metabo_list.php?mass_min=799.64323&mass_max=799.64803	0.346265	0.953324	0.330885	0.585881	0.491147	1.00069	0.319902	0.394284	0.309373	0.191175	0.310028	0.0720657	0.185424	0.979866
PC(O-38:2)		798.637	8.7439		0.542897	0.705714	438.248	0.653851	0.940386	1	1.10647	0.99798	1	0.642	0.853686	1	1.21651	0.975117	1	2.93086	1.91635	3.24291	1.88161	3.56542	-0.2408	Positive_normalized on PC	C46H88O7P1N1	798.637	M799T525	798.637	798.638	8.7228	8.8152	4.88711e+06	http://metlin.scripps.edu/metabo_list.php?mass_min=797.62711&mass_max=797.6319	1.06302	3.91538	2.02351	2.5653	3.33722	4.95999	2.65161	1.89	2.02528	1.83376	4.00399	9.66468	0.515204	4.78178
PC(O-38:3)		796.621	8.7082		10.0885	5.29383e-05	0.0328747	0.435615	0.00403379	1	0.34362	4.40077e-05	0.0151924	0.621377	0.0133051	1	0.364574	9.97416e-05	0.049868	72.4572	31.5635	24.8978	45.0232	26.416	0.135101	Positive_normalized on PC	C46H86O7P1N1	796.621	M797T522_2	796.62	796.622	8.6858	8.956	6.68337e+07	http://metlin.scripps.edu/metabo_list.php?mass_min=795.61117&mass_max=795.61595	40.9101	95.3239	60.7441	60.7085	94.1085	97.3273	58.0779	41.6423	17.7012	35.3469	53.628	9.65077	10.2125	42.583
PC(O-38:4)		794.606	8.6921		16.4792	9.86072e-07	0.00061235	0.37358	0.000643595	0.400844	0.212978	2.04634e-07	0.000302841	0.583088	0.00324418	1	0.24753	2.22115e-06	0.00165779	366.602	136.955	78.078	213.761	90.7448	0.210872	Positive_normalized on PC	C46H84O7P1N1	794.606	M795T522	794.605	794.606	8.6679	8.7429	2.91866e+08	http://metlin.scripps.edu/metabo_list.php?mass_min=793.59547&mass_max=793.60024	223.624	421.172	278.7	352.203	475.281	548.312	266.921	146.733	133.34	130.792	157.105	32.2096	35.9046	124.645
PC(O-38:5)		792.59	8.7241		15.6717	1.53035e-06	0.00095035	0.34883	0.000758281	0.498941	0.177496	4.06358e-07	0.000175789	0.522963	0.0013497	0.842651	0.239948	2.67116e-06	0.00261573	188.072	65.6054	33.3821	98.3549	45.1275	0.0851589	Positive_normalized on PC	C46H82O7P1N1	792.59	M793T523	792.59	792.59	8.704	8.7609	1.39874e+08	http://metlin.scripps.edu/metabo_list.php?mass_min=791.57993&mass_max=791.58468	95.9155	210.798	124.1	198.608	252.201	290.616	144.269	63.4076	72.0811	61.3275	52.2178	12.2284	12.932	55.8796
PC(O-38:6)		790.574	8.7438		14.5313	2.92539e-06	0.00181667	0.403934	0.00266994	1	0.183362	2.50226e-06	0.000369273	0.558898	0.00417292	1	0.233809	4.345e-06	0.00288259	34.1012	13.7746	6.25287	19.0591	7.97316	0.110593	Positive_normalized on PC	C46H80O7P1N1	790.575	M791T525	790.574	790.575	8.7219	8.7788	2.647e+07	http://metlin.scripps.edu/metabo_list.php?mass_min=789.56426&mass_max=789.569	17.3907	35.0039	20.8402	34.6654	36.5483	60.5045	33.7553	12.8573	14.5476	13.919	8.45029	1.77087	2.5427	11.3278
PC(O-39:4)		808.621	8.6724		0.581504	0.678826	421.551	0.385166	0.999914	1	6.12869	0.634337	1	5.84834	0.676874	1	2.62623	0.991159	1	8.07116	3.10874	49.4657	47.2029	21.1968	1.07297	Positive_normalized on PC	C47H86O7P1N1	808.621	M809T520	808.62	808.621	8.6347	8.7072	5.05025e+07	http://metlin.scripps.edu/metabo_list.php?mass_min=807.61037&mass_max=807.61522	2.31408	17.9086	5.00271	6.46707	10.7197	10.4148	3.67122	2.72577	3.27278	3.32767	4.84708	68.3819	0.859468	4.1573
PC(O-39:5)		806.605	8.6912		4.54598	0.00675373	4.19407	0.338159	0.997016	1	4.32084	0.298659	1	0.4529	0.996165	1	7.79252	0.00995513	1	12.2974	4.15846	53.1349	5.56947	95.8273	0.691242	Positive_normalized on PC	C47H84O7P1N1	806.606	M807T521	806.605	806.606	8.6679	8.7259	5.9889e+07	http://metlin.scripps.edu/metabo_list.php?mass_min=805.59504&mass_max=805.59988	4.00344	18.9981	9.26545	11.2944	17.0066	18.4546	7.05889	3.51376	4.93667	4.02494	4.4576	54.9893	63.7316	5.0485
PC(O-39:6)		804.59	8.7068		0.374396	0.824652	512.109	0.875135	0.998558	1	0.912421	0.999022	1	0.536923	0.705114	1	1.02142	0.999997	1	13.7974	12.0746	12.589	7.40813	14.0929	-0.0776841	Positive_normalized on PC	C47H82O7P1N1	804.59	M805T522	804.59	804.591	8.6858	8.7259	1.85196e+07	http://metlin.scripps.edu/metabo_list.php?mass_min=803.58001&mass_max=803.58484	52.2518	7.5478	4.63729	6.47078	8.53795	11.4993	5.63671	30.415	3.20565	2.60304	19.0905	6.25964	6.52465	20.6464
PC(O-40:0)		830.699	8.7439		4.8139	0.00511035	3.17352	1.29171	0.977945	1	0.967229	0.999988	1	2.68134	0.0101362	1	0.64793	0.913281	1	0.615759	0.795382	0.59558	1.65106	0.398969	1.02076	Positive_normalized on PC	C48H96O7P1N1	830.7	M831T525	830.698	830.7	8.6685	8.7788	1.35447e+06	http://metlin.scripps.edu/metabo_list.php?mass_min=829.68858&mass_max=829.69356	1.39787	0.307783	0.135273	0.657297	0.207345	0.537898	1.06685	0.63426	0.853395	0.898493	0.819929	0.249757	0.227142	0.542388
PC(O-40:1)		828.684	8.7421		1.07658	0.389099	241.63	0.798011	0.988948	1	1.0075	1	1	1.52339	0.570485	1	0.658462	0.864127	1	0.387073	0.308889	0.389977	0.589664	0.254873	-0.255972	Positive_normalized on PC	C48H94O7P1N1	828.684	M829T525	828.684	828.685	8.7062	8.7947	668766	http://metlin.scripps.edu/metabo_list.php?mass_min=827.674&mass_max=827.67897	0.322302	0.274134	0.523927	0.201549	0.135583	0.205559	1.04646	0.254128	0.222383	0.450156	0.73846	0.0524748	0.362097	1.05341
PC(O-40:2)		826.669	8.7082		0.558078	0.695098	431.656	0.826149	0.96579	1	0.816508	0.904779	1	0.842552	0.941816	1	0.587609	0.409951	1	1.15384	0.953245	0.942121	0.972171	0.678008	-0.111513	Positive_normalized on PC	C48H92O7P1N1	826.668	M827T522	826.668	826.669	8.6744	8.7609	1.60629e+06	http://metlin.scripps.edu/metabo_list.php?mass_min=825.65823&mass_max=825.66319	0.383523	1.35767	0.767999	1.54722	0.782786	1.41126	1.82643	0.995046	1.0646	0.800094	1.85335	0.108273	0.364982	2.44336
PC(O-40:3)		824.652	8.6743		4.59145	0.0064391	3.99868	0.814969	0.775341	1	0.559881	0.029804	1	0.980411	0.999823	1	0.472019	0.0106731	1	16.1852	13.1905	9.06181	15.8682	7.63973	0.348937	Positive_normalized on PC	C48H90O7P1N1	824.653	M825T520	824.652	824.653	8.6567	8.7251	2.07134e+07	http://metlin.scripps.edu/metabo_list.php?mass_min=823.64221&mass_max=823.64715	16.5949	25.0989	17.0815	11.5937	15.8318	16.0432	11.0525	14.136	12.2636	13.1718	19.2429	3.18815	4.47476	15.4466
PC(O-40:4)		822.637	8.6812		4.53902	0.00680331	4.22486	0.56525	0.171786	1	0.40865	0.00585416	1	0.566385	0.0534391	1	0.34302	0.00319113	1	48.8009	27.5847	19.9425	27.6401	16.7397	0.483431	Positive_normalized on PC	C48H88O7P1N1	822.637	M823T521	822.636	822.637	8.6567	8.7251	4.76864e+07	http://metlin.scripps.edu/metabo_list.php?mass_min=821.62645&mass_max=821.63139	23.0483	96.5206	44.7096	38.4962	56.4627	55.9078	26.461	28.0493	30.2709	24.4339	44.3164	7.59511	7.97792	37.8858
PC(O-40:5)		820.621	8.6735		9.50601	8.16505e-05	0.050705	0.41176	0.0135956	1	0.255251	6.17644e-05	0.0533457	0.458658	0.00313457	1	0.209991	6.47425e-05	0.0378581	112.587	46.3588	28.7379	51.639	23.6422	0.569841	Positive_normalized on PC	C48H86O7P1N1	820.621	M821T520_2	820.621	820.621	8.6524	8.7072	8.80108e+07	http://metlin.scripps.edu/metabo_list.php?mass_min=819.61074&mass_max=819.61566	41.9831	183.883	90.5607	104.594	147.789	154.455	64.8454	44.1767	52.964	41.9358	56.7803	10.2729	10.2985	62.2404
PC(O-40:6)		818.605	8.6706		12.4582	1.04163e-05	0.00646852	0.326075	0.00268211	1	0.173091	8.93723e-06	0.0045585	0.434827	0.00120325	0.739471	0.160437	6.94631e-06	0.00979175	125.193	40.8223	21.6698	54.4372	20.0856	0.534519	Positive_normalized on PC	C48H84O7P1N1	818.606	M819T520	818.605	818.606	8.65	8.6908	8.68345e+07	http://metlin.scripps.edu/metabo_list.php?mass_min=817.59513&mass_max=817.60004	48.8425	152.26	77.8393	130.35	171.627	213.278	82.1538	37.4448	47.0758	37.9462	37.3885	6.81132	7.50739	50.1979
PC(O-40:7)		816.589	8.6913		12.2815	1.16781e-05	0.00725209	0.372241	0.00482569	1	0.170237	2.84836e-06	0.00376824	0.478308	0.00240551	1	0.193407	2.43404e-05	0.0125596	26.0209	9.68604	4.42973	12.446	5.03264	1.11132	Positive_normalized on PC	C48H82O7P1N1	816.59	M817T521	816.587	816.59	8.6519	8.8323	1.92321e+07	http://metlin.scripps.edu/metabo_list.php?mass_min=815.57901&mass_max=815.58391	11.1126	32.7497	17.917	23.8646	27.8488	47.2738	21.3799	9.12477	9.9795	9.95384	7.37506	1.38376	1.55103	9.29954
PC(O-41:3)		838.668	8.6527		8.14326	0.000239054	0.148453	0.698343	0.61711	1	0.277291	0.00498651	1	1.16578	0.835389	1	0.25844	0.00575248	1	1.16644	0.814574	0.323443	1.35981	0.301454	0.688968	Positive_normalized on PC	C49H92O7P1N1	838.668	M839T519	838.667	838.668	8.604	8.6725	1.29821e+06	http://metlin.scripps.edu/metabo_list.php?mass_min=837.65752&mass_max=837.66255	1.459	1.64526	1.24585	0.910976	1.23573	0.991734	0.676519	0.949739	0.587113	0.90687	0.695254	0.0988543	0.142254	0.630031
PC(O-42:0)		858.731	8.7096		1.55829	0.216248	134.29	2.24956	0.641986	1	2.31121	0.383998	1	3.00359	0.090482	1	2.66791	0.221007	1	0.14875	0.334623	0.343793	0.446785	0.396853	-0.0721156	Positive_normalized on PC	C50H100O7P1N1	858.731	M859T523	858.729	858.731	8.6704	8.7611	572906	http://metlin.scripps.edu/metabo_list.php?mass_min=857.72071&mass_max=857.72586	0.149684	0.213625	0.0654999	0.0686851	0.114179	0.0812484	0.348332	0.435855	0.161904	0.40611	0.459865	0.0710695	0.108057	0.569334
PC(O-42:10)		838.574	8.6192		6.98308	0.000643187	0.399419	19.7915	0.0559465	1	24.643	0.00118968	0.68237	0.446297	0.999938	1	15.4436	0.0719779	1	1.08901	21.5531	26.8365	0.486022	16.8183	0.927088	Positive_normalized on PC	C50H80O7P1N1	838.575	M839T517	838.572	838.575	8.5859	8.7419	2.11779e+07	http://metlin.scripps.edu/metabo_list.php?mass_min=837.56342&mass_max=837.56845	0.423909	0.736393	0.737839	1.40263	1.3098	2.44775	0.564769	37.331	27.2104	0.117979	0.179225	10.8322	38.1201	25.8583
PC(O-42:2)		854.7	8.6743		0.234589	0.916215	568.97	0.832888	0.990735	1	0.887344	0.994514	1	1.17893	0.969974	1	0.899777	0.99699	1	0.720179	0.599829	0.639047	0.849038	0.648001	-0.131106	Positive_normalized on PC	C50H96O7P1N1	854.7	M855T520	854.7	854.7	8.6339	8.7769	1.14493e+06	http://metlin.scripps.edu/metabo_list.php?mass_min=853.68946&mass_max=853.69459	1.92326	0.650731	0.490761	0.363384	0.380361	0.442354	0.790403	0.713147	0.478333	0.608007	1.40743	0.182158	0.385678	1.61985
PC(O-42:3)		852.684	8.6385		8.3276	0.000205631	0.127697	0.849297	0.893564	1	0.477806	0.0136567	1	1.19621	0.594771	1	0.390185	0.00514089	1	9.74607	8.27731	4.65673	11.6584	3.80277	0.443165	Positive_normalized on PC	C50H94O7P1N1	852.684	M853T518	852.684	852.684	8.6142	8.6893	1.2399e+07	http://metlin.scripps.edu/metabo_list.php?mass_min=851.67333&mass_max=851.67844	13.7093	9.99468	11.1034	8.32652	8.52644	7.26833	9.29381	9.60639	6.91474	8.31079	9.37694	1.49852	3.44375	8.17648
PC(O-42:4)		850.668	8.6547		10.8308	3.11028e-05	0.0193148	0.725266	0.33481	1	0.444139	0.000961292	0.621717	1.01477	0.999891	1	0.328212	0.00016221	0.111389	11.191	8.11648	4.97038	11.3563	3.67304	0.526429	Positive_normalized on PC	C50H92O7P1N1	850.668	M851T519	850.668	850.668	8.6326	8.7072	1.28499e+07	http://metlin.scripps.edu/metabo_list.php?mass_min=849.65762&mass_max=849.66272	11.9273	14.8402	12.7787	9.9173	10.7574	8.36666	9.7496	8.1407	7.5969	8.61183	10.1364	1.71484	2.76049	9.47121
PC(O-42:5)		848.652	8.6527		8.15148	0.000237446	0.147454	0.639159	0.1555	1	0.455115	0.00169277	1	0.896897	0.870366	1	0.342962	0.000292882	0.223127	11.441	7.31258	5.20695	10.2614	3.92382	0.504037	Positive_normalized on PC	C50H90O7P1N1	848.653	M849T519	848.652	848.653	8.6326	8.6893	1.2705e+07	http://metlin.scripps.edu/metabo_list.php?mass_min=847.642&mass_max=847.64709	9.33906	16.1809	10.9246	10.7088	12.2154	11.1872	9.5307	7.21251	7.91899	6.80625	9.50077	1.8457	2.13885	12.3851
PC(O-42:6)		846.636	8.6528		2.58594	0.0614562	38.1643	0.651117	0.35282	1	0.578399	0.0682765	1	0.668007	0.192214	1	0.473588	0.022637	1	5.87764	3.82703	3.39962	3.9263	2.78358	0.776824	Positive_normalized on PC	C50H88O7P1N1	846.637	M847T519	846.636	846.637	8.6167	8.6893	6.68318e+06	http://metlin.scripps.edu/metabo_list.php?mass_min=845.62612&mass_max=845.6312	3.50254	8.73989	5.03117	5.08554	6.25966	8.35591	4.16875	3.61774	4.32826	3.53508	5.19798	0.79166	0.974151	8.35151
PC(O-42:7)		844.621	8.6547		6.57553	0.00092746	0.575953	0.528952	0.0813008	1	0.375406	0.00139599	0.866037	0.455057	0.00537389	1	0.275952	0.000545601	0.254452	2.47578	1.30957	0.929421	1.12662	0.683196	0.695725	Positive_normalized on PC	C50H86O7P1N1	844.621	M845T519	844.62	844.621	8.6167	8.7072	2.1578e+06	http://metlin.scripps.edu/metabo_list.php?mass_min=843.61055&mass_max=843.61561	2.22898	3.77228	2.19362	2.23813	2.71561	3.37112	0.810694	1.07584	1.68208	1.17079	1.65601	0.288727	0.236376	2.10536
PC(O-42:8)		842.604	8.6688		6.52074	0.000974996	0.605472	0.366289	0.054182	1	0.175509	0.000751744	0.446537	0.41524	0.0175867	1	0.128186	0.000609565	0.383185	2.1956	0.804225	0.385348	0.911701	0.281445	1.87224	Positive_normalized on PC	C50H84O7P1N1	842.606	M843T520	842.602	842.605	8.6158	8.726	1.51187e+06	http://metlin.scripps.edu/metabo_list.php?mass_min=841.59392&mass_max=841.59897	0.661475	5.05118	2.29521	1.32182	3.20345	1.77877	1.0573	0.594129	0.745184	1.07336	0.688331	0.161932	0.269877	0.797416
PC(O-42:9)		840.589	8.6112		2.74088	0.0510712	31.7152	0.245848	0.109152	1	0.206748	0.0187709	1	0.443318	0.13437	1	0.440867	0.155058	1	4.17358	1.02607	0.86288	1.85022	1.84	1.29373	Positive_normalized on PC	C50H82O7P1N1	840.59	M841T517	840.587	840.59	8.5689	8.7421	3.31644e+06	http://metlin.scripps.edu/metabo_list.php?mass_min=839.57876&mass_max=839.5838	1.58351	4.20189	3.16193	4.47962	6.01061	9.48914	0.288362	0.96957	1.16601	0.942624	2.21391	0.17462	0.0535647	1.81466
PC(O-43:3)		866.699	8.6178		0.73612	0.576098	357.757	0.827312	0.998035	1	0.387689	0.680513	1	1.15501	0.996531	1	1.31089	0.961229	1	0.635778	0.525986	0.246484	0.734327	0.833435	0.355307	Positive_normalized on PC	C51H96O7P1N1	866.7	M867T517	866.699	866.7	8.5622	8.6545	996015	http://metlin.scripps.edu/metabo_list.php?mass_min=865.68901&mass_max=865.69421	0.861523	0.515083	0.808543	0.493995	0.625027	0.444392	0.70188	0.691513	0.398739	0.487707	0.558601	0.0739812	0.178722	0.399733
PC(O-43:4)		864.683	8.6209		17.7982	4.96307e-07	0.000308207	0.630813	0.205986	1	0.214702	8.51052e-05	0.0548902	1.18701	0.56032	1	0.173152	0.000110291	0.043324	0.857897	0.541173	0.184192	1.01833	0.148547	0.969001	Positive_normalized on PC	C51H94O7P1N1	864.684	M865T517	864.683	864.684	8.5624	8.6534	879105	http://metlin.scripps.edu/metabo_list.php?mass_min=863.67283&mass_max=863.67802	1.2389	0.641547	0.771693	0.773531	0.846863	0.778229	0.95452	0.716765	0.387369	0.519384	0.267324	0.0916404	0.132164	0.511275
PC(O-43:5)		862.667	8.6191		18.2533	3.94939e-07	0.000245257	0.483774	0.0397739	1	0.167728	1.72849e-05	0.0127098	1.08774	0.939337	1	0.124354	1.73418e-05	0.00972962	0.612534	0.296328	0.102739	0.666277	0.0761712	1.36532	Positive_normalized on PC	C51H92O7P1N1	862.668	M863T517	862.667	862.668	8.5806	8.6534	570827	http://metlin.scripps.edu/metabo_list.php?mass_min=861.65685&mass_max=861.66203	0.575512	0.699202	0.488678	0.504974	0.762965	0.540142	0.716262	0.283614	0.392484	0.212886	0.146282	0.0646448	0.0259582	0.409786
PC(O-44:2)		882.731	8.6567		2.1207	0.10809	67.1237	3.71667	0.0854827	1	3.04084	0.0989991	1	2.08429	0.580766	1	1.69928	0.87338	1	0.17494	0.650194	0.531965	0.364626	0.297271	-0.0361695	Positive_normalized on PC	C52H100O7P1N1	882.731	M883T519	882.731	882.732	8.5993	8.7079	666580	http://metlin.scripps.edu/metabo_list.php?mass_min=881.7206&mass_max=881.7259	0.418592	0.220618	0.224749	0.0638639	0.0665907	0.118679	0.111486	0.804104	0.496267	0.650211	0.956715	0.072918	0.241224	1.3015
PC(O-44:3)		880.715	8.6197		1.55848	0.216196	134.258	1.09756	0.994116	1	1.09974	0.98347	1	1.30077	0.565768	1	0.685256	0.561179	1	1.45922	1.60158	1.60476	1.89812	0.999941	0.202118	Positive_normalized on PC	C52H98O7P1N1	880.715	M881T517_3	880.715	880.716	8.5964	8.6724	2.52804e+06	http://metlin.scripps.edu/metabo_list.php?mass_min=879.70475&mass_max=879.71003	1.86908	1.35928	1.89166	1.03895	1.19801	1.15503	1.70255	1.92196	1.28187	1.60091	2.83968	0.407985	0.887213	2.55034
PC(O-44:4)		878.699	8.6203		8.74953	0.00014661	0.0910446	0.783445	0.591057	1	0.602212	0.0295594	1	1.04642	0.992445	1	0.309556	0.000263033	0.215114	5.67071	4.44269	3.41497	5.93396	1.7554	0.430117	Positive_normalized on PC	C52H96O7P1N1	878.7	M879T517	878.699	878.7	8.5982	8.6534	6.89927e+06	http://metlin.scripps.edu/metabo_list.php?mass_min=877.68891&mass_max=877.69418	7.22895	5.05404	6.50726	4.56871	4.52394	4.80655	7.00553	4.90403	3.99008	4.43396	6.45737	0.914924	1.75937	5.40622
PC(O-44:5)		876.684	8.617		10.9861	2.79041e-05	0.0173284	0.66078	0.160389	1	0.496104	0.00214851	1	0.969422	0.997906	1	0.273117	4.36822e-05	0.0256777	5.75947	3.80574	2.8573	5.58336	1.57301	0.465253	Positive_normalized on PC	C52H94O7P1N1	876.684	M877T517	876.683	876.684	8.5804	8.6368	6.38842e+06	http://metlin.scripps.edu/metabo_list.php?mass_min=875.67323&mass_max=875.67849	6.35906	5.44946	5.39051	5.29418	5.56046	5.06663	7.19603	3.72761	3.82113	3.8685	5.80235	0.744725	1.36976	6.24756
PC(O-44:6)		874.668	8.6196		1.74945	0.17076	106.042	0.625563	0.459551	1	0.782795	0.694995	1	0.880797	0.946022	1	0.474228	0.0725705	1	2.17539	1.36084	1.70288	1.91607	1.03163	0.580581	Positive_normalized on PC	C52H92O7P1N1	874.668	M875T517	874.668	874.669	8.5793	8.6546	2.64984e+06	http://metlin.scripps.edu/metabo_list.php?mass_min=873.65749&mass_max=873.66273	1.95375	2.20654	2.19518	1.87963	2.08333	1.92677	2.98251	1.32249	1.44625	1.31379	2.11175	0.413439	0.477992	2.94025
PC(O-44:7)		872.652	8.6261		0.749402	0.567734	352.563	0.550809	0.984718	1	1.9771	0.640635	1	0.771471	0.996862	1	1.56557	0.928266	1	0.736474	0.405657	1.45609	0.568169	1.153	0.914169	Positive_normalized on PC	C52H90O7P1N1	872.653	M873T518_2	872.651	872.653	8.5513	8.6546	1.36321e+06	http://metlin.scripps.edu/metabo_list.php?mass_min=871.64155&mass_max=871.64679	0.693014	0.6615	0.591466	0.586415	0.628898	0.601284	1.39274	0.326094	0.496971	0.393906	0.60074	0.0503205	3.05529	0.71629
PC(O-44:8)		870.636	8.6166		2.1614	0.102834	63.8596	1.30855	0.974124	1	2.16821	0.102107	1	0.805252	0.987677	1	1.06484	0.999851	1	0.303588	0.39726	0.658242	0.244465	0.323272	1.07701	Positive_normalized on PC	C52H88O7P1N1	870.637	M871T517	870.635	870.637	8.5624	8.6553	668022	http://metlin.scripps.edu/metabo_list.php?mass_min=869.62576&mass_max=869.63099	0.153684	0.249786	0.530633	0.216885	0.123416	0.158842	0.691873	0.402423	0.365147	0.424211	1.37064	0.320413	0.507337	0.985574
PC(O-45:4)		892.715	8.5835		3.08073	0.0342319	21.258	0.183019	0.999435	1	9.04795	0.12734	1	0.528959	0.999824	1	10.217	0.082386	1	0.892117	0.163275	8.07183	0.471893	9.11479	0.569059	Positive_normalized on PC	C53H98O7P1N1	892.715	M893T515	892.715	892.715	8.5606	8.6166	6.7662e+06	http://metlin.scripps.edu/metabo_list.php?mass_min=891.70438&mass_max=891.70974	0.272101	0.164211	0.251313	2.015	2.21904	1.01329	0.309863	0.202261	0.12288	0.164683	0.151011	4.33625	0.0578465	13.9633
PC(O-45:5)		890.699	8.5855		7.84972	0.000304954	0.189376	0.68249	1	1	61.7952	0.00138021	0.834999	1.21396	1	1	53.0456	0.0083343	1	0.249844	0.170516	15.4392	0.3033	13.2531	0.996906	Positive_normalized on PC	C53H96O7P1N1	890.7	M891T515	890.698	890.7	8.5476	8.6191	1.01921e+07	http://metlin.scripps.edu/metabo_list.php?mass_min=889.68836&mass_max=889.6937	0.277552	0.182651	0.172819	0.289778	0.256628	0.243236	0.326244	0.190778	0.194972	0.125799	0.0948174	9.37752	26.9728	0.192736
PC(O-46:4)		906.731	8.5854		2.28302	0.0886426	55.047	1.16467	0.983626	1	1.09169	0.995228	1	1.5973	0.201405	1	0.641331	0.655637	1	0.560262	0.652521	0.611631	0.894907	0.359313	0.18536	Positive_normalized on PC	C54H100O7P1N1	906.731	M907T515	906.73	906.732	8.5417	8.619	1.03447e+06	http://metlin.scripps.edu/metabo_list.php?mass_min=905.72033&mass_max=905.72577	0.844684	0.423315	0.721587	0.273157	0.426593	0.503922	0.728575	0.705469	0.595375	0.656718	1.55613	0.113916	0.305064	1.01544
PC(O-46:5)		904.715	8.5859		8.40437	0.000193227	0.119994	0.840173	0.863786	1	0.636437	0.103326	1	1.09262	0.945257	1	0.228133	0.000396055	0.224347	1.22546	1.0296	0.77993	1.33897	0.279569	0.14149	Positive_normalized on PC	C54H98O7P1N1	904.715	M905T515	904.715	904.716	8.4875	8.6142	1.52919e+06	http://metlin.scripps.edu/metabo_list.php?mass_min=903.70473&mass_max=903.71015	1.26457	0.886333	1.49334	1.07979	1.0537	1.25684	1.54366	1.03228	1.10533	0.951191	1.61788	0.261576	0.39958	1.60693
PC(O-46:6)		902.699	8.5828		6.72009	0.000813603	0.505247	0.684447	0.41677	1	0.581063	0.0612045	1	0.959503	0.997697	1	0.220381	0.00043262	0.346367	1.22029	0.835223	0.709064	1.17087	0.268928	0.341137	Positive_normalized on PC	C54H96O7P1N1	902.7	M903T515	902.699	902.7	8.5624	8.6213	1.37822e+06	http://metlin.scripps.edu/metabo_list.php?mass_min=901.6889&mass_max=901.69432	1.28177	0.807959	1.15848	1.01999	1.1172	1.26836	1.88827	0.745742	0.938682	0.821245	1.49465	0.241308	0.256818	1.46947
PC(O-46:7)		900.684	8.5834		1.25674	0.313108	194.44	0.742549	0.999978	1	2.09493	0.983389	1	0.868383	0.999996	1	6.17598	0.220194	1	0.448946	0.333365	0.94051	0.389857	2.77268	0.586088	Positive_normalized on PC	C54H94O7P1N1	900.684	M901T515	900.683	900.684	8.5248	8.6188	1.85179e+06	http://metlin.scripps.edu/metabo_list.php?mass_min=899.67303&mass_max=899.67844	0.44751	0.335796	0.415205	0.199322	0.307406	0.359047	1.07834	0.314155	0.371993	0.313945	0.668634	0.0429234	4.8255	0.425053
PE(28:0)		636.46	7.9933		1	1	1	1	1	1	1	1	1	1	1	1	1	1	1	500	500	500	500	500	0.44247	Positive_normalized on PE	C33H66O8P1N1	636.46	M636T480	636.46	636.46	7.968	8.021	1.59436e+08	http://metlin.scripps.edu/metabo_list.php?mass_min=635.44989&mass_max=635.45371	500	500	500	500	500	500	500	500	500	500	500	500	500	500
PE(30:0)		664.491	7.9637		1.77139	0.166194	103.206	0.802194	0.707787	1	0.722781	0.222113	1	0.817996	0.575983	1	0.607775	0.0597735	1	14.7977	11.8706	10.6955	12.1044	8.99366	0.153113	Positive_normalized on PE	C35H70O8P1N1	664.491	M664T478	664.491	664.491	7.9324	7.9883	3.90181e+06	http://metlin.scripps.edu/metabo_list.php?mass_min=663.48129&mass_max=663.48528	13.4691	17.9432	10.4974	16.3613	19.4047	16.0982	9.80979	10.6876	14.7284	10.1958	17.6313	5.1019	6.3425	13.3094
PE(30:1)		662.475	7.9575		7.37338	0.000457194	0.283918	0.845051	0.551833	1	0.537515	0.00023334	0.100772	0.886382	0.597449	1	0.658264	0.00716086	1	7.33396	6.19757	3.94211	6.50069	4.82768	0.304431	Positive_normalized on PE	C35H68O8P1N1	662.476	M662T477	662.475	662.476	7.9381	8.0447	1.88096e+06	http://metlin.scripps.edu/metabo_list.php?mass_min=661.46554&mass_max=661.46951	6.42053	8.81135	6.21905	5.65208	9.55102	7.76773	6.91596	5.40353	8.03179	5.15738	4.33681	2.74366	3.62488	4.07843
PE(31:1)		676.491	7.9397		1.46938	0.241298	149.846	0.535915	0.943572	1	1.87743	0.445125	1	0.607772	0.924935	1	1.49421	0.864736	1	10.9483	5.86736	20.5547	6.65408	16.3591	0.253872	Positive_normalized on PE	C36H70O8P1N1	676.491	M676T476	676.491	676.491	7.9144	7.968	3.43865e+06	http://metlin.scripps.edu/metabo_list.php?mass_min=675.48118&mass_max=675.48524	6.89737	7.02636	5.5844	6.26863	8.03346	36.4783	6.34963	5.46924	7.3819	4.75096	3.6895	12.1223	4.19124	3.05103
PE(32:0)		692.522	7.948		1.51196	0.228966	142.188	0.803643	0.753288	1	0.90867	0.945604	1	0.989494	0.999987	1	0.649128	0.135826	1	58.1023	46.6935	52.7958	57.4918	37.7158	0.522539	Positive_normalized on PE	C37H74O8P1N1	692.522	M693T477	692.522	692.522	7.9155	7.968	1.65481e+07	http://metlin.scripps.edu/metabo_list.php?mass_min=691.51224&mass_max=691.5164	71.2423	58.5256	38.7264	65.0219	83.1064	52.8259	37.2674	55.1143	38.0941	46.8721	76.6594	21.4619	48.3384	59.7874
PE(32:1)		690.507	7.9306		10.3553	4.36185e-05	0.0270871	0.845229	0.535167	1	0.508273	5.6422e-05	0.0398444	0.955574	0.971964	1	0.611527	0.00168148	1	141.13	119.287	71.7327	134.86	86.305	0.422597	Positive_normalized on PE	C37H72O8P1N1	690.507	M691T476	690.506	690.507	7.8966	7.9519	3.54501e+07	http://metlin.scripps.edu/metabo_list.php?mass_min=689.49667&mass_max=689.50081	148.861	149.774	111.787	142.579	195.281	106.697	132.933	112.936	138.77	106.156	91.482	45.5557	81.6029	75.5982
PE(32:2)		688.491	7.9218		20.4586	1.37926e-07	8.56522e-05	0.91718	0.917273	1	0.300485	2.49239e-07	0.000967125	0.998473	1	1	0.503802	0.000206331	0.103055	15.8595	14.546	4.76554	15.8353	7.99005	0.234923	Positive_normalized on PE	C37H70O8P1N1	688.491	M688T475	688.491	688.491	7.8966	7.9504	3.79137e+06	http://metlin.scripps.edu/metabo_list.php?mass_min=687.48116&mass_max=687.48529	17.0011	18.0612	14.7015	13.0394	20.7545	9.57695	17.8819	13.0998	18.3921	12.1462	6.07276	3.62901	5.92207	4.97737
PE(32:3)		686.475	7.9217		12.959	7.57414e-06	0.00470354	1.16633	0.851713	1	0.359104	0.00209975	1	1.27388	0.297137	1	0.37014	0.0036169	1	1.53552	1.79092	0.551411	1.95606	0.568356	0.133549	Positive_normalized on PE	C37H68O8P1N1	686.476	M686T475	686.475	686.476	7.9026	7.9501	419676	http://metlin.scripps.edu/metabo_list.php?mass_min=685.46558&mass_max=685.4697	2.82157	1.62637	1.08457	0.7481	1.93008	1.40098	1.13695	1.70822	1.86264	1.8019	0.444754	0.171926	0.411868	0.551344
PE(33:1)		704.522	7.9217		5.48902	0.00259098	1.609	0.88203	0.606589	1	0.792717	0.0438956	1	1.12516	0.3359	1	0.867403	0.321245	1	64.4875	56.8799	51.1203	72.5585	55.9366	0.272341	Positive_normalized on PE	C38H74O8P1N1	704.522	M705T475	704.522	704.522	7.9026	7.9328	1.90741e+07	http://metlin.scripps.edu/metabo_list.php?mass_min=703.51238&mass_max=703.51661	75.4402	61.7563	56.76	62.7851	76.4432	55.4805	62.7469	57.1571	61.9498	51.5326	55.7814	31.6808	60.3554	46.2679
PE(33:2)		702.508	7.9117		1.5412	0.220855	137.151	0.0914314	0.943144	1	2.68158	0.461869	1	0.116269	0.882934	1	1.9905	0.854435	1	79.9244	7.3076	214.324	9.29276	159.09	-0.979626	Positive_normalized on PE	C38H72O8P1N1	702.507	M703T475	702.507	702.508	7.8791	7.9328	2.63489e+07	http://metlin.scripps.edu/metabo_list.php?mass_min=701.49761&mass_max=701.50182	9.43049	10.0786	7.30602	7.35997	10.028	505.836	9.431	6.72563	8.53486	6.6623	3.76923	162.222	5.64849	1.20259
PE(34:1)		718.538	7.9047		1.24859	0.316227	196.377	0.922611	0.968639	1	0.902687	0.850657	1	1.14457	0.602224	1	0.927528	0.947555	1	802.11	740.035	724.054	918.073	743.98	0.461958	Positive_normalized on PE	C39H76O8P1N1	718.538	M719T474	718.538	718.538	7.8721	7.9337	2.45475e+08	http://metlin.scripps.edu/metabo_list.php?mass_min=717.52784&mass_max=717.53215	1071.02	684.856	732.696	826.999	990.518	538.115	770.558	758.151	775.309	686.645	855.202	442.638	880.237	751.454
PE(34:2)		716.522	7.9016		4.65073	0.00605227	3.75846	0.863034	0.752595	1	0.642656	0.011711	1	1.08448	0.867182	1	0.856153	0.556037	1	196.432	169.528	126.238	213.027	168.176	0.281736	Positive_normalized on PE	C39H74O8P1N1	716.522	M717T474	716.522	716.522	7.8688	7.9218	5.49238e+07	http://metlin.scripps.edu/metabo_list.php?mass_min=715.51233&mass_max=715.51662	227.842	199.196	197.276	178.66	239.983	120.917	211.153	160.142	198.158	150.283	139.685	99.6539	154.573	126.626
PE(34:3)		714.507	7.8991		13.592	5.11977e-06	0.00317938	0.993211	0.999995	1	0.48976	9.89633e-05	0.0535533	1.11586	0.61681	1	0.643277	0.00731615	1	18.5241	18.3983	9.07236	20.6704	11.9161	0.0445148	Positive_normalized on PE	C39H72O8P1N1	714.507	M715T474	714.507	714.507	7.8609	7.9218	4.96533e+06	http://metlin.scripps.edu/metabo_list.php?mass_min=713.49686&mass_max=713.50115	23.8649	19.2152	18.1538	14.8345	22.1971	10.5413	20.862	17.2958	21.0242	16.8751	9.66482	6.84907	11.7439	8.27088
PE(34:4)		712.49	7.8904		13.6509	4.93957e-06	0.00306747	0.821706	0.575799	1	0.359199	1.75999e-05	0.00988429	1.06416	0.948245	1	0.564526	0.00386288	1	6.60973	5.43126	2.37421	7.03381	3.73137	1.06912	Positive_normalized on PE	C39H70O8P1N1	712.491	M712T473	712.489	712.491	7.7824	7.9337	1.6156e+06	http://metlin.scripps.edu/metabo_list.php?mass_min=711.48049&mass_max=711.48476	10.276	6.95974	5.01747	5.89141	8.31193	4.38303	5.42855	5.55898	6.37859	4.3562	2.60101	1.71173	3.26725	2.09747
PE(34:5)		710.475	7.8975		2.40521	0.0764169	47.4549	1.33792	0.995222	1	3.43922	0.0370748	1	1.47519	0.957941	1	2.5265	0.317197	1	2.25995	3.02364	7.77248	3.33385	5.70976	0.55129	Positive_normalized on PE	C39H68O8P1N1	710.476	M710T474	710.475	710.476	7.8498	7.914	1.4395e+06	http://metlin.scripps.edu/metabo_list.php?mass_min=709.4652&mass_max=709.46947	1.70109	1.29721	0.810179	1.52124	2.25782	7.30083	0.931293	0.405176	1.64464	7.0211	7.36492	4.34797	8.75166	6.11342
PE(35:1)		732.553	7.9038		0.95985	0.446661	277.376	1.04035	0.997793	1	1.1167	0.791712	1	1.24017	0.226607	1	1.07307	0.956172	1	120.546	125.411	134.614	149.498	129.355	0.548763	Positive_normalized on PE	C40H78O8P1N1	732.554	M733T474	732.553	732.553	7.8721	7.9224	4.11101e+07	http://metlin.scripps.edu/metabo_list.php?mass_min=731.54338&mass_max=731.54778	159.295	105.676	124.34	124.451	124.971	76.3595	128.732	129.074	126.729	120.43	162.907	90.2954	181.998	123.888
PE(35:3)		728.522	7.888		3.58867	0.0191347	11.8826	0.931273	0.974271	1	0.739628	0.102538	1	1.16326	0.444717	1	0.911769	0.88033	1	6.3081	5.87456	4.66565	7.33794	5.75153	0.359454	Positive_normalized on PE	C40H74O8P1N1	728.522	M729T473	728.522	728.522	7.8506	7.9155	1.86876e+06	http://metlin.scripps.edu/metabo_list.php?mass_min=727.51223&mass_max=727.5166	8.63477	5.53788	7.27843	5.91556	6.18982	3.93028	6.66996	5.85533	6.37229	5.39608	4.34832	3.58808	5.92929	4.37551
PE(36:1)		746.569	7.8858		1.33318	0.285221	177.123	1.22109	0.646837	1	1.1162	0.870292	1	1.31225	0.16058	1	1.03308	0.998759	1	712.602	870.153	795.403	935.115	736.173	0.846622	Positive_normalized on PE	C41H80O8P1N1	746.569	M747T473	746.569	746.569	7.8506	7.9039	2.49465e+08	http://metlin.scripps.edu/metabo_list.php?mass_min=745.55876&mass_max=745.56324	929.262	584.305	682.92	787.089	767.578	447.043	790.018	913.777	847.584	849.099	839.647	479.876	1193.75	744.444
PE(36:2)		744.553	7.8728		1.18022	0.343555	213.347	0.924358	0.985973	1	1.09907	0.914164	1	1.14441	0.7488	1	1.27775	0.252871	1	561.886	519.384	617.553	643.026	717.95	0.513056	Positive_normalized on PE	C41H78O8P1N1	744.554	M745T472	744.553	744.553	7.8327	7.8975	1.90271e+08	http://metlin.scripps.edu/metabo_list.php?mass_min=743.54336&mass_max=743.54783	658.526	511.359	594.615	575.439	522.791	452.887	617.586	505.648	589.088	463.416	660.933	515.441	708.468	637.745
PE(36:3)		742.538	7.8679		0.985566	0.433393	269.137	0.984822	0.999973	1	1.07722	0.961989	1	1.18994	0.539808	1	1.25085	0.332977	1	105.262	103.664	113.391	125.256	131.667	0.52783	Positive_normalized on PE	C41H76O8P1N1	742.538	M743T472	742.538	742.538	7.8327	7.8866	3.58368e+07	http://metlin.scripps.edu/metabo_list.php?mass_min=741.52771&mass_max=741.53217	145.151	90.2527	125.867	97.4573	101.802	58.5194	117.786	106.35	108.745	95.898	113.685	96.936	122.042	108.917
PE(36:4)		740.522	7.8502		1.80408	0.159616	99.1215	0.699513	0.41593	1	0.790612	0.50885	1	1.13645	0.813769	1	0.961849	0.998102	1	140.001	97.9326	110.686	159.104	134.66	0.853276	Positive_normalized on PE	C41H74O8P1N1	740.522	M741T471	740.522	740.522	7.8147	7.8687	4.00425e+07	http://metlin.scripps.edu/metabo_list.php?mass_min=739.51183&mass_max=739.51627	255.492	95.4029	115.991	150.15	170.647	72.88	119.444	104.328	95.9161	93.5537	118.078	74.582	157.151	90.3481
PE(36:5)		738.506	7.8389		10.7426	3.30947e-05	0.0205518	0.511233	0.0253088	1	0.346201	0.000129262	0.0736214	1.02463	0.999131	1	0.532982	0.00694393	1	47.0955	24.0768	16.3045	48.2554	25.1011	0.462834	Positive_normalized on PE	C41H72O8P1N1	738.507	M739T470	738.506	738.507	7.7964	7.8621	1.00516e+07	http://metlin.scripps.edu/metabo_list.php?mass_min=737.49648&mass_max=737.50091	70.9735	36.0282	37.8994	54.4899	65.5326	25.2135	39.5314	22.992	27.0096	22.2288	16.4653	11.4925	22.8854	13.9319
PE(36:6)		736.491	7.873		9.85607	6.28225e-05	0.0390128	0.577313	0.0479029	1	0.473157	0.00105309	0.599993	1.02272	0.99925	1	0.448189	0.000869324	0.516861	7.61998	4.39911	3.60545	7.7931	3.41519	0.464014	Positive_normalized on PE	C41H70O8P1N1	736.491	M736T472	736.49	736.491	7.8312	7.9088	1.68043e+06	http://metlin.scripps.edu/metabo_list.php?mass_min=735.48083&mass_max=735.48525	11.4214	5.76383	7.09767	7.77973	10.0969	5.31951	5.86079	3.64197	5.59318	3.96217	2.49882	6.96939	3.19994	2.5569
PE(37:1)		760.585	7.914		0.22343	0.922766	573.038	0.752911	0.847779	1	0.977362	0.999944	1	0.997306	1	1	1.03371	0.999767	1	33.9083	25.5299	33.1407	33.817	35.0512	0.555002	Positive_normalized on PE	C42H82O8P1N1	760.585	M761T475	760.585	760.585	7.8799	7.9575	1.00258e+07	http://metlin.scripps.edu/metabo_list.php?mass_min=759.57457&mass_max=759.57914	30.8436	23.1113	28.0125	23.28	90.8357	20.8185	20.4564	28.3121	24.2147	24.0629	33.1854	20.1862	37.2998	42.9645
PE(37:2)		758.569	7.8826		8.69838	0.000152676	0.094812	1.08844	0.988141	1	1.89153	0.000200995	0.125406	1.25096	0.476052	1	1.76439	0.00174399	1	18.159	19.765	34.3482	22.7162	32.0394	0.516844	Positive_normalized on PE	C42H80O8P1N1	758.569	M759T473	758.569	758.569	7.8609	7.9038	7.94479e+06	http://metlin.scripps.edu/metabo_list.php?mass_min=757.55897&mass_max=757.56352	21.5752	17.0598	18.3701	19.3374	16.4054	15.3269	19.038	21.0041	20.8938	17.3971	47.341	26.2658	33.6065	35.0803
PE(37:4)		754.538	7.8247		1.71952	0.177195	110.038	0.807113	0.786904	1	0.974877	0.999631	1	1.29268	0.257314	1	1.07362	0.980545	1	32.8488	26.5127	32.0235	42.463	35.2673	0.572448	Positive_normalized on PE	C42H76O8P1N1	754.538	M755T469	754.538	754.538	7.7785	7.8445	1.05733e+07	http://metlin.scripps.edu/metabo_list.php?mass_min=753.52764&mass_max=753.53217	58.497	26.4304	32.4793	33.1039	31.2688	20.1366	28.0255	29.544	23.5973	26.3968	31.91	24.3715	47.4777	20.7467
PE(37:5)		752.522	7.8208		12.8098	8.32129e-06	0.00516752	0.565424	0.0185627	1	0.441968	0.000124941	0.0664239	1.10287	0.772397	1	0.611508	0.00841757	1	14.6432	8.27963	6.47184	16.1496	8.95445	0.0556397	Positive_normalized on PE	C42H74O8P1N1	752.522	M753T469	752.521	752.523	7.7785	7.8973	3.46575e+06	http://metlin.scripps.edu/metabo_list.php?mass_min=751.51238&mass_max=751.5169	21.5386	12.4177	12.8452	16.4131	16.5736	10.5613	12.1531	8.17416	9.07438	7.59036	5.92378	6.37516	10.4072	3.43142
PE(38:2)		772.585	7.8517		20.744	1.21116e-07	7.52129e-05	1.07086	0.997416	1	2.64867	1.36489e-07	7.03025e-05	1.08573	0.986078	1	1.98484	0.000795689	0.477683	20.8789	22.3584	55.3013	22.6689	41.4412	0.675817	Positive_normalized on PE	C43H82O8P1N1	772.585	M773T471	772.584	772.585	7.8181	7.8798	1.00417e+07	http://metlin.scripps.edu/metabo_list.php?mass_min=771.57444&mass_max=771.57908	23.0465	17.6045	17.1728	25.5227	18.3674	20.0892	24.3492	23.9618	22.413	20.7005	65.365	33.6729	55.2596	56.6149
PE(38:3)		770.569	7.8263		0.804515	0.53391	331.558	1.35846	0.440029	1	1.28693	0.411248	1	1.24121	0.562048	1	1.20526	0.716357	1	114.024	154.897	146.742	141.528	137.428	1.01491	Positive_normalized on PE	C43H80O8P1N1	770.569	M771T470	770.568	770.569	7.7964	7.8621	4.17674e+07	http://metlin.scripps.edu/metabo_list.php?mass_min=769.55853&mass_max=769.56316	172.844	74.0634	92.0843	116.25	118.776	76.1637	147.989	169.727	144.582	150.383	127.197	83.4697	207.972	103.568
PE(38:4)		768.553	7.7749		2.33278	0.083436	51.8138	0.794294	0.750287	1	1.01474	0.999956	1	1.35875	0.124863	1	1.01866	0.999904	1	780.842	620.218	792.35	1060.97	795.413	1.00448	Positive_normalized on PE	C43H78O8P1N1	768.554	M769T466	768.553	768.553	7.724	7.8091	2.52673e+08	http://metlin.scripps.edu/metabo_list.php?mass_min=767.5429&mass_max=767.54751	1360.73	710.153	856.81	694.314	688.866	486.408	668.611	692.466	569.998	598.19	792.934	620.923	1162.15	463.417
PE(38:5)		766.537	7.7547		2.93974	0.0403707	25.0702	0.66588	0.173824	1	0.849852	0.619428	1	1.17465	0.492527	1	0.926113	0.954209	1	436.035	290.347	370.565	512.188	403.818	0.837446	Positive_normalized on PE	C43H76O8P1N1	766.538	M767T465	766.537	766.538	7.6987	7.8091	1.2723e+08	http://metlin.scripps.edu/metabo_list.php?mass_min=765.52739&mass_max=765.53199	662.664	374.82	425.185	435.26	443.111	349.327	361.878	290.101	308.42	272.52	379.825	352.965	431.447	278.024
PE(38:6)		764.522	7.7501		5.9887	0.00159986	0.993511	0.610455	0.212125	1	0.469511	0.00993378	1	1.09383	0.942245	1	0.542579	0.0368302	1	222.806	136.013	104.61	243.712	120.89	0.643369	Positive_normalized on PE	C43H74O8P1N1	764.522	M765T465	764.522	764.522	7.7238	7.7894	5.08565e+07	http://metlin.scripps.edu/metabo_list.php?mass_min=763.51189&mass_max=763.51648	396.981	152.103	162.16	262.132	281.76	132.225	172.28	127.486	154.66	125.892	92.6062	58.3093	119.18	107.626
PE(38:7)		762.506	7.7536		8.21528	0.000225347	0.13994	0.686638	0.278669	1	0.467495	0.00309881	1	1.13555	0.749746	1	0.551166	0.0175047	1	18.6443	12.8019	8.71613	21.1716	10.2761	0.999081	Positive_normalized on PE	C43H72O8P1N1	762.507	M763T465	762.505	762.507	7.6916	7.8183	4.46878e+06	http://metlin.scripps.edu/metabo_list.php?mass_min=761.49598&mass_max=761.50056	33.229	13.2384	16.3256	18.2064	22.3009	11.4527	15.7571	10.8105	15.5703	12.0249	7.13488	5.0648	10.8955	7.26009
PE(39:7)		776.523	7.6527		6.45716	0.00103346	0.641777	0.993644	1	1	0.466892	0.0250125	1	1.31243	0.28776	1	0.638523	0.207444	1	4.38883	4.36093	2.04911	5.76004	2.80237	-0.499831	Positive_normalized on PE	C44H74O8P1N1	776.522	M777T459	776.522	776.523	7.6194	7.7234	1.22735e+06	http://metlin.scripps.edu/metabo_list.php?mass_min=775.51274&mass_max=775.5174	7.03296	3.32044	2.77652	5.46938	2.91991	5.6905	3.51209	3.06852	5.82185	4.19243	2.71351	0.798917	2.04296	1.47455
PE(40:4)		796.584	7.6793		6.23618	0.00126781	0.787308	2.45855	0.0599298	1	3.09672	0.000317977	0.207511	1.57663	0.530066	1	1.9427	0.164551	1	70.2561	172.728	217.563	110.768	136.487	0.818652	Positive_normalized on PE	C45H82O8P1N1	796.585	M797T461	796.584	796.585	7.6448	7.7356	4.18928e+07	http://metlin.scripps.edu/metabo_list.php?mass_min=795.57425&mass_max=795.57902	141.122	75.2325	71.8082	57.0083	57.772	41.6327	47.2172	193.984	145.154	179.046	188.514	104.832	364.419	123.877
PE(40:5)		794.569	7.6673		2.44726	0.0726268	45.1012	1.7092	0.13573	1	1.6405	0.0662204	1	1.24428	0.76212	1	1.07673	0.995748	1	165.941	283.625	272.226	206.477	178.673	0.845819	Positive_normalized on PE	C45H80O8P1N1	794.569	M795T460	794.569	794.569	7.6262	7.7356	6.63193e+07	http://metlin.scripps.edu/metabo_list.php?mass_min=793.55857&mass_max=793.56334	289.901	147.563	149.935	171.664	168.153	109.167	125.203	315.078	266.718	269.079	251.92	147.521	393.091	186.853
PE(40:6)		792.553	7.6316		1.35667	0.277136	172.102	1.20204	0.84322	1	0.924974	0.98646	1	1.21101	0.664678	1	0.802953	0.739948	1	266.784	320.686	246.768	323.079	214.215	0.860507	Positive_normalized on PE	C45H78O8P1N1	792.554	M793T458	792.553	792.553	7.5911	7.6533	8.23771e+07	http://metlin.scripps.edu/metabo_list.php?mass_min=791.54292&mass_max=791.54768	454.117	201.659	198.671	313.97	268.17	207.989	222.912	326.386	321.333	314.339	179.691	131.417	342.21	212.204
PE(40:7)		790.537	7.6002		1.10438	0.376378	233.731	0.775792	0.671632	1	0.862905	0.81826	1	1.11306	0.896345	1	0.860932	0.830668	1	235.341	182.576	203.077	261.948	202.613	1.06501	Positive_normalized on PE	C45H76O8P1N1	790.538	M791T456	790.537	790.537	7.5738	7.634	6.64342e+07	http://metlin.scripps.edu/metabo_list.php?mass_min=789.52712&mass_max=789.53186	398.739	176.325	204.822	233.749	217.515	233.943	182.296	180.955	195.917	170.855	168.364	134.064	261.996	162.486
PE(42:1)		830.663	7.7188		3.5891	0.0191254	11.8769	1.17464	0.986888	1	2.15151	0.0105777	1	1.95381	0.0396418	1	1.78241	0.132381	1	4.31806	5.07219	9.29035	8.43667	7.69656	0.472449	Positive_normalized on PE	C47H92O8P1N1	830.663	M831T463	830.663	830.663	7.6627	7.7894	2.18203e+06	http://metlin.scripps.edu/metabo_list.php?mass_min=829.65264&mass_max=829.65763	5.30993	2.52652	4.22845	5.49271	5.01761	2.90765	4.74359	5.73131	4.94355	4.5417	9.12493	5.6652	16.3147	9.80286
PE(42:10)		812.521	7.4543		0.630543	0.645281	400.719	0.365903	0.413066	1	0.923321	0.998141	1	0.962143	0.999884	1	0.828008	0.967407	1	17.7538	6.49617	16.3924	17.0817	14.7003	2.14378	Positive_normalized on PE	C47H74O8P1N1	812.522	M813T447_1	812.52	812.522	7.1704	7.6818	4.24699e+06	http://metlin.scripps.edu/metabo_list.php?mass_min=811.51051&mass_max=811.51538	54.5237	9.05117	18.3612	19.0203	5.21002	10.9921	7.118	9.4058	4.01108	6.07163	11.3812	13.7721	27.0205	5.72551
PE(42:11)		810.505	7.502		4.08321	0.011074	6.87696	0.652596	0.833921	1	0.374044	0.198758	1	1.5178	0.347074	1	0.436194	0.309292	1	2.35841	1.53909	0.88215	3.57961	1.02873	1.90227	Positive_normalized on PE	C47H72O8P1N1	810.507	M811T450	810.502	810.506	7.4202	7.7224	588896	http://metlin.scripps.edu/metabo_list.php?mass_min=809.49506&mass_max=809.49992	6.22271	0.979381	3.97494	0.50319	1.60282	0.983658	2.24221	1.99684	0.727858	1.89258	1.10096	0.451942	1.20697	0.176609
PE(42:5)		822.6	7.5922		9.13141	0.000108743	0.0675295	1.36994	0.874473	1	2.98517	8.3766e-05	0.0759098	1.16325	0.980792	1	2.16044	0.024928	1	14.6252	20.0356	43.6587	17.0128	31.5969	0.513238	Positive_normalized on PE	C47H84O8P1N1	822.601	M823T456	822.6	822.6	7.5554	7.6197	7.4962e+06	http://metlin.scripps.edu/metabo_list.php?mass_min=821.59004&mass_max=821.59498	22.5157	13.7456	13.6157	15.1672	12.3581	12.9583	12.0158	22.6674	18.3518	19.0876	44.0088	29.604	57.9686	25.961
PE(42:6)		820.585	7.5605		7.11395	0.000573066	0.355874	1.3607	0.90572	1	2.81707	0.000581759	0.351519	1.12432	0.994596	1	2.23354	0.0260457	1	14.6371	19.9168	41.2339	16.4568	32.6926	0.563167	Positive_normalized on PE	C47H82O8P1N1	820.585	M821T454	820.585	820.585	7.5257	7.5856	7.36438e+06	http://metlin.scripps.edu/metabo_list.php?mass_min=819.57436&mass_max=819.57928	22.3207	13.0214	13.0796	13.9645	13.6287	13.2411	13.204	21.3573	19.422	18.971	44.5893	30.47	66.2832	31.0892
PE(42:7)		818.569	7.5272		5.96793	0.00163169	1.01328	1.3867	0.939715	1	3.1943	0.000672248	0.471805	1.29034	0.945628	1	2.12944	0.128904	1	17.0613	23.659	54.499	22.0149	36.3311	0.698856	Positive_normalized on PE	C47H80O8P1N1	818.569	M819T452	818.567	818.569	7.4842	7.7554	8.85742e+06	http://metlin.scripps.edu/metabo_list.php?mass_min=817.5586&mass_max=817.56351	34.8718	14.275	15.6219	14.0574	13.5733	12.9747	14.0551	25.1216	22.4786	23.3768	40.0916	35.4204	103.167	33.5663
PE(42:8)		816.553	7.5088		3.43677	0.0227223	14.1105	1.93462	0.63382	1	3.22422	0.0062778	1	1.58707	0.777058	1	2.31902	0.175803	1	12.5845	24.3462	40.5751	19.9724	29.1836	1.0679	Positive_normalized on PE	C47H78O8P1N1	816.554	M817T451	816.551	816.553	7.4548	7.7284	7.19106e+06	http://metlin.scripps.edu/metabo_list.php?mass_min=815.54266&mass_max=815.54756	36.5542	10.5021	11.9789	4.58632	11.8344	4.76386	7.87146	31.7588	21.1788	20.1009	31.5355	28.8624	90.4315	17.0182
PE(42:9)		814.536	7.5657		0.633849	0.643048	399.333	1.04949	0.999871	1	1.45681	0.463049	1	1.25393	0.862397	1	1.05589	0.999509	1	23.1762	24.3232	33.7632	29.0612	24.4715	2.35954	Positive_normalized on PE	C47H76O8P1N1	814.538	M815T454	814.535	814.538	7.4559	7.7199	7.85884e+06	http://metlin.scripps.edu/metabo_list.php?mass_min=813.52597&mass_max=813.53085	47.0189	18.9531	19.3395	23.1929	24.628	7.47378	21.6268	29.4785	22.3894	21.1019	23.7495	22.7377	67.7106	11.3038
PE(44:1)		858.694	7.6171		8.78339	0.000142737	0.0886396	1.02283	0.999992	1	2.44178	0.000303702	0.171984	1.82627	0.0419646	1	2.42268	0.000577635	0.394016	2.29582	2.34823	5.60589	4.19278	5.56204	0.34072	Positive_normalized on PE	C49H96O8P1N1	858.695	M859T457	858.694	858.694	7.5834	7.6506	1.27211e+06	http://metlin.scripps.edu/metabo_list.php?mass_min=857.68396&mass_max=857.68912	2.72642	2.37066	2.38193	2.56975	2.70229	1.58864	1.73108	2.90424	2.00758	2.13286	6.07616	4.18501	8.19886	6.25441
PE(44:10)		840.553	7.4025		7.68869	0.000349206	0.216857	0.944889	0.999989	1	4.11591	0.000388827	0.269419	1.19244	0.995877	1	2.75545	0.0658352	1	7.32145	6.91796	30.1345	8.73042	20.1739	0.632914	Positive_normalized on PE	C49H78O8P1N1	840.554	M841T444	840.553	840.553	7.3785	7.4367	4.21096e+06	http://metlin.scripps.edu/metabo_list.php?mass_min=839.54293&mass_max=839.54797	17.8646	6.61503	8.06269	3.17319	5.14047	4.80879	5.58541	8.70114	5.01814	7.03459	28.4777	21.332	51.5758	17.5386
PE(44:11)		838.537	7.4012		5.36663	0.00292342	1.81544	0.908956	0.99979	1	3.12762	0.00188555	1	1.23055	0.980046	1	1.55237	0.730339	1	6.25317	5.68385	19.5576	7.69486	9.70722	0.813242	Positive_normalized on PE	C49H76O8P1N1	838.538	M839T444	838.537	838.538	7.3679	7.4205	2.8567e+06	http://metlin.scripps.edu/metabo_list.php?mass_min=837.52713&mass_max=837.53216	19.6894	3.87424	6.84315	1.94641	3.34372	3.15024	4.925	6.78068	3.78097	6.48991	17.2726	13.5613	28.4254	11.6755
PE(44:2)		856.679	7.6194		16.6374	9.06342e-07	0.000562838	6.842	0.132796	1	15.6519	7.36059e-07	0.000298192	6.13854	0.073801	1	14.8275	5.02329e-06	0.00229255	0.585928	4.00892	9.17091	3.59674	8.68785	0.504868	Positive_normalized on PE	C49H94O8P1N1	856.679	M857T457	856.678	856.679	7.5911	7.6638	1.61429e+06	http://metlin.scripps.edu/metabo_list.php?mass_min=855.66818&mass_max=855.67332	0.482815	0.237039	0.565655	0.814603	0.545147	0.432037	1.0242	4.4462	3.83243	3.74813	11.8269	6.88642	12.8284	9.79201
PE(44:8)		844.585	7.4366		5.81316	0.00189148	1.17461	1.09892	0.999952	1	4.41047	0.00141896	0.912478	1.22918	0.996405	1	2.8144	0.149374	1	6.5017	7.14482	28.6756	7.99176	18.2984	0.452442	Positive_normalized on PE	C49H82O8P1N1	844.585	M845T446	844.585	844.585	7.4139	7.4721	3.97033e+06	http://metlin.scripps.edu/metabo_list.php?mass_min=843.57436&mass_max=843.57943	12.2645	6.40366	6.47082	3.65263	5.91261	5.13921	5.66841	9.13355	4.46781	7.8331	27.1923	21.1531	49.6242	9.05957
PE(44:9)		842.569	7.4281		5.63522	0.00224614	1.39485	0.971706	0.999998	1	3.0953	0.00306989	1	1.19096	0.991408	1	2.53893	0.0446362	1	10.9846	10.6738	34.0006	13.0823	27.8891	0.548396	Positive_normalized on PE	C49H80O8P1N1	842.569	M843T446	842.567	842.569	7.3962	7.7284	5.66611e+06	http://metlin.scripps.edu/metabo_list.php?mass_min=841.55864&mass_max=841.5637	20.7569	11.78	12.2053	6.21162	10.0779	6.76643	9.09403	13.6508	7.38252	10.9881	35.2981	26.6081	55.4013	14.8272
PE(46:10)		868.585	7.384		5.77253	0.00196681	1.22139	1.55274	0.913197	1	3.01869	0.0149752	1	0.864128	0.998673	1	3.24705	0.0088293	1	3.09772	4.80996	9.35107	2.67683	10.0585	0.58961	Positive_normalized on PE	C51H82O8P1N1	868.585	M869T443	868.584	868.585	7.3612	7.4719	1.68583e+06	http://metlin.scripps.edu/metabo_list.php?mass_min=867.57417&mass_max=867.57938	5.25946	2.37377	2.1584	1.0345	2.82715	3.79759	4.23318	5.52433	4.39391	4.51165	9.47611	7.00225	14.2227	6.79542
PE(46:11)		866.568	7.3847		1.76002	0.168545	104.666	0.996322	1	1	1.54528	0.520706	1	0.693293	0.882762	1	1.65368	0.397206	1	3.46082	3.44809	5.34794	2.39936	5.72307	1.35253	Positive_normalized on PE	C51H80O8P1N1	866.569	M867T443	866.567	866.569	7.3612	7.4205	1.15029e+06	http://metlin.scripps.edu/metabo_list.php?mass_min=865.55786&mass_max=865.56306	7.05635	3.21972	2.71218	2.60472	5.10804	1.38879	2.13594	3.45986	3.91028	2.97412	6.68089	3.01529	6.32289	3.90204
PE(46:4)		880.679	7.4321		8.01685	0.000265332	0.164771	8.13994	0.36034	1	17.9017	0.000210153	0.140869	12.3388	0.0126642	1	18.4494	0.000242533	0.154088	0.390641	3.1798	6.99313	4.82003	7.20709	0.298077	Positive_normalized on PE	C51H94O8P1N1	880.679	M881T446	880.679	880.679	7.4202	7.4897	1.38264e+06	http://metlin.scripps.edu/metabo_list.php?mass_min=879.66828&mass_max=879.67356	1.39931	0.136578	0.190367	0.252425	0.317772	0	0.43804	3.77751	2.92706	2.83483	6.6248	5.70246	15.0559	4.56956
PE(46:5)		878.663	7.4365		10.2437	4.72814e-05	0.0293618	4.09665	0.257238	1	8.25085	6.50883e-05	0.0246863	3.41511	0.252103	1	7.97457	0.000123087	0.090079	1.75755	7.20008	14.5013	6.00224	14.0157	0.378354	Positive_normalized on PE	C51H92O8P1N1	878.663	M879T446	878.663	878.663	7.4024	7.4565	2.63373e+06	http://metlin.scripps.edu/metabo_list.php?mass_min=877.65256&mass_max=877.65783	3.19053	1.12129	0.530922	1.61935	2.34293	0.71891	2.77894	8.73451	6.00366	6.86206	14.6537	10.7948	27.4028	11.2802
PE(46:6)		876.647	7.4204		4.74235	0.00550249	3.41705	2.2478	0.176737	1	2.84448	0.00288631	1	1.73532	0.390909	1	2.70796	0.00855033	1	3.65265	8.21044	10.3899	6.3385	9.89122	0.356337	Positive_normalized on PE	C51H90O8P1N1	876.648	M877T445	876.647	876.648	7.4014	7.4544	2.27143e+06	http://metlin.scripps.edu/metabo_list.php?mass_min=875.63694&mass_max=875.6422	6.03758	1.9784	1.85784	4.16435	5.84257	1.71905	3.96877	8.80262	7.84231	7.98639	11.281	6.69264	17.6541	7.89478
PE(46:8)		872.616	7.4188		5.17086	0.00355389	2.20697	1.88628	0.921632	1	5.02278	0.00304305	1	1.17207	0.999537	1	3.6478	0.0802868	1	2.29602	4.33093	11.5324	2.69109	8.37541	0.403676	Positive_normalized on PE	C51H86O8P1N1	872.616	M873T445	872.615	872.616	7.3858	7.628	1.65939e+06	http://metlin.scripps.edu/metabo_list.php?mass_min=871.60561&mass_max=871.61085	3.18201	1.50179	2.19646	1.82258	2.16169	2.09799	3.1096	5.53484	3.36552	4.09242	10.5925	8.8095	13.0036	4.47353
PE(46:9)		870.6	7.401		6.62492	0.000886748	0.550671	1.78219	0.881636	1	4.13829	0.00282897	1	0.948052	0.999989	1	3.78663	0.0113611	1	2.58916	4.61438	10.7147	2.45466	9.80417	0.553859	Positive_normalized on PE	C51H84O8P1N1	870.601	M871T444	870.6	870.6	7.3666	7.4205	1.67902e+06	http://metlin.scripps.edu/metabo_list.php?mass_min=869.58983&mass_max=869.59506	4.46724	2.43329	2.03874	0.916682	2.22978	2.08881	3.94956	5.60588	3.44388	4.79339	10.0113	8.45263	16.7715	5.06948
PE(48:10)		896.616	7.3658		2.94623	0.040064	24.8798	3.14597	0.22538	1	3.10393	0.0879332	1	0.819019	0.998889	1	2.78193	0.204376	1	0.933427	2.93653	2.89729	0.764494	2.59673	0.894757	Positive_normalized on PE	C53H86O8P1N1	896.616	M897T442	896.615	896.616	7.332	7.4026	537108	http://metlin.scripps.edu/metabo_list.php?mass_min=895.60509&mass_max=895.61047	1.43019	0.725274	0.727261	0.601722	0.961529	0.468716	1.61929	3.06705	2.6573	3.08524	1.80254	1.45598	4.03243	1.74642
PE(48:11)		894.6	7.3635		4.6528	0.00603923	3.75036	7.6886	0.244782	1	9.27428	0.026813	1	0.759878	0.999966	1	9.94976	0.0208552	1	0.217068	1.66895	2.01315	0.164945	2.15977	1.29912	Positive_normalized on PE	C53H84O8P1N1	894.601	M895T442	894.598	894.6	7.3261	7.3835	323159	http://metlin.scripps.edu/metabo_list.php?mass_min=893.58909&mass_max=893.59445	0.311679	0.264166	0.241776	0.148625	0.16398	0.114018	0.275232	1.5479	1.5421	1.91685	1.42805	1.40145	3.72036	1.41819
PE(48:12)		892.583	7.3492		4.67753	0.00588559	3.65495	2.23604	0.981626	1	5.79949	0.138302	1	0.993166	1	1	9.40204	0.00525357	1	0.198671	0.444238	1.15219	0.197314	1.86791	2.26547	Positive_normalized on PE	C53H82O8P1N1	892.585	M893T441	892.582	892.584	7.3127	7.3834	195015	http://metlin.scripps.edu/metabo_list.php?mass_min=891.57258&mass_max=891.57794	0.0494396	0.103497	0.200524	0.213577	0.22968	0.261765	0.332216	0.281946	0.503364	0.547403	0.76152	1.06191	1.78543	0.992192
PE(48:6)		904.679	7.3846		6.64325	0.000872129	0.541592	14.5487	0.00917186	1	13.9624	0.0013158	0.813908	6.43959	0.277666	1	14.0565	0.00179372	1	0.315202	4.5858	4.40098	2.02977	4.43063	0.334384	Positive_normalized on PE	C53H94O8P1N1	904.679	M905T443	904.678	904.679	7.3666	7.419	918662	http://metlin.scripps.edu/metabo_list.php?mass_min=903.66816&mass_max=903.67359	0.341989	0.151903	0.0914599	0.199557	0.685477	0.161264	0.574766	5.12555	4.19694	4.4349	4.12437	2.26138	7.84552	4.07404
PE(48:7)		902.663	7.3704		5.49502	0.00257576	1.59955	3.75084	0.139551	1	4.41187	0.00815397	1	1.68145	0.908892	1	4.89999	0.003675	1	1.27794	4.79333	5.63809	2.14879	6.26188	0.634175	Positive_normalized on PE	C53H92O8P1N1	902.663	M903T442	902.662	902.663	7.36	7.4013	1.14982e+06	http://metlin.scripps.edu/metabo_list.php?mass_min=901.65225&mass_max=901.65767	1.98455	0.963334	1.13626	0.807281	2.21667	0.498436	1.33903	5.55123	4.60325	4.22551	5.05247	2.95476	8.67513	6.14663
PE(48:8)		900.647	7.386		4.10306	0.0108379	6.73031	18.0782	0.177546	1	22.9465	0.0101644	1	4.16186	0.972124	1	19.0654	0.0505579	1	0.16863	3.04854	3.86947	0.701816	3.21501	0.924204	Positive_normalized on PE	C53H90O8P1N1	900.648	M901T443	900.645	900.647	7.3505	7.5605	580180	http://metlin.scripps.edu/metabo_list.php?mass_min=899.63635&mass_max=899.64175	0.297599	0.0513939	0.074803	0.140215	0.175594	0.0546959	0.386113	3.48014	2.56267	3.10282	0.16026	1.81822	6.42937	3.0588
PE(48:9)		898.631	7.3694		4.69211	0.00579699	3.59993	14.6182	0.148716	1	19.1191	0.00522615	1	2.44172	0.995816	1	13.4385	0.0858109	1	0.186963	2.73306	3.57456	0.456511	2.5125	1.09313	Positive_normalized on PE	C53H88O8P1N1	898.632	M899T442	898.63	898.632	7.3493	7.4188	499107	http://metlin.scripps.edu/metabo_list.php?mass_min=897.62055&mass_max=897.62594	0.384042	0.077548	0.129525	0	0.383264	0.054272	0.280087	3.31454	2.38873	2.49591	2.39842	1.95566	6.49156	1.89082
PE(O-29:0)		634.48	7.9577		6.27968	0.00121751	0.756076	3.37935	0.00708477	1	0.722708	0.962069	1	2.25478	0.0879	1	0.611614	0.899512	1	0.561312	1.89687	0.405665	1.26564	0.343307	0.294805	Positive_normalized on PE	C34H68O7P1N1	634.481	M634T477	634.48	634.481	7.9264	7.9857	273849	http://metlin.scripps.edu/metabo_list.php?mass_min=633.47073&mass_max=633.47454	2.02205	0.264389	0.359533	0.364706	0.29061	0.314062	0.313839	1.78717	1.81483	2.08861	0.327326	0.282395	0.362449	0.274691
PE(O-30:0)		648.496	7.9492		0.881164	0.489337	303.879	0.645688	0.999554	1	1.04939	1	1	0.943366	0.999999	1	3.6775	0.398785	1	2.97482	1.9208	3.12176	2.80634	10.9399	0.14975	Positive_normalized on PE	C35H70O7P1N1	648.496	M648T477	648.496	648.496	7.9144	7.9754	1.19546e+06	http://metlin.scripps.edu/metabo_list.php?mass_min=647.48642&mass_max=647.49031	3.28767	2.25147	2.04443	2.75121	3.42691	4.50474	2.55731	2.13896	1.68194	1.94151	3.64305	1.0608	1.45651	4.40495
PE(O-30:1)		646.48	7.94		0.89352	0.482428	299.588	1.32236	0.973211	1	1.05252	0.999934	1	1.87855	0.316087	1	1.16245	0.995276	1	0.949851	1.25604	0.999733	1.78434	1.10415	0.196523	Positive_normalized on PE	C35H68O7P1N1	646.481	M646T476	646.48	646.481	7.9038	7.9809	369480	http://metlin.scripps.edu/metabo_list.php?mass_min=645.47075&mass_max=645.47463	3.05797	0.746767	1.49815	0.19923	0.310066	0.43009	0.406685	1.21665	1.20083	1.35065	1.09954	0.242254	2.71139	0.627265
PE(O-31:0)		662.512	7.9323		1.16414	0.350289	217.529	1.46138	0.401046	1	1.05205	0.998505	1	1.33994	0.44521	1	1.35793	0.434867	1	3.3573	4.9063	3.53204	4.49859	4.55898	0.267431	Positive_normalized on PE	C36H72O7P1N1	662.512	M663T476	662.512	662.512	7.9144	7.9576	1.24117e+06	http://metlin.scripps.edu/metabo_list.php?mass_min=661.50195&mass_max=661.50592	4.30116	1.89806	5.99194	2.20661	3.36592	3.29169	2.44571	2.36807	7.62538	4.72546	3.14502	2.73757	3.65101	3.6224
PE(O-31:1)		660.496	7.9275		3.90486	0.0134587	8.35782	1.06817	0.999469	1	0.423137	0.236116	1	1.58158	0.230091	1	0.629364	0.640837	1	1.33891	1.43018	0.566542	2.11759	0.842661	0.0864685	Positive_normalized on PE	C36H70O7P1N1	660.496	M660T476	660.496	660.496	7.8936	7.9519	402785	http://metlin.scripps.edu/metabo_list.php?mass_min=659.48643&mass_max=659.49039	3.48999	0.975522	0.832653	0.735271	1.32978	1.11869	0.890456	1.44577	1.49285	1.35193	0.576212	0.287015	0.541181	0.39586
PE(O-32:0)		676.527	7.9255		1.29251	0.299753	186.146	0.631754	0.291341	1	1.1187	0.894681	1	0.962937	0.998412	1	0.970543	0.999448	1	30.9464	19.5505	34.6199	29.7994	30.0348	0.276766	Positive_normalized on PE	C37H74O7P1N1	676.528	M677T476	676.527	676.527	7.8966	7.9504	9.34158e+06	http://metlin.scripps.edu/metabo_list.php?mass_min=675.51755&mass_max=675.52161	34.4205	22.9943	23.0961	31.2471	41.3329	36.7552	26.7786	21.6557	18.2573	18.7385	34.4473	12.2907	22.1867	48.7491
PE(O-32:1)		674.512	7.911		6.28116	0.00121585	0.755041	0.493371	0.000951048	0.582899	0.683821	0.00716659	1	0.909472	0.738041	1	0.783135	0.103985	1	26.7098	13.1779	18.2648	24.2918	20.9174	0.17372	Positive_normalized on PE	C37H72O7P1N1	674.512	M675T475	674.512	674.512	7.8787	7.9337	6.52217e+06	http://metlin.scripps.edu/metabo_list.php?mass_min=673.50198&mass_max=673.50602	32.5977	19.8528	24.629	21.832	35.7986	27.1845	25.0743	13.9442	12.4705	13.1188	17.0261	8.83194	17.5337	20.4402
PE(O-32:3)		670.48	7.9001		6.38711	0.00110226	0.684501	0.698451	0.71913	1	0.278238	0.0154074	1	1.20092	0.808775	1	0.274078	0.019619	1	0.411652	0.287519	0.114537	0.494361	0.112825	0.905392	Positive_normalized on PE	C37H68O7P1N1	670.481	M670T474	670.48	670.48	7.868	7.9328	95689.9	http://metlin.scripps.edu/metabo_list.php?mass_min=669.4702&mass_max=669.47422	1.00064	0.254585	0.160034	0.222615	0.278191	0.62829	0.337202	0.301687	0.313175	0.247694	0.105109	0.0109104	0.125979	0.106335
PE(O-32:4)		668.465	7.89		5.55053	0.00243945	1.5149	3.48849	0.126387	1	0.901548	0.999897	1	3.90559	0.0111398	1	0.423352	0.930133	1	2.17931	7.60251	1.96475	8.51149	0.922615	-0.034431	Positive_normalized on PE	C37H66O7P1N1	668.465	M668T473	668.465	668.465	7.8485	7.9155	1.36278e+06	http://metlin.scripps.edu/metabo_list.php?mass_min=667.45519&mass_max=667.4592	12.4464	1.1023	0.60839	0.0641134	0.290208	0.199159	0.544633	7.53997	6.27149	8.99607	1.06266	1.31092	2.5655	0.575498
PE(O-32:5)		666.449	7.9025		5.86677	0.00179679	1.11581	2.58601	0.339396	1	0.209613	0.70478	1	3.20535	0.02738	1	0.125255	0.660393	1	0.286547	0.741012	0.0600639	0.918482	0.0358915	-0.0346311	Positive_normalized on PE	C37H64O7P1N1	666.449	M666T474	666.449	666.45	7.8682	7.9151	127040	http://metlin.scripps.edu/metabo_list.php?mass_min=665.43954&mass_max=665.44354	1.73995	0.0512719	0.0772371	0.0388272	0.0368431	0	0.0617	0.472844	0.696757	1.05344	0.0533262	0.055144	0.0384746	0.0223982
PE(O-33:1)		688.527	7.903		3.41177	0.0233782	14.5179	0.518356	0.0148492	1	0.781251	0.229622	1	1.00108	1	1	0.849799	0.580579	1	22.76	11.7978	17.7812	22.7846	19.3414	0.170277	Positive_normalized on PE	C38H74O7P1N1	688.528	M689T474	688.527	688.528	7.8688	7.9218	5.8678e+06	http://metlin.scripps.edu/metabo_list.php?mass_min=687.51759&mass_max=687.52172	28.6056	17.3548	18.7138	18.2326	31.0777	21.4195	23.9158	12.9024	10.5092	11.9817	17.5345	7.80229	16.9512	16.1123
PE(O-33:2)		686.512	7.8973		6.64806	0.000868333	0.539235	1.01205	0.999989	1	0.427505	0.00236937	1	0.940867	0.984877	1	0.496651	0.0108837	1	1.08279	1.09584	0.4629	1.01877	0.537772	0.374613	Positive_normalized on PE	C38H72O7P1N1	686.512	M687T474_1	686.511	686.512	7.8541	7.9218	262211	http://metlin.scripps.edu/metabo_list.php?mass_min=685.5018&mass_max=685.50591	1.26217	0.773331	0.899561	0.910669	1.24808	0.942407	1.54334	0.332488	1.72487	1.23017	0.408194	0.171885	0.400376	0.400164
PE(O-34:0)		704.559	7.9025		2.79009	0.048172	29.9148	0.554954	0.247221	1	1.34927	0.237353	1	1.15238	0.851351	1	1.12835	0.921909	1	26.6247	14.7755	35.9238	30.6818	30.0419	0.450449	Positive_normalized on PE	C39H78O7P1N1	704.559	M705T474	704.558	704.559	7.8506	7.9155	8.72142e+06	http://metlin.scripps.edu/metabo_list.php?mass_min=703.54864&mass_max=703.55286	32.0298	22.0189	31.4614	25.0858	29.8305	22.3691	23.5773	16.3485	14.0555	13.9225	37.7233	14.9683	22.1545	41.8436
PE(O-34:1)		702.543	7.8861		3.17743	0.0305967	19.0005	0.53015	0.0082858	1	0.779259	0.156528	1	0.883958	0.673566	1	0.81884	0.332411	1	524.134	277.87	408.436	463.312	429.181	0.337779	Positive_normalized on PE	C39H76O7P1N1	702.543	M703T473	702.543	702.543	7.8506	7.9151	1.30026e+08	http://metlin.scripps.edu/metabo_list.php?mass_min=701.53308&mass_max=701.53729	671.012	394.947	452.518	456.335	669.807	527.677	496.641	322.723	243.816	267.07	395.814	183.529	369.048	385.372
PE(O-34:2)		700.527	7.8847		6.12425	0.00140776	0.874221	0.556727	0.00178617	1	0.701278	0.0061472	1	0.930342	0.84053	1	0.795152	0.0957493	1	42.1492	23.4656	29.5583	39.2132	33.515	0.11026	Positive_normalized on PE	C39H74O7P1N1	700.528	M701T473	700.527	700.528	7.8506	7.9151	1.05507e+07	http://metlin.scripps.edu/metabo_list.php?mass_min=699.51759&mass_max=699.52179	46.7615	33.8143	39.8825	38.2038	52.7779	38.6296	44.9747	26.822	21.0474	22.5274	27.7724	15.1436	25.4067	31.4765
PE(O-34:3)		698.512	7.8768		14.6239	2.77198e-06	0.0017214	0.532558	0.00156651	1.01847	0.488027	1.48465e-05	0.0119928	0.954686	0.964975	1	0.533142	0.000190889	0.080411	3.85822	2.05472	1.88291	3.68339	2.05698	0.582919	Positive_normalized on PE	C39H72O7P1N1	698.512	M699T473	698.511	698.512	7.8442	7.9039	862349	http://metlin.scripps.edu/metabo_list.php?mass_min=697.50161&mass_max=697.5058	4.53745	3.05764	3.12634	3.53799	4.97899	3.99853	3.77057	2.31258	1.79121	2.06039	1.55195	0.791959	2.01379	2.00289
PE(O-34:4)		696.496	7.848		2.36285	0.0804443	49.9559	1.12131	0.992758	1	1.1699	0.939944	1	1.78309	0.0377291	1	1.08536	0.995685	1	3.65088	4.09377	4.27115	6.50983	3.96251	-0.104649	Positive_normalized on PE	C39H70O7P1N1	696.496	M696T471	696.496	696.497	7.7964	7.8798	1.39851e+06	http://metlin.scripps.edu/metabo_list.php?mass_min=695.48645&mass_max=695.49063	8.63463	2.5102	2.67376	3.05716	2.42323	2.84365	3.41354	4.75519	3.4129	4.11321	3.05296	2.87027	5.16961	2.43632
PE(O-34:5)		694.48	7.8557		3.90376	0.013475	8.36796	1.06133	0.999835	1	2.19103	0.0158074	1	0.85888	0.988721	1	1.50112	0.549269	1	1.47796	1.56859	3.23825	1.26939	2.21859	0.55732	Positive_normalized on PE	C39H68O7P1N1	694.481	M694T471	694.48	694.481	7.7954	7.8975	623651	http://metlin.scripps.edu/metabo_list.php?mass_min=693.47034&mass_max=693.47451	1.45262	3.2529	0.420375	0.288696	4.19195	0.388017	0.351141	1.63711	1.25933	1.80934	4.28495	1.70923	3.04228	3.3228
PE(O-34:6)		692.465	7.8501		5.68544	0.00213933	1.32852	0.376708	0.153527	1	1.22366	0.755652	1	0.23495	0.0110782	1	0.850983	0.933718	1	31.6566	11.9253	38.7368	7.43772	26.9392	0.024527	Positive_normalized on PE	C39H66O7P1N1	692.465	M692T471	692.465	692.465	7.8258	7.8681	7.73184e+06	http://metlin.scripps.edu/metabo_list.php?mass_min=691.45508&mass_max=691.45923	2.76527	41.0332	29.6827	46.0813	41.1374	30.4234	30.473	31.4889	2.05937	2.22756	54.3989	16.2296	36.2263	37.6231
PE(O-35:1)		716.559	7.8706		4.61217	0.00630096	3.91289	0.46312	0.00255102	1	0.687155	0.02522	1	0.797128	0.210684	1	0.69853	0.0409009	1	44.9807	20.8314	30.9087	35.8554	31.4203	0.261483	Positive_normalized on PE	C40H78O7P1N1	716.559	M717T472	716.559	716.559	7.8361	7.8975	1.01897e+07	http://metlin.scripps.edu/metabo_list.php?mass_min=715.54873&mass_max=715.55303	52.442	34.6316	38.2632	40.2096	54.5505	46.1331	48.6347	23.0355	19.137	20.3218	32.4951	13.1373	25.7818	30.0582
PE(O-35:2)		714.543	7.8614		6.83455	0.000734115	0.455886	0.422134	0.000302633	0.163767	0.668121	0.00564619	1	0.834596	0.263535	1	0.753488	0.060442	1	11.3037	4.77168	7.55225	9.43403	8.51721	-0.143722	Positive_normalized on PE	C40H76O7P1N1	714.543	M715T472	714.543	714.543	7.8147	7.8798	2.59725e+06	http://metlin.scripps.edu/metabo_list.php?mass_min=713.53338&mass_max=713.53767	12.0451	8.28444	10.2553	10.6371	12.4342	12.5509	12.919	5.049	4.55093	4.7151	7.14909	3.69178	6.48882	7.4115
PE(O-35:4)		710.512	7.8143		1.46141	0.243679	151.325	0.910228	0.984568	1	1.07895	0.975585	1	1.34407	0.17529	1	1.06686	0.988466	1	10.8755	9.89917	11.7341	14.6174	11.6026	0.10862	Positive_normalized on PE	C40H72O7P1N1	710.512	M711T469	710.512	710.512	7.764	7.8441	3.68089e+06	http://metlin.scripps.edu/metabo_list.php?mass_min=709.50191&mass_max=709.50617	18.7979	7.97823	9.8735	9.84429	9.19849	9.97523	10.4607	12.0055	7.66111	10.0309	10.8519	7.62261	13.6202	7.66895
PE(O-36:1)		730.574	7.8499		3.23075	0.0287687	17.8654	0.399388	0.00881362	1	0.877426	0.799709	1	0.717481	0.159828	1	0.848514	0.692504	1	67.3899	26.9147	59.1297	48.351	57.1813	0.448184	Positive_normalized on PE	C41H80O7P1N1	730.575	M731T471	730.574	730.574	7.8147	7.8798	1.57877e+07	http://metlin.scripps.edu/metabo_list.php?mass_min=729.5642&mass_max=729.56858	79.0136	49.5065	65.4587	60.4815	73.9475	66.9563	76.3652	30.1022	24.9616	25.6804	60.6085	29.3755	45.8572	55.4837
PE(O-36:2)		728.559	7.838		6.11415	0.00142119	0.882557	0.381183	0.00030231	0.137144	0.709076	0.0264653	1	0.735919	0.0484297	1	0.742981	0.0697022	1	127.905	48.7552	90.6944	94.1278	95.0311	0.366982	Positive_normalized on PE	C41H78O7P1N1	728.559	M729T470	728.558	728.559	7.7964	7.8609	2.84362e+07	http://metlin.scripps.edu/metabo_list.php?mass_min=727.54861&mass_max=727.55298	139.969	94.9699	109.36	131.325	130.636	149.13	139.945	54.4916	46.4359	45.338	91.459	43.3675	73.9635	85.2432
PE(O-36:3)		726.543	7.8251		2.43081	0.0740855	46.0071	0.550541	0.0325942	1	0.861423	0.649126	1	0.808057	0.372911	1	0.977279	0.999355	1	35.0841	19.3152	30.2223	28.35	34.287	0.381676	Positive_normalized on PE	C41H76O7P1N1	726.543	M727T470	726.543	726.543	7.7785	7.8508	9.2872e+06	http://metlin.scripps.edu/metabo_list.php?mass_min=725.53296&mass_max=725.53732	31.7391	25.6788	33.6987	35.8624	38.4711	46.4024	33.7363	22.1434	17.0291	18.7733	30.0291	17.7855	26.949	30.4047
PE(O-36:4)		724.527	7.742		1.63382	0.196988	122.33	0.693834	0.228925	1	0.869534	0.717258	1	1.05875	0.975622	1	1.02507	0.999168	1	750.291	520.577	652.403	794.369	769.102	0.258431	Positive_normalized on PE	C41H74O7P1N1	724.528	M725T465	724.527	724.527	7.6987	7.7894	2.18241e+08	http://metlin.scripps.edu/metabo_list.php?mass_min=723.5174&mass_max=723.52175	1120.32	515.46	734.904	737.346	759.702	731.199	653.106	629.03	411.643	521.06	637.044	451.352	736.647	484.682
PE(O-36:5)		722.512	7.7293		19.7921	1.87818e-07	0.000116635	0.365467	0.000495394	0.296935	0.181031	5.73492e-07	7.22233e-05	0.780053	0.167305	1	0.285779	3.10756e-06	0.0063366	157.034	57.3908	28.4281	122.495	44.877	0.120657	Positive_normalized on PE	C41H72O7P1N1	722.512	M723T464	722.512	722.512	7.6806	7.7894	2.63265e+07	http://metlin.scripps.edu/metabo_list.php?mass_min=721.50186&mass_max=721.5062	158.381	92.6249	119.314	215.481	224.677	160.055	128.706	54.4765	59.6496	58.0462	28.8279	16.2598	24.3607	33.9041
PE(O-36:6)		720.497	7.7329		1.48863	0.235646	146.336	5.17773	0.3464	1	0.407837	0.995384	1	3.58986	0.540399	1	0.476991	0.997547	1	3.69349	19.1239	1.50634	13.2591	1.76176	-0.392629	Positive_normalized on PE	C41H70O7P1N1	720.496	M720T464	720.496	720.497	7.6987	7.8194	2.77765e+06	http://metlin.scripps.edu/metabo_list.php?mass_min=719.48659&mass_max=719.49091	5.19298	2.51274	3.27143	2.53664	4.50923	3.7782	4.05321	1.49973	1.63963	54.2323	0.798265	0.826387	1.07449	1.67262
PE(O-37:3)		740.559	7.7894		0.302416	0.873556	542.478	0.797818	0.77839	1	0.992667	0.999998	1	1.03009	0.999338	1	0.971623	0.99955	1	5.17541	4.12904	5.13746	5.33114	5.02855	0.0639626	Positive_normalized on PE	C42H78O7P1N1	740.559	M741T467	740.559	740.559	7.7281	7.8357	1.58575e+06	http://metlin.scripps.edu/metabo_list.php?mass_min=739.5488&mass_max=739.55325	3.68214	4.35365	4.2988	5.15281	5.31559	6.9807	6.4442	5.0737	3.49894	3.81447	5.14306	3.56389	3.81423	4.96423
PE(O-37:4)		738.543	7.6703		1.63669	0.196292	121.897	0.754818	0.386233	1	0.861062	0.650754	1	1.10307	0.834786	1	0.928075	0.952537	1	130.773	98.7101	112.604	144.252	121.367	0.226533	Positive_normalized on PE	C42H76O7P1N1	738.543	M739T460	738.543	738.543	7.6448	7.7356	3.82204e+07	http://metlin.scripps.edu/metabo_list.php?mass_min=737.53303&mass_max=737.53747	191.686	98.6911	139.152	120.126	120.943	113.287	131.528	120.148	77.5204	98.4615	121.47	81.8746	121.614	73.668
PE(O-37:5)		736.528	7.6507		22.6266	5.30746e-08	3.29593e-05	0.531554	0.000584851	0.358051	0.401062	6.18466e-08	0.000119035	0.936649	0.860448	1	0.458654	8.03809e-06	0.00459193	40.7925	21.6834	16.3603	38.2083	18.7096	-0.0444789	Positive_normalized on PE	C42H74O7P1N1	736.528	M737T459	736.528	736.528	7.6087	7.7055	8.62081e+06	http://metlin.scripps.edu/metabo_list.php?mass_min=735.51759&mass_max=735.52201	48.3968	28.3382	35.9264	50.8219	48.04	37.8803	36.1441	22.8103	20.6654	21.5746	14.9249	10.8622	16.8345	14.1656
PE(O-37:6)		734.512	7.6544		9.40256	8.83182e-05	0.0548456	0.562057	0.0300428	1	0.508261	0.00141075	0.829212	1.09152	0.86695	1	0.603551	0.0131706	1	9.21929	5.18177	4.6858	10.0631	5.56431	-0.167218	Positive_normalized on PE	C42H72O7P1N1	734.512	M735T459	734.512	734.512	7.6101	7.7894	2.1792e+06	http://metlin.scripps.edu/metabo_list.php?mass_min=733.50204&mass_max=733.50644	10.8933	7.62457	6.24902	10.1025	11.7597	9.39069	8.51527	5.24912	5.39392	4.90226	3.75583	2.4073	4.21977	4.57364
PE(O-38:1)		758.605	7.8058		1.19175	0.3388	210.395	1.19754	0.987201	1	0.679771	0.848353	1	1.45211	0.638559	1	1.37697	0.787415	1	13.4009	16.0482	9.10956	19.4596	18.4527	0.497703	Positive_normalized on PE	C43H84O7P1N1	758.606	M759T468	758.605	758.606	7.7704	7.8426	4.49476e+06	http://metlin.scripps.edu/metabo_list.php?mass_min=757.59537&mass_max=757.59992	17.273	14.6092	15.0536	3.30521	13.7376	12.864	16.964	16.6812	17.3018	14.1615	3.80726	2.15234	2.9637	6.26714
PE(O-38:2)		756.59	7.7907		3.06279	0.0349549	21.707	1.24778	0.945069	1	1.1638	0.968081	1	2.00257	0.0200134	1	1.7197	0.148259	1	6.67761	8.33221	7.77141	13.3724	11.4835	0.525378	Positive_normalized on PE	C43H82O7P1N1	756.59	M757T467	756.59	756.59	7.7423	7.8328	2.99733e+06	http://metlin.scripps.edu/metabo_list.php?mass_min=755.5797&mass_max=755.58424	3.17859	8.80584	11.922	6.24297	5.06595	7.51575	4.01215	11.9161	1.69065	11.3899	7.71146	3.62578	4.78889	9.59657
PE(O-38:3)		754.574	7.6747		6.04631	0.00151498	0.940804	0.693955	0.410968	1	1.458	0.0289253	1	0.999905	1	1	1.45596	0.0381127	1	21.8886	15.1897	31.9136	21.8865	31.8689	0.486939	Positive_normalized on PE	C43H80O7P1N1	754.575	M755T460	754.574	754.574	7.6165	7.7894	7.70225e+06	http://metlin.scripps.edu/metabo_list.php?mass_min=753.56408&mass_max=753.56861	24.5171	21.4223	26.2713	18.4846	21.5388	25.5679	15.4183	16.9158	13.574	15.0794	32.2737	21.3071	29.4467	32.5687
PE(O-38:4)		752.558	7.616		1.50678	0.230433	143.099	0.86539	0.928051	1	1.1932	0.61675	1	1.12344	0.878375	1	1.32208	0.2219	1	616.688	533.675	735.832	692.809	815.311	0.767207	Positive_normalized on PE	C43H78O7P1N1	752.559	M753T457	752.558	752.558	7.5808	7.6354	2.10111e+08	http://metlin.scripps.edu/metabo_list.php?mass_min=751.54823&mass_max=751.55275	930.716	529.205	803.086	487.189	533.992	458.968	573.658	649.283	446.825	504.918	887.822	602.859	874.794	539.247
PE(O-38:5)		750.543	7.5959		2.87372	0.0436342	27.0968	0.741038	0.178332	1	0.827408	0.289051	1	1.092	0.784997	1	0.890794	0.702045	1	1146.74	849.775	948.819	1252.24	1021.51	0.58265	Positive_normalized on PE	C43H76O7P1N1	750.543	M751T456	750.543	750.543	7.5554	7.634	3.28354e+08	http://metlin.scripps.edu/metabo_list.php?mass_min=749.53273&mass_max=749.53723	1519	924.981	1112.83	1165.23	1232.13	1013.31	1059.66	981.759	746.2	821.366	963.909	656.442	1030.73	774.404
PE(O-38:6)		748.527	7.5836		7.15161	0.000554449	0.344313	0.523831	0.0253739	1	0.463143	0.000967642	0.563192	0.974843	0.998956	1	0.641629	0.0395096	1	737.887	386.528	341.747	719.325	473.45	0.330302	Positive_normalized on PE	C43H74O7P1N1	748.528	M749T455	748.527	748.527	7.5554	7.6174	1.69652e+08	http://metlin.scripps.edu/metabo_list.php?mass_min=747.51728&mass_max=747.52177	445.875	662.827	528.967	913.326	1160.78	815.481	637.959	366.816	433.835	358.934	310.712	216.163	303.389	421.177
PE(O-39:4)		766.574	7.5912		2.45878	0.0716226	44.4776	1.24396	0.560493	1	1.46296	0.0184456	1	1.3073	0.165091	1	1.29612	0.217205	1	26.1676	32.5516	38.2822	34.209	33.9163	0.688038	Positive_normalized on PE	C44H80O7P1N1	766.575	M767T455	766.574	766.574	7.5554	7.6161	1.03985e+07	http://metlin.scripps.edu/metabo_list.php?mass_min=765.56389&mass_max=765.56849	37.3105	32.8542	32.4153	20.6125	21.8077	19.0432	19.1298	37.0409	31.9419	28.6719	40.7288	28.443	38.7368	33.6096
PE(O-39:5)		764.558	7.5847		1.75034	0.170573	105.926	0.930244	0.96655	1	0.889286	0.710734	1	1.03536	0.99286	1	0.76672	0.150588	1	64.9498	60.4192	57.7589	67.2463	49.7983	0.572053	Positive_normalized on PE	C44H78O7P1N1	764.559	M765T455	764.558	764.559	7.5376	7.6354	1.88711e+07	http://metlin.scripps.edu/metabo_list.php?mass_min=763.54833&mass_max=763.55292	75.0423	71.8041	55.6757	61.9256	84.4656	51.8554	53.8799	65.9575	61.2662	54.0338	58.3679	33.76	52.0207	56.2719
PE(O-39:6)		762.543	7.5455		11.0586	2.65343e-05	0.0164778	0.549959	0.00631567	1	0.461516	5.13575e-05	0.0246115	0.920517	0.850337	1	0.567424	0.00107974	0.686933	136.119	74.8601	62.8213	125.3	77.2373	0.494797	Positive_normalized on PE	C44H76O7P1N1	762.543	M763T453	762.543	762.543	7.5198	7.5803	3.01424e+07	http://metlin.scripps.edu/metabo_list.php?mass_min=761.53275&mass_max=761.53732	140.136	129.785	94.0193	148.158	193.359	125.309	122.068	73.5013	80.3127	70.7663	59.6722	39.3909	56.0695	74.1797
PE(O-40:1)		786.637	7.7488		4.61759	0.00626534	3.89078	0.91398	0.999539	1	2.48463	0.00496486	1	1.30787	0.877177	1	1.03139	0.99998	1	1.24212	1.13527	3.0862	1.62453	1.28111	0.26402	Positive_normalized on PE	C45H88O7P1N1	786.637	M787T465	786.637	786.637	7.6736	7.8061	546449	http://metlin.scripps.edu/metabo_list.php?mass_min=785.62675&mass_max=785.63147	1.68569	0.660357	1.81328	1.02956	1.19919	1.45752	0.849222	0.118704	1.67883	1.60828	3.49227	2.16563	2.37069	5.39224
PE(O-40:3)		782.605	7.5396		1.41756	0.257183	159.71	1.05133	0.998538	1	1.16541	0.790594	1	1.41049	0.109977	1	1.22848	0.594339	1	15.1412	15.9184	17.6457	21.3566	18.6007	0.469662	Positive_normalized on PE	C45H84O7P1N1	782.606	M783T452	782.605	782.606	7.502	7.5868	5.75628e+06	http://metlin.scripps.edu/metabo_list.php?mass_min=781.5953&mass_max=781.59999	13.6279	19.5406	20.9606	12.2074	15.0391	11.8962	12.7169	8.21364	19.3042	20.2374	19.5626	12.6996	18.5862	16.9455
PE(O-40:4)		780.59	7.5431		6.58055	0.000923235	0.573329	1.232	0.717792	1	1.85207	0.000261254	0.136486	1.36072	0.16186	1	1.60088	0.0110838	1	104.782	129.091	194.063	142.578	167.743	0.816685	Positive_normalized on PE	C45H82O7P1N1	780.59	M781T453_2	780.589	780.59	7.502	7.5686	4.55722e+07	http://metlin.scripps.edu/metabo_list.php?mass_min=779.57939&mass_max=779.58407	166.152	129.194	140.92	65.558	93.906	59.3639	78.3776	156.496	115.052	115.725	219.242	144.47	191.386	163.581
PE(O-40:5)		778.574	7.5431		0.398001	0.808145	501.858	1.04021	0.998681	1	1.17875	0.584287	1	1.10154	0.903977	1	1.07652	0.967053	1	317.654	330.426	374.434	349.907	341.961	0.921469	Positive_normalized on PE	C45H80O7P1N1	778.575	M779T453	778.574	778.574	7.502	7.5637	1.05713e+08	http://metlin.scripps.edu/metabo_list.php?mass_min=777.56366&mass_max=777.56833	382.354	384.582	353.77	265.343	379.142	204.332	254.053	381.79	308.122	301.366	378.92	235.807	346.978	369.092
PE(O-40:6)		776.558	7.4947		3.14366	0.0318175	19.7587	0.636369	0.0956287	1	0.646816	0.0267743	1	0.932054	0.951792	1	0.753973	0.19531	1	848.854	540.184	549.053	791.178	640.014	0.807882	Positive_normalized on PE	C45H78O7P1N1	776.559	M777T450	776.558	776.558	7.4737	7.514	2.08329e+08	http://metlin.scripps.edu/metabo_list.php?mass_min=775.54811&mass_max=775.55277	925.732	831.671	728.668	825.858	1145.11	686.523	798.421	563.155	558.858	498.539	534.41	333.937	471.628	657.238
PE(O-40:7)		774.543	7.472		10.256	4.68629e-05	0.0291019	0.503763	0.00100708	0.697425	0.512116	4.45834e-05	0.0260844	0.873307	0.467123	1	0.641023	0.00325402	1	946.876	477.001	484.91	826.913	606.969	0.758259	Positive_normalized on PE	C45H76O7P1N1	774.543	M775T448	774.542	774.543	7.4486	7.4921	2.11476e+08	http://metlin.scripps.edu/metabo_list.php?mass_min=773.53251&mass_max=773.53716	1029.82	835.336	676.844	1039.61	1160.01	1016.28	870.227	488.291	489.291	453.42	466.42	306.755	456.831	577.705
PE(O-41:7)		788.558	7.4387		1.03451	0.409059	254.026	0.654187	0.205111	1	0.89245	0.866972	1	0.962914	0.99685	1	0.957824	0.995577	1	16.4376	10.7533	14.6698	15.828	15.7444	0.668775	Positive_normalized on PE	C46H78O7P1N1	788.559	M789T446	788.558	788.558	7.4139	7.4565	4.56931e+06	http://metlin.scripps.edu/metabo_list.php?mass_min=787.54817&mass_max=787.5529	18.2972	16.1026	11.1633	17.0437	20.0017	16.2878	16.1673	11.1879	11.1112	9.96079	13.8545	9.48701	12.1638	19.0326
PE(O-42:1)		814.668	7.6682		9.41017	8.78083e-05	0.054529	0.0972926	0.955894	1	7.6455	7.8261e-05	0.0480756	1.68348	0.959213	1	3.48482	0.226658	1	0.680071	0.0661659	5.19948	1.14489	2.36992	0.463767	Positive_normalized on PE	C47H92O7P1N1	814.668	M815T460	814.668	814.668	7.3971	7.7176	665944	http://metlin.scripps.edu/metabo_list.php?mass_min=813.6578&mass_max=813.66269	0.382631	0.542695	0.137008	0.823631	0.744126	1.3111	0.819311	0.0257201	0.0276363	0.145141	6.88003	2.68271	4.81573	10.7933
PE(O-42:2)		812.652	7.6098		11.5782	1.86014e-05	0.0115515	0.206224	0.864577	1	5.36122	3.3845e-05	0.0216977	1.04573	0.999992	1	1.71709	0.813223	1	1.19087	0.245585	6.3845	1.24533	2.04483	0.464838	Positive_normalized on PE	C47H90O7P1N1	812.653	M813T457	812.652	812.653	7.5753	7.6708	780897	http://metlin.scripps.edu/metabo_list.php?mass_min=811.64215&mass_max=811.64703	0.799931	1.15298	0.255733	1.41166	1.28883	2.04489	1.38204	0.295155	0.225857	0.215744	8.09883	1.96695	6.22122	11.8282
PE(O-42:3)		810.637	7.5297		7.55601	0.000390871	0.242731	1.03515	0.999901	1	2.10602	0.000552198	0.332323	0.983342	0.999986	1	1.62151	0.0789829	1	3.40477	3.52444	7.17049	3.34805	5.52087	0.465915	Positive_normalized on PE	C47H88O7P1N1	810.637	M811T452	810.637	810.637	7.4024	7.5804	1.421e+06	http://metlin.scripps.edu/metabo_list.php?mass_min=809.62651&mass_max=809.63137	6.20058	3.613	3.22749	2.51118	3.03613	2.45164	2.79334	5.58681	0.645035	4.34147	8.75709	3.63513	5.07994	8.76635
PE(O-42:4)		808.621	7.4683		9.54875	7.90561e-05	0.0490939	1.15029	0.960172	1	2.2633	1.72214e-05	0.0130837	1.52051	0.0869352	1	1.80139	0.00668327	1	15.917	18.3091	36.025	24.202	28.6728	0.553564	Positive_normalized on PE	C47H86O7P1N1	808.621	M809T448_2	808.621	808.621	7.4371	7.514	7.58626e+06	http://metlin.scripps.edu/metabo_list.php?mass_min=807.6108&mass_max=807.61565	28.1241	16.029	17.7224	10.5212	13.8595	9.23095	15.9319	22.03	16.048	16.8494	39.3735	24.4933	28.8047	31.9227
PE(O-42:5)		806.605	7.4725		4.32765	0.00851085	5.28524	1.05599	0.999068	1	1.7715	0.00743951	1	1.19433	0.812461	1	1.64045	0.0376871	1	30.9228	32.6541	54.7797	36.9321	50.7273	0.592061	Positive_normalized on PE	C47H84O7P1N1	806.606	M807T448	806.605	806.605	7.4381	7.5138	1.251e+07	http://metlin.scripps.edu/metabo_list.php?mass_min=805.59512&mass_max=805.59996	46.5843	33.9759	27.8991	25.1082	33.4463	17.0895	32.3564	36.9259	31.8971	29.1393	57.5477	32.2263	41.3824	62.3794
PE(O-42:6)		804.59	7.4388		1.27194	0.307367	190.875	0.872849	0.988783	1	1.24937	0.769065	1	1.11584	0.979683	1	1.51742	0.221189	1	45.3333	39.5691	56.638	50.5845	68.7894	0.568608	Positive_normalized on PE	C47H82O7P1N1	804.59	M805T446	804.59	804.59	7.4139	7.4719	1.58359e+07	http://metlin.scripps.edu/metabo_list.php?mass_min=803.57949&mass_max=803.58432	60.8616	46.2834	32.6015	40.8389	55.7611	35.4998	45.4866	43.5862	39.9366	35.1845	60.0619	31.9344	44.4726	88.6892
PE(O-42:7)		802.574	7.4366		1.08776	0.383939	238.426	0.880778	0.979803	1	1.24279	0.632135	1	1.07112	0.992291	1	1.34066	0.377203	1	30.2625	26.6546	37.61	32.4148	40.5718	1.01851	Positive_normalized on PE	C47H80O7P1N1	802.575	M803T446	802.572	802.574	7.4149	7.7246	1.03666e+07	http://metlin.scripps.edu/metabo_list.php?mass_min=801.5635&mass_max=801.56831	36.3482	28.1243	25.9743	28.2871	35.9336	28.7155	28.4545	29.676	26.8686	23.4191	37.8275	21.281	29.9217	58.3855
PE(O-44:1)		842.699	7.5575		10.3005	4.53761e-05	0.0281786	1.44578	0.999932	1	20.7858	1.9611e-05	0.0108839	6.72673	0.315179	1	12.9115	0.00990069	1	0.237108	0.342806	4.92846	1.59496	3.06142	0.460359	Positive_normalized on PE	C49H96O7P1N1	842.7	M843T453	842.699	842.7	7.4164	7.5793	683377	http://metlin.scripps.edu/metabo_list.php?mass_min=841.68901&mass_max=841.69406	0.101968	0.0768274	0.133731	0.401093	0.274738	0.209807	0.46159	0.586493	0.200998	0.240927	7.42811	2.00429	4.26826	8.68816
PE(O-44:2)		840.684	7.5183		11.8527	1.54793e-05	0.00961265	0.238273	0.997995	1	16.0486	1.39174e-05	0.00915746	4.94931	0.358022	1	9.79552	0.00866263	1	0.62487	0.14889	10.0283	3.09267	6.12092	0.532757	Positive_normalized on PE	C49H94O7P1N1	840.684	M841T451	840.683	840.684	7.4419	7.5803	1.38851e+06	http://metlin.scripps.edu/metabo_list.php?mass_min=839.6733&mass_max=839.67834	0.230664	0.320001	0.0956692	1.11406	0.772987	1.21906	0.621652	0.0416301	0.252709	0.15233	14.5079	4.65184	7.2965	19.1023
PE(O-44:3)		838.668	7.5079		21.5988	8.27145e-08	5.13657e-05	0.287993	0.997544	1	18.7302	4.25013e-08	1.04071e-05	2.80856	0.84254	1	8.54369	0.0113433	1	0.324757	0.0935278	6.08277	0.912101	2.77463	0.450495	Positive_normalized on PE	C49H92O7P1N1	838.668	M839T450	838.668	838.668	7.4391	7.5293	694073	http://metlin.scripps.edu/metabo_list.php?mass_min=837.65772&mass_max=837.66275	0.190041	0.262321	0.151403	0.312163	0.319879	0.50152	0.535975	0.0621272	0.087954	0.130502	8.5947	2.36381	4.38466	9.71348
PE(O-44:4)		836.652	7.4622		24.8262	2.15766e-08	1.33991e-05	0.57389	0.957949	1	6.2716	3.11551e-09	2.36819e-06	1.63847	0.704896	1	2.99444	0.0162881	1	2.35594	1.35205	14.7755	3.86015	7.05473	0.511266	Positive_normalized on PE	C49H90O7P1N1	836.653	M837T448	836.652	836.653	7.4017	7.5073	1.84454e+06	http://metlin.scripps.edu/metabo_list.php?mass_min=835.64203&mass_max=835.64705	3.20496	1.6369	1.40406	2.02813	2.49455	2.11862	3.60439	2.03001	0.662455	1.36369	17.6105	6.95605	9.6465	15.6647
PE(O-44:5)		834.637	7.4324		10.1471	5.07217e-05	0.0314982	0.700866	0.916803	1	2.90528	4.44806e-05	0.0282224	1.30609	0.81058	1	1.70752	0.197888	1	9.99477	7.00499	29.0376	13.0541	17.0663	0.452518	Positive_normalized on PE	C49H88O7P1N1	834.637	M835T446	834.636	834.637	7.3846	7.4776	4.67003e+06	http://metlin.scripps.edu/metabo_list.php?mass_min=833.62644&mass_max=833.63145	16.8514	6.82349	5.94424	6.91157	9.12265	5.48261	18.8275	8.69815	5.75145	6.56538	34.0627	15.5443	17.3614	27.9884
PE(O-44:6)		832.621	7.4026		3.90718	0.0134243	8.3365	0.591634	0.669031	1	1.83063	0.0294998	1	1.05552	0.99911	1	1.44775	0.411926	1	12.6847	7.50473	23.221	13.389	18.3643	0.537608	Positive_normalized on PE	C49H86O7P1N1	832.621	M833T444	832.621	832.621	7.3785	7.4543	4.59548e+06	http://metlin.scripps.edu/metabo_list.php?mass_min=831.61072&mass_max=831.61572	16.2079	9.3715	6.58931	11.5602	15.1207	9.36714	20.5764	8.07731	7.35921	7.07767	26.2105	11.4215	14.6012	31.4338
PE(O-44:7)		830.605	7.391		1.86965	0.147206	91.4147	0.655699	0.783211	1	1.56473	0.195705	1	1.08695	0.995021	1	1.28627	0.765335	1	6.80009	4.45881	10.6403	7.39135	8.74674	0.887978	Positive_normalized on PE	C49H84O7P1N1	830.606	M831T443	830.604	830.605	7.3679	7.4205	2.35788e+06	http://metlin.scripps.edu/metabo_list.php?mass_min=829.59479&mass_max=829.59977	10.2414	4.61522	3.75486	4.47818	7.18157	5.0343	12.2951	4.68182	4.7616	3.93302	11.3677	5.78544	7.30224	17.0424
PE(O-44:8)		828.588	7.4149		3.01663	0.0368907	22.9091	0.776749	0.856258	1	1.60789	0.0354691	1	1.28639	0.522431	1	1.29132	0.542078	1	3.3862	2.63023	5.44462	4.35598	4.37267	2.71243	Positive_normalized on PE	C49H82O7P1N1	828.59	M829T445	828.587	828.589	7.3659	7.4366	1.23878e+06	http://metlin.scripps.edu/metabo_list.php?mass_min=827.57764&mass_max=827.58261	5.14654	2.64234	2.85712	2.03786	2.84189	1.76983	6.40784	2.68112	2.65979	2.54977	5.20274	3.14441	7.12579	5.66771
PE(O-46:6)		860.652	7.3915		5.8875	0.00176155	1.09392	0.809705	0.999829	1	5.61855	0.00201424	1	1.36357	0.994223	1	3.97692	0.0730711	1	0.875417	0.708829	4.91857	1.19369	3.48146	0.682914	Positive_normalized on PE	C51H90O7P1N1	860.653	M861T443	860.652	860.652	7.3484	7.4514	684346	http://metlin.scripps.edu/metabo_list.php?mass_min=859.64179&mass_max=859.64696	0.969989	0.464559	0.29545	0.610591	0.569362	0.77503	2.44293	0.750872	0.872041	0.503574	6.28757	1.89198	3.10927	7.85549
PE(O-46:7)		858.636	7.3658		1.1381	0.361452	224.462	0.52391	0.812563	1	1.61449	0.434305	1	1.12821	0.994832	1	1.07934	0.99931	1	2.51587	1.31809	4.06183	2.83843	2.71548	0.754321	Positive_normalized on PE	C51H88O7P1N1	858.637	M859T442	858.635	858.637	7.3301	7.4309	828896	http://metlin.scripps.edu/metabo_list.php?mass_min=857.6261&mass_max=857.63125	4.67223	0.781661	0.617003	1.02235	2.28041	1.86103	6.37638	1.60388	1.3571	0.99328	4.47247	2.23645	1.49983	6.40792
PE(O-46:8)		856.619	7.3494		4.57821	0.00652907	4.05456	0.64814	0.960476	1	2.71023	0.0102515	1	1.48943	0.76458	1	0.783098	0.984781	1	0.941693	0.610349	2.5522	1.40259	0.737438	2.72889	Positive_normalized on PE	C51H86O7P1N1	856.621	M857T441	856.618	856.621	7.2968	7.4339	392056	http://metlin.scripps.edu/metabo_list.php?mass_min=855.60876&mass_max=855.6139	1.67157	0.195071	0.310096	0.238298	0.281732	0.236448	3.65864	0.660395	0.79361	0.377041	3.14433	1.11297	1.02183	2.30961
PG(28:0)		665.44	6.8703		1	1	1	1	1	1	1	1	1	1	1	1	1	1	1	100	100	100	100	100	-0.00151494	Negative_normalized on PG	C34H67O10P1	665.44	M665T412	665.44	665.44	6.7936	6.9309	4.74208e+08	http://metlin.scripps.edu/metabo_list.php?mass_min=666.44613&mass_max=666.45012	100	100	100	100	100	100	100	100	100	100	100	100	100	100
PG(30:0)		693.472	6.8047		1.00449	0.423842	279.312	0.88256	0.975706	1	0.72253	0.463544	1	1.09665	0.969859	1	0.874293	0.9357	1	0.265258	0.234106	0.191657	0.290895	0.231913	-0.188732	Negative_normalized on PG	C36H71O10P1	693.471	M693T408	693.471	693.474	6.604	6.9309	1.17739e+06	http://metlin.scripps.edu/metabo_list.php?mass_min=694.47747&mass_max=694.48163	0.255121	0.480521	0.422886	0.14198	0.252718	0.19905	0.104533	0.295353	0.238254	0.168712	0.225286	0.215474	0.247429	0.0913368
PG(32:0)		721.503	6.7372		0.160799	0.956178	630.121	1.03865	0.99953	1	0.943608	0.994511	1	0.962125	0.998817	1	1.08108	0.981738	1	1.29831	1.34849	1.22509	1.24913	1.40357	-0.513861	Negative_normalized on PG	C38H75O10P1	721.503	M722T404	721.503	721.507	6.4597	6.7988	6.25692e+06	http://metlin.scripps.edu/metabo_list.php?mass_min=722.50893&mass_max=722.51325	1.2903	0.504093	1.40113	1.50152	2.04065	1.57424	0.776221	1.4108	1.36815	1.26652	2.00197	0.481082	1.87153	1.03263
PG(32:1)		719.487	6.7471		0.3919	0.812426	535.389	0.556919	0.773429	1	0.817366	0.967926	1	0.597217	0.666951	1	0.824525	0.97582	1	1.501	0.835933	1.22686	0.896421	1.23761	-0.251312	Negative_normalized on PG	C38H73O10P1	719.487	M719T405	719.487	719.488	6.6809	6.8615	5.48468e+06	http://metlin.scripps.edu/metabo_list.php?mass_min=720.49309&mass_max=720.49741	1.06582	1.10552	0.483714	4.05917	1.16741	1.89107	0.734281	0.774692	0.96968	0.763426	0.898669	0.288947	0.947881	4.85917
PG(33:0)		735.519	6.7144		0.564456	0.690654	455.141	0.802439	0.984759	1	1.12917	0.991871	1	1.4427	0.617786	1	1.20204	0.964371	1	0.210401	0.168834	0.237578	0.303545	0.252911	-0.490386	Negative_normalized on PG	C39H77O10P1	735.518	M736T403	735.519	735.521	6.5622	6.8093	1.16393e+06	http://metlin.scripps.edu/metabo_list.php?mass_min=736.52452&mass_max=736.52893	0.210708	0.0838961	0.0449049	0.334485	0.408978	0.291662	0.0981729	0.141492	0.19657	0.168439	0.37194	0.108512	0.418496	0.273344
PG(33:1)		733.503	6.6936		0.901236	0.478153	315.103	0.701685	0.292784	1	0.816465	0.491479	1	0.872803	0.769206	1	0.912971	0.932693	1	0.850721	0.596938	0.694584	0.742512	0.776683	-0.587253	Negative_normalized on PG	C39H75O10P1	733.503	M734T402	733.503	733.506	6.4061	6.7919	3.67474e+06	http://metlin.scripps.edu/metabo_list.php?mass_min=734.50895&mass_max=734.51335	0.843769	0.771946	0.665715	0.461853	0.856232	1.52892	0.826613	0.561187	0.711194	0.518433	0.988785	0.501088	0.816104	0.841003
PG(34:0)		749.534	6.7036		1.4077	0.260316	171.548	0.152833	0.162546	1	0.392882	0.214515	1	0.635321	0.639172	1	0.651689	0.702576	1	2.97075	0.454028	1.16715	1.88738	1.93601	-0.107566	Negative_normalized on PG	C40H79O10P1	749.534	M750T402	749.534	749.535	6.5496	6.7811	9.02797e+06	http://metlin.scripps.edu/metabo_list.php?mass_min=750.53986&mass_max=750.54435	0.492547	0.389057	4.24667	4.69187	0.92105	6.89767	3.1564	0.467787	0.515604	0.378692	1.05629	0.270283	1.02953	0.802644
PG(34:1)		747.519	6.676		5.63195	0.00225329	1.48492	0.436894	0.00109684	0.795574	0.664748	0.0126129	1	0.76209	0.101159	1	0.886403	0.697642	1	52.7551	23.0484	35.0688	40.2041	46.7623	-0.188207	Negative_normalized on PG	C40H77O10P1	747.518	M748T401	747.519	747.519	6.5679	6.7449	2.01358e+08	http://metlin.scripps.edu/metabo_list.php?mass_min=748.52427&mass_max=748.52875	47.1854	52.0993	47.3877	57.82	44.3611	83.9184	36.5137	20.4808	26.7371	21.9273	50.3366	24.7774	36.6876	32.4105
PG(34:2)		745.503	6.6687		7.4014	0.000446277	0.294097	0.462997	0.00463725	1	0.430412	0.000145811	0.0779179	0.751957	0.128205	1	0.612655	0.0119691	1	5.39064	2.49585	2.3202	4.05353	3.3026	-0.537559	Negative_normalized on PG	C40H75O10P1	745.503	M746T400	745.503	745.503	6.5496	6.7449	1.77988e+07	http://metlin.scripps.edu/metabo_list.php?mass_min=746.50888&mass_max=746.51335	3.98556	5.99027	5.89761	4.6056	3.83556	9.43925	3.98065	2.15595	2.80221	2.52939	3.29765	1.83007	2.47755	1.79325
PG(35:1)		761.534	6.6679		4.71712	0.00564833	3.72225	0.450403	0.00202523	1	0.773367	0.143261	1	0.706797	0.0393296	1	0.890595	0.743928	1	5.09003	2.29257	3.93646	3.59762	4.53315	-0.184659	Negative_normalized on PG	C41H79O10P1	761.534	M762T400	761.534	761.535	6.5496	6.7449	1.95776e+07	http://metlin.scripps.edu/metabo_list.php?mass_min=762.53988&mass_max=762.54445	4.07434	5.1482	4.36498	6.2842	4.7073	7.28212	3.76907	1.88826	2.95316	2.03629	5.82186	2.41306	3.08573	4.08776
PG(35:2)		759.519	6.6516		4.06307	0.0113191	7.45932	0.392253	0.0108808	1	0.512666	0.00799049	1	0.68507	0.119315	1	0.666406	0.110606	1	1.15438	0.45281	0.591811	0.790832	0.769286	-0.330062	Negative_normalized on PG	C41H77O10P1	759.518	M760T399	759.519	759.519	6.5496	6.7271	3.86362e+06	http://metlin.scripps.edu/metabo_list.php?mass_min=760.52434&mass_max=760.5289	0.657606	1.1461	0.944854	1.21931	0.968291	2.33857	0.805937	0.376822	0.533792	0.447815	0.871005	0.481228	0.546153	0.543407
PG(36:1)		775.55	6.6503		0.891952	0.483301	318.495	0.576894	0.294494	1	0.79065	0.671361	1	0.730493	0.462939	1	0.805287	0.748293	1	71.2222	41.0877	56.3118	52.0273	57.3543	0.128219	Negative_normalized on PG	C42H81O10P1	775.549	M776T399	775.55	775.55	6.5496	6.7271	2.68029e+08	http://metlin.scripps.edu/metabo_list.php?mass_min=776.55524&mass_max=776.55989	73.5878	64.8441	61.63	116.838	99.9443	50.4614	31.2501	27.1366	64.5533	31.5732	82.8808	22.9064	19.531	94.0012
PG(36:2)		773.534	6.6336		1.72815	0.175315	115.533	0.58053	0.170663	1	0.787915	0.516777	1	0.691304	0.204939	1	0.953874	0.996376	1	11.341	6.58379	8.93574	7.84008	10.8179	-0.194722	Negative_normalized on PG	C42H79O10P1	773.534	M774T398	773.534	773.535	6.5314	6.7094	4.51111e+07	http://metlin.scripps.edu/metabo_list.php?mass_min=774.53985&mass_max=774.54449	9.14897	10.5228	9.35928	14.3254	11.5259	18.1508	6.35389	5.09804	9.08257	5.57074	13.3914	5.80195	6.21478	8.70842
PG(36:3)		771.519	6.6168		2.07766	0.11395	75.0929	0.691703	0.0705405	1	0.810056	0.189304	1	0.937145	0.921346	1	0.934828	0.922328	1	2.03141	1.40513	1.64556	1.90373	1.89902	-0.221237	Negative_normalized on PG	C42H77O10P1	771.518	M772T397	771.519	771.519	6.5314	6.7094	8.80653e+06	http://metlin.scripps.edu/metabo_list.php?mass_min=772.52423&mass_max=772.52885	2.01357	1.84931	1.88893	2.0656	1.79013	2.88837	1.72397	1.22954	1.45442	1.53144	2.06192	1.0345	2.22339	1.39162
PG(36:4)		769.503	6.6026		0.903518	0.476894	314.273	0.692367	0.765305	1	0.709212	0.626424	1	0.928615	0.995946	1	1.14104	0.957666	1	2.65894	1.84096	1.88575	2.46913	3.03396	-0.286876	Negative_normalized on PG	C42H75O10P1	769.503	M770T396	769.503	769.504	6.5314	6.6739	1.20561e+07	http://metlin.scripps.edu/metabo_list.php?mass_min=770.50863&mass_max=770.51325	3.03234	1.68378	2.77436	1.63535	1.87765	5.35012	2.25899	1.70832	2.13187	1.68271	2.28882	0.855099	3.51219	0.700412
PG(36:5)		767.489	6.5975		9.25884	9.85734e-05	0.0649599	0.436833	0.00244176	1	0.464609	0.000275943	0.121146	0.745732	0.100184	1	0.426732	0.00019092	0.104661	1.05375	0.460313	0.489582	0.785815	0.449668	-1.62975	Negative_normalized on PG	C42H73O10P1	767.487	M767T396	767.488	767.489	6.5314	6.6874	3.27028e+06	http://metlin.scripps.edu/metabo_list.php?mass_min=768.49402&mass_max=768.49863	1.11673	0.913659	1.41535	1.03061	0.865054	1.47638	0.558471	0.400948	0.337516	0.642473	0.527743	0.328105	0.503592	0.712149
PG(37:1)		789.566	6.639		1.97763	0.12886	84.9187	0.670836	0.88694	1	1.62235	0.260254	1	0.852973	0.982316	1	1.39805	0.668207	1	1.0264	0.688546	1.66518	0.875492	1.43496	-0.241267	Negative_normalized on PG	C43H83O10P1	789.565	M790T398	789.565	789.566	6.5314	6.7094	5.56195e+06	http://metlin.scripps.edu/metabo_list.php?mass_min=790.57114&mass_max=790.57588	1.22002	0.97109	0.890442	1.7882	1.20264	0.624879	0.487538	0.471682	1.05606	0.537894	2.43423	0.624649	0.393362	2.63519
PG(38:1)		803.581	6.6203		0.868092	0.496731	327.346	0.612019	0.681287	1	1.1016	0.989674	1	0.963207	0.999798	1	1.27342	0.769931	1	0.190052	0.116315	0.20936	0.183059	0.242015	-0.199646	Negative_normalized on PG	C44H85O10P1	803.581	M804T397	803.581	803.582	6.5802	6.6916	966048	http://metlin.scripps.edu/metabo_list.php?mass_min=804.58672&mass_max=804.59155	0.218125	0.156252	0.121998	0.356251	0.276933	0.141055	0.0597502	0.171402	0.105752	0.0717921	0.319547	0.171264	0.0780037	0.272225
PG(38:2)		801.566	6.6162		5.22826	0.00335515	2.21104	0.847618	0.995194	1	2.30639	0.0109911	1	0.709896	0.887101	1	1.70235	0.299244	1	0.539862	0.457597	1.24513	0.383246	0.919033	-0.300033	Negative_normalized on PG	C44H83O10P1	801.565	M802T397	801.566	801.566	6.5496	6.6916	3.43052e+06	http://metlin.scripps.edu/metabo_list.php?mass_min=802.57116&mass_max=802.57597	0.494437	0.457636	0.456777	0.875649	0.647354	0.568103	0.279079	0.3117	0.682208	0.378883	1.89862	0.466529	0.477119	1.40608
PG(38:3)		799.55	6.5991		0.758755	0.561893	370.287	0.986889	0.999994	1	1.05662	0.994477	1	0.766727	0.550933	1	1.01911	0.999933	1	1.71496	1.69248	1.81207	1.31491	1.74774	-0.363405	Negative_normalized on PG	C44H81O10P1	799.549	M800T396	799.55	799.55	6.5153	6.6874	7.72228e+06	http://metlin.scripps.edu/metabo_list.php?mass_min=800.55556&mass_max=800.56035	1.60399	1.00179	1.41205	2.10709	2.63772	2.1462	1.0959	1.18962	2.4675	1.4203	2.57808	0.759669	1.42929	1.31611
PG(38:4)		797.534	6.5674		0.478343	0.751286	495.097	1.09137	0.995826	1	0.818447	0.885134	1	0.851818	0.939654	1	1.10609	0.983652	1	3.7342	4.07538	3.05624	3.18086	4.13036	-0.339326	Negative_normalized on PG	C44H79O10P1	797.534	M798T394	797.534	797.535	6.4954	6.6561	1.71169e+07	http://metlin.scripps.edu/metabo_list.php?mass_min=798.5399&mass_max=798.54468	4.42548	2.03274	3.90382	3.57241	4.03833	5.15031	3.0163	3.38139	5.15672	3.68803	4.22856	0.969524	4.8218	1.235
PG(38:5)		795.519	6.564		1.1513	0.355755	234.443	0.649574	0.512082	1	0.602207	0.196082	1	0.86544	0.918204	1	0.874358	0.942527	1	2.37684	1.54393	1.43135	2.05701	2.07821	-0.390548	Negative_normalized on PG	C44H77O10P1	795.518	M796T394	795.519	795.519	6.4786	6.6525	9.55115e+06	http://metlin.scripps.edu/metabo_list.php?mass_min=796.5243&mass_max=796.52907	3.92675	1.4267	2.38832	2.35838	1.79387	3.23984	1.50399	1.40849	1.59136	1.63195	1.89258	0.653815	2.46084	0.865225
PI(32:0)		809.519	8.1406		1.54849	0.218878	144.241	0.804903	0.962352	1	0.908287	0.993896	1	1.31078	0.684391	1	0.578139	0.46718	1	718.707	578.49	652.793	942.064	415.513	0.309154	Negative_normalized on PE	C41H79O13P1	809.519	M810T488	809.518	809.519	8.0825	8.1958	4.59054e+07	http://metlin.scripps.edu/metabo_list.php?mass_min=810.52393&mass_max=810.52879	1834.6	500.66	443.173	530.468	1058.57	210.381	453.103	640.31	606.249	488.912	712.101	203.502	1150.3	495.059
PI(32:1)		807.503	8.142		1.09356	0.381285	251.267	0.913472	0.997694	1	0.775125	0.839535	1	1.02447	0.999957	1	0.501724	0.273668	1	701.019	640.362	543.378	718.175	351.718	-0.235043	Negative_normalized on PE	C41H77O13P1	807.503	M808T489	807.502	807.504	7.9259	8.3923	3.82781e+07	http://metlin.scripps.edu/metabo_list.php?mass_min=808.50873&mass_max=808.51357	1509.41	454.49	289.575	558.565	1376.35	206.063	512.681	644.906	724.918	551.262	550.54	120.032	805.663	534.215
PI(32:2)		805.488	8.1398		7.79024	0.000320553	0.211244	1.8603	0.0389108	1	0.489203	0.146378	1	1.21955	0.792499	1	0.362295	0.0627747	1	36.2719	67.4767	17.7443	44.2354	13.1411	-0.67023	Negative_normalized on PE	C41H75O13P1	805.487	M805T488	805.486	805.489	8.0854	8.2968	2.2522e+06	http://metlin.scripps.edu/metabo_list.php?mass_min=806.49343&mass_max=806.49826	61.5176	34.2231	24.8633	21.086	54.7603	16.7846	40.6684	70.4262	77.4984	54.5055	8.06024	3.4583	29.4193	10.7591
PI(33:0)		823.535	8.1365		1.05271	0.40032	263.811	1.23202	0.940478	1	1.2654	0.806364	1	1.07344	0.997749	1	0.66132	0.678613	1	181.383	223.467	229.522	194.703	119.952	-0.0724561	Negative_normalized on PE	C42H81O13P1	823.534	M824T488	823.533	823.535	7.9619	8.1585	1.21981e+07	http://metlin.scripps.edu/metabo_list.php?mass_min=824.53985&mass_max=824.54479	325.952	160.563	92.2632	168.014	316.554	92.6329	113.702	254.308	209.048	207.044	198.124	42.8757	395.592	193.372
PI(33:1)		821.519	8.1292		0.971048	0.440842	290.515	1.17893	0.960816	1	1.02725	0.999922	1	1.14799	0.950987	1	0.660236	0.568937	1	412.014	485.734	423.243	472.988	272.026	-0.279646	Negative_normalized on PE	C42H79O13P1	821.519	M822T488	821.519	821.519	8.0825	8.1585	2.69573e+07	http://metlin.scripps.edu/metabo_list.php?mass_min=822.52437&mass_max=822.5293	745.558	370.044	168.935	401.407	684.378	189.494	324.28	505.313	512.752	439.137	361.847	92.3059	702.491	348.827
PI(33:2)		819.504	8.1053		3.62399	0.0183899	12.119	1.47719	0.358353	1	0.700021	0.540493	1	1.14737	0.928578	1	0.490017	0.148003	1	52.1153	76.9841	36.4818	59.7954	25.5374	-1.35423	Negative_normalized on PE	C42H77O13P1	819.503	M820T486	819.503	819.505	8.0753	8.2041	3.33796e+06	http://metlin.scripps.edu/metabo_list.php?mass_min=820.50962&mass_max=820.51453	85.8127	56.4005	26.9842	39.9331	79.6903	22.553	53.4334	80.0476	85.3213	65.5835	31.7561	5.26436	72.2911	18.3365
PI(34:1)		835.534	8.0846		1.17184	0.34705	228.706	1.11403	0.990507	1	0.955793	0.99934	1	1.14414	0.945743	1	0.618921	0.420253	1	9711.36	10818.7	9282.04	11111.1	6010.56	0.0363	Negative_normalized on PE	C43H81O13P1	835.534	M836T485	835.534	835.535	8.0336	8.1225	6.03245e+08	http://metlin.scripps.edu/metabo_list.php?mass_min=836.53972&mass_max=836.54474	17621.9	8379.92	4464.86	10539.7	14922.1	4849.57	7201.45	11840.4	10148.7	10467.1	7292.84	2089.97	14916.9	8892.14
PI(34:2)		833.52	8.0866		1.20257	0.334391	220.364	1.26322	0.831685	1	1.00981	0.999998	1	1.29147	0.599284	1	0.78198	0.818671	1	1817.6	2296.04	1835.43	2347.38	1421.33	-0.959467	Negative_normalized on PE	C43H79O13P1	833.519	M834T485	833.519	833.52	8.0565	8.1115	1.30931e+08	http://metlin.scripps.edu/metabo_list.php?mass_min=834.52491&mass_max=834.52991	3309.8	1801.44	1309.34	1510.76	2358.97	961.57	1471.33	2472.02	2282.5	2133.59	1533.31	761.978	3338.42	1324.39
PI(34:3)		831.504	8.0839		8.53758	0.000173577	0.114387	1.50492	0.175884	1	0.5358	0.0847189	1	1.36282	0.227565	1	0.493417	0.0665256	1	149.163	224.479	79.9218	203.283	73.5997	-1.07011	Negative_normalized on PE	C43H77O13P1	831.503	M832T485	831.504	831.504	8.0473	8.1181	9.66567e+06	http://metlin.scripps.edu/metabo_list.php?mass_min=832.50935&mass_max=832.51434	294.517	140.99	110.912	100.553	199.052	78.9929	119.127	228.61	233.325	211.501	66.9588	33.7935	168.437	42.3185
PI(34:4)		829.488	8.0671		6.44598	0.00104412	0.688076	1.68535	0.202864	1	0.462456	0.194051	1	1.3104	0.647008	1	0.257161	0.0544405	1	26.2306	44.2079	12.1305	34.3727	6.74548	-1.03662	Negative_normalized on PE	C43H75O13P1	829.487	M829T484	829.488	829.489	7.9977	8.1727	1.59826e+06	http://metlin.scripps.edu/metabo_list.php?mass_min=830.49369&mass_max=830.49866	68.21	24.2506	15.5775	12.5948	34.1647	9.15902	19.6578	46.0747	46.5447	40.0042	6.6353	4.55998	22.998	5.70693
PI(35:0)		851.566	8.0875		1.72344	0.176339	116.207	0.972463	0.999976	1	1.53779	0.19795	1	1.07244	0.997054	1	0.841732	0.955089	1	89.627	87.1589	137.827	96.1192	75.4419	-0.398727	Negative_normalized on PE	C44H85O13P1	851.566	M852T485_2	851.566	851.567	7.9195	8.1355	6.61374e+06	http://metlin.scripps.edu/metabo_list.php?mass_min=852.57135&mass_max=852.57646	161.821	85.0397	40.044	82.2465	126.113	81.5656	50.5595	106.542	69.1563	85.7787	136.73	33.8953	197.7	142.164
PI(35:1)		849.551	8.0839		1.74668	0.171346	112.917	1.12962	0.991885	1	1.6436	0.125105	1	1.30778	0.701905	1	0.943682	0.999251	1	557.025	629.224	915.528	728.466	525.654	-0.482145	Negative_normalized on PE	C44H83O13P1	849.55	M850T485	849.549	849.551	7.9073	8.1115	4.54388e+07	http://metlin.scripps.edu/metabo_list.php?mass_min=850.55577&mass_max=850.56087	971.558	563.781	248.329	592.921	784.649	273.536	464.396	710.123	570.127	607.423	850.001	294.537	1250.98	926.578
PI(35:2)		847.535	8.0655		1.03077	0.41088	270.77	1.0929	0.992029	1	1.08296	0.98648	1	1.2017	0.763329	1	0.769141	0.701493	1	483.276	528.172	523.371	580.751	371.707	-0.613155	Negative_normalized on PE	C44H81O13P1	847.534	M848T484	847.535	847.536	7.8701	8.0831	3.4085e+07	http://metlin.scripps.edu/metabo_list.php?mass_min=848.54023&mass_max=848.54532	783.21	491.541	335.896	476.968	612.889	273.719	408.708	558.454	549.809	476.252	500.229	272.995	792.656	476.687
PI(35:3)		845.519	8.0508		5.76397	0.00198309	1.30685	1.2294	0.707648	1	0.559705	0.056851	1	1.13132	0.86953	1	0.520684	0.0442209	1	73.4682	90.322	41.1205	83.1162	38.2537	-0.721136	Negative_normalized on PE	C44H79O13P1	845.519	M846T483	845.519	845.52	8.0289	8.0868	4.44801e+06	http://metlin.scripps.edu/metabo_list.php?mass_min=846.52468&mass_max=846.52976	126.251	63.7337	52.5034	67.7766	106.583	41.5262	55.9032	92.3538	94.2102	84.402	38.8808	14.4783	87.7925	31.0416
PI(35:4)		843.503	8.0319		1.94138	0.134744	88.7961	1.14528	0.991651	1	0.595771	0.573801	1	1.40565	0.570925	1	0.671148	0.75465	1	27.1981	31.1493	16.2038	38.2309	18.254	-0.248722	Negative_normalized on PE	C44H77O13P1	843.503	M844T482	843.503	843.504	7.9948	8.0716	1.82027e+06	http://metlin.scripps.edu/metabo_list.php?mass_min=844.50864&mass_max=844.5137	81.5218	23.4327	14.2345	12.7857	35.2905	4.87956	18.2418	31.9329	35.0429	26.4722	10.072	4.97951	42.1619	8.27586
PI(36:0)		865.581	8.0461		3.32854	0.0257101	16.9429	1.10416	0.997969	1	1.66164	0.196207	1	0.460819	0.356741	1	1.31662	0.798397	1	236.71	261.366	393.327	109.081	311.657	0.38185	Negative_normalized on PE	C45H87O13P1	865.581	M866T483_2	865.58	865.582	7.9057	8.2089	1.74201e+07	http://metlin.scripps.edu/metabo_list.php?mass_min=866.58628&mass_max=866.59148	490.536	225.669	169.779	149.998	253.362	165.474	202.155	252.466	327.161	204.471	463.605	188.396	513.641	195.741
PI(36:1)		863.566	8.0495		2.1859	0.0997971	65.7663	0.960176	0.99984	1	1.53195	0.13599	1	1.3007	0.58944	1	0.874076	0.970162	1	3752.43	3603	5748.56	4880.78	3279.91	-0.532145	Negative_normalized on PE	C45H85O13P1	863.566	M864T483	863.565	863.566	8.0112	8.0821	2.89687e+08	http://metlin.scripps.edu/metabo_list.php?mass_min=864.57143&mass_max=864.57661	6911.25	3946.61	1871.86	3687.24	4853.25	1704.07	3292.76	4132	3073.77	3603.22	5240.21	2325.25	6836.8	7035.51
PI(36:2)		861.551	8.032		1.16689	0.349132	230.078	1.00069	1	1	1.23375	0.569727	1	1.21764	0.627707	1	0.887805	0.948257	1	5600.13	5603.98	6909.18	6818.96	4971.82	-0.637927	Negative_normalized on PE	C45H83O13P1	861.55	M862T482	861.55	861.551	8.011	8.0684	4.1436e+08	http://metlin.scripps.edu/metabo_list.php?mass_min=862.55588&mass_max=862.56105	9281.11	5579.58	4323.2	5730.97	6316.21	3409.89	4559.95	6021.01	5573.4	5217.53	6677.53	4121.73	8752.04	7620.74
PI(36:3)		859.535	8.0303		0.90274	0.477323	314.556	1.17938	0.910708	1	0.990977	0.999997	1	1.17771	0.815587	1	0.805116	0.787959	1	1951.26	2301.28	1933.65	2298.01	1570.99	-0.825645	Negative_normalized on PE	C45H81O13P1	859.534	M860T482	859.534	859.535	7.9931	8.0559	1.36645e+08	http://metlin.scripps.edu/metabo_list.php?mass_min=860.54039&mass_max=860.54555	3399.67	1727.45	1555.12	1851.98	2764.56	1001.45	1358.56	2467.01	2402.74	2034.07	1749.06	1068.57	3359.17	1569.43
PI(36:4)		857.519	7.9949		2.78675	0.0483633	31.8714	0.779372	0.83746	1	0.58884	0.181296	1	1.15455	0.878722	1	0.59784	0.224603	1	5541.35	4318.77	3262.97	6397.75	3312.84	-0.804337	Negative_normalized on PE	C45H79O13P1	857.519	M858T480	857.519	857.52	7.9718	8.0313	3.15969e+08	http://metlin.scripps.edu/metabo_list.php?mass_min=858.52473&mass_max=858.52987	11048	4210.28	3737.34	5055.63	8632.38	2167.43	3938.4	4451.23	4542.74	3962.33	3256.05	1574.19	6526.85	2442.18
PI(36:5)		855.504	7.9894		7.10654	0.00057681	0.380118	1.32677	0.640855	1	0.377414	0.0348302	1	1.30811	0.476562	1	0.422237	0.0677448	1	468.53	621.63	176.83	612.891	197.83	-1.04009	Negative_normalized on PE	C45H77O13P1	855.503	M856T479	855.504	855.504	7.9591	8.0684	2.77144e+07	http://metlin.scripps.edu/metabo_list.php?mass_min=856.50928&mass_max=856.51441	1048.58	379.738	304.542	309.928	623.382	156.275	457.262	657.671	617.157	590.064	168.838	73.3166	536.019	84.5898
PI(36:6)		853.489	7.9808		9.92798	5.95677e-05	0.0392551	2.18349	0.021997	1	0.585471	0.493996	1	1.81496	0.0464098	1	0.275063	0.104534	1	17.1179	37.3769	10.022	31.0683	4.70851	-1.8042	Negative_normalized on PE	C45H75O13P1	853.487	M853T479	853.488	853.49	7.9575	8.0467	1.2545e+06	http://metlin.scripps.edu/metabo_list.php?mass_min=854.49429&mass_max=854.49941	40.186	18.0321	13.7394	8.85303	14.3159	2.20034	22.4988	29.376	42.5855	40.1691	5.07052	4.10264	26.9637	0.155357
PI(37:1)		877.582	8.0306		4.53241	0.00685072	4.51462	1.08454	0.9995	1	2.51809	0.0027205	1	1.30474	0.866468	1	1.34148	0.835079	1	47.1807	51.1694	118.805	61.5583	63.2921	-0.740077	Negative_normalized on PE	C46H87O13P1	877.581	M878T482_2	877.582	877.583	7.9931	8.0684	4.63554e+06	http://metlin.scripps.edu/metabo_list.php?mass_min=878.58723&mass_max=878.59249	86.0434	47.8805	16.3376	52.2499	70.5148	17.3261	39.9123	60.9989	43.5441	48.9651	108.802	41.1317	141.76	163.667
PI(37:2)		875.567	8.0141		6.91062	0.000685936	0.452032	1.11799	0.999142	1	3.23357	0.000399777	0.242607	1.30091	0.930106	1	2.06921	0.13689	1	136.556	152.669	441.564	177.648	282.564	-1.5756	Negative_normalized on PE	C46H85O13P1	875.566	M876T481	875.566	875.568	7.9751	8.1671	1.66098e+07	http://metlin.scripps.edu/metabo_list.php?mass_min=876.57231&mass_max=876.57757	227.968	120.016	84.6589	162.425	163.777	94.3882	102.662	163.236	161.126	133.645	458.195	260.828	410.212	713.902
PI(37:3)		873.551	7.9947		2.20802	0.0971359	64.0126	0.412626	0.0402704	1	0.755701	0.425009	1	0.879905	0.891421	1	0.687691	0.252557	1	624.686	257.761	472.076	549.664	429.591	-1.22444	Negative_normalized on PE	C46H83O13P1	873.55	M874T480	873.551	873.551	7.9718	8.0313	3.43959e+07	http://metlin.scripps.edu/metabo_list.php?mass_min=874.55636&mass_max=874.5616	716.851	432.596	331.402	804.165	961.925	766.2	359.665	238.268	300.634	234.383	520.871	306.624	516.055	680.992
PI(37:4)		871.535	7.9597		4.39687	0.00790607	5.2101	0.742091	0.517713	1	0.688663	0.160506	1	1.17127	0.644352	1	0.615643	0.0753588	1	2818.88	2091.87	1941.26	3301.68	1735.43	-1.19292	Negative_normalized on PE	C46H81O13P1	871.534	M872T478	871.535	871.536	7.9379	7.989	1.67886e+08	http://metlin.scripps.edu/metabo_list.php?mass_min=872.54069&mass_max=872.54591	4824.78	2565.72	2196.84	2745.85	3677.5	1707.08	2014.41	2123.4	2127.76	2024.44	1965.61	1037.67	3126.95	1774.79
PI(37:5)		869.52	7.9414		7.14468	0.000557826	0.367607	1.09979	0.969152	1	0.503941	0.015073	1	1.19979	0.548612	1	0.578422	0.0560747	1	445.694	490.169	224.603	534.739	257.799	-1.32226	Negative_normalized on PE	C46H79O13P1	869.519	M870T476	869.518	869.52	7.8836	8.1733	2.71527e+07	http://metlin.scripps.edu/metabo_list.php?mass_min=870.52515&mass_max=870.53036	772.165	416.598	346.009	374.094	531.101	256.796	423.093	469.504	572.632	428.373	245.3	6.34929	492.99	184.065
PI(37:6)		867.503	7.9429		3.82777	0.0146537	9.65678	0.926953	0.999093	1	0.592651	0.472359	1	1.68048	0.0956847	1	0.80736	0.928462	1	14.0592	13.0322	8.33222	23.6262	11.3509	-0.16115	Negative_normalized on PE	C46H77O13P1	867.503	M868T477	867.503	867.504	7.8883	7.997	983842	http://metlin.scripps.edu/metabo_list.php?mass_min=868.5085&mass_max=868.5137	12.9138	8.26976	7.36149	22.8047	14.9701	7.1843	24.9104	10.3356	16.5672	12.194	9.19651	3.67729	12.3935	7.4856
PI(38:2)		889.581	8.0223		6.49639	0.000996953	0.656992	0.384661	0.844334	1	3.17981	0.00373619	1	0.558128	0.87508	1	1.43343	0.89564	1	382.977	147.316	1217.79	213.75	548.969	0.21417	Negative_normalized on PE	C47H87O13P1	889.581	M890T481	889.581	889.582	7.9355	8.0695	3.69207e+07	http://metlin.scripps.edu/metabo_list.php?mass_min=890.58635&mass_max=890.59169	91.3852	54.0114	712.858	158.616	180.148	1361.36	122.458	162.785	162.814	116.35	1298.26	851.644	572.197	1559.24
PI(38:3)		887.565	8.1292		1.09127	0.382328	251.954	0.552974	0.789242	1	1.50619	0.510649	1	1.19913	0.961885	1	1.00953	1	1	1370.57	757.892	2064.35	1643.49	1383.63	0.383586	Negative_normalized on PE	C47H85O13P1	887.566	M888T488	887.565	887.568	8.0471	8.2666	8.97807e+07	http://metlin.scripps.edu/metabo_list.php?mass_min=888.57056&mass_max=888.57589	1217.35	878.103	484.494	3262.95	1979.36	1048.06	723.709	575.503	993.503	704.671	810.75	1768.08	1093.07	3810.82
PI(38:4)		885.551	7.9235		6.16391	0.00135636	0.893842	0.620072	0.091636	1	0.787028	0.300704	1	1.20466	0.333968	1	0.666389	0.0592208	1	111476	69123.4	87735	134292	74286.7	-0.688393	Negative_normalized on PE	C47H83O13P1	885.55	M886T475	885.55	885.551	7.8836	7.944	6.89029e+09	http://metlin.scripps.edu/metabo_list.php?mass_min=886.55587&mass_max=886.56118	179541	103450	108218	100268	115721	88463.4	84673.5	71816	68173.7	67380.6	91928.4	50550.1	106640	86683.9
PI(38:5)		883.535	7.9057		1.65239	0.19252	126.871	0.955032	0.998676	1	0.928167	0.979591	1	1.25026	0.389502	1	0.844209	0.787106	1	22696	21675.4	21065.7	28375.9	19160.2	-1.10881	Negative_normalized on PE	C47H81O13P1	883.534	M884T474	883.535	883.536	7.8652	7.9245	1.6019e+09	http://metlin.scripps.edu/metabo_list.php?mass_min=884.54059&mass_max=884.54589	40595.4	21740.3	21370.7	18532.4	22186.6	16569.8	17877.1	22991.1	22122.3	19912.9	20258.7	13572.9	34424.3	18622.7
PI(38:6)		881.52	7.9057		3.87563	0.013899	9.15945	1.04097	0.999372	1	0.748628	0.470559	1	1.30662	0.299138	1	0.643674	0.214	1	1102.59	1147.76	825.426	1440.66	709.706	-1.64459	Negative_normalized on PE	C47H79O13P1	881.519	M882T474	881.52	881.52	7.8652	7.9254	7.0988e+07	http://metlin.scripps.edu/metabo_list.php?mass_min=882.52542&mass_max=882.53071	2000.07	915.053	836.88	989.507	1437.78	627.3	911.517	1132.84	1259.93	1050.51	764.625	362.25	1469.79	899.217
PI(38:7)		879.504	7.8879		7.19065	0.000535829	0.353111	2.20156	0.0171535	1	0.528148	0.361977	1	1.42335	0.456873	1	0.433157	0.24453	1	26.9289	59.2855	14.2224	38.3291	11.6644	-0.909375	Negative_normalized on PE	C47H77O13P1	879.503	M880T473	879.502	879.506	7.81	7.9956	1.91139e+06	http://metlin.scripps.edu/metabo_list.php?mass_min=880.50912&mass_max=880.51439	60.933	25.1169	19.3806	8.32545	33.9929	10.0318	30.7214	53.0211	62.8868	61.9486	23.1765	10.1068	20.3588	9.03271
PI(39:3)		901.582	7.9235		5.90391	0.00173418	1.14282	0.388352	0.916522	1	3.80339	0.00235916	1	1.06143	0.999963	1	1.96293	0.53463	1	273.139	106.074	1038.86	289.918	536.153	-0.487452	Negative_normalized on PE	C48H87O13P1	901.581	M902T475	901.581	901.583	7.8652	7.9414	3.1878e+07	http://metlin.scripps.edu/metabo_list.php?mass_min=902.58695&mass_max=902.59236	289.293	244.608	161.836	390.386	348.761	286.238	190.853	104.233	122.027	91.9621	1079.54	671.234	372.041	2357.73
PI(39:4)		899.566	7.8883		12.0661	1.3443e-05	0.00885893	0.914648	0.997235	1	2.61248	5.14468e-06	0.0102309	1.66448	0.0553434	1	1.84327	0.0153298	1	715.751	654.66	1869.88	1191.36	1319.32	-0.166238	Negative_normalized on PE	C48H85O13P1	899.566	M900T473	899.566	899.566	7.8468	7.9235	8.33606e+07	http://metlin.scripps.edu/metabo_list.php?mass_min=900.57101&mass_max=900.57641	1244.78	754.223	602.338	674.005	665.164	572.789	496.951	726.37	598.135	639.474	1987.07	1195.4	1933.47	2524.92
PI(39:5)		897.55	7.8879		5.65172	0.00221043	1.45667	1.05767	0.999206	1	2.05254	0.00071565	0.439029	1.31212	0.52761	1	1.51129	0.161555	1	763.833	807.883	1567.8	1002.24	1154.37	-0.133258	Negative_normalized on PE	C48H83O13P1	897.55	M898T473	897.55	897.551	7.8468	7.9138	7.43119e+07	http://metlin.scripps.edu/metabo_list.php?mass_min=898.55533&mass_max=898.56072	1366.19	774.475	740.175	691.64	766.304	483.642	524.408	875.035	812.335	736.279	1635.43	937.13	2134.01	1987.03
PI(39:6)		895.534	7.8879		1.3289	0.286717	188.946	0.921127	0.99369	1	1.14578	0.871974	1	1.1955	0.718117	1	0.785561	0.681411	1	216.816	199.715	248.424	259.204	170.322	0.134367	Negative_normalized on PE	C48H81O13P1	895.534	M896T473	895.534	895.535	7.815	7.9057	1.50065e+07	http://metlin.scripps.edu/metabo_list.php?mass_min=896.53945&mass_max=896.54482	348.253	186.02	169.574	229.984	281.354	140.535	161.99	192.245	223.054	183.846	239.165	114.579	342.441	351.945
PI(39:7)		893.519	7.8502		2.65987	0.0562497	37.0686	1.61756	0.333115	1	0.642389	0.584659	1	1.45208	0.381734	1	1.04289	0.99974	1	10.7178	17.3367	6.885	15.5631	11.1775	-0.514521	Negative_normalized on PE	C48H79O13P1	893.519	M894T471	893.517	893.52	7.7916	7.9057	827745	http://metlin.scripps.edu/metabo_list.php?mass_min=894.52439&mass_max=894.52975	18.6185	13.1916	11.9381	8.12126	11.822	5.85764	5.47549	19.2387	19.9902	12.7811	4.89741	2.12977	13.364	4.78353
PI(40:3)		915.597	7.9057		6.45197	0.0010384	0.684305	0.568511	0.999069	1	8.3784	0.000877797	0.631222	1.33349	0.999079	1	3.87105	0.347596	1	91.7665	52.1703	768.857	122.37	355.233	-0.228719	Negative_normalized on PE	C49H89O13P1	915.597	M916T474	915.597	915.598	7.8652	7.9608	1.86838e+07	http://metlin.scripps.edu/metabo_list.php?mass_min=916.60232&mass_max=916.60782	59.2485	44.2414	276.084	85.3283	72.4605	54.5443	50.4585	59.6674	56.6281	40.2153	756.526	402.757	297.84	1865.68
PI(40:4)		913.581	7.8822		19.2369	2.44348e-07	0.000161025	0.888303	0.999961	1	8.37852	2.45663e-07	8.45674e-05	1.21208	0.998638	1	2.98053	0.204766	1	1623.03	1441.75	13598.6	1967.25	4837.5	0.120977	Negative_normalized on PE	C49H87O13P1	913.581	M914T473_2	913.581	913.582	7.7549	7.9057	3.22784e+08	http://metlin.scripps.edu/metabo_list.php?mass_min=914.58636&mass_max=914.59184	2662.4	1994.11	1819.92	1269.98	1456.44	1331.39	826.999	1697.49	1261.31	1366.43	15665	8354.15	6874.21	22802.1
PI(40:5)		911.566	7.8708		8.09546	0.000248647	0.163858	0.743892	0.933775	1	2.48703	0.000383731	0.310508	1.0771	0.997895	1	1.13234	0.986008	1	5810.29	4322.23	14450.3	6258.25	6579.2	-0.0324081	Negative_normalized on PE	C49H85O13P1	911.566	M912T472	911.565	911.566	7.8284	7.8903	5.04665e+08	http://metlin.scripps.edu/metabo_list.php?mass_min=912.57086&mass_max=912.57633	8758.99	5739.14	5391.02	6361.12	6816.98	4171.07	3433.73	4693.22	4172.9	4100.56	14121.4	7477.09	11588.2	25232.2
PI(40:6)		909.55	7.8701		3.50786	0.0209617	13.8138	0.796538	0.936072	1	1.78098	0.0205999	1	1.14791	0.948199	1	1.04216	0.9996	1	4038.92	3217.15	7193.22	4636.3	4209.2	-0.109511	Negative_normalized on PE	C49H83O13P1	909.55	M910T472	909.55	909.551	7.8284	7.8903	3.16702e+08	http://metlin.scripps.edu/metabo_list.php?mass_min=910.55528&mass_max=910.56073	6264.94	3615.2	3412.43	4384.61	4440.14	3521.34	2633.77	3306.56	3362.58	2982.31	6650.51	3450.62	6911.43	12736.8
PI(40:7)		907.535	7.8527		1.35049	0.279241	184.02	1.07352	0.999019	1	1.63744	0.120738	1	1.25565	0.804589	1	1.20998	0.901818	1	913.409	980.562	1495.65	1146.92	1105.21	-0.264089	Negative_normalized on PE	C49H81O13P1	907.534	M908T471	907.534	907.535	7.81	7.8884	7.7143e+07	http://metlin.scripps.edu/metabo_list.php?mass_min=908.53977&mass_max=908.54522	1974.86	700.66	721.247	785.527	825.255	682.464	703.844	1059.92	997.02	884.742	1256.74	738.213	2475.96	2018.72
PI(40:8)		905.519	7.8519		0.0746928	0.98925	651.916	0.941726	0.999933	1	1.03237	0.999982	1	1.05124	0.999889	1	0.82039	0.987629	1	175.032	164.832	180.697	184.001	143.595	-0.0217931	Negative_normalized on PE	C49H79O13P1	905.519	M906T471	905.518	905.519	7.8235	7.8708	1.18585e+07	http://metlin.scripps.edu/metabo_list.php?mass_min=906.52392&mass_max=906.52935	713.908	88.5301	117.638	46.3507	78.5514	55.847	124.4	197.961	125.414	171.123	120.255	82.9879	490.865	101.96
PI(40:9)		903.504	7.8356		2.68853	0.054357	35.8213	0.765487	0.978338	1	0.147103	0.149852	1	1.28326	0.903055	1	0.266115	0.284442	1	66.6357	51.0088	9.80234	85.5113	17.7328	-0.852015	Negative_normalized on PE	C49H77O13P1	903.503	M904T470	903.503	903.504	7.7916	7.898	3.28323e+06	http://metlin.scripps.edu/metabo_list.php?mass_min=904.50901&mass_max=904.51444	239.301	37.1578	57.8375	14.6138	28.0338	18.7376	70.7691	60.3242	37.8525	54.8497	4.54672	5.37171	30.1633	6.27266
PI(41:4)		927.598	7.8608		13.5695	5.19059e-06	0.0034206	1.44251	0.999911	1	20.9963	5.8648e-06	0.00332705	1.39476	0.999844	1	8.61862	0.101441	1	9.72386	14.0267	204.165	13.5624	83.8063	-1.09898	Negative_normalized on PE	C50H89O13P1	927.597	M928T472	927.597	927.599	7.8166	7.9061	4.46665e+06	http://metlin.scripps.edu/metabo_list.php?mass_min=928.6031&mass_max=928.60866	20.4824	3.89417	4.52262	16.2973	8.58221	10.5377	3.75068	19.5798	8.14247	14.3579	214.842	119.022	87.0782	416.268
PI(41:5)		925.582	7.8523		20.5607	1.31638e-07	8.67496e-05	1.60474	0.994009	1	12.6642	4.70437e-08	1.74434e-05	1.4839	0.993228	1	4.92341	0.0615962	1	26.4748	42.4852	335.282	39.2858	130.346	-0.582853	Negative_normalized on PE	C50H87O13P1	925.581	M926T471	925.58	925.583	7.81	7.9261	7.72827e+06	http://metlin.scripps.edu/metabo_list.php?mass_min=926.58697&mass_max=926.59253	55.7901	22.3685	31.8014	23.1123	23.6071	15.0502	13.5939	54.3178	37.269	35.8687	339.092	203.798	279.544	583.169
PI(41:6)		923.566	7.8527		11.7008	1.71303e-05	0.0112888	1.28218	0.994569	1	5.2861	1.10409e-05	0.00453719	1.34671	0.970411	1	2.58256	0.138622	1	45.3844	58.1911	239.906	61.1197	117.208	-0.33516	Negative_normalized on PE	C50H85O13P1	923.566	M924T471	923.566	923.567	7.81	7.8884	7.03775e+06	http://metlin.scripps.edu/metabo_list.php?mass_min=924.5711&mass_max=924.57664	92.8512	47.3989	42.4132	37.7256	41.2364	28.3552	27.7107	65.0111	56.2386	53.3237	236.239	117.997	226.19	453.493
PI(41:7)		921.551	7.847		7.39966	0.000446947	0.294538	1.27196	0.994819	1	4.25584	0.000363019	0.251323	1.38645	0.95308	1	2.98068	0.0396891	1	16.9835	21.6023	72.2793	23.5469	50.6224	-0.943634	Negative_normalized on PE	C50H83O13P1	921.55	M922T471	921.551	921.551	7.7916	7.8887	2.53569e+06	http://metlin.scripps.edu/metabo_list.php?mass_min=922.55602&mass_max=922.56155	35.7188	20.5919	15.3045	18.8835	9.56645	7.92721	10.8924	28.2354	14.8283	21.7433	68.3024	34.6022	90.6467	129.886
PI(42:10)		929.519	7.8182		0.433729	0.78293	515.951	1.30805	0.972201	1	1.57784	0.626336	1	1.33309	0.914608	1	1.03614	0.999984	1	32.7407	42.8264	51.6595	43.6464	33.924	-0.107296	Negative_normalized on PE	C51H79O13P1	929.519	M930T469	929.518	929.52	7.7732	7.8702	2.8322e+06	http://metlin.scripps.edu/metabo_list.php?mass_min=930.52393&mass_max=930.5295	113.565	24.1463	25.1645	4.09017	10.8058	13.6534	37.7598	56.6979	25.0621	46.7192	49.639	18.8731	120.521	23.6256
PI(42:3)		943.629	7.8778		6.8489	0.000724753	0.477612	5.05012	0.980758	1	33.6126	0.000519204	0.331064	1.033	1	1	13.3472	0.333062	1	2.5353	12.8035	85.218	2.61897	33.8392	-0.529113	Negative_normalized on PE	C51H93O13P1	943.628	M944T473	943.627	943.629	7.8445	7.9055	1.77239e+06	http://metlin.scripps.edu/metabo_list.php?mass_min=944.63383&mass_max=944.63949	4.06759	0	4.08434	2.24096	1.08928	1.06551	5.1994	19.8732	9.5519	8.98552	77.6027	39.2849	24.32	220.481
PI(42:4)		941.613	7.8673		13.2165	6.44931e-06	0.0042501	2.5878	0.954569	1	15.061	4.23452e-06	0.0039371	1.33214	0.999675	1	5.65795	0.176705	1	17.0163	44.0349	256.283	22.6682	96.2777	-0.562174	Negative_normalized on PE	C51H91O13P1	941.612	M942T472	941.612	941.614	7.7988	7.9591	5.58129e+06	http://metlin.scripps.edu/metabo_list.php?mass_min=942.61821&mass_max=942.62386	40.2387	22.8298	20.9916	11.5607	11.3083	3.99527	8.18999	51.1823	29.7356	51.1867	227.137	139.126	110.385	432.998
PI(42:5)		939.598	7.8543		14.1483	3.66446e-06	0.00241488	1.53998	0.984558	1	7.59904	1.20229e-05	0.00193433	1.04494	0.999998	1	3.72127	0.0610788	1	67.8431	104.477	515.543	70.8916	252.463	-1.17009	Negative_normalized on PE	C51H89O13P1	939.597	M940T471	939.598	939.599	7.8265	7.8884	1.33029e+07	http://metlin.scripps.edu/metabo_list.php?mass_min=940.60314&mass_max=940.60878	112.063	91.1821	80.1083	51.7912	68.1842	34.7218	36.8512	120.528	95.0262	97.8771	510.33	281.826	317.194	869.638
PI(42:6)		937.582	7.8523		10.7986	3.18154e-05	0.0209663	1.52539	0.99214	1	7.68163	4.15169e-05	0.0241605	1.10304	0.999964	1	4.25683	0.0533405	1	71.9237	109.712	552.492	79.335	306.167	-0.522065	Negative_normalized on PE	C51H87O13P1	937.581	M938T471	937.581	937.583	7.81	7.8708	1.50052e+07	http://metlin.scripps.edu/metabo_list.php?mass_min=938.58688&mass_max=938.59251	126.89	72.9896	69.1111	56.1974	73.1263	54.7389	50.4129	115.509	113.288	100.34	563.418	274.67	463.251	1068.53
PI(42:7)		935.567	7.835		13.593	5.11689e-06	0.00337203	2.19707	0.889496	1	9.28493	3.34887e-06	0.00106612	1.6027	0.973518	1	4.87609	0.026739	1	47.274	103.864	438.936	75.7663	230.512	-1.20734	Negative_normalized on PE	C51H85O13P1	935.566	M936T470	935.566	935.568	7.7916	7.8903	1.2044e+07	http://metlin.scripps.edu/metabo_list.php?mass_min=936.57188&mass_max=936.57749	123.079	44.7685	45.2171	24.528	28.7098	24.6093	40.0065	137.934	82.7424	90.9171	391.224	203.882	736.387	488.602
PI(42:8)		933.551	7.834		4.67347	0.00591053	3.89504	1.97075	0.981759	1	7.73215	0.00309568	1	1.35418	0.998957	1	3.36637	0.54048	1	63.0422	124.24	487.452	85.3706	212.224	-0.802963	Negative_normalized on PE	C51H83O13P1	933.55	M934T470	933.551	933.551	7.7732	7.8524	1.30345e+07	http://metlin.scripps.edu/metabo_list.php?mass_min=934.55586&mass_max=934.56146	240.8	35.4425	58.759	9.34923	25.5124	19.3146	52.1182	178.215	70.8726	123.633	350.28	211.479	1279.98	214.385
PI(42:9)		931.535	7.8325		4.93055	0.00453368	2.9877	1.27415	0.99602	1	3.91219	0.00255591	1	1.14601	0.99907	1	1.82245	0.697916	1	128.552	163.795	502.92	147.322	234.28	-0.751094	Negative_normalized on PE	C51H81O13P1	931.534	M932T470	931.535	931.536	7.7732	7.8523	1.64387e+07	http://metlin.scripps.edu/metabo_list.php?mass_min=932.54017&mass_max=932.54576	437.713	75.569	115.534	29.9551	55.0195	51.1264	134.949	220.271	95.9939	175.12	445.381	279.333	1084.42	294.442
PI(44:10)		957.55	7.8141		15.43	1.75086e-06	0.00115381	2.62835	0.868819	1	12.1209	5.46116e-06	0.00331618	1.13687	0.999967	1	3.54073	0.413255	1	9.55982	25.1266	115.874	10.8682	33.8488	-0.145795	Negative_normalized on PE	C53H83O13P1	957.55	M958T469	957.549	957.551	7.7732	7.8356	2.54232e+06	http://metlin.scripps.edu/metabo_list.php?mass_min=958.55518&mass_max=958.56092	28.596	6.61309	11.7411	0.808449	3.34506	3.5881	12.227	32.2557	16.3578	26.7662	123.127	46.1543	194.392	89.283
PI(44:11)		955.535	7.7971		18.8498	2.94524e-07	0.000194091	3.45002	0.783551	1	16.6551	1.20829e-07	5.90795e-05	1.67638	0.993033	1	4.4877	0.33708	1	1.24667	4.30106	20.7635	2.0899	5.5947	-0.188031	Negative_normalized on PE	C53H81O13P1	955.534	M956T468	955.534	955.535	7.7511	7.8365	441677	http://metlin.scripps.edu/metabo_list.php?mass_min=956.53958&mass_max=956.54531	1.78872	1.16327	0.329623	0	0	1.39722	4.0479	6.51282	1.42653	4.96383	23.6611	10.3467	36.9752	14.5969
PI(44:5)		967.629	7.8134		8.90758	0.000129448	0.0853061	0.733593	0.999834	1	9.02902	0.00018046	0.100438	0.56667	0.996967	1	2.73705	0.72251	1	4.23432	3.10627	38.2318	2.39946	11.5895	-0.257626	Negative_normalized on PE	C53H93O13P1	967.628	M968T469	967.626	967.629	7.7899	7.8592	750731	http://metlin.scripps.edu/metabo_list.php?mass_min=968.63351&mass_max=968.63931	3.86741	4.48224	4.99806	0	13.4839	0.547815	2.26081	4.75483	0.94173	3.62225	34.2599	12.2295	28.3929	33.5565
PI(44:6)		965.613	7.8235		10.8897	2.98459e-05	0.0196684	8.85422	0.998576	1	155.399	4.21149e-05	0.0192659	0.754446	1	1	77.4393	0.0514629	1	0.225352	1.99532	35.0195	0.170016	17.4511	-0.786392	Negative_normalized on PE	C53H91O13P1	965.612	M966T469	965.613	965.614	7.7916	7.8507	702115	http://metlin.scripps.edu/metabo_list.php?mass_min=966.61838&mass_max=966.62417	0.907242	0.395618	0	0	0.274607	0	0	4.48818	0.487513	1.01026	28.8691	14.4322	35.7166	52.729
PI(44:7)		963.598	7.8087		15.5228	1.66233e-06	0.00109548	8.19504	0.996544	1	136.734	8.32424e-07	0.000940331	1.60174	0.999999	1	62.3134	0.0288674	1	0.277579	2.27477	37.9544	0.444608	17.2969	-0.912637	Negative_normalized on PE	C53H89O13P1	963.597	M964T469	963.597	963.598	7.7732	7.843	754492	http://metlin.scripps.edu/metabo_list.php?mass_min=964.60285&mass_max=964.60863	0	0	0.407549	0.654621	0	0.255823	0.625062	6.08046	0	0.743856	26.5848	18.3373	56.0528	34.3631
PI(44:8)		961.582	7.811		7.89886	0.000292682	0.192878	7.77944	0.974391	1	55.9015	0.000211751	0.1071	2.48573	0.999797	1	17.7679	0.44581	1	1.82229	14.1764	101.869	4.52971	32.3781	-0.696226	Negative_normalized on PE	C53H87O13P1	961.581	M962T469	961.581	961.583	7.7732	7.9138	1.95946e+06	http://metlin.scripps.edu/metabo_list.php?mass_min=962.58699&mass_max=962.59276	4.71542	2.00574	2.03858	1.02884	0	0	2.96742	23.2915	6.04633	13.1913	84.0987	35.8716	206.631	48.9082
PI(44:9)		959.566	7.8177		10.9743	2.81346e-05	0.0185407	4.21864	0.882124	1	20.4316	1.77793e-05	0.0125101	1.47527	0.999735	1	7.37785	0.2445	1	8.7695	36.9954	179.175	12.9374	64.7001	-0.687334	Negative_normalized on PE	C53H85O13P1	959.566	M960T469	959.566	959.567	7.7732	7.8347	4.00713e+06	http://metlin.scripps.edu/metabo_list.php?mass_min=960.57134&mass_max=960.5771	25.2869	6.64329	8.29941	0.980093	1.78827	1.96809	16.4205	53.3006	22.1957	35.4898	193.275	79.3936	318.845	88.0942
PS(28:0)		678.436	8.4375		1	1	1	1	1	1	1	1	1	1	1	1	1	1	1	5000	5000	5000	5000	5000	-0.00299232	Negative_normalized on PS	C34H66O10P1N1	678.435	M678T506	678.436	678.436	8.3826	8.4613	2.05144e+09	http://metlin.scripps.edu/metabo_list.php?mass_min=679.44148&mass_max=679.44555	5000	5000	5000	5000	5000	5000	5000	5000	5000	5000	5000	5000	5000	5000
PS(30:0)		706.467	8.406		2.79196	0.0480653	31.675	0.778742	0.215547	1	1.05387	0.941062	1	0.822351	0.190686	1	1.0176	0.999202	1	4.66506	3.63288	4.91639	3.83632	4.74717	-0.413186	Negative_normalized on PS	C36H70O10P1N1	706.466	M706T504	706.467	706.468	8.3684	8.4431	1.83966e+06	http://metlin.scripps.edu/metabo_list.php?mass_min=707.473&mass_max=707.47723	4.9556	4.9274	3.83062	4.39874	5.77657	4.79225	3.97427	3.55349	3.98658	3.35857	5.40127	4.85341	4.65071	5.56822
PS(31:0)		720.483	8.3743		1.82656	0.155246	102.307	0.516234	0.520617	1	1.12067	0.981977	1	0.542794	0.347104	1	1.13949	0.973762	1	1.51962	0.784481	1.703	0.824841	1.7316	-0.04419	Negative_normalized on PS	C37H72O10P1N1	720.482	M720T502	720.482	720.483	8.328	8.477	591294	http://metlin.scripps.edu/metabo_list.php?mass_min=721.48833&mass_max=721.49266	2.34671	1.46523	1.74661	1.36482	1.33858	1.02415	1.35126	0.983715	0.819057	0.55067	2.03379	1.15945	1.87237	1.50273
PS(32:0)		734.499	8.3559		1.36568	0.274092	180.626	0.491113	0.349822	1	1.13593	0.954401	1	0.776433	0.791137	1	1.05816	0.998302	1	30.4325	14.9458	34.5693	23.6288	32.2025	-0.506161	Negative_normalized on PS	C38H74O10P1N1	734.498	M734T501	734.499	734.499	8.2989	8.4067	1.17922e+07	http://metlin.scripps.edu/metabo_list.php?mass_min=735.50429&mass_max=735.5087	37.4711	35.7678	30.4307	27.2756	36.2539	26.8694	18.9589	14.8598	16.9821	12.9955	41.9111	31.4988	25.3465	34.9082
PS(32:1)		732.483	8.3341		2.25827	0.0913572	60.2044	0.443755	0.0726753	1	0.59621	0.0999606	1	0.849883	0.821659	1	0.853726	0.851883	1	23.9952	10.648	14.3062	20.3931	20.4854	-0.56225	Negative_normalized on PS	C38H72O10P1N1	732.482	M732T500	732.483	732.483	8.2805	8.3634	7.89978e+06	http://metlin.scripps.edu/metabo_list.php?mass_min=733.48868&mass_max=733.49308	40.0404	18.3625	22.13	18.5208	36.8826	9.58498	22.4455	9.98783	12.9249	9.03123	15.1247	11.402	21.5436	14.9942
PS(33:0)		748.514	8.3351		1.32042	0.289708	190.917	0.439257	0.25109	1	1.11035	0.976016	1	0.8074	0.852053	1	0.925267	0.995118	1	16.068	7.05798	17.8411	12.9733	14.8672	-0.229401	Negative_normalized on PS	C39H76O10P1N1	748.513	M749T500	748.513	748.514	8.1779	8.3773	6.12462e+06	http://metlin.scripps.edu/metabo_list.php?mass_min=749.51969&mass_max=749.52418	12.2021	22.716	19.4909	13.5602	15.1257	19.393	9.98815	7.95405	6.45107	6.76883	22.8462	19.1868	11.0896	15.8506
PS(33:1)		746.499	8.3142		3.56217	0.0197144	12.9918	0.502767	0.0161991	1	0.706346	0.0847439	1	0.918699	0.917859	1	0.955785	0.991597	1	26.2565	13.2009	18.5461	24.1218	25.0955	-0.8999	Negative_normalized on PS	C39H74O10P1N1	746.498	M746T499	746.499	746.499	8.2719	8.3411	9.51103e+06	http://metlin.scripps.edu/metabo_list.php?mass_min=747.50455&mass_max=747.50903	35.3473	24.9671	27.1902	20.9874	32.9697	17.0398	25.2938	13.3711	13.7236	12.508	20.2621	17.8243	26.2497	17.5492
PS(34:0)		762.53	8.3221		1.23728	0.320607	211.28	0.323456	0.267134	1	1.0961	0.993297	1	0.721412	0.770677	1	0.827306	0.951996	1	115.119	37.2359	126.182	83.0483	95.2387	-0.198872	Negative_normalized on PS	C40H78O10P1N1	762.529	M763T499	762.529	762.53	8.2623	8.3478	4.13792e+07	http://metlin.scripps.edu/metabo_list.php?mass_min=763.53528&mass_max=763.53986	65.0622	163.827	157.302	88.5308	84.356	187.648	59.1076	42.719	34.6313	34.3575	180.804	111.197	43.5981	108.592
PS(34:1)		760.514	8.2851		3.62741	0.0183195	12.0726	0.533025	0.00984213	1	0.787712	0.190837	1	0.954671	0.982708	1	0.960561	0.991065	1	792.748	422.554	624.457	756.813	761.483	-0.225782	Negative_normalized on PS	C40H76O10P1N1	760.513	M761T497_1	760.514	760.514	8.2531	8.3142	2.93655e+08	http://metlin.scripps.edu/metabo_list.php?mass_min=761.51966&mass_max=761.52422	1042.09	718.146	799.655	659.267	1004.14	536.522	789.414	451.185	417.342	399.136	725.115	567.455	792.678	603.027
PS(34:2)		758.499	8.2776		5.05303	0.00400246	2.63762	0.439649	0.00711512	1	0.576913	0.0087863	1	0.910154	0.892957	1	0.848962	0.625452	1	54.5422	23.9794	31.4661	49.6418	46.3043	-0.582433	Negative_normalized on PS	C40H74O10P1N1	758.498	M758T497	758.499	758.499	8.2531	8.3016	1.86047e+07	http://metlin.scripps.edu/metabo_list.php?mass_min=759.50428&mass_max=759.50883	67.5581	54.5898	60.6251	41.7401	66.1716	38.235	52.8759	25.2623	25.7599	20.9161	38.7607	34.9764	33.7737	32.8019
PS(34:3)		756.482	8.2675		9.85081	6.30678e-05	0.0415617	0.485018	0.218594	1	0.196044	0.00323106	1	1.33804	0.350568	1	0.330708	0.0198745	1	3.18612	1.54533	0.624621	4.26315	1.05368	0.275171	Negative_normalized on PS	C40H72O10P1N1	756.482	M756T496	756.482	756.484	8.1793	8.316	977131	http://metlin.scripps.edu/metabo_list.php?mass_min=757.48799&mass_max=757.49253	7.1955	1.53994	4.42319	0.566936	3.77542	2.02467	2.77721	1.51509	1.87488	1.24601	0.631026	0.816165	0.868367	0.714264
PS(35:0)		776.546	8.3025		3.46741	0.021945	14.4617	1.97018	0.540373	1	1.43523	0.880459	1	2.94401	0.0100876	1	1.16097	0.996923	1	11.9165	23.4777	17.103	35.0824	13.8347	-0.890588	Negative_normalized on PS	C41H80O10P1N1	776.545	M777T498	776.546	776.546	8.2531	8.3275	8.00732e+06	http://metlin.scripps.edu/metabo_list.php?mass_min=777.55143&mass_max=777.55608	49.841	5.81145	5.08574	4.16927	2.10353	12.7092	3.69558	26.746	20.0045	23.6825	8.83896	27.6393	33.4106	29.3865
PS(35:1)		774.53	8.2669		6.69656	0.000831064	0.547671	0.594862	0.000456951	0.325186	0.821404	0.0561557	1	0.99289	0.999925	1	0.901916	0.49099	1	457.631	272.227	375.9	454.377	412.745	-0.531479	Negative_normalized on PS	C41H78O10P1N1	774.529	M775T496	774.53	774.53	8.2161	8.2832	1.72001e+08	http://metlin.scripps.edu/metabo_list.php?mass_min=775.53551&mass_max=775.54016	551.998	437.586	470.841	432.489	506.187	345.198	459.118	313.61	228.637	274.434	497.621	357.806	425.99	347.297
PS(35:2)		772.515	8.2449		5.26623	0.00323028	2.12875	0.48724	0.00372895	1	0.755443	0.100884	1	0.968571	0.995328	1	1.02001	0.999304	1	30.8155	15.0145	23.2794	29.847	31.4322	-1.23196	Negative_normalized on PS	C41H76O10P1N1	772.513	M773T495	772.515	772.515	8.1793	8.2731	1.18146e+07	http://metlin.scripps.edu/metabo_list.php?mass_min=773.5204&mass_max=773.52503	35.038	31.3836	33.8267	26.3212	33.703	25.0745	30.3615	16.0243	14.5666	14.4527	31.1758	27.3482	25.9833	22.3827
PS(36:1)		788.546	8.2358		5.7928	0.00192882	1.27109	0.673913	0.00908662	1	0.809422	0.0604328	1	1.03409	0.976648	1	0.805381	0.0670834	1	8581.3	5783.05	6945.89	8873.87	6911.21	-0.382454	Negative_normalized on PS	C42H80O10P1N1	788.545	M789T494	788.545	788.546	8.1606	8.2591	3.18791e+09	http://metlin.scripps.edu/metabo_list.php?mass_min=789.55101&mass_max=789.55574	10659.4	7821.08	8850.57	8490.78	9200.99	6587.47	8458.79	6456.46	4590.02	6302.68	9435.76	6032.04	8019.19	6313.53
PS(36:2)		786.53	8.2123		6.0139	0.00156211	1.02943	0.553022	0.00115155	0.738729	0.853726	0.265513	1	1.01425	0.999417	1	0.998019	1	1	1074.69	594.33	917.495	1090.01	1072.57	-0.612369	Negative_normalized on PS	C42H78O10P1N1	786.529	M787T493	786.53	786.53	8.1606	8.2486	4.18978e+08	http://metlin.scripps.edu/metabo_list.php?mass_min=787.53554&mass_max=787.54026	1242.79	1066.54	1122.47	1063.63	1157.76	794.355	1075.31	638.956	537.743	606.29	1184.79	1043.93	806.283	948.944
PS(36:3)		784.515	8.1914		4.65989	0.00599474	3.95054	0.57673	0.0589707	1	0.749664	0.194353	1	1.17744	0.476771	1	0.984529	0.999879	1	65.6603	37.8683	49.2232	77.3108	64.6445	-1.12389	Negative_normalized on PS	C42H76O10P1N1	784.513	M785T491	784.515	784.515	8.1039	8.231	2.61143e+07	http://metlin.scripps.edu/metabo_list.php?mass_min=785.5203&mass_max=785.52501	96.6974	60.0775	70.6711	52.7967	75.467	39.0864	64.8264	41.3526	33.937	38.3153	59.8525	58.3817	52.475	44.027
PS(36:4)		782.499	8.1713		1.363	0.274994	181.221	0.303473	0.185238	1	0.679292	0.613742	1	0.96367	0.99979	1	0.967268	0.999881	1	28.0072	8.49943	19.0251	26.9897	27.0905	-1.26745	Negative_normalized on PS	C42H74O10P1N1	782.498	M782T490	782.499	782.5	8.0854	8.1919	1.01859e+07	http://metlin.scripps.edu/metabo_list.php?mass_min=783.50476&mass_max=783.50946	76.8734	12.9456	18.7472	22.6548	32.538	10.6082	21.6832	9.73108	7.33352	8.4337	29.1643	15.2471	26.9832	13.2983
PS(37:1)		802.561	8.2037		2.42123	0.0749493	49.3916	0.617135	0.0433585	1	1.02648	0.997859	1	0.982204	0.999547	1	0.898745	0.804525	1	150.52	92.8914	154.505	147.842	135.279	-0.126493	Negative_normalized on PS	C43H82O10P1N1	802.56	M803T492	802.561	802.561	8.1534	8.2276	5.96669e+07	http://metlin.scripps.edu/metabo_list.php?mass_min=803.56641&mass_max=803.57123	161.625	124.451	118.88	170.849	145.851	204.291	127.694	103.652	70.4663	104.556	228.584	120.012	154.3	181.595
PS(37:2)		800.546	8.1773		3.17129	0.0308149	20.3071	0.546179	0.00749244	1	0.884457	0.644132	1	0.870113	0.549152	1	0.952948	0.978838	1	62.4702	34.1199	55.2522	54.3562	59.5308	-0.301772	Negative_normalized on PS	C43H80O10P1N1	800.545	M801T491	800.545	800.546	8.0854	8.2041	2.36512e+07	http://metlin.scripps.edu/metabo_list.php?mass_min=801.55091&mass_max=801.55571	65.3815	57.1706	44.5819	71.4045	58.3306	82.2747	58.1475	39.3165	25.6131	37.43	83.8904	48.5946	36.9966	67.72
PS(37:3)		798.53	8.1671		2.49923	0.068211	44.9511	0.754645	0.518119	1	0.714235	0.183712	1	1.12774	0.803459	1	0.886927	0.875882	1	30.4282	22.9625	21.7328	34.3149	26.9876	-0.427844	Negative_normalized on PS	C43H78O10P1N1	798.529	M799T490	798.529	798.53	8.1052	8.2083	1.17084e+07	http://metlin.scripps.edu/metabo_list.php?mass_min=799.53536&mass_max=799.54015	43.8157	23.045	27.7712	30.0945	35.8165	22.4974	29.9569	29.5828	16.7876	22.517	24.0633	18.3406	29.1488	15.5595
PS(37:4)		796.514	8.1223		1.89631	0.142442	93.8692	0.443123	0.396483	1	0.838495	0.949752	1	1.36798	0.535431	1	1.13988	0.973408	1	23.8543	10.5704	20.0017	32.6322	27.1911	-0.328569	Negative_normalized on PS	C43H76O10P1N1	796.513	M797T487	796.514	796.515	8.067	8.1958	1.0649e+07	http://metlin.scripps.edu/metabo_list.php?mass_min=797.51964&mass_max=797.52442	60.7273	15.3285	23.4187	16.4793	21.274	12.8286	16.9234	12.3636	6.17762	13.1698	25.0307	19.9202	35.6081	7.69423
PS(38:1)		816.577	8.1737		16.1323	1.1888e-06	0.00078342	0.365919	3.44066e-06	0.00152177	0.554928	1.13339e-05	0.00729213	0.741744	0.00875567	1	0.511996	6.97247e-06	0.00273429	275.047	100.645	152.632	204.015	140.823	-0.234459	Negative_normalized on PS	C44H84O10P1N1	816.576	M817T490	816.576	816.577	8.0854	8.2134	7.74065e+07	http://metlin.scripps.edu/metabo_list.php?mass_min=817.58211&mass_max=817.58701	310.044	209.955	246.84	325.818	308.887	275.369	248.419	112.925	74.3084	114.702	234.347	122.396	163.111	152.007
PS(38:2)		814.561	8.1535		4.55506	0.00668957	4.40843	0.465467	0.00122537	0.946382	0.765483	0.0897526	1	0.757043	0.0752916	1	0.777692	0.136105	1	305.941	142.405	234.192	231.61	237.928	-0.0632465	Negative_normalized on PS	C44H82O10P1N1	814.56	M815T489	814.561	814.561	8.0854	8.1958	1.02966e+08	http://metlin.scripps.edu/metabo_list.php?mass_min=815.56632&mass_max=815.57121	334.214	263.048	220.675	394.598	276.386	373.682	278.981	182.939	95.8961	148.381	384.747	207.727	167.216	215.251
PS(38:3)		812.545	8.1356		2.81765	0.0466239	30.7251	0.854538	0.760502	1	0.740465	0.121393	1	1.07557	0.924825	1	0.78364	0.268772	1	1364.37	1165.91	1010.27	1467.48	1069.17	-0.0880961	Negative_normalized on PS	C44H80O10P1N1	812.545	M813T488	812.545	812.546	8.0854	8.1733	4.9744e+08	http://metlin.scripps.edu/metabo_list.php?mass_min=813.5507&mass_max=813.55557	1833.07	1034.97	1178.2	1427.44	1584.46	1064.65	1427.8	1328	812.935	1356.78	938.1	738.94	1229.27	781.212
PS(38:4)		810.53	8.1025		2.13491	0.106224	70.0016	0.496421	0.623073	1	0.997895	1	1	1.65445	0.194772	1	1.1872	0.958579	1	1074.69	533.5	1072.43	1778.03	1275.88	-0.347484	Negative_normalized on PS	C44H78O10P1N1	810.529	M811T486	810.53	810.53	8.067	8.1531	5.25292e+08	http://metlin.scripps.edu/metabo_list.php?mass_min=811.53527&mass_max=811.54013	2827.97	655.205	1184.67	709.835	830.003	482.961	832.208	635.823	366.336	598.341	1079.31	1235.61	2079.39	475.019
PS(38:5)		808.515	8.0905		5.33901	0.00300459	1.98002	0.303491	0.061408	1	0.466623	0.0653314	1	1.23035	0.677284	1	0.563694	0.187968	1	180.804	54.8723	84.3672	222.452	101.918	-0.880269	Negative_normalized on PS	C44H76O10P1N1	808.513	M809T485	808.514	808.515	8.0475	8.1376	5.82899e+07	http://metlin.scripps.edu/metabo_list.php?mass_min=809.52006&mass_max=809.52491	389.906	112.164	171.863	167.912	213.651	84.713	125.417	52.592	49.6472	62.3778	102.44	94.8124	105.757	68.8276
PS(38:6)		806.499	8.1023		1.76985	0.166511	109.73	0.381694	0.224496	1	0.524274	0.229389	1	0.81613	0.89275	1	0.436967	0.144128	1	124.909	47.6771	65.4866	101.942	54.5812	-0.882549	Negative_normalized on PS	C44H74O10P1N1	806.498	M806T486	806.499	806.499	8.067	8.1531	3.22216e+07	http://metlin.scripps.edu/metabo_list.php?mass_min=807.50441&mass_max=807.50925	251.122	48.0665	65.4469	132.532	222.14	55.3649	99.6928	41.5163	49.6711	51.8438	84.5361	31.676	56.6844	90.7955
PS(39:1)		830.593	8.1539		9.11441	0.000110183	0.0726107	0.438566	0.00306383	1	0.472013	0.000341696	0.241086	0.927561	0.926209	1	0.56765	0.00443944	1	35.3223	15.4911	16.6726	32.7636	20.0507	-0.916683	Negative_normalized on PS	C45H86O10P1N1	830.592	M831T489	830.593	830.593	8.0854	8.1911	1.07929e+07	http://metlin.scripps.edu/metabo_list.php?mass_min=831.59829&mass_max=831.60327	44.3182	28.7136	28.8232	42.5971	33.4632	35.7051	33.6359	14.9576	14.6136	16.9022	27.0959	14.2706	16.4573	16.8931
PS(39:2)		828.577	8.1317		9.6247	7.46621e-05	0.0492023	0.421399	0.000296844	0.171814	0.505049	7.51845e-05	0.0707505	0.708692	0.0178199	1	0.571429	0.000841732	0.527067	57.0302	24.0325	28.803	40.4168	32.5887	-0.737957	Negative_normalized on PS	C45H84O10P1N1	828.576	M829T488	828.577	828.577	8.0854	8.1733	1.63704e+07	http://metlin.scripps.edu/metabo_list.php?mass_min=829.5825&mass_max=829.58747	60.7009	48.5373	36.0338	75.8649	55.6001	70.2098	52.2647	28.3122	16.2945	27.4906	47.217	22.1896	29.4566	33.6191
PS(39:3)		826.562	8.1025		1.83951	0.152784	100.684	0.776704	0.448058	1	1.1878	0.375864	1	1.02958	0.997731	1	1.07482	0.941481	1	62.447	48.5028	74.1746	64.2942	67.1196	-0.800326	Negative_normalized on PS	C45H82O10P1N1	826.56	M827T486	826.561	826.562	8.067	8.1376	2.68972e+07	http://metlin.scripps.edu/metabo_list.php?mass_min=827.5669&mass_max=827.57186	83.8465	49.9114	44.9564	63.4805	63.4537	76.3691	55.1115	57.0327	33.015	55.4607	87.383	52.1786	103.983	66.2587
PS(39:4)		824.546	8.0663		1.12656	0.366498	241.522	0.818232	0.907772	1	1.29627	0.441818	1	0.977867	0.99991	1	1.14184	0.91674	1	53.3191	43.6274	69.116	52.139	60.8819	-1.20258	Negative_normalized on PS	C45H80O10P1N1	824.545	M825T484	824.546	824.547	7.9021	8.1027	2.36272e+07	http://metlin.scripps.edu/metabo_list.php?mass_min=825.55159&mass_max=825.55653	67.6827	40.4802	38.9419	53.9182	51.662	94.6996	25.849	47.8548	31.6898	51.3374	72.229	53.568	102.732	57.6217
PS(39:5)		822.531	8.0745		2.57251	0.062455	41.1579	1.02503	0.999902	1	0.657948	0.198386	1	0.888367	0.927792	1	0.511601	0.0468449	1	43.5968	44.688	28.6845	38.73	22.3042	-1.29071	Negative_normalized on PS	C45H78O10P1N1	822.529	M823T484_1	822.53	822.531	8.0117	8.1355	1.35285e+07	http://metlin.scripps.edu/metabo_list.php?mass_min=823.53601&mass_max=823.54094	60.2886	37.9476	31.4646	48.7945	61.9435	35.0701	29.6689	48.155	33.4304	52.4784	26.0696	15.534	30.4403	26.5268
PS(39:6)		820.515	8.0673		3.48153	0.0215962	14.2319	0.721554	0.539098	1	0.483677	0.0181818	1	0.885247	0.907374	1	0.516361	0.0365202	1	73.7704	53.2293	35.6811	65.3051	38.0922	-0.903958	Negative_normalized on PS	C45H76O10P1N1	820.513	M821T484	820.515	820.515	8.0112	8.1107	2.0967e+07	http://metlin.scripps.edu/metabo_list.php?mass_min=821.52005&mass_max=821.52497	108.548	43.4426	39.5758	99.1123	102.751	63.3625	59.6005	49.6623	46.3693	63.6563	34.4061	15.4196	31.7838	43.9585
PS(40:1)		844.608	8.1194		16.6665	8.92436e-07	0.000588116	0.344106	2.97418e-05	0.0344099	0.414331	9.55178e-06	0.00275346	0.856065	0.372068	1	0.475972	4.14154e-05	0.0242271	377.763	129.99	156.519	323.389	179.804	0.0221096	Negative_normalized on PS	C46H88O10P1N1	844.607	M845T487	844.608	844.608	8.067	8.1556	1.04619e+08	http://metlin.scripps.edu/metabo_list.php?mass_min=845.61311&mass_max=845.61818	455.73	267.58	304.775	461.907	415.55	352.445	386.351	143.423	96.9861	149.562	252.638	142.164	139.058	163.14
PS(40:2)		842.592	8.1142		4.0246	0.0118036	7.7786	0.51783	0.0105706	1	0.664899	0.0235351	1	0.810976	0.311287	1	0.658103	0.0269032	1	299.714	155.201	199.28	243.061	197.243	0.0220865	Negative_normalized on PS	C46H86O10P1N1	842.592	M843T487	842.592	842.592	8.067	8.1531	9.62846e+07	http://metlin.scripps.edu/metabo_list.php?mass_min=843.59747&mass_max=843.60253	342.193	226.105	197.185	433.235	272.608	333.865	292.81	177.787	102.692	185.124	312.019	165.146	189.798	206.577
PS(40:3)		840.577	8.0846		4.79315	0.00522089	3.44056	0.536568	0.0309251	1	1.19835	0.36326	1	0.839536	0.54819	1	1.02597	0.999001	1	126.334	67.7868	151.392	106.062	129.614	0.0458565	Negative_normalized on PS	C46H84O10P1N1	840.576	M841T485	840.576	840.577	8.0294	8.1355	5.16456e+07	http://metlin.scripps.edu/metabo_list.php?mass_min=841.58181&mass_max=841.58685	162.767	102.215	82.02	131.778	104.515	187.08	113.963	81.3586	42.3161	79.6856	208.142	132.157	197.952	143.96
[truncated: 143 more rows]
[truncated: 16 more columns]
