# Supplementary material for: Functional characterisation of peroxisomal β-oxidation disorders in fibroblasts using lipidomics
Source: J Inherit Metab Dis. 2017 Aug 28;41(3):479–87. doi: 10.1007/s10545-017-0076-9 (PMC5959964; doi:10.1007/s10545-017-0076-9)
Supplement: Supplementary file 3 — (XLSX 56 kb) [file 10545_2017_76_MOESM3_ESM.xlsx]

## Sheet: (A) VIP score PLS-DA all groups
Phospholipid species	VIP.score
PC(36:6)	1.77851
PC(38:7)	1.76142
PC(32:2)	1.72676
PC(33:2)	1.71499
BMP(44:7)	1.71234
LPC(24:2)	1.7064
PC(36:5)	1.68183
PA(40:3)	1.67871
LPC(22:2)	1.67723
PE(32:2)	1.67336
PA(44:3)	1.66527
LPC(24:3)	1.66462
PC(32:1)	1.6622
PA(42:3)	1.66176
PE(O-37:5)	1.65682
LPC(30:0)	1.65548
PE(38:2)	1.65545
PC(38:6)	1.65167
LPC(26:5)	1.6482
PC(42:11)	1.64597
BMP(43:6)	1.64366
BMP(41:9)	1.643
LPC(26:2)	1.63821
BMP(44:8)	1.63522
BMP(44:9)	1.62912
PE(O-36:5)	1.62871
BMP(42:5)	1.62737
LPC(27:2)	1.62519
LPG(22:3)	1.6216
PC(34:3)	1.6202
PA(42:1)	1.60301
LPC(28:0)	1.59675
PC(37:5)	1.59511
PE(34:4)	1.59495
PC(31:1)	1.59321
PA(42:2)	1.58843
PE(O-44:3)	1.58751
PC(34:2)	1.58543
LPC(20:2)	1.58348
PC(O-43:5)	1.5831
LPC(26:1)	1.58297
BMP(43:7)	1.58249
PI(41:5)	1.58202
PE(44:2)	1.58186
PI(44:7)	1.57501
PC(40:9)	1.57145
PE(O-44:4)	1.56978
LPC(22:1)	1.56931
BMP(44:6)	1.56493
PC(38:5)	1.56289
PC(O-43:4)	1.56234
BMP(46:9)	1.56116
PI(42:7)	1.56105
LPC(22:4)	1.5565
LPC(24:4)	1.55237
BMP(42:11)	1.55205
LPI(20:5)	1.55031
PI(42:5)	1.54738
BMP(46:10)	1.54364
PA(42:4)	1.53964
BMP(43:11)	1.53866
PE(34:3)	1.53795
PE(32:1)	1.53116
PE(O-34:3)	1.52873
PC(40:10)	1.52556
PC(O-37:5)	1.52351
PC(35:3)	1.52276
PC(39:6)	1.52253
LPC(25:2)	1.51987
BMP(42:6)	1.51916
PI(40:4)	1.51901
SM(d38:1)	1.516
PI(44:11)	1.51503
LPC(20:1)	1.51424
PI(41:4)	1.51079
LPC(30:6)	1.51077
PA(40:4)	1.5055
BMP(40:8)	1.50242
PI(42:4)	1.50118
BMP(38:7)	1.50058
PE(37:5)	1.50051
LPC(26:3)	1.50041
PI(42:6)	1.49816
PI(44:6)	1.49682
PE(36:5)	1.49305
LPC(32:5)	1.49212
PE(O-39:6)	1.49166
PC(44:6)	1.49001
PA(40:2)	1.48917
BMP(44:10)	1.48803
PI(44:10)	1.48435
PC(O-35:3)	1.48264
PE(42:5)	1.48226
LPC(21:2)	1.47985
LPC(25:1)	1.4736
PS(40:1)	1.47344
PC(O-38:4)	1.47309
LPG(24:5)	1.47119
LPC(16:2)	1.46966
PC(48:9)	1.469
PI(41:6)	1.4683
LPC(32:6)	1.46817
PE(46:5)	1.46604
PC(39:7)	1.46599
BMP(46:8)	1.46334
SLBPA(62:10)	1.46313
PC(42:3)	1.46145
LPC(24:5)	1.46093
PI(44:9)	1.4602
LPC(26:0)	1.4578
PC(48:10)	1.45421
PA(44:1)	1.45358
PC(O-38:6)	1.45248
LPC(28:2)	1.4494
PC(42:4)	1.44876
LPC(34:0)	1.44692
SM(d40:1)	1.44196
BMP(40:9)	1.43986
CL2(72:9)	1.4388
PC(34:4)	1.43757
LPC(25:0)	1.43679
PE(O-44:2)	1.43567
LPC(24:1)	1.43294
PC(O-38:5)	1.43161
PC(O-42:4)	1.43014
PC(44:7)	1.42772
PC(46:9)	1.42307
PC(50:10)	1.42264
PE(36:6)	1.41982
PC(O-36:5)	1.41966
PE(O-44:1)	1.41744
PE(30:1)	1.41663
PC(48:11)	1.41517
PC(50:11)	1.41229
PE(42:6)	1.40987
LPC(28:1)	1.40969
PE(32:3)	1.40724
LPC(23:1)	1.40686
PS(46:7)	1.40425
PC(47:9)	1.40123
LPG(22:4)	1.39692
PC(44:5)	1.39583
BMP(36:4)	1.39571
PE(37:2)	1.39522
PS(34:3)	1.39519
PE(O-42:3)	1.39475
LPG(20:5)	1.39415
PI(41:7)	1.39345
CL2(70:8)	1.39164
PE(38:7)	1.39163
PE(O-37:6)	1.391
PE(O-40:7)	1.3901
BMP(40:7)	1.38455
SLBPA(56:8)	1.38439
PC(O-36:3)	1.38352
PC(48:8)	1.38278
PE(44:10)	1.38224
PC(O-45:5)	1.38081
PC(44:4)	1.38067
BMP(39:7)	1.3791
BMP(37:4)	1.37484
PC(O-41:3)	1.37475
LPC(23:2)	1.37103
PC(43:4)	1.36701
PC(41:0)	1.36625
PC(40:3)	1.36543
PC(41:1)	1.36537
PE(O-42:4)	1.36426
PE(46:9)	1.36364
PA(36:5)	1.3634
PS(39:1)	1.35999
LPG(20:2)	1.35722
PA(32:2)	1.35361
PC(O-44:5)	1.3514
PI(44:8)	1.35037
PC(O-42:5)	1.34741
LPC(26:4)	1.34719
PE(O-42:1)	1.34702
PC(43:3)	1.347
PC(35:2)	1.34563
PC(O-40:7)	1.34562
PC(43:2)	1.34481
PC(O-42:10)	1.34443
PI(42:3)	1.33973
PI(37:2)	1.33899
SLBPA(58:11)	1.33795
PE(O-38:6)	1.33778
PC(46:7)	1.33748
SLBPA(56:9)	1.33696
PE(O-44:5)	1.33626
PC(48:7)	1.32947
PC(44:3)	1.32809
PI(39:4)	1.32726
LPC(19:1)	1.32722
PC(46:10)	1.32629
PE(42:7)	1.32611
LPC(34:3)	1.32554
PC(50:9)	1.32533
PI(44:5)	1.3251
PC(O-42:3)	1.32257
PC(46:8)	1.32068
PC(40:0)	1.32037
PC(O-38:3)	1.31784
SLBPA(54:7)	1.31761
PE(O-33:2)	1.31365
PE(O-42:2)	1.30984
PC(42:5)	1.30651
PE(46:8)	1.30341
LPC(32:0)	1.30162
PS(43:3)	1.30159
SLBPA(64:13)	1.30049
PC(37:4)	1.29963
PE(44:8)	1.2992
PC(47:7)	1.29914
PC(40:1)	1.2986
PE(O-40:4)	1.29771
PC(42:2)	1.29707
SLBPA(60:13)	1.296
PC(O-40:6)	1.29556
PE(O-32:3)	1.29443
BMP(40:10)	1.29319
PE(O-46:6)	1.29247
PC(36:4)	1.29233
PS(42:4)	1.29188
PC(42:1)	1.28975
PC(46:6)	1.28891
CL2(68:7)	1.28884
PG(36:5)	1.28817
BMP(36:3)	1.2875
PE(38:6)	1.28616
PS(48:7)	1.28494
BMP(38:6)	1.28451
PC(30:1)	1.28384
PI(37:5)	1.28207
PE(44:9)	1.28155
PI(40:3)	1.28046
BMP(40:4)	1.27631
PC(41:2)	1.27457
CL1(70:8)	1.27333
CL1(72:9)	1.27079
PA(32:1)	1.26964
SLBPA(60:7)	1.26598
PC(O-34:0)	1.26396
PE(40:4)	1.26172
PE(46:10)	1.26129
SLBPA(58:9)	1.26119
PC(43:6)	1.26095
PC(52:4)	1.2588
PG(34:2)	1.25835
PC(41:3)	1.25631
PA(34:3)	1.25554
PE(39:7)	1.2551
BMP(42:10)	1.25456
PC(49:8)	1.25153
SM(d39:1)	1.25133
PC(41:4)	1.25055
LPI(22:4)	1.24807
PC(42:0)	1.24788
PC(45:5)	1.24626
PC(38:4)	1.24544
SLBPA(58:10)	1.24434
BMP(42:7)	1.24022
PE(48:9)	1.23812
PC(44:2)	1.23636
SLBPA(54:6)	1.23408
PC(O-36:4)	1.23208
PC(45:8)	1.23164
PG(38:2)	1.23161
PC(52:1)	1.22952
PC(50:8)	1.22932
PE(48:7)	1.22782
LPG(18:3)	1.22767
SM(d40:2)	1.22717
LPC(30:1)	1.22696
PS(38:1)	1.22529
PC(44:0)	1.22358
PE(48:6)	1.22328
LPG(20:1)	1.22258
PI(39:5)	1.21804
CL1(74:10)	1.21668
LPC(32:3)	1.21112
SM(d38:2)	1.20976
PC(50:1)	1.20955
PC(45:3)	1.20948
BMP(46:11)	1.20834
PC(O-44:4)	1.2077
PE(46:6)	1.20655
PE(34:2)	1.2045
PI(36:5)	1.20127
BMP(37:5)	1.20125
PI(42:8)	1.19989
PC(O-40:5)	1.19938
PE(44:1)	1.19735
MLCL2(58:7)	1.19732
PS(39:2)	1.19608
PE(46:4)	1.19582
PI(39:3)	1.19581
PS(40:6)	1.1902
PC(43:1)	1.18999
PI(38:2)	1.18828
PE(48:8)	1.18672
PC(54:6)	1.18633
PE(33:1)	1.18489
PC(48:6)	1.18436
PI(42:9)	1.18228
PS(40:7)	1.18001
PE(48:11)	1.17986
PC(49:4)	1.1798
SLBPA(54:4)	1.17977
PC(45:6)	1.17809
PC(O-35:4)	1.17651
PE(O-42:5)	1.17466
PC(40:2)	1.17429
PC(47:6)	1.17392
PC(33:1)	1.17288
PC(O-40:3)	1.17278
SM(d39:2)	1.17232
PC(48:12)	1.17157
BMP(42:9)	1.16794
LPG(16:1)	1.16574
SLBPA(52:3)	1.16417
PC(40:8)	1.16393
PI(40:5)	1.16377
PC(42:6)	1.16263
PC(52:6)	1.16239
PC(46:0)	1.15856
PC(44:8)	1.15765
PE(44:11)	1.15742
PC(O-32:1)	1.15656
PC(50:4)	1.15606
PC(52:3)	1.15355
PS(44:4)	1.15298
PE(O-34:5)	1.15047
BMP(38:5)	1.14787
PS(44:3)	1.14783
PC(52:5)	1.1469
CL2(70:6)	1.14601
PC(48:0)	1.14476
PS(41:4)	1.14207
PC(39:2)	1.13896
PE(42:8)	1.13846
PC(45:4)	1.13825
BMP(44:12)	1.13742
PS(39:6)	1.13703
SLBPA(60:12)	1.13463
SM(14:0)_OH	1.13275
PC(54:5)	1.13096
PC(52:11)	1.13035
PC(40:7)	1.13019
PC(48:1)	1.12655
PC(46:11)	1.12614
PI(35:3)	1.12579
BMP(40:5)	1.12526
BMP(38:4)	1.11879
PC(O-42:8)	1.11821
SLBPA(56:7)	1.11638
PI(34:3)	1.11582
PC(46:5)	1.10756
PS(44:5)	1.10579
PC(52:2)	1.10567
PC(45:2)	1.10557
LPC(26:6)	1.10519
PC(O-46:5)	1.10394
LPC(23:3)	1.10326
PC(54:10)	1.10143
PC(50:2)	1.09831
PC(O-46:6)	1.09362
PC(O-34:2)	1.09361
PC(46:3)	1.09312
LPC(30:2)	1.09303
PS(43:2)	1.09171
CL2(68:5)	1.09169
PC(54:1)	1.09082
SLBPA(64:14)	1.08458
PE(O-38:3)	1.08344
PS(44:2)	1.08265
LPC(24:6)	1.08229
PA(38:1)	1.0806
PC(50:6)	1.07851
PS(38:5)	1.07682
PI(37:1)	1.07211
PC(50:0)	1.07169
PC(52:8)	1.07097
PC(O-36:2)	1.06716
PC(54:7)	1.06699
LPC(24:0)	1.06628
PI(37:4)	1.06382
PC(52:7)	1.06352
PC(50:3)	1.06315
CL2(68:6)	1.06034
PC(45:7)	1.05783
CL2(69:7)	1.05578
PC(49:7)	1.04786
PC(46:1)	1.04692
LPG(17:1)	1.04539
BMP(43:8)	1.04517
PC(44:1)	1.04464
PC(50:12)	1.04421
PE(42:11)	1.04268
PA(38:4)	1.04103
PE(O-34:2)	1.0392
PC(42:7)	1.03903
LPG(18:2)	1.0348
PC(51:5)	1.03429
PE(35:3)	1.03397
PC(45:1)	1.03326
SLBPA(58:8)	1.03264
PC(46:12)	1.03221
CL1(68:6)	1.03094
LPE(22:6)	1.02937
BMP(36:2)	1.02828
SM(17:0)_OH	1.02599
PS(38:3)	1.0257
PC(48:4)	1.02401
PC(56:11)	1.02344
PC(O-34:1)	1.02311
PE(O-40:6)	1.01897
PE(48:12)	1.01785
SM(d44:3)	1.0164
PS(36:1)	1.01581
LPI(20:2)	1.01149
PE(O-31:1)	1.01026
LPC(27:0)	1.00835
PI(40:9)	1.00809
PC(44:9)	1.00672
PC(43:5)	1.00578
PC(42:10)	1.00518
PE(O-44:6)	1.00453
PE(48:10)	1.00044

## Sheet: (B) ACOX1 vs. CTRL
Phospholipid species	VIP.score
PC(36:6)	1.59884
LPC(30:6)	1.5808
LPC(32:5)	1.57032
LPC(28:1)	1.56875
PC(32:2)	1.56403
LPC(29:1)	1.56208
SM(12:0)_OH	1.55536
PC(38:7)	1.55296
BMP(43:11)	1.55007
LPC(28:0)	1.54668
LPC(26:0)	1.54354
PC(O-35:5)	1.54149
PC(34:3)	1.53991
PC(33:2)	1.53721
SM(d38:1)	1.53602
PC(36:5)	1.53405
LPC(30:1)	1.53396
LPC(24:3)	1.5209
LPC(30:0)	1.51811
PC(38:6)	1.51207
LPC(26:5)	1.51097
LPC(24:2)	1.50898
LPC(28:2)	1.50145
PA(42:1)	1.49892
LPC(32:3)	1.49807
PE(38:2)	1.49743
LPC(30:2)	1.49428
SM(d40:1)	1.48693
PA(40:3)	1.48374
PC(37:5)	1.48226
PC(O-43:5)	1.4816
CL2(72:9)	1.4797
PE(44:2)	1.47499
BMP(41:9)	1.47367
PC(O-43:4)	1.47134
PE(32:2)	1.47047
PC(42:11)	1.46975
BMP(44:7)	1.46842
PA(44:3)	1.46668
LPC(22:2)	1.46663
PE(O-37:5)	1.46427
PA(40:2)	1.46274
LPC(22:1)	1.4589
PE(O-36:5)	1.45534
PC(38:5)	1.45245
LPC(25:0)	1.45186
PS(40:1)	1.45184
PA(42:3)	1.44783
LPC(20:2)	1.44643
SM(d44:1)	1.4451
PC(O-37:5)	1.44466
PE(O-44:4)	1.44254
LPC(32:6)	1.44253
LPC(O-17:0)	1.44221
LPI(20:5)	1.4418
PS(39:1)	1.43548
BMP(43:7)	1.43436
BMP(44:9)	1.43269
LPC(23:2)	1.43015
BMP(37:4)	1.42624
CL1(74:10)	1.42378
PC(32:1)	1.42219
PE(O-44:3)	1.42126
BMP(44:8)	1.41741
LPC(21:2)	1.41717
LPC(26:1)	1.41506
PC(35:3)	1.41263
LPC(26:2)	1.40953
PE(O-40:7)	1.4085
PC(O-38:4)	1.40784
PC(34:2)	1.40762
LPC(24:5)	1.40655
PC(39:6)	1.40652
CL2(70:8)	1.40547
PI(41:5)	1.40478
LPC(20:1)	1.40329
PC(34:4)	1.40316
PI(44:11)	1.40222
CL1(72:9)	1.40185
BMP(43:6)	1.40047
PI(39:4)	1.39852
PC(O-36:4)	1.39744
PE(37:2)	1.39644
PS(38:1)	1.39537
BMP(38:7)	1.39477
LPG(22:3)	1.38869
BMP(39:7)	1.38868
PC(O-41:3)	1.38693
PC(O-38:5)	1.3858
LPC(27:2)	1.38352
PE(O-34:3)	1.38253
PA(36:5)	1.38154
PC(O-36:5)	1.38042
SM(d44:2)	1.37948
LPC(16:2)	1.37903
PC(39:7)	1.37719
BMP(42:11)	1.37715
PI(40:4)	1.37559
CL2(70:6)	1.37477
SLBPA(62:10)	1.37243
PA(32:1)	1.37209
PE(O-39:6)	1.37023
PA(42:2)	1.36554
PC(O-35:3)	1.36543
SM(d39:1)	1.36165
PC(31:1)	1.35907
BMP(42:5)	1.35891
PI(44:7)	1.35751
PI(42:5)	1.35372
PE(44:1)	1.35287
LPC(22:4)	1.35287
CL2(70:7)	1.35231
PC(48:9)	1.35218
PC(O-38:6)	1.34873
PE(34:4)	1.34588
BMP(44:10)	1.34488
PS(44:2)	1.34474
PS(46:4)	1.34424
BMP(46:9)	1.34416
PC(40:9)	1.34176
PE(O-42:4)	1.34043
PC(40:10)	1.34009
BMP(46:10)	1.33738
PI(42:7)	1.33709
CL2(72:8)	1.33696
LPC(34:0)	1.33502
PC(48:10)	1.33464
BMP(40:8)	1.33201
PE(O-33:2)	1.33128
MLCL2(58:7)	1.33107
PE(O-44:1)	1.33079
PA(32:2)	1.33045
PI(44:10)	1.33014
LPC(24:4)	1.32957
LPC(25:2)	1.32917
BMP(36:4)	1.32846
PC(30:1)	1.32738
PE(37:5)	1.32637
PE(O-44:2)	1.32522
PE(48:12)	1.32385
SM(d44:3)	1.32294
PE(34:5)	1.32203
PA(44:1)	1.32113
PC(48:8)	1.32042
LPC(34:3)	1.31896
PS(44:1)	1.31821
PE(32:1)	1.31644
PI(42:4)	1.31538
PE(O-36:6)	1.31528
PC(O-40:7)	1.31449
SM(d46:3)	1.31047
PE(O-46:6)	1.31026
PC(O-36:3)	1.30963
SLBPA(58:11)	1.30894
LPC(26:3)	1.30838
PI(42:6)	1.30747
PI(41:4)	1.30659
LPC(23:1)	1.3061
PC(44:0)	1.30552
PS(39:2)	1.30549
PC(42:4)	1.30411
PE(46:5)	1.30291
BMP(36:3)	1.30269
PE(34:3)	1.30211
CL1(68:6)	1.30114
PC(50:10)	1.30012
LPC(25:1)	1.30012
SLBPA(54:7)	1.29993
PI(44:6)	1.29909
PC(O-43:3)	1.29765
PE(36:5)	1.29738
PE(30:1)	1.29637
SM(d45:2)	1.29609
PE(O-44:5)	1.29581
SLBPA(56:8)	1.29552
PC(52:8)	1.29476
PI(41:6)	1.29439
PA(40:4)	1.2936
BMP(40:7)	1.29326
LPC(19:1)	1.29278
LPC(24:1)	1.29224
PC(46:9)	1.29199
PC(O-40:6)	1.28992
BMP(42:6)	1.28925
PC(44:5)	1.28848
PC(O-38:3)	1.28793
PC(52:5)	1.28709
PC(44:6)	1.28621
LPC(32:0)	1.28423
PI(37:2)	1.28285
PC(O-32:1)	1.28064
PC(46:8)	1.28017
BMP(44:6)	1.2801
PC(42:3)	1.27962
PC(44:4)	1.27936
LPI(20:4)	1.27839
PG(36:5)	1.2776
SLBPA(56:9)	1.27641
PC(47:9)	1.27633
PS(44:4)	1.27549
LPG(24:5)	1.27484
PC(37:4)	1.27469
CL1(70:8)	1.2728
CL1(71:7)	1.27226
PC(48:4)	1.27153
PC(O-42:4)	1.27079
BMP(46:8)	1.2706
PE(46:4)	1.26821
PE(O-37:6)	1.26737
LPG(17:1)	1.26478
PC(44:1)	1.26403
PC(50:4)	1.26397
LPC(O-18:0)	1.26109
LPC(26:6)	1.26058
SLBPA(54:4)	1.26001
PE(O-40:4)	1.25818
CL2(68:7)	1.25788
LPC(24:0)	1.25745
PC(46:7)	1.25648
PC(44:7)	1.2563
CL2(73:9)	1.25569
PE(48:6)	1.25514
PC(O-42:10)	1.25379
PC(48:5)	1.25265
PA(42:4)	1.25179
PC(50:9)	1.25168
PE(O-42:3)	1.25041
PC(46:1)	1.2503
PC(35:2)	1.24935
PI(44:9)	1.24772
PE(O-42:2)	1.24733
BMP(40:9)	1.24653
CL2(68:6)	1.24625
PC(41:1)	1.24275
PE(42:5)	1.24266
PE(O-42:1)	1.23932
LPG(20:2)	1.23759
PC(54:6)	1.23725
PC(46:4)	1.23499
PC(O-34:0)	1.23419
CL2(69:6)	1.23245
LPG(20:5)	1.23068
SM(d40:2)	1.23049
PC(42:0)	1.23044
PC(43:1)	1.23019
PC(48:3)	1.23011
PC(46:5)	1.22984
PC(48:7)	1.22958
PC(52:6)	1.22898
PC(O-40:5)	1.22875
BMP(40:10)	1.22851
PI(41:7)	1.22843
PC(42:1)	1.22809
PC(O-42:3)	1.22697
PS(34:2)	1.22601
PC(36:4)	1.22567
PC(43:4)	1.22489
PE(O-38:6)	1.2247
PC(47:5)	1.22466
PC(50:8)	1.22275
PC(52:4)	1.2216
PA(34:3)	1.22089
PC(41:0)	1.22088
PC(48:11)	1.22069
PE(42:6)	1.21974
PS(44:3)	1.21743
PG(34:2)	1.21732
PC(48:2)	1.21697
PC(47:4)	1.21662
PC(50:11)	1.21545
PS(43:3)	1.21534
PC(43:2)	1.21302
PS(42:4)	1.21223
SLBPA(54:6)	1.21206
PC(38:4)	1.21165
PC(54:5)	1.20992
PI(39:5)	1.20963
PC(45:1)	1.20947
PC(46:2)	1.20905
LPC(O-18:1)	1.20877
PC(40:0)	1.20839
LPC(34:5)	1.20836
PC(46:6)	1.20834
LPC(24:6)	1.2078
PC(47:7)	1.20763
LPE(22:6)	1.20746
PC(52:7)	1.20745
PC(49:4)	1.20726
PC(54:10)	1.20594
PS(44:5)	1.20569
SLBPA(58:10)	1.20549
PC(48:1)	1.20507
PC(45:4)	1.20505
PC(50:1)	1.2043
SLBPA(52:3)	1.20057
CL1(69:6)	1.20041
PC(40:3)	1.19838
PC(41:4)	1.19778
PC(45:5)	1.19739
PC(46:10)	1.19633
MLCL2(56:5)	1.19623
PC(46:0)	1.19441
SM(14:1)_OH	1.19315
LPC(30:5)	1.1917
PC(46:3)	1.19157
PC(49:5)	1.1905
CL2(71:7)	1.19024
PC(54:9)	1.18908
PE(48:7)	1.18895
PC(44:8)	1.18855
PE(36:6)	1.18838
BMP(38:6)	1.18812
LPG(22:4)	1.18683
PE(44:10)	1.18657
PC(48:6)	1.18415
PC(44:3)	1.18341
PE(46:10)	1.18223
PC(44:2)	1.18208
PC(45:2)	1.18125
PC(51:5)	1.17905
PC(O-42:5)	1.17784
CL2(68:5)	1.1769
PS(48:7)	1.17577
PC(50:3)	1.1753
PE(42:1)	1.17368
PC(43:3)	1.1719
PC(40:1)	1.1717
PS(46:7)	1.17137
PC(47:6)	1.17132
PC(52:3)	1.16977
SM(d46:2)	1.16869
PE(32:3)	1.16639
PS(40:7)	1.16134
PE(O-40:1)	1.16122
PC(56:10)	1.15967
LPC(O-17:1)	1.1589
PE(34:2)	1.15866
PE(O-42:5)	1.15798
PI(40:5)	1.15734
SM(d46:1)	1.15717
PA(34:2)	1.15696
PI(44:5)	1.15688
PS(43:2)	1.15567
PS(40:6)	1.15536
LPS(14:0)	1.15522
PC(49:8)	1.15355
PC(42:2)	1.15227
PE(46:6)	1.1517
PI(44:8)	1.15118
PC(42:5)	1.15056
PC(45:3)	1.1505
PC(O-44:5)	1.14951
BMP(40:4)	1.14896
PE(O-40:6)	1.14853
PE(46:9)	1.14786
PE(40:4)	1.14754
PC(41:2)	1.14716
PC(52:1)	1.14659
PC(45:8)	1.14619
BMP(37:5)	1.1456
PC(O-36:2)	1.14159
LPC(26:4)	1.14012
PC(O-45:5)	1.13881
SLBPA(64:13)	1.1383
CL2(74:10)	1.13653
BMP(38:4)	1.13577
SM(d38:2)	1.13489
PI(42:3)	1.13322
LPI(20:2)	1.13301
PC(54:8)	1.13217
PE(O-35:2)	1.13061
PC(50:6)	1.12809
PC(54:7)	1.1271
PC(50:2)	1.12621
PC(O-42:7)	1.12512
PC(45:6)	1.1242
PI(40:3)	1.12208
PC(45:7)	1.12129
PE(48:11)	1.1198
CL2(72:7)	1.11771
PC(O-34:2)	1.11733
PE(42:7)	1.11621
PE(O-34:2)	1.11552
PC(48:0)	1.1153
PI(38:2)	1.1152
SM(d43:1)	1.11263
PE(38:7)	1.11239
SLBPA(58:9)	1.11191
LPC(21:1)	1.11188
PC(O-34:1)	1.11067
BMP(36:2)	1.10994
LPC(23:0)	1.10533
LPC(27:1)	1.10512
CL2(71:6)	1.10413
PA(35:2)	1.10383
SLBPA(56:7)	1.10353
PE(44:9)	1.10205
LPC(19:2)	1.10153
SM(d39:2)	1.10084
SLBPA(60:13)	1.10083
BMP(43:8)	1.09951
SM(d43:3)	1.09855
PC(52:2)	1.09788
PC(43:6)	1.09774
PC(40:2)	1.09736
CL2FA(72:8)	1.09596
PE(44:8)	1.09432
BMP(46:11)	1.09404
PC(O-42:8)	1.09075
LPC(32:4)	1.09021
PE(39:7)	1.09015
PA(36:4)	1.086
PA(38:6)	1.08374
PE(O-38:3)	1.08342
LPG(16:1)	1.08261
SM(d43:2)	1.08187
PE(44:11)	1.07973
PI(37:1)	1.07967
PA(38:4)	1.07929
BMP(42:7)	1.07876
BMP(38:5)	1.07724
PE(38:6)	1.07688
PI(39:3)	1.07669
PC(54:1)	1.07588
PS(34:3)	1.07553
PE(O-44:6)	1.07379
LPG(20:1)	1.073
CL2(69:5)	1.07263
PE(46:8)	1.07181
LPG(18:2)	1.0718
CL1(73:8)	1.06621
PC(41:3)	1.0658
PS(43:1)	1.063
PA(38:1)	1.06281
MLCL2(52:5)	1.06196
PE(O-32:1)	1.06009
PS(39:6)	1.06003
CL2(69:7)	1.05724
MLCL1(52:5)	1.05116
PC(50:5)	1.05098
PI(42:9)	1.04756
BMP(40:5)	1.04612
PC(33:1)	1.04562
SLBPA(54:2)	1.04466
PC(51:6)	1.04369
CL2(67:4)	1.04153
PC(37:1)	1.04046
LPI(16:1)	1.03957
LPC(16:1)	1.03945
SLBPA(62:11)	1.03916
CL2(67:5)	1.03874
PE(48:9)	1.03839
LPI(22:4)	1.03783
SLBPA(54:3)	1.03549
LPC(27:0)	1.03548
LPG(18:1)	1.0348
PC(47:2)	1.03438
PE(O-39:4)	1.03393
PS(40:2)	1.03252
SLBPA(60:7)	1.03121
PC(44:9)	1.03002
PC(46:11)	1.02868
PA(34:1)	1.02618
PS(41:4)	1.02535
PC(O-44:4)	1.02424
PC(O-42:9)	1.02334
LPC(29:0)	1.02303
LPC(23:3)	1.01988
PC(42:8)	1.01762
BMP(42:10)	1.01759
PG(34:1)	1.01051
PC(52:11)	1.00987
CL2(74:9)	1.00906
PC(43:7)	1.00624
PI(42:8)	1.0044
PC(40:8)	1.00413
PC(42:6)	1.00392
LPC(22:5)	1.00389
MLCL2(54:3)	1.00247
PC(56:5)	1.00161
PC(42:7)	1.00067

## Sheet: (C) ALD vs. CTRL
Phospholipid species	VIP.score
LPC(29:1)	2.28235
PC(47:6)	2.20708
LPC(30:2)	2.16632
PS(44:1)	2.15749
PC(46:4)	2.12838
PE(44:2)	2.10111
PC(48:4)	2.09527
PC(48:5)	2.08794
PC(47:4)	2.07773
PE(46:4)	2.07649
PC(47:5)	2.0731
PC(49:5)	2.05008
PC(46:5)	2.0427
LPC(30:1)	2.03122
PE(46:5)	2.01921
PC(48:6)	2.0117
LPC(26:0)	2.00958
PC(46:0)	2.00601
LPC(32:3)	1.99747
PE(48:6)	1.98496
PC(43:1)	1.98081
LPC(28:1)	1.97631
SM(d46:1)	1.96895
PS(44:2)	1.96335
PC(44:0)	1.96075
PC(52:7)	1.94218
PC(56:11)	1.9405
PC(54:7)	1.93123
PC(50:4)	1.92366
PC(48:3)	1.90856
PC(52:5)	1.90744
PC(44:1)	1.89917
PC(48:7)	1.89769
PC(46:2)	1.89725
PE(O-38:2)	1.88734
PC(46:6)	1.88645
PC(52:6)	1.88491
PC(44:2)	1.88192
LPC(26:1)	1.87733
PC(52:8)	1.87256
PC(45:1)	1.86298
SM(d43:1)	1.84803
LPC(25:0)	1.83351
SM(d44:1)	1.8334
PS(43:1)	1.82846
PC(45:2)	1.82821
LPC(28:2)	1.82664
PC(45:4)	1.81553
SM(d46:2)	1.8103
PE(37:2)	1.78705
PC(45:5)	1.78682
SM(d45:2)	1.78535
SLBPA(62:11)	1.78329
PC(54:10)	1.78324
PC(42:0)	1.77876
PC(49:4)	1.77538
PC(54:8)	1.77282
MLCL1(54:6)	1.76998
SM(d44:2)	1.75908
PE(O-44:2)	1.75817
PE(O-36:2)	1.75729
LPC(28:0)	1.756
PC(46:1)	1.74941
PC(43:2)	1.74858
PC(46:3)	1.74681
CL1(71:7)	1.73956
LPC(32:5)	1.73513
PC(48:2)	1.73089
LPC(26:2)	1.71293
LPC(27:1)	1.70954
CL2(71:6)	1.70604
PC(56:10)	1.70558
PC(45:3)	1.69527
PC(44:3)	1.69072
PE(O-36:1)	1.68691
LPC(30:5)	1.68253
PC(47:2)	1.6814
PE(O-44:1)	1.67469
CL2(71:7)	1.67364
LPC(O-17:0)	1.66866
PE(48:8)	1.66847
CL2(70:6)	1.6452
SLBPA(60:9)	1.64368
PC(43:3)	1.62644
SM(d46:3)	1.62529
CL2(72:7)	1.62216
PE(44:1)	1.6204
LPC(25:1)	1.61859
LPC(O-18:0)	1.61819
SLBPA(60:11)	1.61005
CL2(72:8)	1.60925
CL2(70:7)	1.59964
MLCL2(54:6)	1.59605
SLBPA(60:12)	1.59431
PC(34:1)	1.59017
PC(42:1)	1.58922
LPC(30:0)	1.58787
LPS(26:0)	1.58513
LPC(O-18:1)	1.58311
PC(O-42:7)	1.57544
PC(O-37:5)	1.57437
PE(O-34:6)	1.574
SM(d44:3)	1.57328
SM(d45:1)	1.57157
PC(33:1)	1.56838
PS(46:4)	1.56355
SM(d43:2)	1.56344
PC(O-37:4)	1.55246
SLBPA(58:9)	1.55034
PC(O-38:5)	1.54821
PC(O-40:6)	1.54402
PE(O-38:1)	1.53756
PC(52:4)	1.53706
PC(O-42:0)	1.53684
PS(35:0)	1.53249
LPC(29:2)	1.53059
PC(O-46:4)	1.52642
SLBPA(62:10)	1.52015
CL2(69:6)	1.51752
PE(O-44:4)	1.51684
BMP(43:9)	1.51675
PS(38:1)	1.51357
PC(47:7)	1.50999
PC(41:0)	1.49921
PI(39:4)	1.4981
PC(54:6)	1.49777
PE(46:6)	1.49653
PS(43:2)	1.4956
PC(32:1)	1.49508
CL1(68:6)	1.49456
PC(O-38:4)	1.49391
PC(O-40:5)	1.49295
PA(33:0)	1.49167
PE(42:1)	1.49143
PC(O-36:1)	1.48975
SLBPA(62:12)	1.48816
PC(O-40:7)	1.48195
SLBPA(60:10)	1.47947
SM(d33:1)	1.47854
PC(51:5)	1.47565
PC(41:1)	1.4676
PA(44:1)	1.46194
SLBPA(60:8)	1.46145
PA(34:0)	1.46017
PC(O-38:3)	1.45752
LPC(O-26:0)	1.45683
PC(O-39:5)	1.45543
PA(30:0)	1.45383
PA(32:0)	1.45164
SLBPA(58:11)	1.44366
MLCL1(52:5)	1.44335
BMP(43:8)	1.44106
SM(d41:1)	1.43953
PC(48:1)	1.43941
SM(d33:2)	1.43763
PE(48:9)	1.43635
PC(O-38:6)	1.4362
LPS(14:0)	1.4351
PS(39:2)	1.43076
PC(O-37:3)	1.42471
PC(54:5)	1.4191
LPC(24:0)	1.4186
BMP(44:12)	1.4183
PC(42:2)	1.4169
BMP(43:7)	1.40735
PS(44:3)	1.40555
MLCL2(52:5)	1.40413
PS(31:0)	1.40219
PC(44:4)	1.39912
CL1(69:6)	1.39785
SLBPA(62:13)	1.3934
CL2(68:6)	1.39277
LPC(24:1)	1.38941
BMP(42:11)	1.38679
PC(O-36:2)	1.38081
PE(O-44:3)	1.37775
PE(O-35:1)	1.37517
PC(34:4)	1.37239
PA(34:1)	1.36924
PC(O-36:5)	1.36835
SM(d42:1)	1.36671
PG(35:1)	1.36513
PC(45:6)	1.36387
PC(O-40:0)	1.36376
PE(O-42:4)	1.35553
CL2(73:8)	1.35183
PE(O-36:3)	1.34956
PE(35:1)	1.34848
LPS(16:1)	1.34597
PC(54:9)	1.34383
SLBPA(58:10)	1.34235
CL1(73:8)	1.33833
PE(36:1)	1.33503
PC(51:6)	1.3345
PE(33:1)	1.33343
PE(O-35:2)	1.3319
BMP(42:7)	1.32691
BMP(40:4)	1.32665
PA(44:3)	1.32393
BMP(40:8)	1.32232
PC(35:1)	1.32139
PC(40:0)	1.31773
PE(40:4)	1.31769
CL2(68:5)	1.31677
PS(38:2)	1.31623
SLBPA(64:13)	1.31547
PE(48:7)	1.31344
PE(O-32:4)	1.3128
BMP(44:11)	1.30936
PC(O-36:3)	1.30932
BMP(44:10)	1.30672
PC(50:2)	1.30399
PC(O-36:4)	1.30108
PI(36:6)	1.29873
BMP(44:8)	1.28624
MLCL2(54:5)	1.28623
PC(34:0)	1.28146
PS(30:0)	1.28041
PA(32:1)	1.27991
PC(37:1)	1.27973
PS(48:6)	1.27929
SM(14:1)_OH	1.27866
PC(O-42:6)	1.27489
PE(O-39:4)	1.26973
BMP(40:10)	1.26841
BMP(44:7)	1.26697
SM(d34:1)	1.26573
PC(42:3)	1.26459
PC(31:1)	1.26444
PC(50:3)	1.26278
PG(36:2)	1.26038
SM(d39:1)	1.25928
PI(36:0)	1.25897
PC(O-42:8)	1.25746
BMP(44:9)	1.2518
SM(d31:1)	1.24908
LPC(27:2)	1.24394
PC(O-38:0)	1.24338
PE(O-34:4)	1.23979
PC(46:7)	1.23864
LPE(18:0)	1.23719
PE(36:2)	1.23639
CL2(67:5)	1.23519
CL2(73:9)	1.23441
SLBPA(60:13)	1.23202
PC(O-42:10)	1.2302
BMP(42:8)	1.22547
LPC(O-16:0)	1.22538
PC(41:2)	1.21996
BMP(42:6)	1.21476
LPC(26:4)	1.21451
PC(39:4)	1.21191
PC(O-40:4)	1.20768
PE(O-32:5)	1.20529
PE(O-40:4)	1.19691
PC(54:2)	1.19511
PC(48:8)	1.1941
PE(38:4)	1.18245
PC(O-44:2)	1.17725
CL2(69:5)	1.17553
CL1(66:5)	1.17314
LPC(23:0)	1.16942
PC(O-42:9)	1.15627
CL2(74:8)	1.15514
PC(41:4)	1.1497
PC(35:0)	1.14784
MLCL2(50:4)	1.14271
CL2(66:5)	1.13738
LPC(26:3)	1.1373
SM(d43:3)	1.13598
BMP(46:8)	1.13584
PE(O-40:3)	1.13287
PC(54:11)	1.13149
LPG(17:1)	1.12425
PC(44:5)	1.12387
SM(d37:1)	1.12313
PA(31:0)	1.12212
PC(36:1)	1.122
BMP(38:7)	1.11934
SLBPA(58:8)	1.11499
SM(d32:1)	1.11232
SM(d35:1)	1.11215
MLCL2(52:4)	1.1113
SLBPA(58:6)	1.10957
PG(38:2)	1.10551
CL2(68:7)	1.10481
PI(39:5)	1.10077
CL1(67:5)	1.09578
PG(34:1)	1.09308
LPC(25:2)	1.09276
LPC(24:2)	1.09028
PE(36:3)	1.08736
CL2FA(70:7)	1.07524
PI(39:7)	1.07451
PI(41:5)	1.0729
LPC(34:5)	1.07219
PA(39:4)	1.07187
PG(36:5)	1.0702
LPC(21:0)	1.06994
PC(34:2)	1.06981
PS(48:7)	1.06221
LPE(18:1)	1.05674
PA(36:2)	1.05188
SM(12:0)_OH	1.05102
PC(43:7)	1.04876
LPC(O-22:0)	1.04572
PE(O-40:7)	1.04415
PC(O-38:2)	1.04077
LPC(20:0)	1.03721
PS(44:6)	1.035
PA(38:3)	1.03459
MLCL2(53:4)	1.03351
PC(O-34:2)	1.03301
SM(d42:2)	1.03282
PI(34:3)	1.02824
LPC(21:2)	1.02733
PA(34:2)	1.024
PE(O-35:4)	1.02244
PI(37:6)	1.02144
PE(35:3)	1.02093
PE(O-29:0)	1.02035
MLCL2(54:3)	1.01957
LPC(20:2)	1.0193
SM(d34:2)	1.01249
PC(37:2)	1.01215
BMP(40:5)	1.00949
PG(35:2)	1.00699
CL2(64:4)	1.00527
PC(48:0)	1.00522
CL1(72:6)	1.00364
PG(34:2)	1.00344
PS(38:4)	1.00287
PS(44:4)	1.00229
SM(d45:3)	1.0014
SLBPA(52:0)	1.00121
BMP(40:9)	1.00001

## Sheet: (D) DBP vs. CTRL
Phospholipid species	VIP.score
PC(36:6)	1.76073
PC(38:6)	1.74246
PC(O-44:5)	1.74149
PC(O-35:5)	1.71821
BMP(42:5)	1.71008
PC(32:2)	1.7094
PC(O-43:5)	1.70305
PC(O-46:5)	1.70269
PC(38:7)	1.69791
BMP(42:6)	1.69053
PC(39:7)	1.67448
PC(O-42:4)	1.66329
PC(O-43:4)	1.66148
PC(39:6)	1.65867
BMP(44:6)	1.65857
PC(33:2)	1.64384
BMP(42:7)	1.64379
PC(34:3)	1.64369
PC(O-42:5)	1.63633
PC(O-44:4)	1.63404
PC(37:5)	1.626
PC(36:5)	1.61946
SM(d44:1)	1.61871
LPC(29:1)	1.61501
PC(O-46:6)	1.61501
SM(d44:2)	1.60721
BMP(44:7)	1.60048
LPC(29:0)	1.6001
SM(d45:2)	1.59677
PS(38:1)	1.59387
SM(d46:2)	1.58014
PA(42:2)	1.57766
SM(d46:3)	1.57456
PC(38:5)	1.57422
PE(O-44:3)	1.57149
BMP(43:6)	1.56536
BMP(40:4)	1.56521
LPC(24:2)	1.56401
BMP(41:9)	1.56113
PC(40:6)	1.55716
PS(40:1)	1.55644
PE(O-37:5)	1.55556
LPC(26:0)	1.55205
PS(46:4)	1.55186
LPC(22:2)	1.55025
PA(42:4)	1.54943
PE(46:5)	1.54665
PE(46:4)	1.54486
PS(48:6)	1.54476
SLBPA(60:7)	1.54437
PC(54:12)	1.5412
PE(44:2)	1.53977
PC(32:1)	1.5372
PC(O-37:4)	1.53357
BMP(43:7)	1.53154
PC(O-37:5)	1.53072
PC(O-42:3)	1.53063
LPC(25:0)	1.52915
PE(O-44:2)	1.52741
LPC(28:0)	1.52671
PA(44:1)	1.52651
LPC(24:3)	1.52302
LPG(22:3)	1.52107
LPC(26:1)	1.52074
LPC(28:1)	1.51789
SM(d40:1)	1.51559
PC(O-41:3)	1.51422
PE(O-36:5)	1.51348
PC(40:7)	1.51196
BMP(40:5)	1.51134
PA(42:1)	1.51013
LPC(32:5)	1.50921
PC(O-38:4)	1.50733
LPC(27:2)	1.50688
PC(34:2)	1.50421
PC(42:11)	1.49944
PE(44:1)	1.49792
LPC(26:2)	1.49755
PE(O-44:4)	1.49703
PS(44:1)	1.49148
LPC(25:1)	1.48964
SM(d44:3)	1.48525
BMP(43:11)	1.4826
LPC(25:2)	1.48016
LPC(30:2)	1.47969
PA(44:3)	1.47786
PS(44:2)	1.47523
LPC(32:6)	1.47346
SM(d38:1)	1.4706
PC(O-38:3)	1.46945
PI(44:9)	1.46885
BMP(44:8)	1.46699
PC(35:3)	1.46504
PC(35:2)	1.46467
PE(O-44:1)	1.46337
PA(42:3)	1.46234
LPC(28:2)	1.46216
BMP(46:10)	1.46194
BMP(44:9)	1.46103
CL2(70:8)	1.45989
LPC(24:1)	1.45879
LPC(30:0)	1.45763
PC(O-38:5)	1.45435
CL2(70:6)	1.44996
PS(39:1)	1.44832
PC(50:11)	1.44253
LPC(30:1)	1.44181
BMP(42:11)	1.44098
PC(40:10)	1.4401
PI(44:8)	1.43789
PC(44:12)	1.43667
LPC(32:3)	1.43341
LPC(26:3)	1.43297
PC(O-38:6)	1.42782
PC(O-45:5)	1.4268
BMP(46:9)	1.42652
PE(40:4)	1.4222
PE(O-34:3)	1.42216
LPC(24:4)	1.42107
PI(42:7)	1.42103
SLBPA(62:10)	1.41797
LPG(24:5)	1.41561
PC(O-40:3)	1.41207
PE(32:2)	1.41194
PG(36:5)	1.41178
SM(d46:1)	1.41157
LPG(20:2)	1.41129
PC(O-42:7)	1.41056
PC(O-40:7)	1.41054
PC(O-40:6)	1.41025
PC(40:9)	1.40851
PA(40:3)	1.40749
PA(36:5)	1.40678
BMP(44:10)	1.39838
PC(O-37:3)	1.39381
PC(O-40:5)	1.39276
PC(O-36:5)	1.38892
PI(41:5)	1.38838
PE(O-42:4)	1.38715
PC(48:11)	1.38394
BMP(43:8)	1.38141
PI(41:4)	1.37949
PE(48:8)	1.37949
LPC(20:2)	1.37752
PI(44:7)	1.37339
PC(O-35:3)	1.373
PE(42:5)	1.3716
PC(40:0)	1.37116
SLBPA(64:13)	1.36913
LPC(22:4)	1.36861
LPI(20:5)	1.36807
SM(d40:2)	1.36695
PE(O-33:2)	1.36535
PI(39:4)	1.35898
PE(O-36:6)	1.3556
LPC(22:1)	1.35547
PS(39:2)	1.35474
PC(O-44:6)	1.35142
CL2(71:6)	1.34929
PC(44:6)	1.34895
PC(41:1)	1.34868
PE(36:6)	1.34743
PE(30:1)	1.34577
BMP(46:11)	1.34276
PE(48:6)	1.33944
PS(40:5)	1.33527
PC(41:0)	1.33314
PE(38:2)	1.33292
PC(42:0)	1.33225
SLBPA(60:9)	1.33045
PC(54:11)	1.3292
SLBPA(58:11)	1.32896
PI(40:4)	1.32442
LPC(26:4)	1.3244
PC(41:2)	1.32417
LPG(22:4)	1.32356
PC(43:2)	1.32321
BMP(40:10)	1.32317
PC(O-36:3)	1.32124
LPC(26:5)	1.32086
PE(32:1)	1.31842
PC(O-36:1)	1.30968
PC(43:1)	1.30924
LPC(16:2)	1.30851
PS(43:1)	1.30791
PE(O-42:1)	1.30779
PG(38:2)	1.30478
PC(56:11)	1.30432
PS(46:7)	1.30325
PS(39:5)	1.30315
PC(44:2)	1.30303
LPC(20:1)	1.29454
PC(43:3)	1.29398
LPC(23:3)	1.29237
PC(42:2)	1.29187
LPC(24:0)	1.29081
PC(36:2)	1.29054
PC(45:2)	1.2891
PC(42:3)	1.28898
SM(d45:3)	1.2883
PE(46:9)	1.28764
PC(42:1)	1.28729
SM(d39:1)	1.28599
PC(50:10)	1.28336
SLBPA(60:8)	1.28312
PC(44:1)	1.28235
PS(43:2)	1.28177
PE(46:8)	1.27932
PE(42:7)	1.27904
PC(44:7)	1.27849
PC(31:1)	1.27759
LPS(14:0)	1.27621
MLCL2(56:5)	1.27547
PE(46:6)	1.27416
PE(32:3)	1.27001
PE(30:0)	1.26671
PE(44:8)	1.26587
PI(41:6)	1.26542
PC(O-34:0)	1.26455
LPI(22:4)	1.26392
PE(37:2)	1.26284
SM(d39:2)	1.2613
PI(42:4)	1.25952
CL2(73:9)	1.25514
LPG(20:5)	1.25455
PC(44:3)	1.25208
PI(44:10)	1.24996
PC(40:1)	1.24861
CL2(68:7)	1.2467
LPC(24:5)	1.24588
PC(43:6)	1.24448
PE(48:7)	1.24076
PE(48:9)	1.24001
PE(O-40:4)	1.23838
PA(32:2)	1.23104
PE(42:8)	1.22974
PC(O-42:10)	1.229
PS(44:4)	1.22759
PI(42:5)	1.22553
PE(O-39:6)	1.22463
PC(40:3)	1.22441
CL2(74:8)	1.22426
PC(O-40:4)	1.22163
PC(46:2)	1.22072
BMP(46:8)	1.21852
MLCL2(54:3)	1.21587
PE(44:9)	1.21568
PS(40:6)	1.21476
PC(45:3)	1.21449
LPG(20:1)	1.21404
LPC(29:2)	1.21376
PC(O-42:6)	1.21329
PI(32:2)	1.21305
PE(42:6)	1.21249
PI(44:6)	1.21182
PI(42:8)	1.21079
LPC(O-17:0)	1.20875
PI(41:7)	1.20745
SM(d38:2)	1.2066
PE(O-42:3)	1.20637
PC(O-42:8)	1.20615
PE(36:5)	1.20611
SLBPA(56:9)	1.20585
PC(O-36:2)	1.20459
PE(44:10)	1.20348
PS(44:3)	1.20232
CL2(68:5)	1.20202
LPS(18:2)	1.20051
PC(40:5)	1.19955
PE(37:5)	1.1983
LPC(21:2)	1.19705
PA(40:4)	1.195
PC(48:10)	1.19455
PC(34:4)	1.19399
PI(42:6)	1.19357
PE(34:3)	1.19166
SM(d43:1)	1.19104
PS(48:7)	1.18878
PC(45:1)	1.18851
PC(48:9)	1.18757
SM(d35:1)	1.18584
LPE(22:6)	1.18438
PE(42:1)	1.18323
CL2(72:9)	1.18278
PE(O-37:6)	1.18231
PE(34:4)	1.18182
LPC(30:6)	1.17583
PC(44:0)	1.17458
CL2(72:7)	1.17424
PA(32:1)	1.17372
PC(46:3)	1.17184
PC(46:1)	1.16926
LPC(19:1)	1.16801
PE(O-40:7)	1.15991
PE(46:10)	1.15581
PC(42:4)	1.15475
PI(42:3)	1.15454
PC(42:5)	1.15376
LPC(34:0)	1.15259
LPC(27:1)	1.15207
PC(44:4)	1.15097
PS(36:1)	1.15043
LPC(32:0)	1.15015
CL2(68:6)	1.14821
LPC(34:5)	1.14786
PC(44:5)	1.14757
PC(48:7)	1.14331
PC(O-39:5)	1.14211
CL1(68:6)	1.13912
PC(39:2)	1.13768
PC(44:11)	1.13658
PC(48:12)	1.1362
PE(32:0)	1.13465
PS(40:2)	1.13463
PC(47:2)	1.13456
PC(42:10)	1.13355
BMP(40:9)	1.1309
PC(54:10)	1.13017
CL1(71:7)	1.1291
PC(38:4)	1.12611
CL2(69:5)	1.12572
LPC(O-18:0)	1.1195
MLCL2(50:3)	1.11569
PC(35:0)	1.11513
PI(37:5)	1.11453
CL2(74:11)	1.11425
CL2(67:4)	1.10835
PE(O-35:1)	1.10725
PC(46:6)	1.1066
PC(45:4)	1.10643
PI(38:4)	1.10519
CL2(69:6)	1.1045
PE(O-39:5)	1.10416
PI(40:3)	1.10395
PS(43:3)	1.10392
PE(38:7)	1.10372
PC(40:2)	1.10285
PS(39:6)	1.09735
PC(39:5)	1.0962
PC(36:3)	1.09395
PE(O-38:3)	1.09131
CL1(72:9)	1.0873
CL2(69:7)	1.08711
CL2(73:8)	1.08598
PC(37:4)	1.08542
CL2(70:7)	1.08519
PI(35:3)	1.08478
PS(41:2)	1.08455
LPC(23:0)	1.08428
PI(33:2)	1.08103
SM(14:1)_OH	1.08034
PE(48:11)	1.07871
PC(42:6)	1.07844
PE(O-42:5)	1.07719
PI(44:11)	1.07564
PI(36:6)	1.07511
PC(48:2)	1.07481
SLBPA(62:11)	1.07118
LPC(32:4)	1.07082
SM(24:0)_OH	1.0685
BMP(40:7)	1.0676
PC(56:10)	1.06751
PE(48:12)	1.06724
PC(48:3)	1.06701
CL1(76:11)	1.067
PC(46:7)	1.06187
PE(O-36:2)	1.06148
PC(43:4)	1.06105
PC(O-44:3)	1.05928
PC(O-45:4)	1.05884
PC(46:9)	1.05536
CL1(73:8)	1.05279
PE(38:6)	1.05273
PC(48:6)	1.05269
SLBPA(64:14)	1.05266
CL1(72:6)	1.0513
PG(34:2)	1.04776
CL1(74:10)	1.04771
PC(46:4)	1.04607
LPC(24:6)	1.04571
PC(52:7)	1.04343
PC(40:8)	1.03912
PC(O-36:4)	1.03791
PC(48:8)	1.03728
PC(45:5)	1.03645
LPG(18:3)	1.0357
PA(34:3)	1.03564
PS(40:7)	1.03517
CL2(71:7)	1.03507
PE(O-42:2)	1.03112
PC(46:0)	1.03045
PS(38:3)	1.03017
LPS(26:0)	1.0301
CL1(69:6)	1.02946
PC(47:9)	1.02911
PC(47:6)	1.0277
PI(37:4)	1.02748
PC(41:4)	1.02349
PC(50:2)	1.02179
PE(O-35:2)	1.02038
PI(34:3)	1.01988
PC(41:3)	1.01857
PI(34:4)	1.01768
PC(48:4)	1.01727
PC(O-34:2)	1.01646
PC(46:5)	1.01589
PS(38:2)	1.01489
PA(38:4)	1.01486
LPC(19:2)	1.01396
PE(O-32:3)	1.01316
PC(54:7)	1.01283
PC(37:2)	1.01057
SM(14:0)_OH	1.0099
CL1(70:8)	1.00964
PC(O-38:1)	1.00792
LPG(22:6)	1.00784
SM(17:0)_OH	1.0076
PC(47:7)	1.00716
BMP(42:8)	1.00695
PC(47:5)	1.00315
PI(44:5)	1.0026
PS(34:3)	1.00253
