# Supplementary material for: Functional characterisation of peroxisomal β-oxidation disorders in fibroblasts using lipidomics
Source: J Inherit Metab Dis. 2017 Aug 28;41(3):479–87. doi: 10.1007/s10545-017-0076-9 (PMC5959964; doi:10.1007/s10545-017-0076-9)
Supplement: Supplementary file 4 — (XLSX 16 kb) [file 10545_2017_76_MOESM4_ESM.xlsx]

## Sheet: A
PL species	Fatty acid composition determined by fragmentation					mzmed	rtmed	avint	Mean_Control *	Mean_ACBD5 *	Mean_ACOX1 *	Mean_ALD *	Mean_DBP *
	Control	ABCD5	ACOX	ALD	DBP
PC(O-40:6)	p18:1+22:5 p18:0+22:6	p18:1+22:5 p18:0+22:6	p18:1+22:5 p18:0+22:6	p18:1+22:5 p18:0+22:6	p18:1+22:5 p18:0+22:6	818.605	8.6706	8.68345e+07	125.193	40.8223	21.6698	54.4372	20.0856
PC(40:9)	20:4+20:5	20:4+20:5	ND	20:4+20:5	20:4+20:5	828.553	8.6736	9.34474e+06	10.7613	6.80153	1.19409	9.82663	2.08724
BMP(40:9)	18:3+22:6 20:4+20:5	18:3+22:6 20:4+20:5	18:3+22:6	18:3+22:6 20:4+20:5	18:3+22:6	815.488	5.7075	5.96079e+06	2.07623	1.40657	0.170592	3.16033	0.662319
BMP(40:10)	20:5+20:5	20:5+20:5	ND	20:5+20:5	ND	813.472	5.6568	1.02811e+06	0.340814	0.229276	0.00095025	0.717057	0.00557973
BMP(42:11)	20:5+22:6	20:5+22:6	20:5+22:6	20:5+22:6	20:5+22:6	839.488	5.6189	3.90124e+07	14.0774	8.85765	0.392039	23.1845	1.76036
BMP(43:11)	21:5+22:6	21:5+22:6	21:5+22:6	21:5+22:6	21:5+22:6	853.504	5.6031	499852	0.187749	0.0954754	0.0335178	0.202591	0.0844667
PS(40:1)	18:1+22:0	18:1+22:0	18:1+22:0 18:0+22:1	18:1+22:0	18:1+22:0 18:0+22:1	844.608	8.1194	1.04619e+08	377.763	129.99	156.519	323.389	179.804
PS(40:6)	18:0+22:6	18:0+22:6	18:0+22:6	18:0+22:6	18:0+22:6	834.53	8.0488	6.06484e+08	2094.68	2305.63	869.869	2115.42	919.248
ND= not detected
mzmed = average m/z
rtmed = average retention time
avint = average intensity (no normalisation)
* = average peak abundance, isotope-corrected and normalised to internal standard

## Sheet: B
PL species (RP)	plasmenyl-ether PL **	fatty acid composition determined by fragmentation		mzmed	rtmed	avint	Mean_Control *	Mean_ACBD5 *	Mean_ACOX1 *	Mean_ALD *	Mean_DBP *
			Component
PC(O-38:5)_RT_12.103		PC(o-16:0/22:5) PC(o-18:1/20:4)	PC(o-38:5)	794.604	12.1027	8.11401e+08	1269364737	4.70192e+08	5.50561e+08	7.41934e+08	683484537
PC(O-32:1)_RT_11.768		PC(0-16:0/16:1) PC(o-16:1/16:0) PC(o-18:1/14:0)	PC(o-32:1)	718.574	11.7679	2.5946e+08	4.0252e+08	1.83292e+08	1.62846e+08	2.45726e+08	2.3876e+08
PE(O-36:2)	X	PE(p-18:0/18:1)	PE(o-36:1)	730.574	12.8694	2.36749e+08	6.67359e+08	3.12511e+08	5.93691e+08	2.47286e+08	5.46632e+08
PC(O-36:2)_RT_12.388		PC(o-18:1/18:1)	PC(o-36:2)	772.621	12.388	2.26433e+08	3.42443e+08	1.34046e+08	160490917	2.0494e+08	2.35199e+08
PC(O-40:7)_RT_12.067		PC(o-18:1/22:6)	PC(o-40:7)	818.604	12.0671	151850603	3.11119e+08	1.06325e+08	1.23358e+08	1.40086e+08	1.54105e+08
PC(O-40:6)_RT_12.201		PC(o-18:1/22:5)	PC(o-40:6)	820.62	12.2012	1.43294e+08	2.27003e+08	9.47344e+07	1.06713e+08	1.08513e+08	1.15113e+08
PC(O-34:2)_RT_11.908		PC(o-18:1/16:1) PC(o-18:2/16:0)	PC(o-34:2)	744.59	11.9075	105841591	143294312	7.15678e+07	6.73828e+07	1.1077e+08	9.85625e+07
PC(O-40:8)	X	PC(p-18:1/22:6)	PC(p-40:7)	816.588	12.0314	2.32949e+07	8.43233e+07	3.36036e+07	3.03046e+07	3.90653e+07	4.564e+07
mzmed = average m/z
rtmed = average retention time
avint = average intensity (no normalisation)
* = mean abundance of isotope-corrected peaks measured in reversed phase, not normalised to internal standards
** = based on acid treatment as described in supplemental Fig. 3
