# Supplementary material for: Functional characterisation of peroxisomal β-oxidation disorders in fibroblasts using lipidomics
Source: J Inherit Metab Dis. 2017 Aug 28;41(3):479–87. doi: 10.1007/s10545-017-0076-9 (PMC5959964; doi:10.1007/s10545-017-0076-9)
Supplement: Supplementary file 5 — (XLSX 110 kb) [file 10545_2017_76_MOESM5_ESM.xlsx]

## Sheet: A) common ratios
ratio.name	avg.ratio.Ctrl	avg.ratio.ACBD5	avg.ratio.ACOX1	avg.ratio.ALD	avg.ratio.DBP	sd.ratio.Ctrl	sd.ratio.ACBD5	sd.ratio.ACOX1	sd.ratio.ALD	sd.ratio.DBP	pval_ACBD5vsCTRL	pval_ACOX1vsCTRL	pval_ALDvsCTRL	pval_DBPvsCTRL	pval_ACOX1vsALD	pval_ACOX1vsDBP	pval_ALDvsDBP	qval_ACOX1vsCTRL	qval_ALDvsCTRL	qval_DBPvsCTRL	qval_ACOX1vsALD	qval_ACOX1vsDBP	qval_ALDvsDBP	bonf_ACOX1vsCTRL	bonf_ALDvsCTRL	bonf_DBPvsCTRL	bonf_ACOX1vsALD	bonf_ACOX1vsDBP	bonf_ALDvsDBP	FC_ACBD5vsCTRL	FC_ACOX1vsCTRL	FC_ALDvsCTRL	FC_DBPvsCTRL	FC_ACOX1vsALD	FC_ACOX1vsDBP	FC_ALDvsDBP
LPC(25:0)_vs_LPC(23:0)	1.21477	2.2313	5.60795	3.28222	5.03797	0.467709	0.324664	0.986372	0.730502	0.786126	0.00854642	3.12589e-06	8.05816e-05	6.84637e-06	0.00038781	0.271208	0.00183109	0.000146088	0.00481962	0.00169294	0.00338346	0.573555	0.0482431	0.103576	1	0.226855	1	1	1	1.83681	4.61646	2.70192	4.14725	1.70858	1.11314	0.651497
LPC(25:0)_vs_LPC(24:0)	0.0710347	0.138366	0.225746	0.167628	0.211961	0.0161601	0.0140096	0.0237499	0.0224043	0.0232572	0.00181281	3.06695e-08	1.69727e-06	7.15418e-07	0.000510613	0.314531	0.00542502	1.49446e-05	0.000653942	0.00055654	0.00389752	0.612767	0.0707085	0.00101623	0.056239	0.0237054	1	1	1	1.94787	3.17797	2.35981	2.98391	1.34671	1.06503	0.790844
LPC(26:0)_vs_LPC(24:0)	0.532576	2.01003	2.92263	2.71923	3.90363	0.228893	0.366447	0.547659	0.908344	0.92599	0.0102824	5.11389e-06	0.000523255	0.00019939	0.623064	0.0529578	0.0413967	0.000186085	0.00999816	0.00854679	0.67521	0.285705	0.137747	0.169449	1	1	1	1	1	3.77417	5.48772	5.1058	7.32971	1.0748	0.748695	0.69659
LPC(26:1)_vs_LPC(24:1)	1.52239	3.59224	3.67175	4.32309	6.28595	0.495654	1.46627	0.709275	1.15293	1.07947	0.128218	4.514e-05	0.000335923	2.72101e-05	0.23186	0.000825874	0.00907459	0.000558934	0.00855981	0.00328372	0.291962	0.067918	0.0835095	1	1	0.901605	1	1	1	2.35961	2.41184	2.83968	4.12902	0.849333	0.584119	0.687739
LPC(28:0)_vs_LPC(29:1)	0.203503	5.80258	13.6839	10.4509	7.03061	0.11535	0.905789	2.27847	1.4765	1.19594	0.00826366	4.14913e-06	1.52237e-06	3.05769e-05	0.00998785	7.32297e-05	0.000752766	0.000167321	0.000607757	0.00346974	0.0235432	0.0327901	0.0353245	0.137481	0.0504438	1	1	1	1	28.5135	67.2416	51.3548	34.5479	1.30935	1.94633	1.48648
LPC(28:1)_vs_LPC(26:1)	0.122589	0.740063	0.336331	0.475336	0.557658	0.0368407	0.276277	0.0867186	0.0964621	0.109121	0.0596759	0.000307661	2.26767e-05	8.82807e-05	0.0151721	0.00275472	0.182765	0.00157176	0.00271413	0.00583868	0.0318176	0.10359	0.294276	1	0.751393	1	1	1	1	6.03692	2.74355	3.87746	4.54899	0.707564	0.603113	0.85238
LPC(28:1)_vs_LPC(29:1)	0.0753743	17.4607	16.7572	14.0893	14.0844	0.0575263	0.834525	2.61282	1.38274	1.31156	0.000750584	2.7305e-06	1.71415e-07	1.47951e-06	0.0403707	0.040984	0.994955	0.000139041	0.000153509	0.000860061	0.0688782	0.25958	0.996037	0.0904751	0.00567984	0.0490235	1	1	1	231.653	222.319	186.924	186.86	1.18936	1.18977	1.00034
LPC(28:1)_vs_LPC(30:0)	1.93441	16.8422	6.2862	13.4888	12.4155	1.46776	5.02045	1.02376	3.83404	2.26695	0.0318963	5.45754e-05	8.75336e-05	7.86644e-06	0.00208181	0.000566546	0.546582	0.000616315	0.00502673	0.0018101	0.00856379	0.0607566	0.632942	1	1	0.260654	1	1	1	8.70667	3.24968	6.97307	6.41822	0.466032	0.50632	1.08645
LPC(28:2)_vs_LPC(26:1)	0.0224421	0.206731	0.0653484	0.0565854	0.100654	0.0111934	0.106275	0.0127001	0.0150305	0.0232567	0.0945774	2.35475e-05	0.000523458	0.000139023	0.26216	0.011634	0.00372694	0.000405323	0.00999816	0.00714276	0.323598	0.166513	0.0629741	0.780247	1	1	1	1	1	9.21175	2.91186	2.52139	4.48505	1.15486	0.649237	0.562176
LPC(28:2)_vs_LPC(26:2)	0.132278	0.79697	0.306049	0.548778	0.616867	0.0694386	0.105911	0.0587622	0.135151	0.128105	0.00295951	0.000307098	4.91347e-05	5.17016e-05	0.00228878	0.00103999	0.371912	0.00157102	0.00377552	0.00447293	0.00909012	0.0724283	0.473427	1	1	1	1	1	1	6.02494	2.31367	4.14866	4.6634	0.557692	0.496135	0.889621
LPC(28:2)_vs_LPC(29:1)	0.0153032	4.79394	3.44374	1.67625	2.54635	0.0160806	1.08854	1.23489	0.356884	0.439992	0.016853	0.000325351	1.70752e-05	3.19514e-05	0.00831913	0.111928	0.0032939	0.00161902	0.00241672	0.00350509	0.0206762	0.389861	0.059936	1	0.565787	1	1	1	1	313.264	225.034	109.536	166.393	2.05442	1.35242	0.658296
LPC(28:2)_vs_LPC(30:0)	0.411292	4.81887	1.2851	1.59269	2.2446	0.427681	2.20585	0.465736	0.481586	0.494608	0.0720477	0.00332664	0.000412268	3.29267e-05	0.247858	0.00465825	0.0361462	0.0070965	0.00915017	0.00355383	0.308762	0.122017	0.12944	1	1	1	1	1	1	11.7164	3.12453	3.8724	5.45744	0.806873	0.572527	0.709563
LPC(30:0)_vs_LPC(29:1)	0.0402817	1.11366	2.71158	1.11093	1.15467	0.011677	0.390242	0.550047	0.286938	0.152007	0.0412989	1.35816e-05	6.13641e-05	9.14486e-06	7.51149e-05	0.00017521	0.734011	0.000309722	0.00423011	0.00189934	0.0015422	0.0413329	0.793548	0.450027	1	0.303015	1	1	1	27.6469	67.3155	27.579	28.665	2.44082	2.34835	0.962115
LPC(30:1)_vs_LPC(29:1)	0.029852	2.41826	2.62333	2.06075	2.65513	0.0053707	0.23541	0.146314	0.171956	0.271993	0.00321696	6.07184e-09	6.97996e-08	2.5065e-06	2.90057e-05	0.804634	0.00159834	7.18537e-06	0.000110134	0.00110737	0.000999842	0.924264	0.0458657	0.00020119	0.00231281	0.0830528	0.961105	1	1	81.0085	87.8778	69.0322	88.9432	1.273	0.988022	0.776138
LPC(30:2)_vs_LPC(29:1)	0.00967097	1.78147	0.875725	1.25239	1.10313	0.00184491	0.0931829	0.153933	0.272606	0.175887	0.00091911	5.7728e-06	1.97085e-05	2.21151e-05	0.010437	0.0334312	0.26128	0.000197605	0.00257673	0.00290531	0.0242179	0.240447	0.367919	0.191282	0.65304	0.732783	1	1	1	184.208	90.5519	129.5	114.067	0.699243	0.793852	1.1353
PC(43:1)_vs_PC(42:1)	0.0312809	0.185329	0.157574	0.203752	0.172644	0.0264518	0.0226551	0.0179608	0.0284159	0.0284591	0.000403764	6.71191e-07	6.40992e-08	2.50382e-06	0.00448013	0.294457	0.0757832	7.13508e-05	0.000110134	0.00110737	0.0137726	0.594189	0.184474	0.0222399	0.00212393	0.0829641	1	1	1	5.92467	5.03737	6.51363	5.51915	0.773359	0.912708	1.18019
PC(43:1)_vs_PC(42:2)	0.0289415	0.182403	0.146973	0.232557	0.221407	0.0240219	0.0073081	0.016613	0.034718	0.0524326	4.31102e-07	4.92086e-07	8.44047e-08	8.7557e-05	0.000277749	0.0162331	0.668105	6.10684e-05	0.00011187	0.00581423	0.00288592	0.186729	0.737602	0.0163053	0.00279675	1	1	1	1	6.30248	5.07827	8.03541	7.65015	0.631986	0.663813	1.05036
PC(43:1)_vs_PC(43:3)	0.58176	1.82941	1.56104	3.49391	2.37602	0.419957	0.321593	0.294386	1.15111	0.4141	0.003568	0.000398286	0.000296895	1.03165e-05	0.00382008	0.0030693	0.044535	0.00181117	0.00817399	0.0020153	0.0124622	0.108099	0.14248	1	1	0.341838	1	1	1	3.14461	2.6833	6.00576	4.08419	0.446788	0.656998	1.47049
PC(43:1)_vs_PC(44:3)	0.0603777	0.170128	0.182883	0.355548	0.246964	0.044017	0.0177885	0.0244491	0.0708003	0.0639429	0.000508811	9.96877e-05	2.80962e-06	0.000225325	0.00039305	0.0582267	0.014387	0.000837548	0.000849263	0.00907184	0.00340223	0.296822	0.0948061	1	0.0930968	1	1	1	1	2.81773	3.02898	5.88874	4.09032	0.514369	0.740525	1.43968
PC(44:1)_vs_PC(42:1)	0.264551	1.20395	0.814902	1.44187	0.910473	0.130314	0.0392998	0.0763176	0.366297	0.153107	1.74143e-07	2.82736e-06	6.22208e-05	1.0747e-05	0.00360432	0.207111	0.00767056	0.000140457	0.0042685	0.0020153	0.0120331	0.507295	0.0801526	0.0936846	1	0.356103	1	1	1	4.5509	3.08032	5.45024	3.44157	0.56517	0.895031	1.58365
PC(44:1)_vs_PC(42:2)	0.24546	1.191	0.761936	1.63875	1.16925	0.120371	0.0702834	0.0901861	0.401386	0.289047	1.75199e-06	1.76265e-06	4.66104e-05	0.000235071	0.000959399	0.0167572	0.0331483	0.000114521	0.00368949	0.00926169	0.00548867	0.188755	0.125299	0.0584055	1	1	1	1	1	4.85211	3.10411	6.67626	4.7635	0.464948	0.651645	1.40154
PC(44:2)_vs_PC(42:1)	0.561588	1.90692	1.2637	1.34767	1.27614	0.158328	0.170114	0.231226	0.288375	0.176125	0.000545017	4.41644e-05	0.000118226	1.54163e-05	0.559526	0.914475	0.595772	0.000554734	0.00574783	0.00242025	0.616824	0.971451	0.675873	1	1	0.51082	1	1	1	3.39559	2.25024	2.39975	2.27239	0.937695	0.990252	1.05605
PC(44:2)_vs_PC(42:2)	0.519016	1.87997	1.16799	1.53153	1.62566	0.164631	0.0293083	0.124956	0.311767	0.313529	1.85544e-07	4.06717e-06	3.126e-05	8.74808e-05	0.0213673	0.0140594	0.599583	0.00016556	0.00311678	0.00581423	0.0413869	0.179289	0.679359	0.134766	1	1	1	1	1	3.62217	2.2504	2.95083	3.13219	0.762632	0.718473	0.942097
PC(45:1)_vs_PC(43:1)	0.0959051	0.539537	0.442167	0.499335	0.451891	0.140397	0.158871	0.08667	0.13776	0.0981152	0.0189614	0.000243871	0.000153557	0.00026026	0.374388	0.854643	0.485646	0.00137919	0.00638408	0.00969377	0.438553	0.94739	0.578615	1	1	1	1	1	1	5.62574	4.61046	5.20655	4.71185	0.885512	0.978481	1.10499
PC(45:1)_vs_PC(43:2)	0.0399512	0.535542	0.374483	0.739464	0.579799	0.0532966	0.130768	0.0993343	0.250622	0.142739	0.0169462	2.27789e-05	0.000239751	0.000103121	0.0074121	0.0163909	0.182467	0.000397252	0.00748921	0.0062336	0.0191054	0.18745	0.294053	0.754778	1	1	1	1	1	13.4049	9.3735	18.5092	14.5127	0.506425	0.645884	1.27538
PC(45:1)_vs_PC(44:0)	0.0969444	1.00026	0.468884	0.660309	0.661237	0.158741	0.175508	0.124922	0.160426	0.152747	0.00260785	0.000448344	2.52316e-05	4.65571e-05	0.0294421	0.0343724	0.991677	0.00195344	0.0027895	0.0042265	0.0532802	0.243195	0.993808	1	0.836048	1	1	1	1	10.3179	4.83663	6.81122	6.82079	0.710098	0.709101	0.998596
PC(45:1)_vs_PC(44:1)	0.0088835	0.0814373	0.0853645	0.0707509	0.0856275	0.0123364	0.0181389	0.0169194	0.0125289	0.0177023	0.00943145	1.05926e-06	7.73035e-07	1.0928e-05	0.0932912	0.978768	0.119764	8.66723e-05	0.000394069	0.0020153	0.137009	0.993535	0.234235	0.0350985	0.0256145	0.3621	1	1	1	9.16725	9.60933	7.96431	9.63893	1.20655	0.996929	0.826264
PC(45:1)_vs_PC(44:2)	0.00390571	0.0519403	0.0557386	0.075505	0.0614849	0.00545809	0.0137963	0.0120512	0.0153401	0.0160379	0.0206946	4.66061e-06	4.59141e-06	0.000157336	0.0208472	0.489129	0.138476	0.000177098	0.0011537	0.00761756	0.0406155	0.747913	0.252436	0.154429	0.152136	1	1	1	1	13.2986	14.2711	19.332	15.7423	0.738211	0.906542	1.22803
PC(45:2)_vs_PC(41:1)	0.168467	4.71467	0.948427	1.99555	1.60983	0.306348	1.67233	0.17538	0.663712	0.479535	0.0405449	0.000194488	0.000130876	0.000194543	0.00521461	0.0179964	0.251419	0.00121271	0.00601994	0.00844704	0.0151837	0.192296	0.358133	1	1	1	1	1	1	27.9856	5.62974	11.8453	9.55576	0.47527	0.589146	1.2396
PC(45:2)_vs_PC(42:1)	0.00911521	0.283025	0.12719	0.15858	0.157518	0.0152161	0.0387386	0.0260776	0.0610532	0.0419349	0.00433754	1.536e-06	0.000476914	0.000157175	0.245793	0.162715	0.9712	0.000106537	0.00963449	0.00761756	0.30657	0.45641	0.979398	0.0508955	1	1	1	1	1	31.0498	13.9536	17.3973	17.2808	0.802055	0.807463	1.00674
PC(45:2)_vs_PC(43:2)	0.12495	1.55082	0.672215	1.10383	1.14075	0.162845	0.306831	0.101254	0.295804	0.120892	0.0086627	1.90678e-05	2.52558e-05	6.65133e-08	0.00742461	2.23658e-05	0.770095	0.000365209	0.0027895	0.000189886	0.0191228	0.0229668	0.821993	0.631811	0.83685	0.00220392	1	0.74109	1	12.4115	5.37986	8.83415	9.12964	0.608984	0.589274	0.967634
PC(45:2)_vs_PC(43:3)	0.195273	2.7614	1.24815	2.60069	2.16035	0.28551	0.160648	0.261712	0.857769	0.571289	4.78868e-07	1.14484e-05	0.000166354	0.000113048	0.00509389	0.00922248	0.294955	0.000284152	0.00658403	0.00649191	0.0149636	0.152273	0.399548	0.379343	1	1	1	1	1	14.1412	6.39182	13.3182	11.0632	0.479931	0.577753	1.20382
PC(45:2)_vs_PC(44:1)	0.0267045	0.234846	0.15567	0.107971	0.170679	0.0336981	0.029035	0.0251539	0.0256168	0.0258923	0.000329127	5.37934e-06	0.000335997	3.10548e-06	0.00426378	0.314597	0.00119482	0.000190418	0.00855981	0.00116978	0.0133397	0.612767	0.0405408	0.178244	1	0.1029	1	1	1	8.79424	5.82934	4.04318	6.39138	1.44177	0.912063	0.6326
PC(45:2)_vs_PC(44:2)	0.0132993	0.148301	0.100656	0.114331	0.122059	0.0192137	0.0141382	0.00780641	0.0243023	0.0224909	4.09367e-05	4.03568e-06	2.47688e-06	3.19184e-06	0.197991	0.0680301	0.563977	0.000164886	0.000820714	0.00117513	0.256017	0.31707	0.647361	0.133722	0.0820714	0.105762	1	1	1	11.151	7.5685	8.59678	9.17784	0.880388	0.824649	0.936689
PC(45:5)_vs_PC(56:10)	0.0288833	0.0993806	0.504677	0.100076	0.214383	0.0185954	0.0366775	0.209763	0.0255115	0.0463826	0.0667294	0.000929075	9.46482e-05	6.60778e-05	0.00210871	0.00995326	0.000818135	0.0030341	0.00524443	0.00510219	0.00862513	0.155999	0.0359293	1	1	1	1	1	1	3.44076	17.473	3.46485	7.42237	5.04292	2.35409	0.466812
PC(46:1)_vs_PC(43:1)	0.183514	1.93796	1.67931	1.68638	1.55119	0.331182	0.257304	0.224501	0.619478	0.425577	0.000276051	1.15037e-06	0.000288725	0.000103885	0.978083	0.527871	0.652267	9.00416e-05	0.00807333	0.0062336	0.982382	0.773918	0.724376	0.0381176	1	1	1	1	1	10.5603	9.15084	9.18938	8.45269	0.995807	1.0826	1.08715
PC(46:1)_vs_PC(43:2)	0.102709	1.95212	1.4017	2.42455	1.97999	0.154076	0.325726	0.208349	0.737695	0.559662	0.00605034	3.92787e-08	0.00011843	0.000281276	0.00970343	0.0525772	0.243463	1.57481e-05	0.00574783	0.00998938	0.0230384	0.284717	0.350654	0.0013015	1	1	1	1	1	19.0062	13.6472	23.6059	19.2775	0.578127	0.707934	1.22453
PC(46:1)_vs_PC(44:0)	0.064598	3.66661	1.75544	2.20329	2.23068	0.0798586	0.326447	0.249157	0.653674	0.41086	0.00221052	4.17932e-07	0.000116367	3.47329e-05	0.130186	0.0387207	0.928699	5.74613e-05	0.00573425	0.00366804	0.180717	0.252772	0.948011	0.0138482	1	1	1	1	1	56.7604	27.1748	34.1077	34.5317	0.796736	0.786953	0.987722
PC(46:1)_vs_PC(44:1)	0.0126786	0.296058	0.32314	0.236076	0.293556	0.0185337	0.0269733	0.0347637	0.0532224	0.0764593	0.000632874	4.97256e-09	1.01835e-05	0.000192995	0.00442316	0.412368	0.156991	6.33714e-06	0.001755	0.00841528	0.0136667	0.692856	0.270256	0.000164766	0.337431	1	1	1	1	23.351	25.4871	18.6201	23.1537	1.36879	1.10078	0.804194
PC(46:1)_vs_PC(46:3)	0.0905931	0.575647	1.07589	1.61399	0.899921	0.124257	0.0332225	0.17645	0.37352	0.153349	1.76809e-05	1.33225e-07	1.35347e-05	1.54337e-06	0.0079013	0.0806556	0.00158927	3.02777e-05	0.0020667	0.000866736	0.0199611	0.341144	0.0458469	0.00441442	0.448474	0.0511397	1	1	1	6.3542	11.8761	17.8158	9.93366	0.666604	1.19554	1.79348
PC(46:1)_vs_PC(48:3)	0.22555	1.88849	3.7862	3.94245	3.06076	0.251241	0.0716538	0.696804	0.943632	0.576489	3.55331e-07	2.31899e-06	2.3705e-05	1.55091e-05	0.731154	0.0645543	0.0658213	0.000129235	0.00273698	0.00242025	0.773154	0.309493	0.171515	0.0768396	0.785467	0.513894	1	1	1	8.3728	16.7865	17.4793	13.5702	0.960367	1.23701	1.28806
PC(46:2)_vs_PC(43:3)	0.721431	9.3927	3.54734	8.63923	6.92965	0.446012	0.489499	0.860176	2.2057	1.70666	3.53442e-05	2.93371e-05	5.45618e-05	0.000191708	0.000507562	0.00302055	0.144118	0.000451713	0.0039978	0.00841358	0.00389105	0.107467	0.258097	0.972086	1	1	1	1	1	13.0195	4.91709	11.9751	9.60542	0.410609	0.511908	1.24671
PC(46:2)_vs_PC(44:1)	0.132931	0.799918	0.438147	0.364682	0.552753	0.0928456	0.107698	0.0529503	0.0508458	0.0972643	0.00160791	2.53934e-05	0.000230945	9.45675e-06	0.0212924	0.0346869	0.00340723	0.000419447	0.00739427	0.00192202	0.0412977	0.243805	0.0608069	0.84141	1	0.313349	1	1	1	6.01752	3.29604	2.74338	4.15819	1.20145	0.792663	0.659755
PC(46:2)_vs_PC(44:2)	0.0607461	0.50452	0.284927	0.387553	0.394379	0.0492401	0.0473666	0.0278664	0.0515718	0.0795677	0.0001797	1.58549e-06	4.39981e-08	1.8485e-05	0.00115409	0.0182639	0.861308	0.000108393	9.70761e-05	0.00271017	0.00608932	0.19266	0.895693	0.0525351	0.00145788	0.612499	1	1	1	8.30538	4.69046	6.37988	6.49224	0.735196	0.722471	0.982692
PC(46:5)_vs_PC(56:10)	0.236549	1.52391	5.2383	1.43683	2.9498	0.151899	0.540061	2.16338	0.428552	0.701366	0.049717	0.000850946	0.000157088	0.000159522	0.00318102	0.0316293	0.00174204	0.00288523	0.00642605	0.0076449	0.0111538	0.235122	0.0469468	1	1	1	1	1	1	6.44226	22.1447	6.07412	12.4702	3.64574	1.77581	0.487092
PC(47:5)_vs_PC(45:4)	0.695987	2.13347	1.58917	2.09143	2.30674	0.310342	0.217933	0.23934	0.471263	0.520964	0.000232205	7.7227e-05	5.48663e-05	0.000173836	0.033353	0.0178973	0.455193	0.000735321	0.0039978	0.00798899	0.0589886	0.192158	0.550589	1	1	1	1	1	1	3.06539	2.28334	3.00499	3.31434	0.75985	0.688927	0.906662
PC(47:5)_vs_PC(45:5)	0.222473	1.52582	0.867316	1.57533	1.37504	0.124494	0.278532	0.0982447	0.359006	0.347413	0.00995318	2.60941e-07	2.17412e-05	0.000229827	0.00157892	0.0146204	0.329862	4.45685e-05	0.00271291	0.00916405	0.00729572	0.182054	0.433247	0.00864628	0.720396	1	1	1	1	6.85847	3.89853	7.08099	6.18072	0.550562	0.630756	1.14566
PC(47:5)_vs_PC(46:5)	0.0270723	0.0977915	0.0831677	0.109132	0.0988533	0.0141808	0.008201	0.00686959	0.0146464	0.0137102	2.99072e-05	7.6434e-06	1.82394e-07	1.80866e-06	0.00243957	0.0380494	0.21857	0.000232779	0.000159043	0.000923552	0.00947992	0.251101	0.327467	0.253264	0.00604363	0.0599299	1	1	1	3.61223	3.07206	4.03114	3.65146	0.762081	0.841324	1.10398
PC(48:2)_vs_PC(44:0)	0.0181382	1.65841	0.597786	0.493987	0.910997	0.0297529	0.47991	0.147818	0.174055	0.226785	0.0272013	3.18741e-05	0.00029656	0.000179456	0.252902	0.0190514	0.00482912	0.000471495	0.00817399	0.0081238	0.314007	0.19562	0.0686516	1	1	1	1	1	1	91.4317	32.9572	27.2345	50.2252	1.21013	0.656189	0.542249
PC(48:2)_vs_PC(46:2)	0.0290708	0.164979	0.247988	0.143261	0.217069	0.0330364	0.0238254	0.0208143	0.0286616	0.0592467	0.000524133	3.41662e-08	1.80969e-05	0.000160176	8.30315e-06	0.269373	0.0272096	1.54377e-05	0.00249029	0.00764758	0.000541283	0.571772	0.115866	0.0011321	0.599641	1	0.275125	1	1	5.67508	8.5305	4.92801	7.46692	1.73102	1.14244	0.659979
PC(48:2)_vs_PC(48:3)	0.0666935	0.843236	1.25395	0.876416	1.22976	0.1051	0.164999	0.144487	0.238993	0.204711	0.00670354	2.22705e-09	3.06583e-05	3.66068e-06	0.00514539	0.814003	0.01521	4.82079e-06	0.00306908	0.00126351	0.0150545	0.928628	0.0965193	7.37934e-05	1	0.121297	1	1	1	12.6434	18.8018	13.1409	18.4389	1.43078	1.01968	0.712675
PC(48:4)_vs_PC(46:4)	0.0294809	0.330841	0.402866	0.257386	0.347396	0.0106158	0.0201929	0.0338839	0.0553846	0.08215	0.000496686	1.44523e-08	2.45655e-05	0.00019596	0.000149013	0.169839	0.0502261	1.19719e-05	0.00274792	0.0084842	0.0021368	0.465492	0.14981	0.000478876	0.813977	1	1	1	1	11.2222	13.6653	8.73061	11.7838	1.56522	1.15967	0.740902
PC(48:4)_vs_PC(47:5)	0.477279	1.76635	2.34551	2.00072	1.89594	0.190133	0.11211	0.197589	0.285238	0.370788	5.02169e-06	4.77892e-10	2.33706e-07	5.37929e-05	0.023972	0.0308386	0.586155	3.16699e-06	0.000193596	0.00460576	0.0453039	0.232712	0.667455	1.58349e-05	0.00774383	1	1	1	1	3.70088	4.91433	4.19193	3.9724	1.17233	1.23712	1.05526
PC(48:4)_vs_PC(47:6)	0.38835	4.02553	4.04808	5.47428	5.34405	0.178291	0.193138	0.720876	1.27713	1.15055	2.62128e-05	5.03018e-06	3.54042e-05	0.000109242	0.028894	0.0434968	0.850219	0.000184375	0.00329589	0.00641794	0.0525123	0.263534	0.887419	0.166675	1	1	1	1	1	10.3657	10.4238	14.0962	13.7609	0.739473	0.757493	1.02437
PC(48:4)_vs_PC(47:7)	0.502082	5.82202	5.42974	14.8318	9.31689	0.386228	0.83819	0.93109	2.57878	2.37876	0.00478788	1.20151e-06	4.59033e-06	0.000227151	2.55418e-05	0.00853312	0.00208824	9.17325e-05	0.0011537	0.00913429	0.000937239	0.147879	0.0512194	0.0398119	0.152101	1	0.846327	1	1	11.5958	10.8144	29.5406	18.5565	0.366087	0.582784	1.59193
PC(48:4)_vs_PC(48:6)	0.0639995	0.390022	0.491058	0.758984	0.504264	0.0458478	0.0351241	0.0713704	0.163128	0.0794924	5.80926e-05	8.57602e-08	1.32223e-05	2.90275e-06	0.00384326	0.760611	0.00530981	2.41198e-05	0.00203717	0.00116978	0.0125021	0.902841	0.0704531	0.00284166	0.438122	0.0961826	1	1	1	6.09414	7.67284	11.8592	7.87919	0.646993	0.973811	1.50513
PC(48:4)_vs_PC(48:7)	0.0518321	0.382581	0.459524	1.08636	0.558237	0.0298911	0.0264415	0.0943682	0.105765	0.141017	3.41453e-05	9.9448e-06	4.68156e-08	0.000236127	7.28228e-08	0.180775	3.15175e-05	0.000265435	9.70761e-05	0.00928123	6.26815e-05	0.478126	0.00828834	0.329521	0.00155123	1	0.00241298	1	1	7.38115	8.86563	20.9593	10.7701	0.422993	0.823171	1.94606
PC(48:4)_vs_PC(48:8)	0.0433761	0.342674	0.435254	1.89823	0.711151	0.0195549	0.101589	0.111314	0.42066	0.118097	0.0345447	6.66349e-05	2.3335e-05	2.67449e-05	5.30114e-05	0.00138239	0.000176146	0.000676455	0.00271413	0.00327009	0.00131084	0.082237	0.0171665	1	0.773204	0.886194	1	1	1	7.90007	10.0344	43.7622	16.395	0.229294	0.612042	2.66924
PC(48:4)_vs_PC(52:7)	1.05841	2.53926	4.8387	6.01064	4.27809	1.12828	0.0888444	1.286	2.1219	0.643807	0.0130765	8.43051e-05	0.000383225	8.52844e-05	0.240198	0.336572	0.0777706	0.000767345	0.00896079	0.00581423	0.300645	0.63193	0.186983	1	1	1	1	1	1	2.39913	4.57167	5.67895	4.04201	0.805021	1.13104	1.40498
PE(44:2)_vs_PE(37:2)	0.0320581	0.203518	0.264928	0.157517	0.261272	0.0130099	0.0175027	0.0730608	0.0439654	0.0594816	0.000607967	0.000119482	0.000166513	0.000161723	0.00774819	0.922592	0.00632783	0.000923648	0.00658403	0.00766652	0.0196823	0.974778	0.0743603	1	1	1	1	1	1	6.34841	8.264	4.9135	8.14995	1.6819	1.01399	0.602888
PE(46:4)_vs_PE(46:6)	0.0898894	0.385777	0.662241	0.759679	0.728829	0.0721511	0.0386452	0.148496	0.191957	0.180723	6.00305e-05	9.33431e-06	3.2475e-05	0.000138104	0.310326	0.489442	0.771219	0.000256249	0.0031686	0.00713861	0.373765	0.747978	0.8229	0.309292	1	1	1	1	1	4.29168	7.36729	8.45126	8.10806	0.871739	0.908638	1.04233
SM(d44:1)_vs_SM(d43:1)	0.364848	0.986176	0.913816	1.05888	1.16262	0.0533517	0.0251668	0.0410724	0.150551	0.170345	1.28537e-08	1.62588e-10	5.06143e-06	3.97606e-05	0.0440415	0.0149285	0.274777	3.16699e-06	0.00119793	0.00391036	0.0739269	0.182974	0.380529	5.38735e-06	0.16771	1	1	1	1	2.70298	2.50465	2.90226	3.18659	0.862999	0.785997	0.910774
SM(d46:2)_vs_SM(d44:1)	0.00792746	0.0465904	0.0303365	0.0265399	0.0499544	0.00513976	0.00559345	0.012064	0.00717517	0.0129112	0.000912822	0.00188122	0.000172465	0.000224393	0.490972	0.017652	0.00474679	0.00481928	0.00666963	0.0090674	0.55209	0.191019	0.0684145	1	1	1	1	1	1	5.87709	3.82676	3.34785	6.30144	1.14305	0.607284	0.531283
SM(d46:2)_vs_SM(d44:2)	0.00140721	0.0125639	0.00711555	0.0110423	0.0122933	0.000965612	0.0017958	0.00282098	0.00259763	0.0028604	0.00419394	0.00123693	2.15226e-05	0.000114702	0.0190828	0.00772063	0.4308	0.00362513	0.00270239	0.0065238	0.037881	0.144234	0.528237	1	0.713151	1	1	1	1	8.92828	5.05651	7.84694	8.73598	0.644392	0.578814	0.898233
SM(d46:2)_vs_SM(d44:3)	0.00180463	0.0211876	0.0109057	0.0227789	0.0203009	0.00103146	0.0029331	0.00437819	0.00524349	0.00425957	0.00545971	0.00124383	2.86891e-05	8.05324e-05	0.000663822	0.00250923	0.367511	0.00363956	0.00300827	0.00564152	0.00450087	0.0994539	0.469376	1	0.950612	1	1	1	1	11.7407	6.0432	12.6225	11.2494	0.478765	0.537204	1.12206
SM(d46:2)_vs_SM(d45:2)	0.101177	0.513373	0.350936	0.471773	0.55042	0.0570431	0.0907688	0.0956625	0.0820988	0.125188	0.00749983	0.000157489	1.11977e-06	0.000101781	0.0265139	0.0106049	0.223098	0.0010793	0.000475685	0.00616695	0.0490338	0.161029	0.331556	1	0.0371034	1	1	1	1	5.07403	3.46855	4.66287	5.4402	0.743866	0.637578	0.857114

## Sheet: B) specific ratios ACOX1+DBP
ratio.name	avg.ratio.Ctrl	avg.ratio.ACBD5	avg.ratio.ACOX1	avg.ratio.ALD	avg.ratio.DBP	sd.ratio.Ctrl	sd.ratio.ACBD5	sd.ratio.ACOX1	sd.ratio.ALD	sd.ratio.DBP	pval_ACBD5vsCTRL	pval_ACOX1vsCTRL	pval_ALDvsCTRL	pval_DBPvsCTRL	pval_ACOX1vsALD	pval_ACOX1vsDBP	pval_ALDvsDBP	qval_ACOX1vsCTRL	qval_ALDvsCTRL	qval_DBPvsCTRL	qval_ACOX1vsALD	qval_ACOX1vsDBP	qval_ALDvsDBP	bonf_ACOX1vsCTRL	bonf_ALDvsCTRL	bonf_DBPvsCTRL	bonf_ACOX1vsALD	bonf_ACOX1vsDBP	bonf_ALDvsDBP	FC_ACBD5vsCTRL	FC_ACOX1vsCTRL	FC_ALDvsCTRL	FC_DBPvsCTRL	FC_ACOX1vsALD	FC_ACOX1vsDBP	FC_ALDvsDBP
LPC(19:1)_vs_LPC(16:2)	3.65448	5.43516	37.3803	5.35784	15.3969	0.930009	0.876034	14.3665	2.65377	2.45933	0.0434559	0.000787452	0.150449	2.56412e-05	0.000912636	0.00636344	2.15675e-05	0.00275031	0.237863	0.0031821	0.00533996	0.134921	0.00721859	1	1	0.849621	1	1	0.71464	1.48726	10.2286	1.4661	4.21317	6.97675	2.42778	0.347981
LPC(20:1)_vs_LPC(16:2)	8.73883	13.209	98.8026	12.5795	37.0972	2.14742	1.78395	39.7779	6.57125	6.94043	0.021319	0.000959545	0.183522	8.63771e-05	0.00109163	0.00594831	5.50024e-05	0.00310173	0.272203	0.00581423	0.00590069	0.132763	0.0107206	1	1	1	1	1	1	1.51153	11.3062	1.43949	4.2451	7.85428	2.66334	0.339095
LPC(20:2)_vs_LPC(16:2)	3.02168	5.05883	50.5694	4.94185	18.6371	0.869338	1.07542	19.8357	2.73071	3.48147	0.057948	0.000712579	0.118344	6.59711e-05	0.000819475	0.00496549	2.02796e-05	0.00258047	0.201048	0.00510219	0.00505908	0.125209	0.00687799	1	1	1	1	1	0.671963	1.67418	16.7355	1.63547	6.16778	10.2329	2.71338	0.265163
LPC(21:2)_vs_LPC(16:2)	0.0835368	0.102328	1.37574	0.13672	0.412972	0.036216	0.0166733	0.651778	0.0663789	0.0989118	0.295134	0.00190701	0.0946873	0.000219034	0.00230298	0.00759161	0.000312054	0.0048633	0.171869	0.00894907	0.00912134	0.143641	0.0235533	1	1	1	1	1	1	1.22495	16.4687	1.63664	4.9436	10.0625	3.33131	0.331062
LPC(22:2)_vs_LPC(16:2)	0.292958	0.454271	7.6295	0.454354	2.30041	0.068945	0.106458	3.13422	0.235782	0.506	0.102149	0.000814327	0.125612	0.000171146	0.000893654	0.00383047	8.82008e-05	0.00280721	0.209944	0.00789824	0.0052915	0.11602	0.0127956	1	1	1	1	1	1	1.55064	26.043	1.55092	7.85237	16.792	3.31658	0.19751
LPC(22:2)_vs_LPC(23:3)	1.32603	4.30966	7.73521	1.38131	9.97009	1.74775	6.78039	3.19573	1.82502	2.66369	0.526999	0.00109467	0.954795	0.000109466	0.00116305	0.19647	0.000109389	0.00335154	0.965017	0.00641839	0.00610998	0.495398	0.0139439	1	1	1	1	1	1	3.25005	5.83337	1.04169	7.51877	5.5999	0.775842	0.138546
LPC(24:2)_vs_LPC(22:1)	0.134015	0.240909	0.649563	0.185259	0.493739	0.0400462	0.0584014	0.084407	0.0404468	0.0873003	0.0669409	2.37258e-07	0.0346375	4.22049e-05	5.4217e-07	0.00802324	0.000108823	4.21258e-05	0.0874383	0.00404179	0.00016761	0.145115	0.0139439	0.00786154	1	1	0.0179648	1	1	1.79763	4.84693	1.38237	3.6842	3.50624	1.3156	0.375217
LPC(24:3)_vs_LPC(23:3)	1.17742	7.29447	19.0333	3.26984	20.8862	0.971318	11.8121	6.27805	4.93992	5.31315	0.464481	0.000244161	0.310762	0.000215747	0.000255823	0.575985	9.11045e-05	0.00138012	0.398665	0.00894411	0.00277288	0.802948	0.0130682	1	1	1	1	1	1	6.19529	16.1653	2.77712	17.7389	5.82087	0.911287	0.156555
LPC(24:4)_vs_LPC(19:2)	2.69699	6.34634	15.7773	3.20201	8.01227	1.53172	2.30941	6.84759	1.54284	1.5102	0.0931604	0.00200278	0.550303	6.62122e-05	0.00246408	0.023617	0.000157006	0.00503048	0.624806	0.00510219	0.00954606	0.210471	0.0159146	1	1	1	1	1	1	2.35312	5.84997	1.18725	2.97082	4.92732	1.96915	0.399638
LPC(25:0)_vs_LPC(23:0)	1.21477	2.2313	5.60795	3.28222	5.03797	0.467709	0.324664	0.986372	0.730502	0.786126	0.00854642	3.12589e-06	8.05816e-05	6.84637e-06	0.00038781	0.271208	0.00183109	0.000146088	0.00481962	0.00169294	0.00338346	0.573555	0.0482431	0.103576	1	0.226855	1	1	1	1.83681	4.61646	2.70192	4.14725	1.70858	1.11314	0.651497
LPC(25:1)_vs_LPC(23:0)	1.02577	2.12832	6.52107	1.57753	4.63921	0.328844	0.287904	0.918236	0.445458	1.07367	0.00459393	7.49539e-07	0.023071	0.000251519	6.19556e-07	0.00720059	0.000456769	7.34132e-05	0.0677772	0.00954995	0.000169661	0.141882	0.0289284	0.024836	1	1	0.020529	1	1	2.07485	6.35723	1.53789	4.52264	4.13373	1.40564	0.340042
PC(37:4)_vs_PC(36:5)	0.290355	0.447175	0.936259	0.351869	0.641745	0.0376121	0.0789671	0.283034	0.118813	0.0821208	0.0635496	0.000860437	0.2318	3.33195e-05	0.00098627	0.0334059	0.00034615	0.00290084	0.321121	0.00357295	0.00557552	0.24042	0.0250978	1	1	1	1	1	1	1.5401	3.22453	1.21186	2.21021	2.66082	1.45893	0.5483
PC(39:5)_vs_PC(36:5)	0.179742	0.328979	0.944692	0.211343	0.483329	0.0411921	0.0460834	0.0794263	0.0427116	0.0537429	0.0119313	3.01053e-09	0.184244	9.5273e-07	3.49245e-09	1.29366e-07	2.31155e-06	5.02587e-06	0.272876	0.000633114	1.92871e-05	0.00428654	0.00239354	9.97538e-05	1	0.0315687	0.000115722	0.00428654	0.0765933	1.83029	5.25583	1.17582	2.68902	4.46995	1.95455	0.437266
PC(40:1)_vs_PC(36:3)	0.00841043	0.00859063	0.042657	0.0103049	0.0250058	0.00285118	0.00112121	0.01413	0.00356248	0.00464711	0.889565	0.000555535	0.294562	6.06954e-05	0.00070014	0.0156397	0.000117719	0.00222745	0.382976	0.00485783	0.00464165	0.184947	0.0141809	1	1	1	1	1	1	1.02143	5.07192	1.22525	2.97319	4.1395	1.70589	0.4121
PC(40:1)_vs_PC(40:7)	0.0116731	0.0131488	0.0722564	0.015522	0.0477694	0.00330814	0.00149124	0.0143669	0.00509311	0.0106817	0.36025	1.80227e-05	0.123644	0.000243404	1.50994e-05	0.00494564	0.000275122	0.000357167	0.207525	0.00938373	0.00071806	0.125042	0.0215869	0.597182	1	1	0.500318	1	1	1.12642	6.18997	1.32972	4.09225	4.65509	1.51261	0.324936
PC(40:3)_vs_PC(36:6)	0.305136	0.881227	7.02575	0.365758	2.68596	0.0658912	0.339468	4.02205	0.193391	0.378854	0.0965688	0.0044637	0.456901	1.51008e-05	0.00463778	0.028908	2.22076e-06	0.00873058	0.538137	0.00242025	0.014072	0.226661	0.00239354	1	1	0.500366	1	1	0.073585	2.88799	23.025	1.19867	8.80253	19.2087	2.61573	0.136174
PC(40:3)_vs_PC(38:6)	0.0197202	0.0457317	0.157846	0.0231979	0.0964295	0.00364743	0.0110273	0.0260385	0.0110767	0.0110713	0.0492663	6.31748e-06	0.45501	3.85472e-06	1.32825e-06	0.000401724	1.68162e-07	0.000208288	0.536482	0.00127038	0.000241756	0.0535533	0.000588792	0.20933	1	0.127726	0.0440117	1	0.00557206	2.31903	8.00429	1.17635	4.88989	6.80431	1.6369	0.240569
PC(40:3)_vs_PC(38:7)	0.161063	0.341968	2.14278	0.179067	1.02455	0.0342063	0.111583	0.464445	0.0773864	0.188199	0.101436	2.7252e-05	0.588388	7.38948e-05	2.27663e-05	0.000361051	3.11384e-05	0.000433791	0.658323	0.00536571	0.0008854	0.0521247	0.00828834	0.902994	1	1	0.754361	1	1	2.1232	13.304	1.11179	6.36122	11.9664	2.09143	0.174776
PC(40:3)_vs_PC(39:7)	0.80015	1.6338	5.92858	0.910274	3.67237	0.176394	0.53216	2.14325	0.470859	0.714104	0.107013	0.00070184	0.578935	0.000118484	0.000654087	0.0323446	2.95813e-05	0.00255764	0.649677	0.00661234	0.00446737	0.23732	0.00811952	1	1	1	1	1	0.980176	2.04187	7.40934	1.13763	4.58961	6.51296	1.61437	0.247871
PC(40:3)_vs_PC(40:6)	0.0211154	0.0284903	0.0896358	0.0219109	0.06978	0.00330478	0.00409837	0.0125798	0.00901338	0.00627489	0.0657483	2.89234e-06	0.832246	3.67834e-07	1.87064e-07	0.00503553	3.14758e-07	0.000142531	0.86617	0.000493565	0.000100803	0.125586	0.000869125	0.0958377	1	0.0121882	0.00619836	1	0.0104295	1.34927	4.24505	1.03768	3.3047	4.09092	1.28455	0.314
PC(40:3)_vs_PC(40:7)	0.0367405	0.0554167	0.18205	0.0371641	0.1239	0.0054766	0.00678954	0.0324161	0.0155581	0.011592	0.0216387	1.58295e-05	0.94761	7.41174e-07	2.93795e-06	0.0024071	2.09218e-07	0.000333348	0.959492	0.00055654	0.000327775	0.0985944	0.000630223	0.524511	1	0.0245588	0.0973491	1	0.00693245	1.50833	4.95503	1.01153	3.3723	4.89855	1.46933	0.299952
PC(41:4)_vs_PC(38:7)	0.0486899	0.150729	0.624807	0.0722072	0.28174	0.0104353	0.0565064	0.164961	0.0194461	0.0552236	0.0867229	8.76146e-05	0.0196704	0.00011076	0.00010241	0.00103192	0.000110211	0.000779167	0.0613154	0.00646133	0.00176278	0.072397	0.0139439	1	1	1	1	1	1	3.09568	12.8324	1.483	5.78641	8.65297	2.21767	0.25629
PC(41:4)_vs_PC(39:6)	0.0731994	0.203622	0.463997	0.109275	0.304671	0.0185384	0.0572687	0.0797461	0.0318372	0.0523095	0.0530417	6.84944e-06	0.0276499	4.51752e-05	4.96534e-06	0.00139947	4.46034e-05	0.000217705	0.0757163	0.00416959	0.000415471	0.0822942	0.00978382	0.226956	1	1	0.164527	1	1	2.78175	6.33881	1.49284	4.1622	4.24615	1.52295	0.358665
PC(41:4)_vs_PC(39:7)	0.247499	0.719822	1.72655	0.369781	1.00649	0.0850752	0.269819	0.706641	0.151644	0.180561	0.0879764	0.00138173	0.0941882	3.50237e-05	0.00196952	0.0359311	4.9458e-05	0.00390753	0.171312	0.0036725	0.00828852	0.246876	0.0101445	1	1	1	1	1	1	2.90838	6.97598	1.49407	4.06665	4.66911	1.71541	0.367396
PC(41:4)_vs_PC(40:6)	0.00644753	0.0124669	0.0261025	0.0087651	0.0192624	0.00140571	0.00250309	0.00530996	0.00186774	0.00276477	0.0393613	3.55976e-05	0.0234705	1.5207e-05	5.67987e-05	0.0151767	3.26328e-05	0.000494976	0.0684409	0.00242025	0.00135788	0.18347	0.00840146	1	1	0.503885	1	1	1	1.93359	4.04846	1.35945	2.98756	2.97801	1.3551	0.455037
PC(41:4)_vs_PC(40:7)	0.0111141	0.024226	0.0532834	0.0150747	0.0342164	0.00177207	0.00437233	0.0133355	0.00318355	0.00492024	0.0282394	0.000138688	0.0175374	3.10962e-05	0.000191714	0.00820526	2.9354e-05	0.00100286	0.057193	0.00348801	0.0024117	0.146488	0.00811952	1	1	1	1	1	0.972646	2.17976	4.79423	1.35636	3.07866	3.53464	1.55725	0.440567
PC(42:5)_vs_PC(36:6)	1.32205	5.07308	26.4961	1.65562	10.7703	0.37642	2.18835	12.5822	0.727211	1.7239	0.0953686	0.00183511	0.309172	2.58661e-05	0.00194642	0.0159957	1.0691e-05	0.00473792	0.397132	0.00318615	0.00824	0.186298	0.00492007	1	1	0.857074	1	1	0.354245	3.83727	20.0417	1.25231	8.14665	16.0037	2.46011	0.153721
PC(42:5)_vs_PC(38:6)	0.085843	0.261766	0.614467	0.104847	0.389228	0.0239366	0.0761056	0.157296	0.0365998	0.0698529	0.0517927	9.33426e-05	0.276157	5.31262e-05	9.23893e-05	0.00829945	3.38756e-05	0.000807187	0.364836	0.00457231	0.00169134	0.14672	0.00844224	1	1	1	1	1	1	3.04936	7.15803	1.22138	4.53419	5.8606	1.57868	0.269372
PC(42:5)_vs_PC(40:6)	0.0909677	0.162463	0.350905	0.0984146	0.2822	0.0181359	0.0320048	0.0945318	0.022104	0.0497121	0.0462789	0.000274547	0.504355	9.6813e-05	0.000295423	0.127657	8.84323e-05	0.00146822	0.582175	0.00606736	0.00297352	0.410747	0.0127956	1	1	1	1	1	1	1.78594	3.85747	1.08186	3.1022	3.56558	1.24346	0.34874
PC(42:5)_vs_PC(40:7)	0.157614	0.315783	0.715962	0.16942	0.500924	0.024632	0.0562933	0.221926	0.0377574	0.0900851	0.0314456	0.000519359	0.503678	0.000144072	0.000536764	0.0462128	0.000100792	0.00213537	0.581511	0.00727718	0.0040215	0.27008	0.0136315	1	1	1	1	1	1	2.00352	4.5425	1.0749	3.17816	4.22595	1.42928	0.338216
PC(43:6)_vs_PC(36:3)	0.00396958	0.00572927	0.0163946	0.00407661	0.0098703	0.00138544	0.000916388	0.00594803	0.000990752	0.001257	0.0564213	0.00121536	0.871014	6.36867e-06	0.00139242	0.0269749	5.27943e-06	0.00358379	0.898566	0.00164864	0.00677101	0.222204	0.00363929	1	1	0.211026	1	1	0.174934	1.44329	4.13005	1.02696	2.48648	4.02162	1.661	0.413018
PC(43:6)_vs_PC(38:6)	0.00293427	0.00722632	0.0241165	0.00375385	0.0146144	0.000797533	0.00182589	0.00623555	0.00113345	0.00274825	0.0460131	9.2592e-05	0.146559	7.51981e-05	0.000102499	0.005938	6.74782e-05	0.000804203	0.233551	0.00543667	0.00176339	0.132763	0.0112924	1	1	1	1	1	1	2.46273	8.21892	1.27931	4.98058	6.42448	1.65019	0.256861
PC(43:6)_vs_PC(40:6)	0.0031174	0.00450335	0.0135205	0.00356785	0.0105728	0.000636019	0.000705706	0.00238132	0.000764705	0.00186684	0.0505858	1.20456e-05	0.254714	8.63623e-05	1.21733e-05	0.0296442	9.32019e-05	0.000290912	0.343954	0.00581423	0.000642133	0.228805	0.0130858	0.399131	1	1	0.403362	1	1	1.44459	4.33711	1.1445	3.39153	3.78954	1.27881	0.337457
PC(43:6)_vs_PC(40:7)	0.00539134	0.00876985	0.0274042	0.00612103	0.0186909	0.000840101	0.00130606	0.00520469	0.00111825	0.00285835	0.0305585	2.3123e-05	0.194573	4.50387e-05	2.33339e-05	0.00373236	3.91861e-05	0.000401328	0.283766	0.00416959	0.000892805	0.115333	0.009215	0.76618	1	1	0.773169	1	1	1.62665	5.08299	1.13534	3.46684	4.47705	1.46617	0.327486
PC(44:6)_vs_PC(36:3)	0.0286498	0.0834367	0.201598	0.0303113	0.116158	0.0110758	0.027027	0.0629998	0.0092689	0.0246288	0.0634613	0.000286783	0.766218	0.000110707	0.000319931	0.0107242	0.000163165	0.00150119	0.812176	0.00646133	0.00308525	0.161834	0.0162065	1	1	1	1	1	1	2.9123	7.03663	1.05799	4.05443	6.65092	1.73554	0.260948
PC(44:7)_vs_PC(38:6)	0.0263712	0.100075	0.329974	0.0424453	0.199223	0.0116048	0.0372338	0.0883528	0.0220903	0.0498735	0.0700081	8.59814e-05	0.122229	0.000267783	8.48599e-05	0.0077866	0.000238329	0.000773274	0.205701	0.00978714	0.00162623	0.144234	0.0203089	1	1	1	1	1	1	3.79488	12.5127	1.60953	7.55457	7.77411	1.65631	0.213054
PC(44:7)_vs_PC(40:5)	0.0333012	0.0631393	0.15856	0.0589716	0.138684	0.0135073	0.0146165	0.0184283	0.0395215	0.028259	0.045106	1.61725e-08	0.145721	7.31969e-05	0.000243205	0.176781	0.00151239	1.27973e-05	0.232652	0.0053305	0.00270514	0.473024	0.0449443	0.000535875	1	1	1	1	1	1.89601	4.76139	1.77086	4.16452	2.68875	1.14332	0.425224
PC(44:7)_vs_PC(40:6)	0.0276901	0.0617159	0.184238	0.039397	0.143073	0.010257	0.0177801	0.0264662	0.0158851	0.0291465	0.0645686	6.40608e-07	0.131671	8.6638e-05	2.51353e-07	0.0238614	7.75269e-05	6.91418e-05	0.21703	0.00581423	0.000110001	0.211322	0.0121894	0.0212265	1	1	0.00832857	1	1	2.22881	6.65358	1.42278	5.16692	4.67645	1.28773	0.275364
PC(44:7)_vs_PC(40:7)	0.0472814	0.119737	0.375172	0.0670191	0.253724	0.0141301	0.0322395	0.0739833	0.0258261	0.0513964	0.0504762	1.55977e-05	0.108764	0.000108214	1.06992e-05	0.00547678	7.87076e-05	0.000330032	0.189401	0.00639156	0.000617697	0.128613	0.0121894	0.51683	1	1	0.354516	1	1	2.53243	7.93487	1.41745	5.36625	5.59798	1.47866	0.264142
PC(45:5)_vs_PC(56:10)	0.0288833	0.0993806	0.504677	0.100076	0.214383	0.0185954	0.0366775	0.209763	0.0255115	0.0463826	0.0667294	0.000929075	9.46482e-05	6.60778e-05	0.00210871	0.00995326	0.000818135	0.0030341	0.00524443	0.00510219	0.00862513	0.155999	0.0359293	1	1	1	1	1	1	3.44076	17.473	3.46485	7.42237	5.04292	2.35409	0.466812
PC(46:5)_vs_PC(56:10)	0.236549	1.52391	5.2383	1.43683	2.9498	0.151899	0.540061	2.16338	0.428552	0.701366	0.049717	0.000850946	0.000157088	0.000159522	0.00318102	0.0316293	0.00174204	0.00288523	0.00642605	0.0076449	0.0111538	0.235122	0.0469468	1	1	1	1	1	1	6.44226	22.1447	6.07412	12.4702	3.64574	1.77581	0.487092
PC(46:9)_vs_PC(38:5)	0.00750026	0.0304691	0.0922111	0.00876295	0.0447793	0.00479359	0.0119469	0.0227972	0.00416108	0.0106089	0.0708136	4.29575e-05	0.608461	0.000117573	5.1657e-05	0.00089916	0.000179466	0.000544737	0.676397	0.00660109	0.00129573	0.0694491	0.0173877	1	1	1	1	1	1	4.0624	12.2944	1.16835	5.97036	10.5228	2.05923	0.195692
PC(46:9)_vs_PC(39:5)	0.202496	0.564197	1.42662	0.21571	0.775963	0.125558	0.215164	0.322379	0.0988229	0.194833	0.0846006	1.66945e-05	0.83069	0.000223291	2.69007e-05	0.00118883	0.000342706	0.000342954	0.86499	0.00903999	0.000963534	0.0772389	0.0249026	0.553171	1	1	0.891355	1	1	2.78621	7.04515	1.06525	3.83199	6.6136	1.83851	0.27799
PC(46:9)_vs_PC(39:6)	0.242961	0.911188	2.98914	0.311874	1.50786	0.149202	0.418778	0.868351	0.181783	0.386193	0.102681	0.000127098	0.453736	0.000225151	0.000133847	0.00313009	0.000239649	0.000954313	0.535285	0.00907184	0.00204962	0.108499	0.0203089	1	1	1	1	1	1	3.75035	12.303	1.28364	6.20618	9.58445	1.98238	0.206833
PC(46:9)_vs_PC(40:8)	0.168817	0.576579	1.82976	0.193453	0.818451	0.060837	0.182203	0.43466	0.107351	0.129259	0.0545656	4.51746e-05	0.60944	1.099e-05	3.44069e-05	0.00055903	3.26399e-06	0.000558947	0.677349	0.0020153	0.00109534	0.0607566	0.00277314	1	1	0.364153	1	1	0.108152	3.41542	10.8387	1.14594	4.84817	9.45838	2.23563	0.236365
PC(46:9)_vs_PC(42:10)	0.180718	0.760668	2.00883	0.24141	1.19989	0.0697628	0.213257	0.686657	0.132173	0.260057	0.0371118	0.000384715	0.310287	0.000126379	0.000401292	0.0206018	7.00525e-05	0.00177468	0.398163	0.00686794	0.00344477	0.200659	0.011491	1	1	1	1	1	1	4.20915	11.1158	1.33584	6.63958	8.32123	1.67418	0.201193
PC(46:9)_vs_PC(O-44:4)	1.46083	5.50411	16.7483	1.75842	12.6247	0.717238	1.86608	6.77885	0.967418	2.48476	0.0564125	0.0009438	0.526593	5.58506e-05	0.001008	0.17388	4.08898e-05	0.00306386	0.603092	0.00466426	0.00564904	0.469254	0.00929474	1	1	1	1	1	1	3.76781	11.465	1.20372	8.64219	9.52461	1.32663	0.139284
PC(50:2)_vs_PC(48:3)	0.0952214	0.211952	0.617054	0.123694	0.415359	0.0806144	0.0197448	0.191204	0.0996025	0.1062	0.00815336	0.000154216	0.567964	0.000170447	0.00018663	0.0387067	0.000418399	0.00106518	0.639814	0.00787693	0.00237845	0.252768	0.0278387	1	1	1	1	1	1	2.22589	6.48021	1.29902	4.36203	4.98854	1.48559	0.297801
PE(37:2)_vs_PE(32:1)	0.13281	0.166809	0.506732	0.171769	0.372292	0.0261831	0.0178891	0.102508	0.0346331	0.043005	0.0568584	4.06005e-05	0.0365611	2.29035e-06	5.96681e-05	0.0127761	4.64617e-06	0.000528604	0.090603	0.00106888	0.0013855	0.172767	0.00334676	1	1	0.0758906	1	1	0.153951	1.256	3.81547	1.29335	2.80319	2.95007	1.36112	0.461384
PE(37:2)_vs_PE(32:2)	1.20023	1.39057	7.7194	1.46214	4.14904	0.288367	0.236462	1.99889	0.249729	0.524438	0.328351	0.000113257	0.0948516	3.08859e-06	0.000149224	0.00269641	9.36583e-06	0.000900162	0.172054	0.00116978	0.0021368	0.102684	0.0045571	1	1	0.10234	1	1	0.310337	1.15859	6.43158	1.21821	3.45686	5.27952	1.86052	0.352404
PE(37:2)_vs_PE(34:3)	1.03042	1.07971	3.97588	1.10862	2.70854	0.254761	0.118117	0.872051	0.151336	0.22154	0.687547	5.74437e-05	0.501357	6.52138e-08	0.000100616	0.00779165	1.77695e-07	0.000629639	0.579477	0.000189886	0.00174733	0.144234	0.000588792	1	1	0.00216086	1	1	0.00588792	1.04783	3.85849	1.07589	2.62857	3.58634	1.4679	0.409304
PE(37:2)_vs_PE(36:5)	0.422415	0.823248	2.24068	0.492736	1.27331	0.124223	0.0783254	0.545877	0.10353	0.212654	0.000737405	7.92553e-05	0.273044	2.97124e-05	0.000112747	0.00253201	7.81771e-05	0.000746482	0.36183	0.00342643	0.00186235	0.09976	0.0121894	1	1	0.984521	1	1	1	1.94891	5.30445	1.16647	3.01436	4.54742	1.75973	0.386972
PE(37:2)_vs_PE(38:6)	0.0911726	0.146014	0.356219	0.100688	0.267846	0.0278684	0.0163045	0.114659	0.0297596	0.0468341	0.00664641	0.000673998	0.548488	4.34718e-05	0.000807005	0.0981978	5.73841e-05	0.002495	0.623211	0.00411553	0.00502065	0.368593	0.0108319	1	1	1	1	1	1	1.60151	3.90709	1.10437	2.93779	3.53784	1.32994	0.375919
PE(38:2)_vs_PE(30:0)	1.50923	1.93135	6.05797	2.17995	4.62642	0.527525	0.370182	2.32892	1.14113	0.989435	0.202341	0.00177119	0.193816	0.000179466	0.0035345	0.176086	0.00164604	0.0046298	0.282999	0.0081238	0.0118839	0.472218	0.0460999	1	1	1	1	1	1	1.27969	4.01394	1.44441	3.06541	2.77895	1.30943	0.471196
PE(38:2)_vs_PE(32:1)	0.152928	0.189561	0.83049	0.172153	0.481145	0.0355126	0.0257637	0.269753	0.0456646	0.0614787	0.122776	0.000510271	0.39754	3.78456e-06	0.000565449	0.0134204	2.81432e-06	0.002113	0.482277	0.00127038	0.00411964	0.175973	0.00261521	1	1	0.125401	1	1	0.0932525	1.23955	5.43059	1.12571	3.14622	4.82413	1.72607	0.357799
PE(38:2)_vs_PE(32:2)	1.40001	1.58403	12.778	1.47658	5.38247	0.465602	0.322549	5.07247	0.396693	0.849883	0.501184	0.000983214	0.746361	1.14405e-05	0.00102949	0.00800499	2.01303e-05	0.00314751	0.795378	0.00206965	0.0057143	0.145115	0.00687799	1	1	0.379081	1	1	0.667018	1.13144	9.12709	1.05469	3.84459	8.65382	2.37401	0.274331
PE(38:2)_vs_PE(36:6)	2.93179	5.27036	18.2163	2.95331	12.8862	0.883305	1.28668	7.25816	0.373868	2.68375	0.0679849	0.00133664	0.954113	0.000136729	0.00141262	0.10965	0.000239324	0.00382631	0.964453	0.00712255	0.00683248	0.385901	0.0203089	1	1	1	1	1	1	1.79766	6.21337	1.00734	4.39535	6.16811	1.41363	0.229183
PE(40:4)_vs_PE(32:3)	48.5522	96.9513	443.546	59.1476	247.697	17.486	17.9372	233.092	18.1983	58.777	0.0191699	0.00411928	0.288467	0.000249405	0.00468797	0.0698254	0.000322032	0.00824927	0.377119	0.00952879	0.0141626	0.320585	0.0239668	1	1	1	1	1	1	1.99685	9.13545	1.21823	5.10166	7.49897	1.79068	0.238791
PE(42:1)_vs_PE(38:7)	0.241609	0.408451	1.12316	0.393555	0.756961	0.05345	0.109618	0.327764	0.109632	0.145983	0.106987	0.000330519	0.00972784	0.000157478	0.000707428	0.0270361	0.00068325	0.00163181	0.0406164	0.00761756	0.00466485	0.222204	0.0336897	1	1	1	1	1	1	1.69054	4.64866	1.62889	3.13299	2.85388	1.48377	0.519915
PE(42:5)_vs_PE(32:1)	0.106619	0.170921	0.619632	0.129278	0.367617	0.0282973	0.0350861	0.155028	0.0324092	0.0309674	0.0628929	9.45357e-05	0.189217	1.49538e-08	0.000114905	0.0046489	3.93299e-08	0.000812565	0.278335	8.58107e-05	0.00188213	0.121965	0.000434399	1	1	0.000495496	1	1	0.0013032	1.60311	5.81168	1.21253	3.44797	4.79303	1.68554	0.351664
PE(42:5)_vs_PE(32:2)	0.970745	1.43322	9.45168	1.10688	4.11196	0.312075	0.385353	2.90423	0.268373	0.56018	0.157871	0.000227906	0.399094	3.00479e-06	0.000254648	0.00249537	6.7801e-06	0.00132812	0.48381	0.00116978	0.00276537	0.0994539	0.00423884	1	1	0.0995637	1	1	0.224658	1.47642	9.73652	1.14024	4.23588	8.53904	2.29858	0.269185
PE(42:5)_vs_PE(34:3)	0.827608	1.10486	4.77804	0.832898	2.68152	0.247669	0.220022	0.982299	0.150351	0.213161	0.148173	2.21029e-05	0.962433	1.62784e-08	3.23932e-05	0.00107805	3.19193e-08	0.000393119	0.970606	8.58107e-05	0.00105024	0.0738043	0.000434399	0.732381	1	0.000539384	1	1	0.00105765	1.33501	5.77332	1.00639	3.24009	5.73665	1.78184	0.310607
PE(42:5)_vs_PE(36:5)	0.334692	0.841343	2.66506	0.368999	1.25681	0.100581	0.153949	0.494867	0.0898855	0.184256	0.0164947	1.01563e-05	0.513931	7.26675e-06	1.22089e-05	0.000125052	1.31374e-05	0.000267087	0.59135	0.001725	0.000642133	0.0403481	0.00537415	0.336529	1	0.240784	0.404544	1	0.435306	2.51378	7.9627	1.1025	3.75511	7.2224	2.1205	0.2936
PE(42:5)_vs_PE(38:6)	0.071503	0.14936	0.431651	0.0743449	0.26531	0.0199391	0.0296364	0.135047	0.018853	0.0457194	0.0284803	0.000356447	0.788754	3.93364e-05	0.000377624	0.0166901	4.82645e-05	0.00169575	0.830934	0.00391036	0.00334829	0.188232	0.0101218	1	1	1	1	1	1	2.08887	6.03683	1.03975	3.71047	5.80606	1.62697	0.280219
PE(42:6)_vs_PE(32:1)	0.106436	0.169259	0.576647	0.123896	0.365997	0.0263387	0.0259024	0.131563	0.0249876	0.0748932	0.0259114	5.64065e-05	0.227382	0.000184044	7.32231e-05	0.00499769	0.000287213	0.000623721	0.317114	0.00822632	0.00153366	0.125453	0.0220808	1	1	1	1	1	1	1.59025	5.41781	1.16405	3.43867	4.65427	1.57555	0.338518
PE(42:6)_vs_PE(32:2)	0.967449	1.41608	8.64389	1.05634	4.03594	0.2939	0.313714	1.5632	0.192131	0.531494	0.10963	8.36785e-06	0.517693	2.50092e-06	1.14075e-05	0.000109173	1.08596e-05	0.000243499	0.594914	0.00110737	0.000631562	0.0403481	0.00492924	0.277269	1	0.0828681	0.377988	1	0.359834	1.46373	8.93472	1.09188	4.17173	8.1829	2.14173	0.261732
PE(42:6)_vs_PE(36:6)	1.99187	4.70823	12.6656	2.1644	9.69048	0.37894	1.19788	5.38849	0.449029	2.05782	0.0537229	0.00190294	0.452686	0.000206077	0.00205311	0.214112	0.00021161	0.00485774	0.534275	0.00870964	0.00849405	0.514751	0.019423	1	1	1	1	1	1	2.36372	6.35864	1.08662	4.86501	5.85179	1.30701	0.223353
PE(42:6)_vs_PE(38:6)	0.07156	0.147932	0.40444	0.0718006	0.261482	0.0192796	0.0211096	0.123978	0.0191833	0.0498511	0.00814972	0.000338383	0.981716	9.35849e-05	0.000340241	0.0228958	9.50346e-05	0.00165058	0.985642	0.00599919	0.00319655	0.208826	0.0131554	1	1	1	1	1	1	2.06725	5.65176	1.00336	3.65403	5.63283	1.54672	0.274591
PE(42:7)_vs_PE(30:1)	2.45346	3.9935	14.2316	3.51606	7.3803	1.37979	1.03636	7.05464	0.903686	1.68158	0.107881	0.00412723	0.118082	0.000215145	0.00677204	0.0427414	0.00126593	0.00825869	0.200732	0.00894411	0.017996	0.261733	0.0420058	1	1	1	1	1	1	1.6277	5.80062	1.4331	3.00812	4.04759	1.92832	0.476412
PE(42:7)_vs_PE(32:1)	0.123536	0.201545	0.769494	0.16562	0.422416	0.0535116	0.034279	0.290215	0.0362574	0.0447232	0.0322731	0.000920269	0.114104	2.91534e-07	0.00141914	0.0191527	7.22995e-07	0.0030205	0.195808	0.00043909	0.0068477	0.196177	0.00108893	1	1	0.00965999	1	1	0.0239564	1.63147	6.22892	1.34066	3.41938	4.64614	1.82165	0.392078
PE(42:7)_vs_PE(32:2)	1.111	1.68817	11.5788	1.42108	4.71673	0.4768	0.403569	4.1395	0.325573	0.64134	0.112835	0.000502479	0.184085	1.07901e-06	0.000614695	0.00436436	7.57845e-06	0.00209561	0.272696	0.000674584	0.00431307	0.119722	0.00444155	1	1	0.0357529	1	1	0.251112	1.51951	10.422	1.2791	4.24549	8.1479	2.45483	0.301284
PE(42:7)_vs_PE(34:3)	0.932618	1.30231	5.84037	1.07766	3.08389	0.310892	0.204677	1.66967	0.235496	0.353796	0.0686015	0.000188538	0.345955	3.75203e-07	0.000246363	0.00426168	1.43953e-06	0.00119358	0.432738	0.000493565	0.0027229	0.11948	0.00193956	1	1	0.0124323	1	1	0.0476989	1.3964	6.26234	1.15553	3.30671	5.41947	1.89383	0.349449
PE(42:7)_vs_PE(36:5)	0.376427	0.99217	3.23325	0.476522	1.44351	0.113354	0.140008	0.741629	0.13123	0.219712	0.00546003	4.15842e-05	0.153172	1.06193e-05	4.79168e-05	0.000448089	1.41345e-05	0.000535026	0.24083	0.0020153	0.00125017	0.0558291	0.00564273	1	1	0.351869	1	1	0.468346	2.63576	8.58932	1.26591	3.83476	6.78511	2.23986	0.330114
PE(42:7)_vs_PE(36:6)	2.24562	5.60557	16.5318	2.89887	11.3814	0.543613	1.46184	8.12411	0.720938	2.54823	0.0505119	0.00345205	0.0815894	0.000237278	0.00429498	0.154183	0.000286327	0.00728698	0.155532	0.00929339	0.0134044	0.446578	0.0220638	1	1	1	1	1	1	2.49622	7.36181	1.2909	5.06825	5.70286	1.45253	0.254703
PE(42:7)_vs_PE(38:6)	0.0799343	0.176028	0.519902	0.0958201	0.304087	0.0206549	0.0271756	0.183372	0.0281216	0.0500665	0.0114175	0.000671499	0.253615	3.158e-05	0.000779667	0.0202359	2.47513e-05	0.00249357	0.342897	0.00348801	0.00493114	0.199203	0.00762356	1	1	1	1	1	0.820135	2.20216	6.50412	1.19874	3.80421	5.42582	1.70971	0.315107
PE(44:1)_vs_PE(32:1)	0.0164606	0.0200915	0.0831127	0.0323871	0.0666889	0.00291398	0.00562438	0.0254652	0.0144603	0.0125902	0.381882	0.000415943	0.0265522	0.000130088	0.00114768	0.166426	0.000802637	0.00186046	0.0738025	0.00690781	0.0060719	0.461476	0.0358914	1	1	1	1	1	1	1.22058	5.0492	1.96756	4.05143	2.56623	1.24628	0.485645
PE(44:1)_vs_PE(34:3)	0.128211	0.129932	0.648206	0.201326	0.487411	0.0284251	0.0363433	0.19515	0.0609324	0.0955082	0.946238	0.000359341	0.0193692	0.00014214	0.000622098	0.0861184	0.000199566	0.00170449	0.0607133	0.0072251	0.00434145	0.348971	0.0189474	1	1	1	1	1	1	1.01342	5.05577	1.57027	3.80163	3.21969	1.3299	0.413051
PE(44:1)_vs_PE(36:5)	0.0517509	0.0988647	0.364001	0.0928903	0.227751	0.0116913	0.0261158	0.111502	0.0405566	0.0479207	0.0783524	0.000289297	0.0365816	0.00019231	0.000384264	0.0179642	0.000299642	0.00150934	0.0906199	0.00841528	0.00337377	0.19229	0.0227721	1	1	1	1	1	1	1.91039	7.03371	1.79495	4.40091	3.91861	1.59824	0.407859
PE(44:1)_vs_PE(38:6)	0.0112285	0.0175678	0.0591242	0.0190141	0.0473811	0.00307409	0.00492997	0.0235148	0.00868593	0.00600684	0.141401	0.00157849	0.0580681	2.4826e-06	0.00320796	0.244002	3.03309e-05	0.00427663	0.123016	0.00110737	0.011215	0.546469	0.00817086	1	1	0.0822609	1	1	1	1.56458	5.26556	1.69338	4.21973	3.1095	1.24784	0.401301
PE(44:1)_vs_PE(38:7)	0.131131	0.191653	0.706981	0.203026	0.55214	0.0306459	0.0709438	0.251463	0.0716691	0.0842502	0.274298	0.000855214	0.0401015	2.11625e-05	0.00142003	0.166464	1.25683e-05	0.00289336	0.0963081	0.00287795	0.00685056	0.461494	0.00527153	1	1	0.701219	1	1	0.416451	1.46154	5.39141	1.54827	4.2106	3.48221	1.28044	0.367709
PE(44:10)_vs_PE(32:2)	0.467283	0.505408	6.27766	0.55251	2.4403	0.283096	0.205848	1.75168	0.132344	0.61406	0.820387	9.84857e-05	0.489926	0.000197174	0.000125899	0.000731734	0.000511296	0.000830598	0.569125	0.0085025	0.00198626	0.0656475	0.030318	1	1	1	1	1	1	1.08159	13.4344	1.18239	5.22231	11.3621	2.5725	0.226411
PE(44:10)_vs_PE(34:4)	1.08271	1.32227	12.2041	1.24184	5.28608	0.454058	0.464463	2.67417	0.342066	0.968166	0.4961	2.48936e-05	0.474245	2.87461e-05	3.07601e-05	0.000244949	6.33054e-05	0.000416614	0.554152	0.00339994	0.00102723	0.0475559	0.0110888	0.82485	1	0.952501	1	1	1	1.22126	11.2718	1.14697	4.88227	9.82742	2.30872	0.234927
PE(44:2)_vs_PE(32:1)	0.00430642	0.034098	0.13101	0.0275499	0.0962088	0.00204146	0.00596864	0.03468	0.0107078	0.0201532	0.0101973	6.80624e-05	0.00104637	9.19994e-05	0.000120495	0.048726	0.000108186	0.000683615	0.0130527	0.00594054	0.00193721	0.275942	0.0139439	1	1	1	1	1	1	7.91795	30.422	6.3974	22.3408	4.75538	1.36173	0.286355
PE(44:2)_vs_PE(32:2)	0.0387323	0.285456	1.98188	0.227282	1.065	0.017636	0.0685112	0.59358	0.0669332	0.198486	0.0221914	0.0001297	0.000198399	5.06141e-05	0.000211094	0.00554192	6.40888e-05	0.000966623	0.00701595	0.00441342	0.00252512	0.129227	0.0110888	1	1	1	1	1	1	7.36998	51.1687	5.86801	27.4964	8.71994	1.86092	0.21341
PE(44:2)_vs_PE(34:3)	0.0333254	0.220489	1.02931	0.174688	0.699575	0.0156359	0.0374176	0.287732	0.0545259	0.132288	0.00899884	9.30071e-05	0.000309888	5.44951e-05	0.000175937	0.0245284	6.59269e-05	0.000805697	0.00832578	0.00464189	0.0023122	0.213882	0.0110888	1	1	1	1	1	1	6.61624	30.8866	5.2419	20.9923	5.89225	1.47133	0.249706
PE(44:2)_vs_PE(34:4)	0.0978394	0.753688	3.87958	0.508066	2.32958	0.0544696	0.135803	0.881816	0.144914	0.419043	0.0100111	2.69229e-05	0.000137049	4.0115e-05	4.20478e-05	0.00263028	5.2113e-05	0.00043117	0.00614494	0.00391699	0.00118373	0.101342	0.0103399	0.892091	1	1	1	1	1	7.70331	39.6525	5.19286	23.8102	7.63597	1.66536	0.218094
PE(44:9)_vs_PE(34:4)	1.66156	2.04514	13.6949	1.88205	7.19939	0.466957	0.769538	3.71602	0.634717	1.46341	0.487806	0.000122666	0.474577	0.000127057	0.000123611	0.0027374	0.0001027	0.000936958	0.554482	0.00686794	0.00196821	0.103192	0.0138332	1	1	1	1	1	1	1.23086	8.24218	1.1327	4.33291	7.27658	1.90223	0.261418
PE(46:4)_vs_PE(34:3)	0.0183789	0.175206	0.745345	0.23392	0.581642	0.0190148	0.0400821	0.262799	0.0819714	0.146182	0.0143383	0.000321277	0.000325507	0.000199865	0.00161679	0.189294	0.0010016	0.00160596	0.00847265	0.00854679	0.00738523	0.487391	0.0388165	1	1	1	1	1	1	9.53299	40.5543	12.7276	31.6472	3.18632	1.28145	0.402172
PE(46:4)_vs_PE(34:4)	0.0508192	0.596392	2.82171	0.671002	1.92113	0.0449037	0.119948	0.893976	0.183592	0.407113	0.0119019	0.000173964	6.85547e-05	8.72972e-05	0.000575623	0.0415192	0.000267573	0.00114189	0.0044881	0.00581423	0.00415775	0.260664	0.0215674	1	1	1	1	1	1	11.7356	55.5244	13.2037	37.8031	4.20521	1.46878	0.349275
PE(46:4)_vs_PE(37:5)	0.0230682	0.386056	1.0466	0.307403	0.810475	0.0213685	0.0706275	0.286479	0.127395	0.193181	0.0101175	7.58923e-05	0.000928257	0.000157028	0.000215362	0.106966	0.000509201	0.000728365	0.0124628	0.00761756	0.00255405	0.382109	0.030318	1	1	1	1	1	1	16.7355	45.3699	13.3259	35.1339	3.40465	1.29134	0.379288
PE(46:5)_vs_PE(32:1)	0.0120953	0.0617483	0.201379	0.0457606	0.159206	0.00669898	0.0172216	0.069474	0.0157995	0.0363949	0.0311971	0.000340662	0.000803291	0.000139658	0.000829484	0.194572	0.000257574	0.00165511	0.0117434	0.00716341	0.00508792	0.493882	0.021178	1	1	1	1	1	1	5.10516	16.6494	3.78335	13.1626	4.4007	1.2649	0.287431
PE(46:5)_vs_PE(34:3)	0.0910584	0.399069	1.55031	0.292565	1.16602	0.0398844	0.10992	0.415987	0.0824803	0.297073	0.0339049	8.16741e-05	0.000293492	0.000269706	0.000154924	0.0797796	0.000554575	0.000756073	0.00815843	0.00978827	0.00217426	0.339301	0.0313935	1	1	1	1	1	1	4.38256	17.0254	3.21294	12.8052	5.29901	1.32957	0.25091
PE(46:5)_vs_PE(34:4)	0.258584	1.36257	5.86981	0.843267	3.90743	0.135067	0.364903	1.3414	0.16733	0.988412	0.0286975	2.91056e-05	1.39366e-05	0.000243549	5.26081e-05	0.011698	0.000537929	0.000450029	0.00209904	0.00938373	0.00130672	0.167035	0.0310566	0.964413	0.461788	1	1	1	1	5.26935	22.6999	3.2611	15.1109	6.96079	1.50222	0.215811
PE(46:5)_vs_PE(36:5)	0.0363379	0.303625	0.865558	0.132406	0.540136	0.0176004	0.0789301	0.206659	0.0526222	0.111712	0.0257797	3.823e-05	0.00226054	8.62087e-05	4.85776e-05	0.00531213	8.62355e-05	0.000513287	0.0189278	0.00581423	0.00126047	0.127311	0.0126434	1	1	1	1	1	1	8.35559	23.8197	3.64375	14.8643	6.53714	1.60248	0.245135
PE(46:5)_vs_PE(37:5)	0.116645	0.878069	2.23151	0.38011	1.63074	0.0621811	0.204713	0.682009	0.124769	0.345621	0.0199026	0.00016618	0.000788542	9.39861e-05	0.000301404	0.0707537	0.000139458	0.00110926	0.011658	0.00599919	0.00300362	0.321849	0.0151496	1	1	1	1	1	1	7.52767	19.1307	3.25868	13.9803	5.87071	1.3684	0.23309
PE(46:6)_vs_PE(32:1)	0.0250686	0.0698963	0.143823	0.0485537	0.110454	0.00996468	0.0116692	0.0353065	0.0180491	0.021677	0.00752112	6.13161e-05	0.0140261	5.58838e-05	0.000136022	0.0635108	0.00026447	0.000651226	0.0499307	0.00466426	0.00205241	0.307296	0.0214785	1	1	1	1	1	1	2.7882	5.73719	1.93683	4.40607	2.96215	1.30211	0.439583
PE(46:6)_vs_PE(32:2)	0.227622	0.585295	2.1612	0.412292	1.22543	0.0949759	0.1378	0.455102	0.139071	0.204735	0.0288313	1.88563e-05	0.0149352	1.39769e-05	2.32106e-05	0.000979009	2.28652e-05	0.000364231	0.0519283	0.0022927	0.000890223	0.0709835	0.00750138	0.624805	1	0.463125	0.769083	1	0.75764	2.57135	9.49468	1.8113	5.38361	5.24192	1.76363	0.336447
PE(46:6)_vs_PE(34:3)	0.193648	0.451742	1.11103	0.308058	0.804463	0.0746663	0.0704766	0.190698	0.079177	0.146853	0.00614942	2.91503e-06	0.0166543	3.14728e-05	6.80371e-06	0.00754427	0.000111097	0.000142531	0.0554065	0.00348801	0.000477629	0.143366	0.0139439	0.0965895	1	1	0.225441	1	1	2.33279	5.73735	1.59081	4.15424	3.60656	1.38108	0.382936
PE(46:6)_vs_PE(34:4)	0.539306	1.54877	4.23817	0.891578	2.71168	0.186728	0.303426	0.665889	0.141174	0.632544	0.0170018	2.26142e-06	0.00209023	0.000233666	6.4717e-06	0.00144751	0.000698682	0.000128067	0.0180977	0.00925033	0.000465013	0.0825146	0.034106	0.0749322	1	1	0.21444	1	1	2.87178	7.85856	1.6532	5.02808	4.75356	1.56293	0.328792
PE(O-38:3)_vs_PE(O-33:2)	21.5724	23.668	77.0741	22.0422	61.097	6.9006	23.6652	26.3268	5.5012	11.6406	0.893218	0.00110367	0.890432	9.18689e-05	0.00125348	0.183165	0.000145349	0.00336718	0.914419	0.00594054	0.00638485	0.480427	0.015338	1	1	1	1	1	1	1.09715	3.57282	1.02178	2.83219	3.49666	1.2615	0.360774
PE(O-38:3)_vs_PE(O-36:5)	0.152493	0.265954	1.14004	0.193467	0.711145	0.0571168	0.0418198	0.198568	0.0673313	0.109896	0.0154702	4.54333e-06	0.243676	7.58927e-06	4.39887e-06	0.000700036	7.96039e-06	0.000175063	0.333205	0.00177092	0.000395151	0.0651601	0.00444155	0.150543	1	0.25147	0.145756	1	0.263768	1.74403	7.47601	1.26869	4.66345	5.89269	1.60311	0.27205
PE(O-40:4)_vs_PE(O-33:2)	102.337	210.485	477.421	142.259	334.596	48.0613	225.751	186.97	20.4747	80.4511	0.494743	0.00146908	0.0773624	0.000275255	0.00307706	0.10241	0.00163581	0.00407414	0.149977	0.00989215	0.0109257	0.375248	0.0460689	1	1	1	1	1	1	2.05678	4.66517	1.3901	3.26954	3.356	1.42686	0.425166
PE(O-40:4)_vs_PE(O-36:5)	0.761005	2.26507	7.03758	1.27185	3.89056	0.440223	0.527244	1.48534	0.504045	0.91836	0.018867	1.28922e-05	0.0667521	0.000128802	1.838e-05	0.000862272	0.000328547	0.000301044	0.135396	0.00689474	0.000794233	0.0683526	0.024192	0.427182	1	1	0.609021	1	1	2.97642	9.24774	1.67128	5.1124	5.53332	1.80889	0.326908
PE(O-40:4)_vs_PE(O-37:5)	2.69928	5.9307	11.9963	3.8127	8.97384	1.26474	0.811854	1.49855	0.757895	0.989567	0.00276851	3.96714e-08	0.0741721	7.55827e-07	4.73013e-07	0.00132247	1.91169e-06	1.57481e-05	0.14546	0.00055654	0.000154609	0.0806755	0.00226228	0.00131451	1	0.0250443	0.0156733	1	0.0633439	2.19714	4.44426	1.41249	3.32453	3.14641	1.33681	0.424868
PE(O-40:4)_vs_PE(O-39:5)	1.61634	2.13077	3.49755	2.13368	3.38916	0.583331	0.247565	0.602538	0.318025	0.45478	0.0863516	6.90222e-05	0.0685364	7.40042e-05	0.000478014	0.719301	0.000331722	0.000689603	0.137867	0.00536571	0.00376537	0.882387	0.0243717	1	1	1	1	1	1	1.31827	2.16387	1.32007	2.09682	1.63921	1.03198	0.629559
PE(O-42:3)_vs_PE(30:1)	0.482349	0.652009	1.95213	0.563984	1.13416	0.224607	0.504339	0.799464	0.282202	0.12103	0.624702	0.0023045	0.560969	7.5812e-05	0.00294156	0.0351514	0.00111051	0.00553818	0.633593	0.00546094	0.0106221	0.244971	0.0400837	1	1	1	1	1	1	1.35174	4.04713	1.16924	2.35132	3.46132	1.72122	0.497271
PE(O-42:4)_vs_PE(O-34:3)	4.20007	8.88776	20.8105	6.56944	14.911	1.54511	0.67705	7.15706	1.46757	3.3864	0.000171266	0.000692469	0.0123636	0.000220261	0.00164589	0.0847002	0.00100136	0.0025362	0.0462535	0.00897706	0.00747691	0.347456	0.0388165	1	1	1	1	1	1	2.1161	4.95479	1.56413	3.55018	3.16777	1.39564	0.440576
PE(O-42:4)_vs_PE(O-36:5)	0.113019	0.321236	1.28575	0.219974	0.662206	0.0562249	0.0727965	0.219632	0.114797	0.135411	0.0202473	3.43766e-06	0.055034	5.69534e-05	1.15329e-06	9.02173e-05	9.3119e-05	0.000152011	0.118652	0.00467949	0.00022479	0.0373669	0.0130858	0.113907	1	1	0.0382144	1	1	2.84232	11.3764	1.94635	5.85924	5.84502	1.94162	0.332184
PE(O-42:4)_vs_PE(O-37:5)	0.402863	0.841113	2.20998	0.646692	1.55272	0.155271	0.108	0.271963	0.183456	0.311499	0.00262253	5.08643e-08	0.0202925	7.20351e-05	1.09994e-07	0.00240083	0.000266029	1.78741e-05	0.0625017	0.00529243	8.22323e-05	0.0985944	0.0215065	0.00168539	1	1	0.00364466	1	1	2.08784	5.48569	1.60524	3.85421	3.41737	1.4233	0.416489
PE(O-42:4)_vs_PE(O-39:5)	0.246288	0.302591	0.644158	0.361006	0.581691	0.0835896	0.0369099	0.117361	0.0856226	0.0875063	0.17859	1.6598e-05	0.0261156	2.7492e-05	0.000317021	0.296516	0.000868535	0.000342237	0.0730183	0.00330054	0.00306521	0.596252	0.0368095	0.549975	1	0.910949	1	1	1	1.22861	2.61547	1.46579	2.36183	1.78434	1.10739	0.620615
PE(O-42:5)_vs_PE(O-34:3)	8.13882	15.9725	31.003	10.1493	24.8756	2.31739	1.83251	9.46185	1.97212	3.87564	0.00245124	0.000519322	0.106609	1.61939e-05	0.000936898	0.154857	5.72134e-05	0.00213537	0.186667	0.00245243	0.00541976	0.447201	0.0108319	1	1	0.536586	1	1	1	1.96251	3.80927	1.24703	3.05641	3.05468	1.24632	0.408004
PE(O-42:5)_vs_PE(O-37:6)	3.44946	6.29742	12.4684	3.70568	9.60674	1.06474	0.638667	2.76269	0.53096	1.85699	0.00153434	4.97792e-05	0.583067	0.000114189	0.000118484	0.0496855	0.000362396	0.000589084	0.653429	0.00652354	0.00191792	0.277891	0.0256101	1	1	1	1	1	1	1.82562	3.61459	1.07428	2.785	3.36467	1.29788	0.385738
PE(O-42:5)_vs_PE(O-39:6)	0.233548	0.437104	0.884291	0.29506	0.698412	0.073911	0.0570032	0.134743	0.0528172	0.144308	0.00513943	1.03443e-06	0.101088	0.000165299	5.88512e-06	0.0372312	0.000580103	8.6658e-05	0.179889	0.00775806	0.000446008	0.249224	0.0319829	0.0342758	1	1	0.195003	1	1	1.87158	3.78633	1.26338	2.99044	2.99699	1.26614	0.422472
SM(d44:3)_vs_SM(17:0)_OH	25.7864	63.2246	94.8625	45.9465	109.974	14.4414	14.4049	30.4312	19.8149	25.6761	0.0210686	0.000495053	0.0523461	0.000126992	0.00490633	0.35238	0.000681993	0.00207744	0.114639	0.00686794	0.0146092	0.645245	0.0336779	1	1	1	1	1	1	2.45186	3.67878	1.78181	4.26481	2.06463	0.862589	0.417793
PA(40:4)_vs_PA(32:1)	0.131394	0.291735	0.93175	0.144476	0.395997	0.0435835	0.104619	0.341337	0.060761	0.0712638	0.108252	0.000747607	0.652573	4.61439e-05	0.000763498	0.00549407	4.93796e-05	0.00266451	0.715378	0.00421206	0.00486884	0.128696	0.0101445	1	1	1	1	1	1	2.22031	7.09128	1.09956	3.01382	6.44918	2.35292	0.364841
PA(40:4)_vs_PA(38:4)	0.0341311	0.0616813	0.243032	0.0356753	0.118195	0.0144733	0.0105731	0.0589514	0.00956863	0.0270776	0.0181008	5.06603e-05	0.818414	0.000196655	6.95264e-05	0.000802054	0.000373885	0.000595047	0.855003	0.00849564	0.00149145	0.0675059	0.0260719	1	1	1	1	1	1	1.80719	7.12055	1.04524	3.46296	6.81234	2.0562	0.301835
PA(42:4)_vs_PA(32:2)	0.0646303	0.361811	2.28464	0.0693505	0.651955	0.0231076	0.0180452	1.19517	0.0333217	0.1603	3.86782e-06	0.00266858	0.764022	0.000249208	0.00269346	0.0109028	0.000224582	0.00611437	0.810263	0.00952879	0.0100902	0.161948	0.0201805	1	1	1	1	1	1	5.59815	35.3493	1.07303	10.0874	32.9434	3.50429	0.106373
BMP(40:4)_vs_BMP(40:7)	0.00744765	0.0138153	0.059386	0.00914364	0.0352992	0.0022297	0.00524656	0.0267163	0.00292158	0.00822282	0.162384	0.00207856	0.247152	0.000270549	0.00242019	0.0565439	0.000293453	0.005166	0.336648	0.00978888	0.00942963	0.292597	0.0225083	1	1	1	1	1	1	1.85499	7.97379	1.22772	4.73964	6.49479	1.68236	0.259033
BMP(43:7)_vs_BMP(43:8)	0.172481	0.242621	0.528927	0.200222	0.420759	0.0305633	0.0412055	0.0771682	0.0618649	0.0644092	0.0768841	3.82731e-06	0.315915	6.01201e-05	1.96854e-06	0.0187429	7.37431e-05	0.000159922	0.403631	0.00484691	0.000272919	0.194746	0.0118615	0.126818	1	1	0.0652276	1	1	1.40666	3.06658	1.16083	2.43945	2.64171	1.25708	0.475858
BMP(43:6)_vs_BMP(40:5)	0.00201421	0.00645359	0.0205567	0.00330884	0.0119687	0.00185372	0.00561397	0.00400903	0.00207648	0.00275925	0.302688	2.48247e-06	0.242363	4.85026e-05	3.26493e-06	0.000917674	0.000125735	0.000133774	0.331847	0.00430949	0.000347857	0.0700625	0.0145164	0.0822566	1	1	0.108184	1	1	3.20403	10.2058	1.64274	5.94213	6.21268	1.71754	0.276457
BMP(43:6)_vs_BMP(43:8)	0.0108352	0.0332252	0.116795	0.0163873	0.0795437	0.00995745	0.0312484	0.0242389	0.0105311	0.0211568	0.339721	5.26987e-06	0.330867	0.000179005	6.90975e-06	0.0130212	0.000278354	0.00018939	0.418525	0.0081238	0.000482009	0.173765	0.0217018	0.174617	1	1	0.228954	1	1	3.06642	10.7793	1.51241	7.34124	7.12721	1.46832	0.206016
BMP(44:7)_vs_BMP(43:8)	0.0887762	0.230485	0.87112	0.11993	0.579256	0.0449019	0.0779869	0.217211	0.0718345	0.104001	0.0721724	5.26529e-05	0.353353	2.06622e-05	4.19866e-05	0.0117913	9.60631e-06	0.000606067	0.440163	0.00287795	0.00118301	0.167059	0.0045571	1	1	0.684643	1	1	0.318305	2.59624	9.81255	1.35093	6.5249	7.26356	1.50386	0.207042
BMP(44:7)_vs_BMP(44:10)	0.00361282	0.00648412	0.0221429	0.0046194	0.0200013	0.00132868	0.00197552	0.00365938	0.00176139	0.00311399	0.110361	2.43324e-06	0.252375	1.06816e-05	1.66502e-06	0.278507	7.14037e-06	0.000132826	0.341706	0.0020153	0.000256606	0.580578	0.00438141	0.0806253	1	0.353935	0.0551703	1	0.236596	1.79475	6.12897	1.27861	5.5362	4.79345	1.10707	0.230955
BMP(44:7)_vs_BMP(44:9)	0.0179504	0.0250307	0.0568093	0.0208021	0.057053	0.00582103	0.00591641	0.00377937	0.0069577	0.00847202	0.16039	2.82714e-08	0.422302	6.84255e-06	5.83557e-07	0.949972	9.62718e-06	1.44393e-05	0.505636	0.00169294	0.00016761	0.984712	0.0045571	0.000936772	1	0.226728	0.0193362	1	0.318997	1.39444	3.1648	1.15887	3.17838	2.73094	0.995728	0.364611
BMP(46:9)_vs_BMP(46:10)	0.0785778	0.148755	0.456014	0.12957	0.383543	0.0637198	0.0773241	0.065107	0.0859235	0.0985882	0.254111	1.32236e-07	0.23318	0.000156986	5.81093e-06	0.161033	0.000600329	3.02777e-05	0.322552	0.00761756	0.000442633	0.454457	0.0325428	0.00438163	1	1	0.192545	1	1	1.89309	5.80334	1.64893	4.88106	3.51945	1.18895	0.337823
LPG(20:2)_vs_PG(34:2)	0.0827881	0.098161	0.388977	0.111715	0.240821	0.0454101	0.0173623	0.12416	0.0442966	0.0512665	0.46151	0.000349326	0.250901	0.000154347	0.000665799	0.0198038	0.000700323	0.00167631	0.340359	0.00756552	0.0045115	0.19771	0.034106	1	1	1	1	1	1	1.18569	4.69847	1.34941	2.90889	3.48186	1.61521	0.463893
LPG(20:2)_vs_PG(36:5)	0.396769	0.565821	1.82803	0.639418	1.76725	0.131347	0.178396	0.559591	0.375157	0.282116	0.23628	0.000380699	0.147732	1.41374e-05	0.000778094	0.80634	7.37226e-05	0.0017637	0.234797	0.0023076	0.00492495	0.92506	0.0118615	1	1	0.468442	1	1	1	1.42607	4.60729	1.61156	4.4541	2.8589	1.03439	0.361815
LPG(22:3)_vs_PG(36:5)	0.106718	0.26755	1.5764	0.217216	1.04486	0.0740336	0.15084	0.546021	0.144457	0.218091	0.198213	0.000345165	0.105409	5.69498e-05	0.000417817	0.0452187	3.38862e-05	0.00166599	0.185283	0.00467949	0.00352035	0.267128	0.00844224	1	1	1	1	1	1	2.50707	14.7716	2.03543	9.79084	7.25726	1.50872	0.207891
PI(39:4)_vs_PI(37:4)	0.262102	0.313022	1.03257	0.35878	0.759003	0.0477541	0.0305847	0.263964	0.0370054	0.118293	0.0893098	0.000198866	0.00132365	4.85892e-05	0.000460945	0.0369215	0.000239432	0.00122731	0.014319	0.00430949	0.0037006	0.248302	0.0203089	1	1	1	1	1	1	1.19427	3.93955	1.36886	2.89583	2.87799	1.36042	0.472699
PI(39:4)_vs_PI(38:4)	0.00637196	0.0094595	0.02179	0.00881116	0.0176772	0.00065625	0.000670849	0.00403353	0.00108916	0.0021512	0.00317277	4.23152e-05	0.000504471	2.16776e-05	8.50008e-05	0.0430471	3.37829e-05	0.00053959	0.00985012	0.00289632	0.00162623	0.262372	0.00844224	1	1	0.718288	1	1	1	1.48455	3.41966	1.3828	2.77422	2.473	1.23266	0.498447
PI(41:4)_vs_PI(40:4)	0.00618665	0.00949923	0.0145504	0.00694223	0.0164356	0.00373869	0.00268545	0.00175405	0.00281447	0.0024625	0.170345	0.00055018	0.677378	0.000126897	0.000117935	0.152325	4.53808e-05	0.00221452	0.736962	0.00686794	0.00191463	0.44442	0.00978382	1	1	1	1	1	1	1.53544	2.35191	1.12213	2.65662	2.09593	0.8853	0.42239
