# Supplementary material for: Functional characterisation of peroxisomal β-oxidation disorders in fibroblasts using lipidomics
Source: J Inherit Metab Dis. 2017 Aug 28;41(3):479–87. doi: 10.1007/s10545-017-0076-9 (PMC5959964; doi:10.1007/s10545-017-0076-9)
Supplement: Supplementary file 6 — (XLSX 22 kb) [file 10545_2017_76_MOESM6_ESM.xlsx]

## Sheet: 20161030_46 common ratios PEDan
ratio.name	avg.ratio.Ctrl	avg.ratio.mildPEX	avg.ratio.sevPEX	sd.ratio.Ctrl	sd.ratio.mildPEX	sd.ratio.sevPEX	pval_mildPEX_vs_CTRL	pval_severePEX_vs_CTRL	pval_mildPEX_vs_severePEX	qval_mildPEX_vs_CTRL	qval_severePEX_vs_CTRL	qval_mildPEX_vs_severePEX	bonf_mildPEX_vs_CTRL	bonf_severePEX_vs_CTRL	bonf_mildPEX_vs_severePEX	FC_mildPEX_vs_CTRL	FC_severePEX_vs_CTRL	FC_severePEX_vs_mildPEX
LPC(30:2)_vs_LPC(29:1)	0.0325009	0.992655	1.24557	0.0122827	0.166871	0.183235	4.69727e-06	2.06988e-06	0.0194352	0.000175665	0.000158208	0.105001	0.109075	0.0480647	1	30.5424	38.3243	1.25479
LPC(30:1)_vs_LPC(29:1)	0.00873328	2.66893	3.21896	0.00326556	0.286643	0.388242	2.99344e-07	5.95164e-07	0.0117035	3.9794e-05	8.24989e-05	0.0908442	0.00695106	0.0138203	1	305.605	368.586	1.20609
LPC(25:0)_vs_LPC(24:0)	0.0766291	0.205014	0.225949	0.0141726	0.0289116	0.0181505	2.91984e-06	1.83547e-09	0.135473	0.000139509	1.57857e-06	0.249708	0.0678016	4.26215e-05	1	2.67541	2.9486	1.10211
LPC(25:0)_vs_LPC(23:0)	1.07469	4.709	3.87756	0.136945	1.06493	0.802533	9.00161e-05	7.0883e-05	0.126864	0.000799336	0.00090115	0.24008	1	1	1	4.38174	3.60808	0.823436
LPC(30:0)_vs_LPC(29:1)	0.0414439	1.3824	1.39258	0.0109069	0.161964	0.32063	5.44211e-07	3.06674e-05	0.941894	5.3775e-05	0.000597925	0.957774	0.0126371	0.712128	1	33.356	33.6016	1.00736
PE(46:4)_vs_PE(46:6)	0.134938	0.642879	0.631775	0.0618851	0.236489	0.201444	0.000993419	0.000400333	0.926255	0.00302772	0.00201115	0.946729	1	1	1	4.76424	4.68195	0.982727
PC(48:4)_vs_PC(52:7)	1.18165	4.46171	2.54084	0.767355	1.26133	0.974676	0.000161531	0.0140274	0.00838002	0.00109945	0.020556	0.0843349	1	1	1	3.77584	2.15026	0.569477
PC(48:4)_vs_PC(46:4)	0.0386205	0.288342	0.396284	0.0175825	0.0568662	0.0344337	9.28189e-06	1.70923e-09	0.00161615	0.000248582	1.52654e-06	0.0596745	0.215535	3.96901e-05	1	7.46604	10.261	1.37436
PC(48:4)_vs_PC(48:8)	0.0440253	0.435842	0.433697	0.0259975	0.1094	0.125126	4.88206e-05	0.000126598	0.973341	0.000573984	0.00115329	0.980519	1	1	1	9.89979	9.85108	0.99508
PC(48:4)_vs_PC(47:5)	0.350568	1.47145	1.84078	0.162948	0.282217	0.352422	4.99288e-06	5.05066e-06	0.0523645	0.000177861	0.000242317	0.150364	0.11594	0.117281	1	4.19733	5.25084	1.25099
PC(48:4)_vs_PC(48:7)	0.0385138	0.359912	0.417106	0.0173218	0.0941477	0.158918	7.81949e-05	0.000700686	0.432222	0.000739673	0.00268243	0.539719	1	1	1	9.34501	10.8301	1.15891
PC(48:4)_vs_PC(47:7)	0.416627	4.03563	5.78436	0.17775	1.39899	2.87466	0.000436293	0.00257198	0.182929	0.00188732	0.00596584	0.29826	1	1	1	9.68644	13.8838	1.43332
PC(48:4)_vs_PC(48:6)	0.0896765	0.38855	0.449339	0.0503695	0.0962494	0.140913	4.51583e-05	0.000285543	0.366933	0.000550746	0.00169407	0.478521	1	1	1	4.3328	5.01067	1.15645
PC(48:4)_vs_PC(47:6)	0.279363	3.14264	4.44328	0.143105	0.968567	1.81943	0.000198368	0.000892924	0.128808	0.00122573	0.00308341	0.241916	1	1	1	11.2493	15.905	1.41387
PC(44:2)_vs_PC(42:2)	0.666604	1.44181	1.56035	0.118524	0.281837	0.132597	0.000146515	1.76162e-08	0.341676	0.00104266	9.51317e-06	0.454284	1	0.000409066	1	2.16292	2.34074	1.08222
LPC(28:2)_vs_LPC(29:1)	0.0110991	3.82399	3.06766	0.00556988	0.693863	0.361071	6.63474e-06	5.16041e-07	0.0307025	0.000204602	7.58417e-05	0.121457	0.154065	0.011983	1	344.53	276.387	0.802215
LPC(28:2)_vs_LPC(30:0)	0.273089	2.84287	2.3148	0.115624	0.835481	0.638915	0.00016089	0.000116789	0.210425	0.00109754	0.00112128	0.326124	1	1	1	10.4101	8.47636	0.814248
PC(46:1)_vs_PC(43:2)	0.0225375	1.09068	2.0647	0.037624	0.411864	0.332446	0.000449593	2.85699e-06	0.000437289	0.00191735	0.000177385	0.0477618	1	0.0663421	1	48.3939	91.6119	1.89305
PC(46:1)_vs_PC(43:1)	0.0532653	1.24866	1.96374	0.0795284	0.339104	0.387044	5.4511e-05	7.48267e-06	0.00325662	0.000608266	0.000297526	0.0686881	1	0.173755	1	23.4424	36.8672	1.57267
PC(46:1)_vs_PC(44:1)	0.00627872	0.26017	0.3903	0.0120648	0.0625236	0.0310106	2.65215e-05	2.22768e-09	0.000870061	0.000417246	1.82025e-06	0.0516718	0.615855	5.17291e-05	1	41.4368	62.1625	1.50018
PC(46:1)_vs_PC(46:3)	0.0266333	0.698842	0.8215	0.0520623	0.144208	0.163195	4.48282e-06	4.30378e-06	0.162381	0.000171615	0.000223785	0.279265	0.104096	0.0999381	1	26.2394	30.8448	1.17552
LPC(28:1)_vs_LPC(29:1)	0.0553998	17.7293	13.7052	0.0285385	2.77105	0.734777	2.76308e-06	4.56095e-09	0.00783708	0.000133392	3.115e-06	0.0831818	0.0641614	0.00010591	1	320.025	247.388	0.773028
LPC(28:1)_vs_LPC(30:0)	1.29861	13.1622	10.2587	0.418729	3.55959	2.19246	0.000105513	2.56885e-05	0.0960462	0.000869457	0.000544264	0.204511	1	0.596513	1	10.1356	7.89974	0.779404
PC(43:1)_vs_PC(43:3)	0.470914	1.61567	1.76771	0.238919	0.361744	0.280603	3.09298e-05	9.37084e-07	0.397891	0.000449451	0.000100741	0.507091	0.718222	0.02176	1	3.43092	3.75378	1.0941
PC(43:1)_vs_PC(42:2)	0.0344983	0.169682	0.194757	0.0107809	0.0388706	0.0264223	5.04367e-05	4.45017e-07	0.186844	0.00058501	7.1046e-05	0.302248	1	0.0103337	1	4.91855	5.64541	1.14778
PC(43:1)_vs_PC(44:3)	0.0729162	0.193129	0.20492	0.0260505	0.0319351	0.0310256	6.90008e-06	2.13646e-06	0.496896	0.000208901	0.000159072	0.599119	0.160227	0.0496108	1	2.64864	2.81035	1.06105
PC(43:1)_vs_PC(42:1)	0.0419914	0.172594	0.182888	0.0130784	0.0230314	0.016576	2.20854e-07	1.25981e-09	0.357965	3.56142e-05	1.31426e-06	0.470339	0.00512845	2.9254e-05	1	4.11022	4.35537	1.05964
PC(44:1)_vs_PC(42:2)	0.31924	0.819386	0.969642	0.103929	0.238743	0.143275	0.000882928	1.0188e-06	0.184361	0.00282708	0.000103946	0.299793	1	0.0236576	1	2.56667	3.03734	1.18338
PC(44:1)_vs_PC(42:1)	0.387864	0.828284	0.917703	0.127284	0.16113	0.156995	0.000125763	1.95333e-05	0.313704	0.000954672	0.000482225	0.428148	1	0.453582	1	2.1355	2.36604	1.10796
PC(47:5)_vs_PC(45:5)	0.353016	1.06873	1.34185	0.107601	0.200671	0.114345	1.42838e-05	1.22219e-09	0.0113476	0.000307385	1.31426e-06	0.090465	0.331685	2.83805e-05	1	3.02742	3.80111	1.25556
PC(47:5)_vs_PC(46:5)	0.0406067	0.0935699	0.101752	0.0130024	0.0125908	0.00470465	5.28361e-06	4.18604e-06	0.147686	0.000183881	0.000220918	0.264004	0.122691	0.097204	1	2.3043	2.5058	1.08745
PC(46:2)_vs_PC(43:3)	0.340873	4.50679	6.97478	0.250471	1.66125	1.35307	0.000500572	8.55861e-06	0.0105596	0.00204024	0.000315206	0.0892937	1	0.198739	1	13.2213	20.4615	1.54762
PC(46:2)_vs_PC(44:2)	0.0386475	0.319663	0.488329	0.023978	0.0713858	0.0344974	1.69833e-05	2.08177e-11	0.000371225	0.00033196	1.32028e-07	0.0467503	0.394369	4.83408e-07	1	8.27124	12.6355	1.52764
PC(46:2)_vs_PC(44:1)	0.0831986	0.569222	0.794669	0.0488962	0.0907028	0.0961209	4.41905e-07	3.39006e-08	0.000715962	4.66431e-05	1.38106e-05	0.0513106	0.0102615	0.000787207	1	6.84173	9.55148	1.39606
LPC(28:0)_vs_LPC(29:1)	0.282777	8.52593	6.11445	0.125916	0.928068	1.14831	2.74663e-07	9.04129e-06	0.00109617	3.96516e-05	0.000325027	0.0556199	0.00637796	0.209948	1	30.1507	21.6228	0.717159
PC(45:2)_vs_PC(43:2)	0.246199	0.839898	1.19163	0.165298	0.200207	0.0970619	6.68093e-05	1.80409e-07	0.00256803	0.000679	4.07397e-05	0.0669593	1	0.00418929	1	3.41146	4.8401	1.41878
PC(45:2)_vs_PC(43:3)	0.22466	1.6346	1.99171	0.129045	0.58086	0.328336	0.000529782	1.24727e-06	0.18878	0.00210553	0.00011539	0.304062	1	0.0289628	1	7.27589	8.86543	1.21847
PC(45:2)_vs_PC(41:1)	0.281496	1.4852	1.92919	0.115191	0.457795	0.370791	0.000310647	8.49293e-06	0.0704078	0.00156166	0.000315206	0.17323	1	0.197214	1	5.27609	6.85334	1.29894
PC(45:2)_vs_PC(44:2)	0.0264445	0.115214	0.139837	0.0155642	0.0176309	0.00535486	4.13332e-07	2.02951e-07	0.00931267	4.5488e-05	4.32361e-05	0.0868626	0.00959797	0.00471273	1	4.35683	5.28796	1.21372
PC(45:2)_vs_PC(44:1)	0.0634026	0.206827	0.228051	0.0573787	0.0235042	0.0287974	0.000289245	8.74388e-05	0.157782	0.00150866	0.000986745	0.274403	1	1	1	3.26212	3.59686	1.10261
PC(45:2)_vs_PC(42:1)	0.0217153	0.171778	0.207262	0.0133813	0.0414456	0.0310699	3.19227e-05	4.13538e-07	0.0969602	0.000459564	6.85912e-05	0.205561	0.741276	0.00960276	1	7.91044	9.54452	1.20657
LPC(26:0)_vs_LPC(24:0)	0.589576	2.63677	3.39459	0.122226	0.998695	0.973502	0.0015384	0.000238985	0.176121	0.00396094	0.00155161	0.292149	1	1	1	4.47231	5.75767	1.2874
PC(45:1)_vs_PC(43:2)	0.00355874	0.342935	0.55722	0.00113464	0.109154	0.0740358	0.000174115	1.07671e-06	0.00138278	0.00114322	0.000106847	0.058361	1	0.0250022	1	96.3642	156.578	1.62485
PC(45:1)_vs_PC(44:2)	0.000382556	0.0467177	0.0654584	8.63729e-05	0.0116449	0.00759871	4.31481e-05	4.82646e-07	0.00488049	0.000539003	7.37336e-05	0.0755029	1	0.0112075	1	122.12	171.108	1.40115
PC(45:1)_vs_PC(43:1)	0.00821471	0.395614	0.528909	0.00399379	0.0801495	0.0782669	1.36205e-05	2.0712e-06	0.00840998	0.000299226	0.000158208	0.0843349	0.316282	0.0480953	1	48.1593	64.3857	1.33693
PC(45:1)_vs_PC(44:1)	0.000874544	0.0827413	0.105967	0.000399279	0.0147818	0.0115618	6.27967e-06	3.31811e-07	0.00712751	0.000199832	5.97286e-05	0.0820981	0.14582	0.00770499	1	94.6108	121.168	1.2807
